# Supplementary material
Source: PubMed Central journal article supplement (PMC1691506)
Supplement: 14613606s01.pdf [file 14613606s01.pdf]

These are electronic appendices to the paper by Cockburn 2003 Cooperative breeding in oscine passerines: does sociality inhibit speciation? *Proc. R. Soc. Lond. B* **270**, 2207–2214. (DOI 10.1098/rspb.2003.2503.)

Electronic appendices are refereed with the text. However, no attempt is made to impose a uniform editorial style on the electronic appendices.

## Electronic Appendix A.

Table 2. A survey of the patterns of parental care in the oscine passerines.

*Systematics.* Taxonomy generally follows Sibley & Monroe (449, 450), though the order of taxa has been amended to follow the proposals by Barker et al. used in this study (32). However, I have also adopted the following systematic changes. The cnemophilines were removed from Paradisaeini and placed close to the basal clade containing Ptilonorhynchidae (98). *Macgregoria* was removed from Paradisaeini and placed in a marginal position in Meliphagidae (98). *Apalopteron* was removed from Meliphagidae and placed adjacent to *Cleptornis* in the Zosteropidae (463). *Leptopoecile* was moved from Sylviidae to Aegithalidae (473). Melanocharitidae were moved from Passerida to a position adjacent to Petroicidae (473). *Chloropsis* and *Irena* were moved to a position within the Passerida (32). All brood parasitic finches were consolidated into a single subfamily, the Viduinae (462). The traditional subgenera of *Parus* were treated as full genera (456). I based my treatment of icterids on the extensive work of Lanyon and colleagues (261, 285-287, 398). Because a formal delimitation of genera has not been proposed, I have erected new clusters as genera (see below). Because the most recent review of social systems in the highly cooperative genus *Amytornis* recognises additional species, I have used the sequence adopted by those authors (228).

*Clade.* This refers to the Family, Subfamily or Tribe, depending on the extent to which the taxa were divided by Sibley & Ahlquist (449, 450)

*Region.* Broad regional categories have been used. 'Africa' is interpreted to exclude the Palearctic, and 'America' to exclude the Nearctic. Se Asia and Australia are generally divided by Wallace's Line. Islands are assigned to their nearest continental region, or in the case of ambiguity to the continental region which was the source of the taxon under consideration. Thus Hawaiian meliphagids are considered Australian, and drepanids American.

*Movement.* Because most explanations of cooperative breeding emphasise philopatry, I distinguished species reported as year-round **residents** from those that were mobile during the year, as a consequence of **migration** or **nomadism**. Where residency was mixed with mobility within or between populations I classified their mobility as **partial**.

*Island.* I have called a species endemic on small oceanic islands if its entire distribution is confined to one or more small islands. Madagascar, the Greater Sundas, the large islands of Japan and the Philippines, and New Zealand are not considered small islands, but I have treated as endemics those birds confined to small islands within the Philippines and the Japan archipelago.

*Clutch.* Where the clutch size was represented in the literature as a range I report the mid-point if an integer, and I have rounded down in cases such as 3-4.

| Family            | Clade Reference   | Genus           | species        | Parental care | Region    | Movement | Island  | Clutch       |
|-------------------|-------------------|-----------------|----------------|---------------|-----------|----------|---------|--------------|
| Menuridae         | Menurinae         | Menura          | alberti        | Uniparental   | Australia | Resident |         | 1 (228)      |
| Menuridae         | Menurinae         | Menura          | novaeollandiae | Uniparental   | Australia | Resident |         | 1 (228)      |
| Menuridae         | Atrichothorninae  | Atrichornis     | rufescens      | Uniparental   | Australia | Resident |         | 2 (228)      |
| Menuridae         | Atrichothorninae  | Atrichornis     | clamosus       | Uniparental   | Australia | Resident |         | 1 (228)      |
| Climacteridae     | Climacteridae     | Cormobates      | placens        | Unknown       | Australia | Resident |         | (87)         |
| Climacteridae     | Climacteridae     | Cormobates      | leucophaeus    | Pair          | Australia | Resident |         | 2 (228)      |
| Climacteridae     | Climacteridae     | Climacteris     | affinis        | Cooperation   | Australia | Resident |         | 2 (228)      |
| Climacteridae     | Climacteridae     | Climacteris     | erythropros    | Cooperation   | Australia | Resident |         | 2 (228)      |
| Climacteridae     | Climacteridae     | Climacteris     | picumnus       | Cooperation   | Australia | Resident |         | 3 (228)      |
| Climacteridae     | Climacteridae     | Climacteris     | melanura       | Cooperation   | Australia | Resident |         | 2 (228)      |
| Climacteridae     | Climacteridae     | Climacteris     | rufa           | Cooperation   | Australia | Resident |         | 2 (87)       |
| Ptilonorhynchidae | Ptilonorhynchidae | Ailuroedus      | buccoides      | Pair          | Australia | Resident |         | 1 (87)       |
| Ptilonorhynchidae | Ptilonorhynchidae | Ailuroedus      | melanotis      | Pair          | Australia | Resident |         | 2 (171)      |
| Ptilonorhynchidae | Ptilonorhynchidae | Ailuroedus      | crassirostris  | Pair          | Australia | Resident |         | 2 (171)      |
| Ptilonorhynchidae | Ptilonorhynchidae | Ailuroedus      | dentirostris   | Uniparental   | Australia | Resident |         | 2 (169)      |
| Ptilonorhynchidae | Ptilonorhynchidae | Archboldia      | papuensis      | Uniparental   | Australia | Resident |         | 1 (159)      |
| Ptilonorhynchidae | Ptilonorhynchidae | Archboldia      | sanfordi       | Uniparental   | Australia | Resident |         | (159)        |
| Ptilonorhynchidae | Ptilonorhynchidae | Amblyornis      | inornatus      | Uniparental   | Australia | Resident |         | (159)        |
| Ptilonorhynchidae | Ptilonorhynchidae | Amblyornis      | macgregoriae   | Uniparental   | Australia | Resident |         | 1 (159)      |
| Ptilonorhynchidae | Ptilonorhynchidae | Amblyornis      | subalaris      | Uniparental   | Australia | Resident |         | 1 (159)      |
| Ptilonorhynchidae | Ptilonorhynchidae | Amblyornis      | flavifrons     | Uniparental   | Australia | Resident |         | (159)        |
| Ptilonorhynchidae | Ptilonorhynchidae | Prionodura      | newtoniana     | Uniparental   | Australia | Resident |         | 2 (159)      |
| Ptilonorhynchidae | Ptilonorhynchidae | Sericulus       | aureus         | Uniparental   | Australia | Resident |         | (159)        |
| Ptilonorhynchidae | Ptilonorhynchidae | Sericulus       | bakeri         | Uniparental   | Australia | Resident |         | (159)        |
| Ptilonorhynchidae | Ptilonorhynchidae | Sericulus       | chrysocephalus | Uniparental   | Australia | Resident |         | 2 (159, 470) |
| Ptilonorhynchidae | Ptilonorhynchidae | Ptilonorhynchus | violaceus      | Uniparental   | Australia | Resident |         | 2 (159, 470) |
| Ptilonorhynchidae | Ptilonorhynchidae | Chlamydera      | guttata        | Uniparental   | Australia | Resident |         | 2 (159, 470) |
| Ptilonorhynchidae | Ptilonorhynchidae | Chlamydera      | maculata       | Uniparental   | Australia | Resident |         | 2 (159, 470) |
| Ptilonorhynchidae | Ptilonorhynchidae | Chlamydera      | nuchalis       | Uniparental   | Australia | Resident |         | 1 (159, 470) |
| Ptilonorhynchidae | Ptilonorhynchidae | Chlamydera      | lauterbachii   | Uniparental   | Australia | Resident |         | 1 (159)      |
| Ptilonorhynchidae | Ptilonorhynchidae | Chlamydera      | cerviniventris | Uniparental   | Australia | Resident |         | 1 (159)      |
| b. Cnemophilidae  | b. Cnemophilidae  | Loboparadisea   | sericea        | Unknown       | Australia | Resident |         | (168)        |
| b. Cnemophilidae  | b. Cnemophilidae  | Cnemophilus     | macgregorii    | Uniparental   | Australia | Resident |         | (168)        |
| b. Cnemophilidae  | b. Cnemophilidae  | Cnemophilus     | loriae         | Uniparental   | Australia | Resident |         | 1 (168)      |
| Maluridae         | Malurini          | Clytomyias      | insignis       | Unknown       | Australia | Resident |         | (432)        |
| Maluridae         | Malurini          | Sipodotus       | wallacii       | Cooperation   | Australia | Resident |         | (87)         |
| Maluridae         | Malurini          | Malurus         | grayi          | Cooperation   | Australia | Resident |         | 2 (432)      |
| Maluridae         | Malurini          | Malurus         | campbelli      | Cooperation   | Australia | Resident |         | (432)        |
| Maluridae         | Malurini          | Malurus         | alboscapulatus | Cooperation   | Australia | Resident |         | 3 (432)      |
| Maluridae         | Malurini          | Malurus         | melanocephalus | Cooperation   | Australia | Resident |         | 3 (228)      |
| Maluridae         | Malurini          | Malurus         | leucopterus    | Cooperation   | Australia | Resident |         | 3 (228)      |
| Maluridae         | Malurini          | Malurus         | cyaneus        | Cooperation   | Australia | Resident |         | 3 (228)      |
| Maluridae         | Malurini          | Malurus         | splendens      | Cooperation   | Australia | Resident |         | 3 (228)      |
| Maluridae         | Malurini          | Malurus         | lamberti       | Cooperation   | Australia | Resident |         | 3 (228)      |
| Maluridae         | Malurini          | Malurus         | amabilis       | Cooperation   | Australia | Resident |         | 3 (228)      |
| Maluridae         | Malurini          | Malurus         | elegans        | Cooperation   | Australia | Resident |         | 3 (228)      |
| Maluridae         | Malurini          | Malurus         | pulcherrimus   | Cooperation   | Australia | Resident |         | 3 (228)      |
| Maluridae         | Malurini          | Malurus         | coronatus      | Cooperation   | Australia | Resident |         | 3 (228)      |
| Maluridae         | Malurini          | Malurus         | cyanocephalus  | Suspected     | Australia | Resident |         | (432)        |
| Maluridae         | Stipiturini       | Stipiturus      | ruficeps       | Unknown       | Australia | Resident |         | 3 (228)      |
| Maluridae         | Stipiturini       | Stipiturus      | malachurus     | Suspected     | Australia | Resident |         | 3 (228)      |
| Maluridae         | Stipiturini       | Stipiturus      | mallee         | Unknown       | Australia | Resident |         | 3 (228)      |
| Maluridae         | Amytornithinae    | Amytornis       | barbatus       | Suspected     | Australia | Resident |         | 2 (228)      |
| Maluridae         | Amytornithinae    | Amytornis       | woodwardi      | Cooperation   | Australia | Resident |         | 2 (369)      |
| Maluridae         | Amytornithinae    | Amytornis       | dorotheae      | Suspected     | Australia | Resident |         | 2 (432)      |
| Maluridae         | Amytornithinae    | Amytornis       | striatus       | Cooperation   | Australia | Resident |         | 2 (267)      |
| Maluridae         | Amytornithinae    | Amytornis       | merrotsoyi     | Unknown       | Australia | Resident |         | (228)        |
| Maluridae         | Amytornithinae    | Amytornis       | goyderi        | Unknown       | Australia | Resident |         | 2 (228)      |
| Maluridae         | Amytornithinae    | Amytornis       | textilis       | Cooperation   | Australia | Resident |         | 2 (432)      |
| Maluridae         | Amytornithinae    | Amytornis       | purnelli       | Suspected     | Australia | Resident |         | (432)        |
| Maluridae         | Amytornithinae    | Amytornis       | housei         | Cooperation   | Australia | Resident |         | 2 (165)      |
| Maluridae         | Amytornithinae    | Amytornis       | kalkadoon      | Cooperation   | Australia | Resident |         | 2 (228)      |
| Meliphagidae      | Meliphagidae      | Myzomela        | blasii         | Unknown       | Australia | Resident | Endemic | (88)         |
| Meliphagidae      | Meliphagidae      | Myzomela        | albigula       | Unknown       | Australia | Resident |         | (87)         |
| Meliphagidae      | Meliphagidae      | Myzomela        | eques          | Unknown       | Australia | Nomadic  |         | 2 (87)       |
| Meliphagidae      | Meliphagidae      | Myzomela        | obscura        | Unknown       | Australia | Resident |         | 2 (228)      |
| Meliphagidae      | Meliphagidae      | Myzomela        | cruentata      | Unknown       | Australia | Resident |         | (88)         |
| Meliphagidae      | Meliphagidae      | Myzomela        | nigrita        | Unknown       | Australia | Resident |         | (88)         |
| Meliphagidae      | Meliphagidae      | Myzomela        | pulchella      | Unknown       | Australia | Resident | Endemic | no source    |
| Meliphagidae      | Meliphagidae      | Myzomela        | adolphinae     | Unknown       | Australia | Nomadic  |         | (87)         |
| Meliphagidae      | Meliphagidae      | Myzomela        | kuehni         | Unknown       | Australia | Resident | Endemic | (46)         |
| Meliphagidae      | Meliphagidae      | Myzomela        | dammermani     | Unknown       | Australia | Resident | Endemic | (88)         |
| Meliphagidae      | Meliphagidae      | Myzomela        | erythrocephala | Unknown       | Australia | Resident |         | (228)        |

| Family       | Clade Reference | Genus         | species         | Parental care | Region    | Movement  | Island  | Clutch       |
|--------------|-----------------|---------------|-----------------|---------------|-----------|-----------|---------|--------------|
| Meliphagidae | Meliphagidae    | Myzomela      | chloroptera     | Unknown       | Australia | Resident  |         | (88)         |
| Meliphagidae | Meliphagidae    | Myzomela      | wakoloensis     | Unknown       | Australia | Resident  | Endemic | (88)         |
| Meliphagidae | Meliphagidae    | Myzomela      | boiei           | Unknown       | Australia | Resident  | Endemic | (88)         |
| Meliphagidae | Meliphagidae    | Myzomela      | sanguinolenta   | Pair          | Australia | Partial   |         | 2 (228)      |
| Meliphagidae | Meliphagidae    | Myzomela      | caledonica      | Pair          | Australia | Resident  | Endemic | 2 (220)      |
| Meliphagidae | Meliphagidae    | Myzomela      | rubrata         | Unknown       | Australia | Resident  | Endemic | (102)        |
| Meliphagidae | Meliphagidae    | Myzomela      | cardinalis      | Pair          | Australia | Resident  | Endemic | 4 (53)       |
| Meliphagidae | Meliphagidae    | Myzomela      | chermesina      | Unknown       | Australia | Resident  | Endemic | (508)        |
| Meliphagidae | Meliphagidae    | Myzomela      | sclateri        | Pair          | Australia | Resident  |         | 1 (87)       |
| Meliphagidae | Meliphagidae    | Myzomela      | pammelaena      | Unknown       | Australia | Resident  | Endemic | (121)        |
| Meliphagidae | Meliphagidae    | Myzomela      | lafargei        | Unknown       | Australia | Resident  | Endemic | (87)         |
| Meliphagidae | Meliphagidae    | Myzomela      | eichhorni       | Unknown       | Australia | Resident  | Endemic | no source    |
| Meliphagidae | Meliphagidae    | Myzomela      | melanocephala   | Unknown       | Australia | Resident  | Endemic | no source    |
| Meliphagidae | Meliphagidae    | Myzomela      | malaitae        | Unknown       | Australia | Resident  | Endemic | (46)         |
| Meliphagidae | Meliphagidae    | Myzomela      | tristrami       | Unknown       | Australia | Resident  | Endemic | (120)        |
| Meliphagidae | Meliphagidae    | Myzomela      | jugularis       | Unknown       | Australia | Nomadic   | Endemic | (508)        |
| Meliphagidae | Meliphagidae    | Myzomela      | erythromelas    | Unknown       | Australia | Resident  | Endemic | no source    |
| Meliphagidae | Meliphagidae    | Myzomela      | vulnerata       | Unknown       | Australia | Resident  | Endemic | (88)         |
| Meliphagidae | Meliphagidae    | Myzomela      | rosenbergii     | Unknown       | Australia | Nomadic   |         | 2 (87)       |
| Meliphagidae | Meliphagidae    | Certhionyx    | pectoralis      | Unknown       | Australia | Nomadic   |         | 2 (228)      |
| Meliphagidae | Meliphagidae    | Certhionyx    | niger           | Pair          | Australia | Migration |         | 2 (228)      |
| Meliphagidae | Meliphagidae    | Certhionyx    | variegatus      | Pair          | Australia | Nomadic   |         | 2 (228)      |
| Meliphagidae | Meliphagidae    | Timeliopsis   | fulviga         | Unknown       | Australia | Resident  |         | 1 (87)       |
| Meliphagidae | Meliphagidae    | Timeliopsis   | griseigula      | Unknown       | Australia | Resident  |         | (87)         |
| Meliphagidae | Meliphagidae    | Melilestes    | megarhynchus    | Pair          | Australia | Resident  |         | 2 (87)       |
| Meliphagidae | Meliphagidae    | Stresemannia  | bougainvillei   | Unknown       | Australia | Resident  | Endemic | (87)         |
| Meliphagidae | Meliphagidae    | Glycichaera   | fallax          | Unknown       | Australia | Resident  |         | (228)        |
| Meliphagidae | Meliphagidae    | Lichmera      | lombokia        | Unknown       | Australia | Resident  | Endemic | (88)         |
| Meliphagidae | Meliphagidae    | Lichmera      | argentauris     | Unknown       | Australia | Resident  | Endemic | (88)         |
| Meliphagidae | Meliphagidae    | Lichmera      | limbata         | Unknown       | Australia | Resident  | Endemic | no source    |
| Meliphagidae | Meliphagidae    | Lichmera      | indistincta     | Pair          | Australia | Nomadic   |         | 2 (228)      |
| Meliphagidae | Meliphagidae    | Lichmera      | incana          | Pair          | Australia | Resident  | Endemic | 2 (220)      |
| Meliphagidae | Meliphagidae    | Lichmera      | squamata        | Unknown       | Australia | Resident  | Endemic | (88)         |
| Meliphagidae | Meliphagidae    | Lichmera      | alboauricularis | Unknown       | Australia | Resident  |         | 2 (87)       |
| Meliphagidae | Meliphagidae    | Lichmera      | deningeri       | Unknown       | Australia | Resident  | Endemic | (88)         |
| Meliphagidae | Meliphagidae    | Lichmera      | monticola       | Unknown       | Australia | Resident  | Endemic | (88)         |
| Meliphagidae | Meliphagidae    | Lichmera      | flavicans       | Unknown       | Australia | Resident  | Endemic | (88)         |
| Meliphagidae | Meliphagidae    | Lichmera      | notabilis       | Unknown       | Australia | Resident  | Endemic | (46)         |
| Meliphagidae | Meliphagidae    | Trichodere    | cockerelli      | Unknown       | Australia | Resident  |         | 2 (228)      |
| Meliphagidae | Meliphagidae    | Meliphaga     | montana         | Unknown       | Australia | Resident  |         | (87)         |
| Meliphagidae | Meliphagidae    | Meliphaga     | mimikae         | Unknown       | Australia | Resident  |         | (87)         |
| Meliphagidae | Meliphagidae    | Meliphaga     | orientalis      | Unknown       | Australia | Resident  |         | (87)         |
| Meliphagidae | Meliphagidae    | Meliphaga     | albonotata      | Pair          | Australia | Resident  |         | 1 (87)       |
| Meliphagidae | Meliphagidae    | Meliphaga     | aruensis        | Pair          | Australia | Resident  |         | 2 (87)       |
| Meliphagidae | Meliphagidae    | Meliphaga     | analoga         | Unknown       | Australia | Resident  |         | (87)         |
| Meliphagidae | Meliphagidae    | Meliphaga     | vicina          | Unknown       | Australia | Resident  |         | (87)         |
| Meliphagidae | Meliphagidae    | Meliphaga     | gracilis        | Unknown       | Australia | Resident  |         | 2 (228)      |
| Meliphagidae | Meliphagidae    | Meliphaga     | notata          | Unknown       | Australia | Resident  |         | 2 (228)      |
| Meliphagidae | Meliphagidae    | Meliphaga     | flavirictus     | Unknown       | Australia | Resident  |         | (87)         |
| Meliphagidae | Meliphagidae    | Meliphaga     | lewinii         | Unknown       | Australia | Resident  |         | 2 (228)      |
| Meliphagidae | Meliphagidae    | Meliphaga     | albilineata     | Occasional    | Australia | Resident  |         | 2 (228)      |
| Meliphagidae | Meliphagidae    | Meliphaga     | reticulata      | Unknown       | Australia | Resident  | Endemic | (88)         |
| Meliphagidae | Meliphagidae    | Guadalcanaria | inexpectata     | Pair          | Australia | Resident  | Endemic | 1 (220)      |
| Meliphagidae | Meliphagidae    | Foulehaio     | carunculata     | Pair          | Australia | Resident  | Endemic | 1 (508)      |
| Meliphagidae | Meliphagidae    | Lichenostomus | subfrenatus     | Unknown       | Australia | Resident  |         | (87)         |
| Meliphagidae | Meliphagidae    | Lichenostomus | obscurus        | Unknown       | Australia | Resident  |         | 2 (87)       |
| Meliphagidae | Meliphagidae    | Lichenostomus | frenatus        | Unknown       | Australia | Resident  |         | 2 (228)      |
| Meliphagidae | Meliphagidae    | Lichenostomus | hindwoodi       | Unknown       | Australia | Resident  |         | 2 (228)      |
| Meliphagidae | Meliphagidae    | Lichenostomus | chrytops        | Occasional    | Australia | Partial   |         | 2 (228, 495) |
| Meliphagidae | Meliphagidae    | Lichenostomus | versicolor      | Cooperation   | Australia | Resident  |         | 2 (228)      |
| Meliphagidae | Meliphagidae    | Lichenostomus | fasciocularis   | Unknown       | Australia | Resident  |         | 2 (228)      |
| Meliphagidae | Meliphagidae    | Lichenostomus | virescens       | Cooperation   | Australia | Resident  |         | 2 (77, 228)  |
| Meliphagidae | Meliphagidae    | Lichenostomus | flavus          | Cooperation   | Australia | Resident  |         | 2 (228)      |
| Meliphagidae | Meliphagidae    | Lichenostomus | unicolor        | Pair          | Australia | Resident  |         | 2 (228)      |
| Meliphagidae | Meliphagidae    | Lichenostomus | leucotis        | Pair          | Australia | Resident  |         | 2 (228)      |
| Meliphagidae | Meliphagidae    | Lichenostomus | flavicollis     | Pair          | Australia | Partial   |         | 2 (228)      |
| Meliphagidae | Meliphagidae    | Lichenostomus | melanops        | Cooperation   | Australia | Resident  |         | 2 (228, 495) |
| Meliphagidae | Meliphagidae    | Lichenostomus | cratitius       | Unknown       | Australia | Resident  |         | 2 (228)      |
| Meliphagidae | Meliphagidae    | Lichenostomus | keartlandi      | Unknown       | Australia | Nomadic   |         | 2 (228)      |
| Meliphagidae | Meliphagidae    | Lichenostomus | flavescens      | Pair          | Australia | Resident  |         | 2 (228)      |
| Meliphagidae | Meliphagidae    | Lichenostomus | fuscus          | Occasional    | Australia | Partial   |         | 2 (228)      |
| Meliphagidae | Meliphagidae    | Lichenostomus | plumulus        | Pair          | Australia | Nomadic   |         | 2 (228)      |
| Meliphagidae | Meliphagidae    | Lichenostomus | ornatus         | Occasional    | Australia | Resident  |         | 2 (228)      |

| Family       | Clade Reference | Genus         | species         | Parental care | Region    | Movement | Island  | Clutch       |
|--------------|-----------------|---------------|-----------------|---------------|-----------|----------|---------|--------------|
| Meliphagidae | Meliphagidae    | Lichenostomus | penicillatus    | Cooperation   | Australia | Resident |         | 2 (228)      |
| Meliphagidae | Meliphagidae    | Xanthotis     | flaviventer     | Unknown       | Australia | Resident |         | 2 (228)      |
| Meliphagidae | Meliphagidae    | Xanthotis     | polygramma      | Unknown       | Australia | Resident |         | (87)         |
| Meliphagidae | Meliphagidae    | Xanthotis     | macleayana      | Unknown       | Australia | Resident |         | 2 (228)      |
| Meliphagidae | Meliphagidae    | Xanthotis     | provocator      | Unknown       | Australia | Resident | Endemic | 1 (508)      |
| Meliphagidae | Meliphagidae    | Oreornis      | chrysogenys     | Unknown       | Australia | Resident |         | no source    |
| Meliphagidae | Meliphagidae    | Melithreptus  | lunatus         | Cooperation   | Australia | Partial  |         | 3 (228)      |
| Meliphagidae | Meliphagidae    | Melithreptus  | affinis         | Cooperation   | Australia | Resident |         | 3 (228)      |
| Meliphagidae | Meliphagidae    | Melithreptus  | albogularis     | Cooperation   | Australia | Resident |         | 2 (228)      |
| Meliphagidae | Meliphagidae    | Melithreptus  | laetior         | Cooperation   | Australia | Resident |         | 2 (228)      |
| Meliphagidae | Meliphagidae    | Melithreptus  | gularis         | Cooperation   | Australia | Partial  |         | 2 (228)      |
| Meliphagidae | Meliphagidae    | Melithreptus  | validirostris   | Cooperation   | Australia | Resident |         | 3 (228)      |
| Meliphagidae | Meliphagidae    | Melithreptus  | brevirostris    | Cooperation   | Australia | Partial  |         | 3 (228, 368) |
| Meliphagidae | Meliphagidae    | Notiomystis   | cincta          | Cooperation   | Australia | Resident |         | 4 (67, 228)  |
| Meliphagidae | Meliphagidae    | Pycnopygius   | ixoides         | Unknown       | Australia | Resident |         | (87)         |
| Meliphagidae | Meliphagidae    | Pycnopygius   | cinereus        | Unknown       | Australia | Resident |         | (87)         |
| Meliphagidae | Meliphagidae    | Pycnopygius   | stictocephalus  | Unknown       | Australia | Resident |         | (87)         |
| Meliphagidae | Meliphagidae    | Melitograis   | gilolensis      | Unknown       | Australia | Resident | Endemic | (88)         |
| Meliphagidae | Meliphagidae    | Philemon      | meyeri          | Unknown       | Australia | Resident |         | (87)         |
| Meliphagidae | Meliphagidae    | Philemon      | inornatus       | Unknown       | Australia | Resident | Endemic | (88)         |
| Meliphagidae | Meliphagidae    | Philemon      | kisserensis     | Unknown       | Australia | Resident | Endemic | (88)         |
| Meliphagidae | Meliphagidae    | Philemon      | brassi          | Unknown       | Australia | Resident |         | (46)         |
| Meliphagidae | Meliphagidae    | Philemon      | citreogularis   | Pair          | Australia | Partial  |         | 3 (228)      |
| Meliphagidae | Meliphagidae    | Philemon      | fuscicapillus   | Unknown       | Australia | Resident | Endemic | (92)         |
| Meliphagidae | Meliphagidae    | Philemon      | moluccensis     | Unknown       | Australia | Resident | Endemic | (88)         |
| Meliphagidae | Meliphagidae    | Philemon      | subcorniculatus | Unknown       | Australia | Resident | Endemic | (88)         |
| Meliphagidae | Meliphagidae    | Philemon      | bucerooides     | Unknown       | Australia | Resident |         | 4 (228)      |
| Meliphagidae | Meliphagidae    | Philemon      | novaequinaeae   | Unknown       | Australia | Resident |         | no source    |
| Meliphagidae | Meliphagidae    | Philemon      | albitorques     | Unknown       | Australia | Resident | Endemic | (87)         |
| Meliphagidae | Meliphagidae    | Philemon      | cockerelli      | Pair          | Australia | Resident | Endemic | (87)         |
| Meliphagidae | Meliphagidae    | Philemon      | eichhorni       | Unknown       | Australia | Resident | Endemic | (87)         |
| Meliphagidae | Meliphagidae    | Philemon      | argenticeps     | Pair          | Australia | Resident |         | 2 (228)      |
| Meliphagidae | Meliphagidae    | Philemon      | corniculatus    | Pair          | Australia | Partial  |         | 3 (228)      |
| Meliphagidae | Meliphagidae    | Philemon      | diemenensis     | Unknown       | Australia | Resident | Endemic | 2 (220)      |
| Meliphagidae | Meliphagidae    | Ptiloprora    | plumbea         | Unknown       | Australia | Resident |         | (87)         |
| Meliphagidae | Meliphagidae    | Ptiloprora    | meekiana        | Unknown       | Australia | Resident |         | (87)         |
| Meliphagidae | Meliphagidae    | Ptiloprora    | erythropleura   | Unknown       | Australia | Resident |         | no source    |
| Meliphagidae | Meliphagidae    | Ptiloprora    | mayri           | Unknown       | Australia | Resident |         | (87)         |
| Meliphagidae | Meliphagidae    | Ptiloprora    | guisei          | Unknown       | Australia | Resident |         | (87)         |
| Meliphagidae | Meliphagidae    | Ptiloprora    | perstriata      | Unknown       | Australia | Resident |         | 1 (87)       |
| Meliphagidae | Meliphagidae    | Melidectes    | fuscus          | Unknown       | Australia | Resident |         | 1 (87)       |
| Meliphagidae | Meliphagidae    | Melidectes    | whitemanensis   | Unknown       | Australia | Resident | Endemic | (87)         |
| Meliphagidae | Meliphagidae    | Melidectes    | nouhuysi        | Unknown       | Australia | Resident |         | no source    |
| Meliphagidae | Meliphagidae    | Melidectes    | princeps        | Unknown       | Australia | Resident |         | (46)         |
| Meliphagidae | Meliphagidae    | Melidectes    | ochromelas      | Unknown       | Australia | Resident |         | (87)         |
| Meliphagidae | Meliphagidae    | Melidectes    | leucostephes    | Unknown       | Australia | Resident |         | no source    |
| Meliphagidae | Meliphagidae    | Melidectes    | belfordi        | Unknown       | Australia | Resident |         | 1 (87)       |
| Meliphagidae | Meliphagidae    | Melidectes    | rufocrossalis   | Unknown       | Australia | Resident |         | 1 (87)       |
| Meliphagidae | Meliphagidae    | Melidectes    | foersteri       | Unknown       | Australia | Resident |         | (87)         |
| Meliphagidae | Meliphagidae    | Melidectes    | torquatus       | Unknown       | Australia | Resident |         | 1 (87)       |
| Meliphagidae | Meliphagidae    | Melidectes    | sclateri        | Unknown       | Australia | Resident | Endemic | no source    |
| Meliphagidae | Meliphagidae    | Melipotus     | gymnops         | Unknown       | Australia | Resident |         | no source    |
| Meliphagidae | Meliphagidae    | Melipotus     | fumigatus       | Unknown       | Australia | Resident |         | 1 (87)       |
| Meliphagidae | Meliphagidae    | Melipotus     | ater            | Unknown       | Australia | Resident |         | (87)         |
| Meliphagidae | Meliphagidae    | Myza          | celebensis      | Unknown       | Australia | Resident |         | (88)         |
| Meliphagidae | Meliphagidae    | Myza          | sarasinorum     | Unknown       | Australia | Resident |         | (88)         |
| Meliphagidae | Meliphagidae    | Gymnomyza     | viridis         | Unknown       | Australia | Resident | Endemic | (46)         |
| Meliphagidae | Meliphagidae    | Gymnomyza     | samoensis       | Unknown       | Australia | Resident | Endemic | (508)        |
| Meliphagidae | Meliphagidae    | Gymnomyza     | aubryana        | Pair          | Australia | Resident | Endemic | (46)         |
| Meliphagidae | Meliphagidae    | Moho          | braccatus       | Unknown       | Australia | Resident | Endemic | (476)        |
| Meliphagidae | Meliphagidae    | Moho          | apicalis        | Unknown       | Australia | Resident | Endemic | (476)        |
| Meliphagidae | Meliphagidae    | Moho          | bishopi         | Unknown       | Australia | Resident | Endemic | (476)        |
| Meliphagidae | Meliphagidae    | Moho          | nobilis         | Unknown       | Australia | Resident | Endemic | (476)        |
| Meliphagidae | Meliphagidae    | Chaetoptila   | angustipluma    | Unknown       | Australia | Resident | Endemic | (476)        |
| Meliphagidae | Meliphagidae    | Phylidonyris  | pyrrhoptera     | Pair          | Australia | Partial  |         | 2 (228)      |
| Meliphagidae | Meliphagidae    | Phylidonyris  | novaehollandiae | Occasional    | Australia | Resident |         | 2 (228)      |
| Meliphagidae | Meliphagidae    | Phylidonyris  | nigra           | Pair          | Australia | Resident |         | 2 (228)      |
| Meliphagidae | Meliphagidae    | Phylidonyris  | albifrons       | Pair          | Australia | Nomadic  |         | 2 (228)      |
| Meliphagidae | Meliphagidae    | Phylidonyris  | undulata        | Unknown       | Australia | Resident | Endemic | no source    |
| Meliphagidae | Meliphagidae    | Phylidonyris  | notabilis       | Unknown       | Australia | Resident | Endemic | (53)         |
| Meliphagidae | Meliphagidae    | Phylidonyris  | melanops        | Pair          | Australia | Resident |         | 2 (228)      |
| Meliphagidae | Meliphagidae    | Ramsayornis   | modestus        | Unknown       | Australia | Nomadic  |         | 2 (228)      |
| Meliphagidae | Meliphagidae    | Ramsayornis   | fasciatus       | Suspected     | Australia | Resident |         | 2 (228)      |

| Family        | Clade Reference | Genus           | species         | Parental care | Region    | Movement  | Island | Clutch          |
|---------------|-----------------|-----------------|-----------------|---------------|-----------|-----------|--------|-----------------|
| Meliphagidae  | Meliphagidae    | Plectorhyncha   | lanceolata      | Cooperation   | Australia | Resident  |        | 3 (228, 345)    |
| Meliphagidae  | Meliphagidae    | Conopophila     | albugularis     | Pair          | Australia | Resident  |        | 2 (228)         |
| Meliphagidae  | Meliphagidae    | Conopophila     | rufogularis     | Suspected     | Australia | Nomadic   |        | 3 (228)         |
| Meliphagidae  | Meliphagidae    | Conopophila     | whitei          | Unknown       | Australia | Nomadic   |        | 2 (228)         |
| Meliphagidae  | Meliphagidae    | Grantiella      | picta           | Pair          | Australia | Migration |        | 2 (228)         |
| Meliphagidae  | Meliphagidae    | Xanthomyza      | phrygia         | Pair          | Australia | Nomadic   |        | 2 (228)         |
| Meliphagidae  | Meliphagidae    | Acanthorhynchus | tenuirostris    | Pair          | Australia | Partial   |        | 2 (228)         |
| Meliphagidae  | Meliphagidae    | Acanthorhynchus | superciliosus   | Pair          | Australia | Partial   |        | 2 (228)         |
| Meliphagidae  | Meliphagidae    | Entomyzon       | cyanotis        | Cooperation   | Australia | Partial   |        | 2 (228)         |
| Meliphagidae  | Meliphagidae    | Manorina        | melanophrys     | Cooperation   | Australia | Resident  |        | 2 (228)         |
| Meliphagidae  | Meliphagidae    | Manorina        | melanocephala   | Cooperation   | Australia | Resident  |        | 3 (228)         |
| Meliphagidae  | Meliphagidae    | Manorina        | flavigula       | Cooperation   | Australia | Resident  |        | 3 (228)         |
| Meliphagidae  | Meliphagidae    | Anthornis       | melanura        | Pair          | Australia | Partial   |        | 3 (228)         |
| Meliphagidae  | Meliphagidae    | Acanthagenys    | rufogularis     | Unknown       | Australia | Partial   |        | 2 (228)         |
| Meliphagidae  | Meliphagidae    | Anthochaera     | lunulata        | Cooperation   | Australia | Partial   |        | 2 (228)         |
| Meliphagidae  | Meliphagidae    | Anthochaera     | chrysoptera     | Unknown       | Australia | Resident  |        | 1 (228)         |
| Meliphagidae  | Meliphagidae    | Anthochaera     | carunculata     | Occasional    | Australia | Nomadic   |        | 2 (228)         |
| Meliphagidae  | Meliphagidae    | Anthochaera     | paradoxa        | Pair          | Australia | Nomadic   |        | 3 (228)         |
| Meliphagidae  | Meliphagidae    | Prothemadera    | novaeseelandiae | Pair          | Australia | Partial   |        | 4 (228)         |
| Meliphagidae  | Meliphagidae    | Epthianura      | tricolor        | Pair          | Australia | Partial   |        | 3 (228)         |
| Meliphagidae  | Meliphagidae    | Epthianura      | aurifrons       | Pair          | Australia | Partial   |        | 3 (228)         |
| Meliphagidae  | Meliphagidae    | Epthianura      | crocea          | Unknown       | Australia | Nomadic   |        | 3 (228)         |
| Meliphagidae  | Meliphagidae    | Epthianura      | albifrons       | Pair          | Australia | Partial   |        | 3 (228)         |
| Meliphagidae  | Meliphagidae    | Ashbyia         | lovensis        | Unknown       | Australia | Nomadic   |        | 3 (228)         |
| Meliphagidae  | Meliphagidae    | Macgregoria     | pulchra         | Pair          | Australia | Resident  |        | 1 (168)         |
| Pardalotidae  | Pardalotinae    | Pardalotus      | punctatus       | Pair          | Australia | Resident  |        | 4 (227)         |
| Pardalotidae  | Pardalotinae    | Pardalotus      | quadragintus    | Pair          | Australia | Resident  |        | 4 (227)         |
| Pardalotidae  | Pardalotinae    | Pardalotus      | rubricatus      | Pair          | Australia | Resident  |        | 3 (227)         |
| Pardalotidae  | Pardalotinae    | Pardalotus      | striatus        | Cooperation   | Australia | Partial   |        | 4 (227)         |
| Pardalotidae  | Dasyornithinae  | Dasyornis       | longirostris    | Pair          | Australia | Resident  |        | 2 (227)         |
| Pardalotidae  | Dasyornithinae  | Dasyornis       | brachypterus    | Pair          | Australia | Resident  |        | 2 (227)         |
| Pardalotidae  | Dasyornithinae  | Dasyornis       | broadbenti      | Pair          | Australia | Resident  |        | 2 (227)         |
| Pardalotidae  | Sericornithini  | Pycnoptilus     | floccosus       | Pair          | Australia | Resident  |        | 2 (227)         |
| Pardalotidae  | Sericornithini  | Origma          | solitaria       | Pair          | Australia | Resident  |        | 3 (227)         |
| Pardalotidae  | Sericornithini  | Oreoscopus      | gutturialis     | Pair          | Australia | Resident  |        | 2 (227)         |
| Pardalotidae  | Sericornithini  | Crateroscelis   | murina          | Unknown       | Australia | Resident  |        | 2 (87)          |
| Pardalotidae  | Sericornithini  | Crateroscelis   | nigrorufa       | Unknown       | Australia | Resident  |        | 2 (87)          |
| Pardalotidae  | Sericornithini  | Crateroscelis   | robusta         | Unknown       | Australia | Resident  |        | (87)            |
| Pardalotidae  | Sericornithini  | Sericornis      | citreogularis   | Pair          | Australia | Resident  |        | 2 (227)         |
| Pardalotidae  | Sericornithini  | Sericornis      | frontalis       | Cooperation   | Australia | Resident  |        | 3 (327, 328)    |
| Pardalotidae  | Sericornithini  | Sericornis      | humilis         | Suspected     | Australia | Resident  |        | 3 (227)         |
| Pardalotidae  | Sericornithini  | Sericornis      | keri            | Unknown       | Australia | Resident  |        | 2 (227)         |
| Pardalotidae  | Sericornithini  | Sericornis      | beccarii        | Suspected     | Australia | Resident  |        | 3 (363)         |
| Pardalotidae  | Sericornithini  | Sericornis      | virgatus        | Unknown       | Australia | Resident  |        | no source       |
| Pardalotidae  | Sericornithini  | Sericornis      | nouhuysi        | Suspected     | Australia | Resident  |        | 2 (363)         |
| Pardalotidae  | Sericornithini  | Sericornis      | magnirostris    | Cooperation   | Australia | Resident  |        | 3 (227)         |
| Pardalotidae  | Sericornithini  | Sericornis      | rufescens       | Unknown       | Australia | Resident  |        | no source       |
| Pardalotidae  | Sericornithini  | Sericornis      | perspicillatus  | Suspected     | Australia | Resident  |        | (363)           |
| Pardalotidae  | Sericornithini  | Sericornis      | arfakianus      | Unknown       | Australia | Resident  |        | (87)            |
| Pardalotidae  | Sericornithini  | Sericornis      | papuensis       | Suspected     | Australia | Resident  |        | 1 (363)         |
| Pardalotidae  | Sericornithini  | Sericornis      | spilodera       | Unknown       | Australia | Resident  |        | (87)            |
| Pardalotidae  | Sericornithini  | Acanthornis     | magnus          | Pair          | Australia | Resident  |        | 3 (227)         |
| Pardalotidae  | Sericornithini  | Pyrrholaemus    | brunneus        | Pair          | Australia | Resident  |        | 3 (227)         |
| Pardalotidae  | Sericornithini  | Chthonicola     | sagittatus      | Group         | Australia | Resident  |        | 3 (177)         |
| Pardalotidae  | Sericornithini  | Calamanthus     | campestris      | Pair          | Australia | Resident  |        | 3 (227)         |
| Pardalotidae  | Sericornithini  | Calamanthus     | fuliginosus     | Pair          | Australia | Resident  |        | 3 (227)         |
| Pardalotidae  | Sericornithini  | Hylacola        | pyrrhopygia     | Pair          | Australia | Resident  |        | 3 (227)         |
| Pardalotidae  | Sericornithini  | Hylacola        | cautus          | Pair          | Australia | Resident  |        | 3 (227)         |
| Pardalotidae  | Acanthizini     | Acanthiza       | murina          | Cooperation   | Australia | Resident  |        | (87)            |
| Pardalotidae  | Acanthizini     | Acanthiza       | katherina       | Cooperation   | Australia | Resident  |        | 2 J.A. Nicholls |
| (pers. comm.) |                 |                 |                 |               |           |           |        |                 |
| Pardalotidae  | Acanthizini     | Acanthiza       | pusilla         | Pair          | Australia | Resident  |        | 3 (195)         |
| Pardalotidae  | Acanthizini     | Acanthiza       | ewingii         | Pair          | Australia | Resident  |        | 3 (363)         |
| Pardalotidae  | Acanthizini     | Acanthiza       | reguloides      | Cooperation   | Australia | Resident  |        | 4 (227)         |
| Pardalotidae  | Acanthizini     | Acanthiza       | inornata        | Cooperation   | Australia | Resident  |        | 3 (227)         |
| Pardalotidae  | Acanthizini     | Acanthiza       | iredalei        | Cooperation   | Australia | Resident  |        | 3 (227)         |
| Pardalotidae  | Acanthizini     | Acanthiza       | chrysostris     | Cooperation   | Australia | Resident  |        | 3 (227)         |
| Pardalotidae  | Acanthizini     | Acanthiza       | uropygialis     | Cooperation   | Australia | Resident  |        | 3 (227)         |
| Pardalotidae  | Acanthizini     | Acanthiza       | nana            | Cooperation   | Australia | Resident  |        | 3 (227)         |
| Pardalotidae  | Acanthizini     | Acanthiza       | lineata         | Cooperation   | Australia | Resident  |        | 3 (227)         |
| Pardalotidae  | Acanthizini     | Acanthiza       | robustirostris  | Pair          | Australia | Resident  |        | 3 (363)         |
| Pardalotidae  | Acanthizini     | Smicromnis      | brevirostris    | Cooperation   | Australia | Resident  |        | 3 (227)         |
| Pardalotidae  | Acanthizini     | Gerygone        | cinerea         | Unknown       | Australia | Resident  |        | (87)            |

| Family                    | Clade Reference | Genus            | species          | Parental care | Region    | Movement  | Island  | Clutch       |
|---------------------------|-----------------|------------------|------------------|---------------|-----------|-----------|---------|--------------|
| Pardalotidae              | Acanthizini     | Gerygone         | chloronotus      | Unknown       | Australia | Resident  |         | 2 (227)      |
| Pardalotidae              | Acanthizini     | Gerygone         | palpebrosa       | Unknown       | Australia | Resident  |         | 2 (227)      |
| Pardalotidae              | Acanthizini     | Gerygone         | olivacea         | Pair          | Australia | Partial   |         | 3 (227)      |
| Pardalotidae              | Acanthizini     | Gerygone         | chrysogaster     | Suspected     | Australia | Resident  |         | 3 (87)       |
| Pardalotidae              | Acanthizini     | Gerygone         | magnirostris     | Pair          | Australia | Resident  |         | 2 (227)      |
| Pardalotidae              | Acanthizini     | Gerygone         | tenebrosa        | Unknown       | Australia | Resident  |         | 2 (227)      |
| Pardalotidae              | Acanthizini     | Gerygone         | sulphurea        | Unknown       | se Asia   | Resident  |         | 2 (271, 305) |
| Pardalotidae              | Acanthizini     | Gerygone         | inornata         | Unknown       | Australia | Resident  | Endemic | (88)         |
| Pardalotidae              | Acanthizini     | Gerygone         | dorsalis         | Pair          | Australia | Resident  |         | (88)         |
| Pardalotidae              | Acanthizini     | Gerygone         | ruficollis       | Unknown       | Australia | Resident  |         | (87)         |
| Pardalotidae              | Acanthizini     | Gerygone         | levigaster       | Pair          | Australia | Resident  |         | 2 (371)      |
| Pardalotidae              | Acanthizini     | Gerygone         | fusca            | Pair          | Australia | Partial   |         | 3 (227)      |
| Pardalotidae              | Acanthizini     | Gerygone         | insularis        | Unknown       | Australia | Resident  | Endemic | 3 (227)      |
| Pardalotidae              | Acanthizini     | Gerygone         | mouki            | Cooperation   | Australia | Resident  |         | 3 (321)      |
| Pardalotidae              | Acanthizini     | Gerygone         | modesta          | Unknown       | Australia | Resident  | Endemic | 3 (227)      |
| Pardalotidae              | Acanthizini     | Gerygone         | igata            | Pair          | Australia | Resident  |         | 4 (227)      |
| Pardalotidae              | Acanthizini     | Gerygone         | albofrontata     | Pair          | Australia | Resident  | Endemic | 3 (227)      |
| Pardalotidae              | Acanthizini     | Gerygone         | flavolateralis   | Pair          | Australia | Resident  | Endemic | 2 (219)      |
| Pardalotidae              | Acanthizini     | Aphelocephala    | leucopsis        | Cooperation   | Australia | Resident  |         | 3 (227)      |
| Pardalotidae              | Acanthizini     | Aphelocephala    | pectoralis       | Cooperation   | Australia | Resident  |         | 3 (227)      |
| Pardalotidae              | Acanthizini     | Aphelocephala    | nigricincta      | Suspected     | Australia | Resident  |         | 3 (227)      |
| Orthonychidae (pers comm) | Orthonychidae   | Orthonyx         | temminckii       | Uniparental   | Australia | Resident  |         | 2 Green, D.  |
| Orthonychidae             | Orthonychidae   | Orthonyx         | spaldingii       | Group         | Australia | Resident  |         | 1 (172, 259) |
| Pomatostomidae            | Pomatostomidae  | Pomatostomus     | isidorei         | Cooperation   | Australia | Resident  |         | (87)         |
| Pomatostomidae            | Pomatostomidae  | Pomatostomus     | temporalis       | Cooperation   | Australia | Resident  |         | 3 (227)      |
| Pomatostomidae            | Pomatostomidae  | Pomatostomus     | superciliosus    | Cooperation   | Australia | Resident  |         | 3 (227)      |
| Pomatostomidae            | Pomatostomidae  | Pomatostomus     | halli            | Cooperation   | Australia | Resident  |         | 2 (227)      |
| Pomatostomidae            | Pomatostomidae  | Pomatostomus     | ruficeps         | Cooperation   | Australia | Resident  |         | 4 (227)      |
| Petroicidae               | Petroicidae     | Amalocichla      | sclateriana      | Unknown       | Australia | Resident  |         | (87)         |
| Petroicidae               | Petroicidae     | Amalocichla      | incerta          | Unknown       | Australia | Resident  |         | 1 (87)       |
| Petroicidae               | Petroicidae     | Monachella       | muelleriana      | Unknown       | Australia | Resident  |         | 2 (87)       |
| Petroicidae               | Petroicidae     | Microeca         | fascinans        | Cooperation   | Australia | Partial   |         | 2 (227)      |
| Petroicidae               | Petroicidae     | Microeca         | hemixantha       | Unknown       | Australia | Resident  | Endemic | (46)         |
| Petroicidae               | Petroicidae     | Microeca         | flavigaster      | Suspected     | Australia | Resident  |         | 1 (227)      |
| Petroicidae               | Petroicidae     | Microeca         | griseocephala    | Unknown       | Australia | Resident  |         | 2 (227)      |
| Petroicidae               | Petroicidae     | Microeca         | flavovirescens   | Pair          | Australia | Resident  |         | 2 (87)       |
| Petroicidae               | Petroicidae     | Microeca         | papuana          | Unknown       | Australia | Resident  |         | (87)         |
| Petroicidae               | Petroicidae     | Eugerygone       | rubra            | Unknown       | Australia | Resident  |         | (87)         |
| Petroicidae               | Petroicidae     | Petroica         | bivittata        | Unknown       | Australia | Resident  |         | (87)         |
| Petroicidae               | Petroicidae     | Petroica         | archboldi        | Unknown       | Australia | Resident  |         | (92)         |
| Petroicidae               | Petroicidae     | Petroica         | multicolor       | Pair          | Australia | Resident  |         | 3 (227)      |
| Petroicidae               | Petroicidae     | Petroica         | macrocephala     | Pair          | Australia | Resident  |         | 4 (227)      |
| Petroicidae               | Petroicidae     | Petroica         | goodenovii       | Pair          | Australia | Resident  |         | 2 (227)      |
| Petroicidae               | Petroicidae     | Petroica         | phoenicea        | Occasional    | Australia | Migration |         | 3 (227)      |
| Petroicidae               | Petroicidae     | Petroica         | rosea            | Pair          | Australia | Migration |         | 2 (227)      |
| Petroicidae               | Petroicidae     | Petroica         | rodinogaster     | Pair          | Australia | Partial   |         | 3 (227)      |
| Petroicidae               | Petroicidae     | Petroica         | australis        | Pair          | Australia | Resident  |         | 3 (227)      |
| Petroicidae               | Petroicidae     | Petroica         | traversi         | Pair          | Australia | Resident  | Endemic | 2 (227)      |
| Petroicidae               | Petroicidae     | Melanodryas      | cucullata        | Cooperation   | Australia | Resident  |         | 2 (227)      |
| Petroicidae               | Petroicidae     | Melanodryas      | vittata          | Cooperation   | Australia | Resident  |         | 3 (227)      |
| Petroicidae               | Petroicidae     | Tregellasia      | leucops          | Unknown       | Australia | Resident  |         | 2 (227)      |
| Petroicidae               | Petroicidae     | Tregellasia      | capito           | Cooperation   | Australia | Resident  |         | 2 (227)      |
| Petroicidae               | Petroicidae     | Eopsaltria       | australis        | Cooperation   | Australia | Resident  |         | 2 (227)      |
| Petroicidae               | Petroicidae     | Eopsaltria       | griseogularis    | Cooperation   | Australia | Resident  |         | 2 (227)      |
| Petroicidae               | Petroicidae     | Eopsaltria       | flaviventris     | Unknown       | Australia | Resident  | Endemic | 2 (220)      |
| Petroicidae               | Petroicidae     | Eopsaltria       | georgiana        | Cooperation   | Australia | Resident  |         | 2 (227)      |
| Petroicidae               | Petroicidae     | Eopsaltria       | pulverulenta     | Unknown       | Australia | Resident  |         | 2 (227)      |
| Petroicidae               | Petroicidae     | Poecilodryas     | brachyura        | Unknown       | Australia | Resident  |         | (87)         |
| Petroicidae               | Petroicidae     | Poecilodryas     | hypoleuca        | Unknown       | Australia | Resident  |         | 1 (87)       |
| Petroicidae               | Petroicidae     | Poecilodryas     | superciliosa     | Pair          | Australia | Resident  |         | 2 (227)      |
| Petroicidae               | Petroicidae     | Poecilodryas     | placens          | Unknown       | Australia | Resident  |         | (87)         |
| Petroicidae               | Petroicidae     | Poecilodryas     | albonotata       | Unknown       | Australia | Resident  |         | (87)         |
| Petroicidae               | Petroicidae     | Peneothello      | sigillatus       | Unknown       | Australia | Resident  |         | 1 (87)       |
| Petroicidae               | Petroicidae     | Peneothello      | cryptoleucus     | Unknown       | Australia | Resident  |         | no source    |
| Petroicidae               | Petroicidae     | Peneothello      | cyaneus          | Unknown       | Australia | Resident  |         | 1 (87)       |
| Petroicidae               | Petroicidae     | Peneothello      | bimaculatus      | Unknown       | Australia | Resident  |         | (87)         |
| Petroicidae               | Petroicidae     | Heteromyias      | albispicularis   | Pair          | Australia | Resident  |         | 1 (227)      |
| Petroicidae               | Petroicidae     | Heteromyias      | cinereifrons     | Unknown       | Australia | Resident  |         | 1 (87)       |
| Petroicidae               | Petroicidae     | Pachycephalopsis | hattamensis      | Unknown       | Australia | Resident  |         | (87)         |
| Petroicidae               | Petroicidae     | Pachycephalopsis | pachycephalopsis | Unknown       | Australia | Resident  |         | 1 (87)       |
| Petroicidae               | Petroicidae     | Drymodes         | superciliaris    | Pair          | Australia | Resident  |         | 1 (227)      |
| Petroicidae               | Petroicidae     | Drymodes         | brunneopygia     | Unknown       | Australia | Resident  |         | 2 (227)      |

| Family           | Clade Reference  | Genus        | species        | Parental care | Region      | Movement  | Island  | Clutch     |
|------------------|------------------|--------------|----------------|---------------|-------------|-----------|---------|------------|
| Melanocharitidae | Melanocharitidae | Melanocharis | arfakiana      | Unknown       | Australia   | Resident  |         | (87)       |
| Melanocharitidae | Melanocharitidae | Melanocharis | nigra          | Pair          | Australia   | Resident  | 1       | (87)       |
| Melanocharitidae | Melanocharitidae | Melanocharis | longicauda     | Unknown       | Australia   | Resident  |         | (87)       |
| Melanocharitidae | Melanocharitidae | Melanocharis | versteri       | Unknown       | Australia   | Resident  |         | (87)       |
| Melanocharitidae | Melanocharitidae | Melanocharis | striativentris | Unknown       | Australia   | Resident  | 2       | (87)       |
| Melanocharitidae | Melanocharitidae | Melanocharis | crassirostris  | Unknown       | Australia   | Resident  |         | (87)       |
| Melanocharitidae | Melanocharitidae | Toxorhamphus | poliopterus    | Unknown       | Australia   | Resident  |         | (87)       |
| Melanocharitidae | Melanocharitidae | Toxorhamphus | novaeguineae   | Unknown       | Australia   | Resident  | 1       | (87)       |
| Melanocharitidae | Melanocharitidae | Toxorhamphus | iliolophus     | Unknown       | Australia   | Resident  | 1       | (87)       |
| Melanocharitidae | Melanocharitidae | Oedistoma    | pygmaeum       | Unknown       | Australia   | Resident  |         | (87)       |
| Laniidae         | Laniidae         | Lanius       | tigrinus       | Pair          | Palaearctic | Migration | 5       | (174, 223, |
| Laniidae         | Laniidae         | Lanius       | bucephalus     | Pair          | Palaearctic | Partial   | 6       | (174, 223, |
| Laniidae         | Laniidae         | Lanius       | collurio       | Occasional    | Palaearctic | Migration | 5       | (105)      |
| Laniidae         | Laniidae         | Lanius       | isabellinus    | Pair          | Palaearctic | Migration | 6       | (174, 223, |
| Laniidae         | Laniidae         | Lanius       | cristatus      | Pair          | Palaearctic | Migration | 6       | (174, 223, |
| Laniidae         | Laniidae         | Lanius       | collurioides   | Pair          | Palaearctic | Partial   | 5       | (174, 223, |
| Laniidae         | Laniidae         | Lanius       | gubernator     | Unknown       | Africa      | Resident  |         | (174, 223, |
| Laniidae         | Laniidae         | Lanius       | souzae         | Unknown       | Africa      | Partial   | 3       | (174, 223, |
| Laniidae         | Laniidae         | Lanius       | vittatus       | Pair          | se Asia     | Partial   | 4       | (174, 223, |
| Laniidae         | Laniidae         | Lanius       | schach         | Pair          | Palaearctic | Partial   | 5       | (174, 223, |
| Laniidae         | Laniidae         | Lanius       | tephronotus    | Pair          | Palaearctic | Partial   | 5       | (174, 223, |
| Laniidae         | Laniidae         | Lanius       | validirostris  | Unknown       | se Asia     | Resident  |         | (174, 223, |
| Laniidae         | Laniidae         | Lanius       | minor          | Pair          | Palaearctic | Migration | 6       | (174, 223, |
| Laniidae         | Laniidae         | Lanius       | ludovicianus   | Pair          | Nearctic    | Partial   | 5       | (174, 223, |
| Laniidae         | Laniidae         | Lanius       | excubitor      | Pair          | Palaearctic | Partial   | 6       | (174, 223, |
| Laniidae         | Laniidae         | Lanius       | sphenocercus   | Pair          | Palaearctic | Partial   | 7       | (174, 223, |
| Laniidae         | Laniidae         | Lanius       | excubitoroides | Cooperation   | Africa      | Resident  | 3       | (174, 223, |
| Laniidae         | Laniidae         | Lanius       | cabanisi       | Cooperation   | Africa      | Resident  | 3       | (174, 223, |
| Laniidae         | Laniidae         | Lanius       | dorsalis       | Unknown       | Africa      | Resident  |         | (174, 223, |
| Laniidae         | Laniidae         | Lanius       | somaticus      | Unknown       | Africa      | Resident  | 4       | (174, 223, |
| Laniidae         | Laniidae         | Lanius       | mackinnoni     | Unknown       | Africa      | Resident  | 2       | (174, 223, |
| Laniidae         | Laniidae         | Lanius       | collaris       | Pair          | Africa      | Resident  | 3       | (174, 223, |
| Laniidae         | Laniidae         | Lanius       | newtoni        | Unknown       | Africa      | Resident  | Endemic | (174, 223, |
| Laniidae         | Laniidae         | Lanius       | marwitzi       | Unknown       | Africa      | Resident  |         | (174, 223, |
| Laniidae         | Laniidae         | Lanius       | senator        | Pair          | Palaearctic | Migration | 6       | (174, 223, |
| Laniidae         | Laniidae         | Lanius       | nubicus        | Pair          | Palaearctic | Migration | 5       | (174, 223, |
| Laniidae         | Laniidae         | Corvinella   | corvina        | Cooperation   | Africa      | Resident  | 4       | (174, 223, |
| Laniidae         | Laniidae         | Corvinella   | melanoleuca    | Cooperation   | Africa      | Resident  | 3       | (174, 223, |
| Laniidae         | Laniidae         | Eurocephalus | rueppelli      | Cooperation   | Africa      | Resident  | 3       | (174, 223, |
| Laniidae         | Laniidae         | Eurocephalus | anguitimens    | Cooperation   | Africa      | Resident  | 3       | (174, 223, |
| Vireonidae       | Vireonidae       | Cyclarhis    | gujanensis     | Pair          | America     | Resident  | 2       | (466)      |
| Vireonidae       | Vireonidae       | Cyclarhis    | nigrirostris   | Unknown       | America     | Resident  |         | (235)      |
| Vireonidae       | Vireonidae       | Vireolanius  | melitophrys    | Unknown       | America     | Resident  |         | (239)      |
| Vireonidae       | Vireonidae       | Vireolanius  | pulchellus     | Unknown       | America     | Resident  | 2       | (466)      |

| Family     | Clade Reference  | Genus         | species         | Parental care | Region    | Movement  | Island  | Clutch     |
|------------|------------------|---------------|-----------------|---------------|-----------|-----------|---------|------------|
| Vireonidae | Vireonidae       | Vireolanius   | eximius         | Unknown       | America   | Resident  |         | (234, 235) |
| Vireonidae | Vireonidae       | Vireolanius   | leucotis        | Unknown       | America   | Resident  |         | (413)      |
| Vireonidae | Vireonidae       | Vireo         | brevipennis     | Unknown       | America   | Resident  |         | (239, 464) |
| Vireonidae | Vireonidae       | Vireo         | bellii          | Pair          | Nearctic  | Migration |         | (58)       |
| Vireonidae | Vireonidae       | Vireo         | atricapillus    | Pair          | Nearctic  | Migration | 4       | (206)      |
| Vireonidae | Vireonidae       | Vireo         | nelsoni         | Pair          | America   | Resident  |         | (239)      |
| Vireonidae | Vireonidae       | Vireo         | huttoni         | Pair          | Nearctic  | Migration | 4       | (114)      |
| Vireonidae | Vireonidae       | Vireo         | carmioli        | Unknown       | America   | Resident  |         | (413)      |
| Vireonidae | Vireonidae       | Vireo         | griseus         | Pair          | Nearctic  | Migration | 4       | (238)      |
| Vireonidae | Vireonidae       | Vireo         | pallens         | Unknown       | America   | Resident  | 2       | (466)      |
| Vireonidae | Vireonidae       | Vireo         | bairdi          | Unknown       | America   | Resident  | Endemic | (239)      |
| Vireonidae | Vireonidae       | Vireo         | gundlachi       | Pair          | America   | Resident  | Endemic | 3 (178)    |
| Vireonidae | Vireonidae       | Vireo         | crassirostris   | Unknown       | America   | Resident  | Endemic | (178)      |
| Vireonidae | Vireonidae       | Vireo         | caribaeus       | Pair          | America   | Resident  | Endemic | 2 (35)     |
| Vireonidae | Vireonidae       | Vireo         | vicinior        | Pair          | Nearctic  | Migration | 3       | (34)       |
| Vireonidae | Vireonidae       | Vireo         | hypochryseus    | Unknown       | America   | Resident  |         | (239)      |
| Vireonidae | Vireonidae       | Vireo         | modestus        | Unknown       | America   | Resident  | Endemic | 2 (406)    |
| Vireonidae | Vireonidae       | Vireo         | nanus           | Unknown       | America   | Resident  | Endemic | 2 (406)    |
| Vireonidae | Vireonidae       | Vireo         | latimeri        | Pair          | America   | Resident  | Endemic | (530)      |
| Vireonidae | Vireonidae       | Vireo         | osburni         | Unknown       | America   | Resident  | Endemic | (46)       |
| Vireonidae | Vireonidae       | Vireo         | cassinii        | Pair          | Nearctic  | Migration | 4       | (26)       |
| Vireonidae | Vireonidae       | Vireo         | plumbeus        | Pair          | Nearctic  | Migration | 4       | (111)      |
| Vireonidae | Vireonidae       | Vireo         | solitarius      | Pair          | Nearctic  | Migration | 4       | (258)      |
| Vireonidae | Vireonidae       | Vireo         | flavifrons      | Pair          | Nearctic  | Migration | 4       | (426)      |
| Vireonidae | Vireonidae       | Vireo         | philadelphicus  | Pair          | Nearctic  | Migration | 4       | (257)      |
| Vireonidae | Vireonidae       | Vireo         | olivaceus       | Pair          | Nearctic  | Partial   | 3       | (81)       |
| Vireonidae | Vireonidae       | Vireo         | flavoviridis    | Pair          | America   | Migration | 3       | (454)      |
| Vireonidae | Vireonidae       | Vireo         | gracilirostris  | Unknown       | America   | Resident  | Endemic | (376)      |
| Vireonidae | Vireonidae       | Vireo         | altiloquus      | Unknown       | America   | Partial   | Endemic | 2 (33)     |
| Vireonidae | Vireonidae       | Vireo         | magister        | Pair          | America   | Resident  |         | (239)      |
| Vireonidae | Vireonidae       | Vireo         | swainsonii      | Pair          | Nearctic  | Migration | 4       | (26)       |
| Vireonidae | Vireonidae       | Vireo         | gilvus          | Pair          | Nearctic  | Migration | 4       | (176)      |
| Vireonidae | Vireonidae       | Vireo         | leucophrys      | Unknown       | America   | Resident  |         | (466)      |
| Vireonidae | Vireonidae       | Hylophilus    | amaurocephalus  | Unknown       | America   | Resident  |         | (413)      |
| Vireonidae | Vireonidae       | Hylophilus    | poicilotis      | Pair          | America   | Resident  |         | (413)      |
| Vireonidae | Vireonidae       | Hylophilus    | thoracicus      | Unknown       | America   | Resident  |         | (234)      |
| Vireonidae | Vireonidae       | Hylophilus    | semicinereus    | Unknown       | America   | Resident  |         | (234)      |
| Vireonidae | Vireonidae       | Hylophilus    | pectoralis      | Unknown       | America   | Resident  | 2       | (234)      |
| Vireonidae | Vireonidae       | Hylophilus    | sclateri        | Unknown       | America   | Resident  |         | (234)      |
| Vireonidae | Vireonidae       | Hylophilus    | muscapinus      | Unknown       | America   | Resident  |         | (234)      |
| Vireonidae | Vireonidae       | Hylophilus    | brunneiceps     | Unknown       | America   | Resident  |         | (234)      |
| Vireonidae | Vireonidae       | Hylophilus    | hypoxanthus     | Unknown       | America   | Resident  |         | (234)      |
| Vireonidae | Vireonidae       | Hylophilus    | semibrunneus    | Unknown       | America   | Resident  |         | (234)      |
| Vireonidae | Vireonidae       | Hylophilus    | aurantiifrons   | Pair          | America   | Resident  | 3       | (151, 234) |
| Vireonidae | Vireonidae       | Hylophilus    | flavipes        | Pair          | America   | Resident  | 2       | (466)      |
| Vireonidae | Vireonidae       | Hylophilus    | olivaceus       | Unknown       | America   | Resident  |         | (413)      |
| Vireonidae | Vireonidae       | Hylophilus    | ochraceiceps    | Pair          | America   | Resident  | 2       | (454)      |
| Vireonidae | Vireonidae       | Hylophilus    | decurtatus      | Pair          | America   | Resident  | 2       | (454)      |
| Corvidae   | Cincolosomatinae | Androphobus   | viridis         | Unknown       | Australia | Resident  |         | (87)       |
| Corvidae   | Cincolosomatinae | Psophodes     | olivaceus       | Pair          | Australia | Resident  | 2       | (227)      |
| Corvidae   | Cincolosomatinae | Psophodes     | nigrogularis    | Pair          | Australia | Resident  | 2       | (227)      |
| Corvidae   | Cincolosomatinae | Psophodes     | occidentalis    | Pair          | Australia | Resident  | 2       | (227)      |
| Corvidae   | Cincolosomatinae | Psophodes     | cristatus       | Pair          | Australia | Resident  | 2       | (227)      |
| Corvidae   | Cincolosomatinae | Cincolosoma   | punctatum       | Pair          | Australia | Resident  | 2       | (227)      |
| Corvidae   | Cincolosomatinae | Cincolosoma   | castanotus      | Suspected     | Australia | Resident  | 2       | (227)      |
| Corvidae   | Cincolosomatinae | Cincolosoma   | castaneothorax  | Suspected     | Australia | Resident  | 2       | (227)      |
| Corvidae   | Cincolosomatinae | Cincolosoma   | cinnamomeum     | Suspected     | Australia | Resident  | 2       | (227)      |
| Corvidae   | Cincolosomatinae | Cincolosoma   | ajax            | Unknown       | Australia | Resident  |         | (87)       |
| Corvidae   | Cincolosomatinae | Ptilorrhoa    | leucosticta     | Pair          | Australia | Resident  |         | (87)       |
| Corvidae   | Cincolosomatinae | Ptilorrhoa    | caerulescens    | Unknown       | Australia | Resident  | 2       | (87)       |
| Corvidae   | Cincolosomatinae | Ptilorrhoa    | castanonota     | Unknown       | Australia | Resident  |         | (87)       |
| Corvidae   | Cincolosomatinae | Eupetes       | macrocerus      | Unknown       | se Asia   | Resident  | 2       | (425)      |
| Corvidae   | Cincolosomatinae | Ifrita        | kowaldi         | Unknown       | Australia | Resident  |         | (87)       |
| Corvidae   | Corcoracinae     | Corcorax      | melanorhamphos  | Cooperation   | Australia | Resident  |         | (225, 429) |
| Corvidae   | Corcoracinae     | Struthidea    | cinerea         | Cooperation   | Australia | Resident  |         | (30)       |
| Corvidae   | Neosittini       | Daphoenositta | chrysoptera     | Cooperation   | Australia | Resident  | 3       | (227)      |
| Corvidae   | Neosittini       | Daphoenositta | miranda         | Cooperation   | Australia | Resident  |         | (87)       |
| Corvidae   | Mohuini          | Mohoua        | albicilla       | Cooperation   | Australia | Resident  | 3       | (227)      |
| Corvidae   | Mohuini          | Mohoua        | ochrocephala    | Cooperation   | Australia | Resident  | 3       | (227)      |
| Corvidae   | Mohuini          | Mohoua        | novaeseelandiae | Cooperation   | Australia | Resident  | 3       | (227)      |
| Corvidae   | Falcunculini     | Falcunculus   | frontatus       | Cooperation   | Australia | Resident  | 2       | (227)      |
| Corvidae   | Falcunculini     | Oreoica       | gutturalis      | Pair          | Australia | Resident  | 3       | (227)      |
| Corvidae   | Falcunculini     | Rhagologus    | leucostigma     | Unknown       | Australia | Resident  |         | (83)       |



| Family   | Clade Reference | Genus         | species        | Parental care | Region    | Movement | Island  | Clutch       |
|----------|-----------------|---------------|----------------|---------------|-----------|----------|---------|--------------|
| Corvidae | Pachycephalini  | Pachycare     | flavogrisea    | Unknown       | Australia | Resident |         | 2 (87)       |
| Corvidae | Pachycephalini  | Hylocitrea    | bonensis       | Unknown       | Australia | Resident |         | (88)         |
| Corvidae | Pachycephalini  | Coracornis    | raveni         | Unknown       | Australia | Resident |         | (88)         |
| Corvidae | Pachycephalini  | Aleadryas     | rufinucha      | Unknown       | Australia | Resident |         | 2 (87)       |
| Corvidae | Pachycephalini  | Pachycephala  | olivacea       | Pair          | Australia | Partial  |         | 2 (227)      |
| Corvidae | Pachycephalini  | Pachycephala  | rufogularis    | Pair          | Australia | Resident |         | 2 (227)      |
| Corvidae | Pachycephalini  | Pachycephala  | inornata       | Pair          | Australia | Resident |         | 3 (227)      |
| Corvidae | Pachycephalini  | Pachycephala  | grisola        | Unknown       | se Asia   | Resident |         | (271)        |
| Corvidae | Pachycephalini  | Pachycephala  | albiventris    | Unknown       | se Asia   | Resident |         | (271)        |
| Corvidae | Pachycephalini  | Pachycephala  | homeyeri       | Unknown       | se Asia   | Resident |         | (271)        |
| Corvidae | Pachycephalini  | Pachycephala  | phaionotus     | Unknown       | Australia | Resident | Endemic | (88)         |
| Corvidae | Pachycephalini  | Pachycephala  | hyperythra     | Unknown       | Australia | Resident |         | 2 (87)       |
| Corvidae | Pachycephalini  | Pachycephala  | modesta        | Unknown       | Australia | Resident |         | (87)         |
| Corvidae | Pachycephalini  | Pachycephala  | hypoxantha     | Unknown       | se Asia   | Resident |         | (459)        |
| Corvidae | Pachycephalini  | Pachycephala  | sulfuriventer  | Unknown       | Australia | Resident |         | (88)         |
| Corvidae | Pachycephalini  | Pachycephala  | philippinensis | Unknown       | se Asia   | Resident |         | 2 (271)      |
| Corvidae | Pachycephalini  | Pachycephala  | meyeri         | Unknown       | Australia | Resident |         | no source    |
| Corvidae | Pachycephalini  | Pachycephala  | griseiceps     | Unknown       | Australia | Resident |         | (227)        |
| Corvidae | Pachycephalini  | Pachycephala  | simplex        | Unknown       | Australia | Resident |         | 2 (227)      |
| Corvidae | Pachycephalini  | Pachycephala  | orpheus        | Unknown       | Australia | Resident | Endemic | (88)         |
| Corvidae | Pachycephalini  | Pachycephala  | pectoralis     | Pair          | Australia | Partial  |         | 2 (227)      |
| Corvidae | Pachycephalini  | Pachycephala  | soror          | Unknown       | Australia | Resident |         | 1 (87)       |
| Corvidae | Pachycephalini  | Pachycephala  | lorentzi       | Unknown       | Australia | Resident |         | (87)         |
| Corvidae | Pachycephalini  | Pachycephala  | melanura       | Pair          | Australia | Resident |         | 2 (227)      |
| Corvidae | Pachycephalini  | Pachycephala  | caledonica     | Pair          | Australia | Resident | Endemic | 2 (220)      |
| Corvidae | Pachycephalini  | Pachycephala  | flavifrons     | Unknown       | Australia | Resident | Endemic | (508)        |
| Corvidae | Pachycephalini  | Pachycephala  | jacquinoti     | Unknown       | Australia | Resident | Endemic | 2 (508)      |
| Corvidae | Pachycephalini  | Pachycephala  | schlegelii     | Unknown       | Australia | Resident |         | (87)         |
| Corvidae | Pachycephalini  | Pachycephala  | nudigula       | Unknown       | Australia | Resident | Endemic | (88)         |
| Corvidae | Pachycephalini  | Pachycephala  | implicata      | Unknown       | Australia | Resident | Endemic | (87)         |
| Corvidae | Pachycephalini  | Pachycephala  | aurea          | Unknown       | Australia | Resident |         | (87)         |
| Corvidae | Pachycephalini  | Pachycephala  | griseonota     | Unknown       | Australia | Resident | Endemic | (88)         |
| Corvidae | Pachycephalini  | Pachycephala  | arctitorquis   | Unknown       | Australia | Resident | Endemic | (88)         |
| Corvidae | Pachycephalini  | Pachycephala  | monacha        | Unknown       | Australia | Resident |         | (87)         |
| Corvidae | Pachycephalini  | Pachycephala  | leucogastra    | Unknown       | Australia | Resident |         | (87)         |
| Corvidae | Pachycephalini  | Pachycephala  | rufiventris    | Pair          | Australia | Partial  |         | 2 (227)      |
| Corvidae | Pachycephalini  | Pachycephala  | lanioides      | Pair          | Australia | Resident |         | 2 (227)      |
| Corvidae | Pachycephalini  | Colluricincla | umbrina        | Unknown       | Australia | Resident |         | (87)         |
| Corvidae | Pachycephalini  | Colluricincla | megarhyncha    | Pair          | Australia | Resident |         | 2 (227)      |
| Corvidae | Pachycephalini  | Colluricincla | boweri         | Pair          | Australia | Partial  |         | 2 (227)      |
| Corvidae | Pachycephalini  | Colluricincla | woodwardi      | Unknown       | Australia | Resident |         | 2 (227)      |
| Corvidae | Pachycephalini  | Colluricincla | harmonica      | Pair          | Australia | Resident |         | 3 (227)      |
| Corvidae | Pachycephalini  | Colluricincla | tenebrosa      | Unknown       | Australia | Resident | Endemic | no source    |
| Corvidae | Pachycephalini  | Pitohui       | kirhocephalus  | Unknown       | Australia | Resident |         | (87)         |
| Corvidae | Pachycephalini  | Pitohui       | dichrous       | Cooperation   | Australia | Resident |         | (291)        |
| Corvidae | Pachycephalini  | Pitohui       | incertus       | Unknown       | Australia | Resident |         | (87)         |
| Corvidae | Pachycephalini  | Pitohui       | ferrugineus    | Suspected     | Australia | Resident |         | 1 (42)       |
| Corvidae | Pachycephalini  | Pitohui       | cristatus      | Unknown       | Australia | Resident |         | (87)         |
| Corvidae | Pachycephalini  | Pitohui       | nigrescens     | Unknown       | Australia | Resident |         | (87)         |
| Corvidae | Pachycephalini  | Eulacestoma   | nigropectus    | Unknown       | Australia | Resident |         | (87)         |
| Corvidae | Pachycephalini  | Turnagra      | capensis       | Unknown       | Australia | Resident |         | (422)        |
| Corvidae | Corvini         | Platylophus   | galericulatus  | Unknown       | se Asia   | Resident |         | 2 (326, 498) |
| Corvidae | Corvini         | Platysmurus   | leucopterus    | Pair          | se Asia   | Resident |         | 3 (326)      |
| Corvidae | Corvini         | Gymnorhinus   | cyanocephalus  | Cooperation   | Nearctic  | Resident |         | 3 (326)      |
| Corvidae | Corvini         | Cyanocitta    | cristata       | Occasional    | Nearctic  | Resident |         | 4 (479)      |
| Corvidae | Corvini         | Cyanocitta    | stelleri       | Pair          | Nearctic  | Resident |         | 4 (326)      |
| Corvidae | Corvini         | Aphelocoma    | insularis      | Pair          | Nearctic  | Resident | Endemic | (392)        |
| Corvidae | Corvini         | Aphelocoma    | californica    | Cooperation   | Nearctic  | Resident |         | (392)        |
| Corvidae | Corvini         | Aphelocoma    | coerulescens   | Cooperation   | Nearctic  | Resident |         | 3 (532)      |
| Corvidae | Corvini         | Aphelocoma    | ultramarina    | Cooperation   | America   | Resident |         | 4 (326)      |
| Corvidae | Corvini         | Aphelocoma    | unicolor       | Cooperation   | America   | Resident |         | 3 (511)      |
| Corvidae | Corvini         | Cyanolyca     | armillata      | Unknown       | America   | Resident |         | (234, 326)   |
| Corvidae | Corvini         | Cyanolyca     | turcosa        | Unknown       | America   | Resident |         | (326)        |
| Corvidae | Corvini         | Cyanolyca     | viridicyana    | Unknown       | America   | Resident |         | (326)        |
| Corvidae | Corvini         | Cyanolyca     | cucullata      | Unknown       | America   | Resident |         | (326)        |
| Corvidae | Corvini         | Cyanolyca     | pulchra        | Unknown       | America   | Resident |         | (326)        |
| Corvidae | Corvini         | Cyanolyca     | pumilo         | Unknown       | America   | Resident |         | (326)        |
| Corvidae | Corvini         | Cyanolyca     | nana           | Pair          | America   | Resident |         | 2 (326)      |
| Corvidae | Corvini         | Cyanolyca     | mirabilis      | Unknown       | America   | Resident |         | (326)        |
| Corvidae | Corvini         | Cyanolyca     | argentigula    | Unknown       | America   | Resident |         | (326)        |
| Corvidae | Corvini         | Cyanocorax    | melanocyaneus  | Cooperation   | America   | Resident |         | 3 (326)      |
| Corvidae | Corvini         | Cyanocorax    | sanblasianus   | Cooperation   | America   | Resident |         | 3 (326)      |
| Corvidae | Corvini         | Cyanocorax    | yucatanicus    | Cooperation   | America   | Resident |         | 5 (326)      |

| Family        | Clade Reference | Genus          | species        | Parental care | Region      | Movement | Island  | Clutch       |
|---------------|-----------------|----------------|----------------|---------------|-------------|----------|---------|--------------|
| Corvidae      | Corvini         | Cyanocorax     | beecheii       | Cooperation   | America     | Resident |         | 5 (326)      |
| Corvidae      | Corvini         | Cyanocorax     | cyanomelas     | Unknown       | America     | Resident |         | 3 (326)      |
| Corvidae      | Corvini         | Cyanocorax     | caeruleus      | Unknown       | America     | Resident |         | (326)        |
| Corvidae      | Corvini         | Cyanocorax     | violaceus      | Cooperation   | America     | Resident |         | 5 (326)      |
| Corvidae      | Corvini         | Cyanocorax     | crystalinus    | Cooperation   | America     | Resident |         | 3 (326)      |
| Corvidae      | Corvini         | Cyanocorax     | heilprini      | Unknown       | America     | Resident |         | (326)        |
| Corvidae      | Corvini         | Cyanocorax     | cayanus        | Cooperation   | America     | Resident |         | (234)        |
| Corvidae      | Corvini         | Cyanocorax     | affinis        | Cooperation   | America     | Resident |         | 4 (234, 326) |
| Corvidae      | Corvini         | Cyanocorax     | dickeyi        | Cooperation   | America     | Resident |         | 4 (326)      |
| Corvidae      | Corvini         | Cyanocorax     | chrysops       | Unknown       | America     | Resident |         | 4 (326)      |
| Corvidae      | Corvini         | Cyanocorax     | cyanopogon     | Unknown       | America     | Resident |         | (326)        |
| Corvidae      | Corvini         | Cyanocorax     | mystacalis     | Unknown       | America     | Resident |         | (326)        |
| Corvidae      | Corvini         | Cyanocorax     | yncas          | Cooperation   | America     | Resident |         | 4 (184)      |
| Corvidae      | Corvini         | Psilorhinus    | morio          | Cooperation   | America     | Resident |         | 3 (326)      |
| Corvidae      | Corvini         | Calocitta      | colliei        | Cooperation   | America     | Resident |         | (326)        |
| Corvidae      | Corvini         | Calocitta      | formosa        | Cooperation   | America     | Resident |         | 3 (283)      |
| Corvidae      | Corvini         | Garrulus       | glandarius     | Pair          | Palaearctic | Resident |         | 5 (326)      |
| Corvidae      | Corvini         | Garrulus       | lanceolatus    | Pair          | Palaearctic | Resident |         | 4 (326)      |
| Corvidae      | Corvini         | Garrulus       | lidhi          | Cooperation   | Palaearctic | Resident | Endemic | 4 (92, 251)  |
| Corvidae      | Corvini         | Perisoreus     | infaustus      | Group         | Palaearctic | Resident |         | 4 (140)      |
| Corvidae      | Corvini         | Perisoreus     | internigrans   | Cooperation   | Palaearctic | Resident |         | Sun Yue-Ha   |
| (pers. comm.) |                 |                |                |               |             |          |         |              |
| Corvidae      | Corvini         | Perisoreus     | canadensis     | Group         | Nearctic    | Resident |         | 4 (507)      |
| Corvidae      | Corvini         | Urocissa       | ornata         | Unknown       | se Asia     | Resident |         | 4 (92)       |
| Corvidae      | Corvini         | Urocissa       | caerulea       | Cooperation   | Palaearctic | Resident |         | 5 (444)      |
| Corvidae      | Corvini         | Urocissa       | flavirostris   | Unknown       | se Asia     | Resident |         | 3 (326)      |
| Corvidae      | Corvini         | Urocissa       | erythrorhyncha | Unknown       | se Asia     | Resident |         | 4 (326)      |
| Corvidae      | Corvini         | Urocissa       | whiteheadi     | Unknown       | se Asia     | Resident |         | (326)        |
| Corvidae      | Corvini         | Cissa          | chinensis      | Pair          | se Asia     | Resident |         | 5 (326)      |
| Corvidae      | Corvini         | Cissa          | hypoleuca      | Unknown       | se Asia     | Resident |         | (326)        |
| Corvidae      | Corvini         | Cissa          | thalassina     | Unknown       | se Asia     | Resident |         | (326)        |
| Corvidae      | Corvini         | Cyanopica      | cyana          | Cooperation   | Palaearctic | Resident |         | (326)        |
| Corvidae      | Corvini         | Dendrocitta    | vagabunda      | Pair          | se Asia     | Resident |         | 4 (326)      |
| Corvidae      | Corvini         | Dendrocitta    | formosae       | Pair          | se Asia     | Resident |         | 3 (326)      |
| Corvidae      | Corvini         | Dendrocitta    | occipitalis    | Unknown       | se Asia     | Resident |         | (326)        |
| Corvidae      | Corvini         | Dendrocitta    | leucogastra    | Pair          | se Asia     | Resident |         | 3 (326)      |
| Corvidae      | Corvini         | Dendrocitta    | frontalis      | Pair          | se Asia     | Resident |         | 3 (326)      |
| Corvidae      | Corvini         | Dendrocitta    | bayleyi        | Pair          | se Asia     | Resident | Endemic | 3 (326)      |
| Corvidae      | Corvini         | Crypsirina     | temia          | Pair          | se Asia     | Resident |         | 3 (326)      |
| Corvidae      | Corvini         | Crypsirina     | cucullata      | Unknown       | se Asia     | Resident |         | 3 (326)      |
| Corvidae      | Corvini         | Temnurus       | temnurus       | Unknown       | se Asia     | Resident |         | (326)        |
| Corvidae      | Corvini         | Pica           | pica           | Pair          | Holarctic   | Resident |         | 6 (326)      |
| Corvidae      | Corvini         | Pica           | nuttalli       | Pair          | Nearctic    | Resident |         | 6 (411)      |
| Corvidae      | Corvini         | Zavattariornis | stresemanni    | Cooperation   | Africa      | Resident |         | 6 (174)      |
| Corvidae      | Corvini         | Podoces        | hendersoni     | Unknown       | Palaearctic | Resident |         | (326)        |
| Corvidae      | Corvini         | Podoces        | biddulphi      | Unknown       | Palaearctic | Resident |         | 2 (326)      |
| Corvidae      | Corvini         | Podoces        | panderi        | Pair          | Palaearctic | Resident |         | 5 (326)      |
| Corvidae      | Corvini         | Podoces        | pleskei        | Unknown       | Palaearctic | Resident |         | 5 (326)      |
| Corvidae      | Corvini         | Pseudopodoces  | humilis        | Pair          | Palaearctic | Resident |         | 5 (326)      |
| Corvidae      | Corvini         | Nucifraga      | columbiana     | Pair          | Nearctic    | Resident |         | 3 (326)      |
| Corvidae      | Corvini         | Nucifraga      | caryocatactes  | Pair          | Palaearctic | Resident |         | 3 (326)      |
| Corvidae      | Corvini         | Pyrrhocorax    | pyrrhocorax    | Pair          | Palaearctic | Resident |         | 4 (326)      |
| Corvidae      | Corvini         | Pyrrhocorax    | graculus       | Pair          | Palaearctic | Resident |         | 4 (326)      |
| Corvidae      | Corvini         | Ptilostomus    | afer           | Cooperation   | Africa      | Resident |         | 5 (77, 228)  |
| Corvidae      | Corvini         | Corvus         | monedula       | Pair          | Palaearctic | Resident |         | 4 (326)      |
| Corvidae      | Corvini         | Corvus         | dauricus       | Pair          | Palaearctic | Resident |         | 5 (326)      |
| Corvidae      | Corvini         | Corvus         | splendens      | Pair          | se Asia     | Resident |         | 4 (326)      |
| Corvidae      | Corvini         | Corvus         | moneduloides   | Pair          | Australia   | Resident | Endemic | 2 (326)      |
| Corvidae      | Corvini         | Corvus         | enca           | Unknown       | se Asia     | Resident |         | 4 (326)      |
| Corvidae      | Corvini         | Corvus         | typicus        | Unknown       | se Asia     | Resident |         | (326)        |
| Corvidae      | Corvini         | Corvus         | unicolor       | Unknown       | se Asia     | Resident | Endemic | (326)        |
| Corvidae      | Corvini         | Corvus         | florensis      | Unknown       | se Asia     | Resident | Endemic | (326)        |
| Corvidae      | Corvini         | Corvus         | kubaryi        | Pair          | se Asia     | Resident | Endemic | (326)        |
| Corvidae      | Corvini         | Corvus         | validus        | Unknown       | se Asia     | Resident | Endemic | (326)        |
| Corvidae      | Corvini         | Corvus         | meeki          | Unknown       | Australia   | Resident | Endemic | (326)        |
| Corvidae      | Corvini         | Corvus         | woodfordi      | Unknown       | Australia   | Resident | Endemic | (326)        |
| Corvidae      | Corvini         | Corvus         | fuscicapillus  | Unknown       | Australia   | Resident |         | (326)        |
| Corvidae      | Corvini         | Corvus         | tristis        | Unknown       | Australia   | Resident |         | (326)        |
| Corvidae      | Corvini         | Corvus         | capensis       | Pair          | Africa      | Resident |         | 4 (326)      |
| Corvidae      | Corvini         | Corvus         | frugilegus     | Pair          | Palaearctic | Resident |         | (326)        |
| Corvidae      | Corvini         | Corvus         | caurinus       | Cooperation   | Nearctic    | Resident |         | 4 (503)      |
| Corvidae      | Corvini         | Corvus         | brachyrhynchus | Cooperation   | Nearctic    | Resident |         | 4 (326)      |
| Corvidae      | Corvini         | Corvus         | ossifragus     | Pair          | America     | Resident |         | 4 (326)      |

| Family   | Clade Reference | Genus        | species        | Parental care | Region      | Movement | Island    | Clutch |
|----------|-----------------|--------------|----------------|---------------|-------------|----------|-----------|--------|
| Corvidae | Corvini         | Corvus       | imparatus      | Unknown       | America     | Resident |           | (326)  |
| Corvidae | Corvini         | Corvus       | sinaloae       | Cooperation   | Nearctic    | Partial  | 4         | (337)  |
| Corvidae | Corvini         | Corvus       | palmarum       | Pair          | America     | Resident | Endemic 4 | (326)  |
| Corvidae | Corvini         | Corvus       | jamaicensis    | Unknown       | America     | Resident | Endemic 3 | (326)  |
| Corvidae | Corvini         | Corvus       | nasicus        | Unknown       | America     | Resident | Endemic 3 | (326)  |
| Corvidae | Corvini         | Corvus       | leucognaphalus | Unknown       | America     | Resident | Endemic 3 | (326)  |
| Corvidae | Corvini         | Corvus       | corone         | Cooperation   | Palaearctic | Resident | 4         | (25)   |
| Corvidae | Corvini         | Corvus       | macrorhynchos  | Pair          | Africa      | Resident | 5         | (326)  |
| Corvidae | Corvini         | Corvus       | levaillantii   | Pair          | se Asia     | Resident | 4         | (326)  |
| Corvidae | Corvini         | Corvus       | orru           | Pair          | Australia   | Resident | 3         | (326)  |
| Corvidae | Corvini         | Corvus       | bennetti       | Pair          | Australia   | Resident | 5         | (326)  |
| Corvidae | Corvini         | Corvus       | coronoides     | Pair          | Australia   | Resident | 4         | (326)  |
| Corvidae | Corvini         | Corvus       | mellori        | Pair          | Australia   | Resident | 4         | (326)  |
| Corvidae | Corvini         | Corvus       | boreus         | Pair          | Australia   | Resident | 4         | (326)  |
| Corvidae | Corvini         | Corvus       | tasmanicus     | Pair          | Australia   | Resident | 4         | (326)  |
| Corvidae | Corvini         | Corvus       | torquatus      | Pair          | Palaearctic | Resident | 3         | (326)  |
| Corvidae | Corvini         | Corvus       | hawaiiensis    | Pair          | Palaearctic | Resident | Endemic 5 | (326)  |
| Corvidae | Corvini         | Corvus       | cryptoleucus   | Pair          | America     | Resident | 6         | (326)  |
| Corvidae | Corvini         | Corvus       | albus          | Pair          | Africa      | Resident | 4         | (326)  |
| Corvidae | Corvini         | Corvus       | ruficollis     | Pair          | Palaearctic | Resident | 4         | (326)  |
| Corvidae | Corvini         | Corvus       | corax          | Pair          | Palaearctic | Resident | 5         | (326)  |
| Corvidae | Corvini         | Corvus       | hipidurus      | Pair          | Palaearctic | Resident | 5         | (326)  |
| Corvidae | Corvini         | Corvus       | albicollis     | Pair          | Africa      | Resident | 4         | (326)  |
| Corvidae | Corvini         | Corvus       | crassirostris  | Pair          | Africa      | Resident | 4         | (326)  |
| Corvidae | Paradisaeini    | Melampitta   | lugubris       | Pair          | Australia   | Resident | 1         | (170)  |
| Corvidae | Paradisaeini    | Melampitta   | gigantea       | Unknown       | Australia   | Resident |           | (87)   |
| Corvidae | Paradisaeini    | Lycocorax    | pyrrhopterus   | Unknown       | Australia   | Resident | Endemic 1 | (168)  |
| Corvidae | Paradisaeini    | Manucodia    | atra           | Pair          | Australia   | Resident | 2         | (168)  |
| Corvidae | Paradisaeini    | Manucodia    | chalybata      | Pair          | Australia   | Resident | 1         | (168)  |
| Corvidae | Paradisaeini    | Manucodia    | comrii         | Unknown       | Australia   | Resident | 2         | (168)  |
| Corvidae | Paradisaeini    | Manucodia    | jobiensis      | Unknown       | Australia   | Resident | 2         | (168)  |
| Corvidae | Paradisaeini    | Manucodia    | keraudrenii    | Pair          | Australia   | Resident | 1         | (168)  |
| Corvidae | Paradisaeini    | Semioptera   | wallacii       | Uniparental   | Australia   | Resident | Endemic 1 | (168)  |
| Corvidae | Paradisaeini    | Paradigalla  | carunculata    | Unknown       | Australia   | Resident |           | (168)  |
| Corvidae | Paradisaeini    | Paradigalla  | brevicauda     | Uniparental   | Australia   | Resident | 1         | (168)  |
| Corvidae | Paradisaeini    | Epimachus    | fastuosus      | Uniparental   | Australia   | Resident |           | (168)  |
| Corvidae | Paradisaeini    | Epimachus    | meyeri         | Uniparental   | Australia   | Resident | 1         | (168)  |
| Corvidae | Paradisaeini    | Epimachus    | albertisi      | Uniparental   | Australia   | Resident | 1         | (168)  |
| Corvidae | Paradisaeini    | Epimachus    | bruijnii       | Uniparental   | Australia   | Resident |           | (168)  |
| Corvidae | Paradisaeini    | Lophorina    | superba        | Uniparental   | Australia   | Resident | 2         | (168)  |
| Corvidae | Paradisaeini    | Parotia      | sefilata       | Uniparental   | Australia   | Resident |           | (168)  |
| Corvidae | Paradisaeini    | Parotia      | carolae        | Uniparental   | Australia   | Resident |           | (168)  |
| Corvidae | Paradisaeini    | Parotia      | lawesii        | Uniparental   | Australia   | Resident | 1         | (168)  |
| Corvidae | Paradisaeini    | Parotia      | helenae        | Unknown       | Australia   | Resident |           | (168)  |
| Corvidae | Paradisaeini    | Parotia      | wahnesi        | Uniparental   | Australia   | Resident | 2         | (168)  |
| Corvidae | Paradisaeini    | Ptiloris     | magnificus     | Uniparental   | Australia   | Resident | 2         | (168)  |
| Corvidae | Paradisaeini    | Ptiloris     | intercedens    | Unknown       | Australia   | Resident |           | (168)  |
| Corvidae | Paradisaeini    | Ptiloris     | victoriae      | Uniparental   | Australia   | Resident | 2         | (168)  |
| Corvidae | Paradisaeini    | Ptiloris     | paradiseus     | Uniparental   | Australia   | Resident | 2         | (168)  |
| Corvidae | Paradisaeini    | Cicinnurus   | magnificus     | Uniparental   | Australia   | Resident | 2         | (168)  |
| Corvidae | Paradisaeini    | Cicinnurus   | respublica     | Uniparental   | Australia   | Resident | Endemic   | (168)  |
| Corvidae | Paradisaeini    | Cicinnurus   | regius         | Uniparental   | Australia   | Resident | 2         | (168)  |
| Corvidae | Paradisaeini    | Astrapia     | nigra          | Unknown       | Australia   | Resident |           | (168)  |
| Corvidae | Paradisaeini    | Astrapia     | splendidissima | Uniparental   | Australia   | Resident |           | (168)  |
| Corvidae | Paradisaeini    | Astrapia     | mayeri         | Uniparental   | Australia   | Resident | 1         | (168)  |
| Corvidae | Paradisaeini    | Astrapia     | stephaniae     | Uniparental   | Australia   | Resident | 1         | (168)  |
| Corvidae | Paradisaeini    | Astrapia     | rothschildi    | Uniparental   | Australia   | Resident | 1         | (168)  |
| Corvidae | Paradisaeini    | Pteridophora | alberti        | Uniparental   | Australia   | Resident | 1         | (168)  |
| Corvidae | Paradisaeini    | Seleucidis   | melanoleuca    | Uniparental   | Australia   | Resident | 1         | (168)  |
| Corvidae | Paradisaeini    | Paradisaea   | rubra          | Uniparental   | Australia   | Resident | Endemic 1 | (168)  |
| Corvidae | Paradisaeini    | Paradisaea   | minor          | Uniparental   | Australia   | Resident | 1         | (168)  |
| Corvidae | Paradisaeini    | Paradisaea   | apoda          | Uniparental   | Australia   | Resident | 1         | (168)  |
| Corvidae | Paradisaeini    | Paradisaea   | raggiana       | Uniparental   | Australia   | Resident | 2         | (168)  |
| Corvidae | Paradisaeini    | Paradisaea   | decora         | Uniparental   | Australia   | Resident |           | (168)  |
| Corvidae | Paradisaeini    | Paradisaea   | guilielmi      | Uniparental   | Australia   | Resident | 1         | (168)  |
| Corvidae | Paradisaeini    | Paradisaea   | rudolphi       | Uniparental   | Australia   | Resident | 1         | (168)  |
| Corvidae | Artamini        | Cracticus    | mentalis       | Unknown       | Australia   | Resident | 3         | (87)   |
| Corvidae | Artamini        | Cracticus    | torquatus      | Cooperation   | Australia   | Resident | 4         | (428)  |
| Corvidae | Artamini        | Cracticus    | cassicus       | Cooperation   | Australia   | Resident |           | (87)   |
| Corvidae | Artamini        | Cracticus    | louisianensis  | Unknown       | Australia   | Resident | Endemic   | (87)   |
| Corvidae | Artamini        | Cracticus    | nigrogularis   | Cooperation   | Australia   | Resident | 4         | (428)  |
| Corvidae | Artamini        | Cracticus    | quoyi          | Pair          | Australia   | Resident | 3         | (470)  |
| Corvidae | Artamini        | Gymnorhina   | tibicen        | Cooperation   | Australia   | Resident | 4         | (154)  |

| Family   | Clade Reference | Genus        | species         | Parental care | Region      | Movement  | Island  | Clutch      |
|----------|-----------------|--------------|-----------------|---------------|-------------|-----------|---------|-------------|
| Corvidae | Artamini        | Strepera     | graculina       | Pair          | Australia   | Partial   |         | 3 (470)     |
| Corvidae | Artamini        | Strepera     | fuliginosa      | Pair          | Australia   | Resident  |         | 3 (470)     |
| Corvidae | Artamini        | Strepera     | versicolor      | Pair          | Australia   | Resident  |         | 2 (470)     |
| Corvidae | Artamini        | Artamus      | fuscus          | Unknown       | se Asia     | Partial   |         | 2 (6)       |
| Corvidae | Artamini        | Artamus      | leucorynchus    | Cooperation   | Australia   | Partial   |         | 3 (87, 428) |
| Corvidae | Artamini        | Artamus      | monachus        | Unknown       | Australia   | Resident  |         | (88)        |
| Corvidae | Artamini        | Artamus      | maximus         | Cooperation   | Australia   | Resident  |         | (87)        |
| Corvidae | Artamini        | Artamus      | insignis        | Unknown       | Australia   | Resident  | Endemic | (87)        |
| Corvidae | Artamini        | Artamus      | mentalis        | Cooperation   | Australia   | Resident  | Endemic | (86)        |
| Corvidae | Artamini        | Artamus      | personatus      | Pair          | Australia   | Partial   |         | 2 (470)     |
| Corvidae | Artamini        | Artamus      | supercilliosus  | Pair          | Australia   | Nomadic   |         | 2 (470)     |
| Corvidae | Artamini        | Artamus      | cinereus        | Cooperation   | Australia   | Nomadic   |         | 3 (430)     |
| Corvidae | Artamini        | Artamus      | cyanopterus     | Cooperation   | Australia   | Nomadic   |         | 3 (431)     |
| Corvidae | Artamini        | Artamus      | minor           | Cooperation   | Australia   | Nomadic   |         | 2 (428)     |
| Corvidae | Artamini        | Pityriasis   | gymnocephala    | Suspected     | se Asia     | Resident  |         | (459, 525)  |
| Corvidae | Artamini        | Peltops      | blainvillii     | Unknown       | Australia   | Resident  |         | (87)        |
| Corvidae | Artamini        | Peltops      | montanus        | Unknown       | Australia   | Resident  |         | (87)        |
| Corvidae | Oriolini        | Oriolus      | melanotis       | Unknown       | Australia   | Resident  | Endemic | (88)        |
| Corvidae | Oriolini        | Oriolus      | bouroensis      | Unknown       | Australia   | Resident  | Endemic | (88)        |
| Corvidae | Oriolini        | Oriolus      | forsteni        | Unknown       | Australia   | Resident  | Endemic | (88)        |
| Corvidae | Oriolini        | Oriolus      | phaeochromus    | Unknown       | Australia   | Resident  | Endemic | (88)        |
| Corvidae | Oriolini        | Oriolus      | szalayi         | Pair          | Australia   | Resident  |         | 1 (87)      |
| Corvidae | Oriolini        | Oriolus      | sagittatus      | Pair          | Australia   | Partial   |         | 3 (470)     |
| Corvidae | Oriolini        | Oriolus      | flavocinctus    | Pair          | Australia   | Nomadic   |         | 2 (470)     |
| Corvidae | Oriolini        | Oriolus      | xanthonotus     | Unknown       | se Asia     | Resident  |         | (271)       |
| Corvidae | Oriolini        | Oriolus      | steerii         | Unknown       | se Asia     | Resident  |         | (271)       |
| Corvidae | Oriolini        | Oriolus      | albiloris       | Unknown       | se Asia     | Resident  |         | (271)       |
| Corvidae | Oriolini        | Oriolus      | isabellae       | Unknown       | se Asia     | Resident  |         | (92)        |
| Corvidae | Oriolini        | Oriolus      | oriolus         | Occasional    | Palaearctic | Migration |         | 4 (105)     |
| Corvidae | Oriolini        | Oriolus      | auratus         | Pair          | Africa      | Partial   |         | 2 (174)     |
| Corvidae | Oriolini        | Oriolus      | chinensis       | Pair          | Palaearctic | Migration |         | 3 (7)       |
| Corvidae | Oriolini        | Oriolus      | tenuirostris    | Unknown       | Palaearctic | Migration |         | (7)         |
| Corvidae | Oriolini        | Oriolus      | chlorocephalus  | Unknown       | Africa      | Resident  | Endemic | (174)       |
| Corvidae | Oriolini        | Oriolus      | crassirostris   | Unknown       | Africa      | Resident  | Endemic | (174)       |
| Corvidae | Oriolini        | Oriolus      | brachyrhynchus  | Pair          | Africa      | Resident  |         | 2 (174)     |
| Corvidae | Oriolini        | Oriolus      | monacha         | Unknown       | Africa      | Resident  |         | (174)       |
| Corvidae | Oriolini        | Oriolus      | larvatus        | Pair          | Africa      | Resident  |         | (174)       |
| Corvidae | Oriolini        | Oriolus      | percivali       | Unknown       | Africa      | Resident  |         | (174)       |
| Corvidae | Oriolini        | Oriolus      | nigripennis     | Unknown       | Africa      | Resident  |         | (174)       |
| Corvidae | Oriolini        | Oriolus      | xanthornus      | Pair          | se Asia     | Migration |         | 3 (6)       |
| Corvidae | Oriolini        | Oriolus      | hosii           | Unknown       | se Asia     | Resident  |         | (459)       |
| Corvidae | Oriolini        | Oriolus      | cruentus        | Unknown       | se Asia     | Resident  |         | (459)       |
| Corvidae | Oriolini        | Oriolus      | traillii        | Pair          | se Asia     | Resident  |         | 2 (6)       |
| Corvidae | Oriolini        | Oriolus      | mellianus       | Unknown       | se Asia     | Migration |         | (92)        |
| Corvidae | Oriolini        | Sphecotheres | hypoleucus      | Unknown       | Australia   | Resident  | Endemic | (88)        |
| Corvidae | Oriolini        | Sphecotheres | viridis         | Cooperation   | Australia   | Nomadic   |         | 3 (528)     |
| Corvidae | Oriolini        | Coracina     | maxima          | Cooperation   | Australia   | Nomadic   |         | (428)       |
| Corvidae | Oriolini        | Coracina     | larvata         | Unknown       | se Asia     | Resident  |         | (319)       |
| Corvidae | Oriolini        | Coracina     | macei           | Unknown       | se Asia     | Partial   |         | 3 (5)       |
| Corvidae | Oriolini        | Coracina     | javensis        | Unknown       | se Asia     | Resident  |         | (319)       |
| Corvidae | Oriolini        | Coracina     | schistacea      | Unknown       | Australia   | Resident  | Endemic | (88)        |
| Corvidae | Oriolini        | Coracina     | personata       | Unknown       | Australia   | Resident  | Endemic | (88)        |
| Corvidae | Oriolini        | Coracina     | atriceps        | Unknown       | Australia   | Resident  | Endemic | (88)        |
| Corvidae | Oriolini        | Coracina     | fortis          | Unknown       | Australia   | Resident  | Endemic | (46)        |
| Corvidae | Oriolini        | Coracina     | caledonica      | Pair          | Australia   | Resident  | Endemic | 2 (53)      |
| Corvidae | Oriolini        | Coracina     | novaehollandiae | Pair          | Widespread  | Partial   |         | 2 (469)     |
| Corvidae | Oriolini        | Coracina     | caeruleogrisea  | Unknown       | Australia   | Resident  |         | (87)        |
| Corvidae | Oriolini        | Coracina     | temminckii      | Unknown       | Australia   | Resident  |         | (88)        |
| Corvidae | Oriolini        | Coracina     | striata         | Unknown       | se Asia     | Resident  |         | 2 (305)     |
| Corvidae | Oriolini        | Coracina     | bicolor         | Unknown       | Australia   | Resident  |         | (88)        |
| Corvidae | Oriolini        | Coracina     | lineata         | Unknown       | Australia   | Resident  |         | 2 (87)      |
| Corvidae | Oriolini        | Coracina     | boyeri          | Unknown       | Australia   | Resident  |         | 2 (87)      |
| Corvidae | Oriolini        | Coracina     | leucopygia      | Unknown       | Australia   | Resident  |         | (88)        |
| Corvidae | Oriolini        | Coracina     | papuensis       | Unknown       | Australia   | Resident  |         | 2 (87)      |
| Corvidae | Oriolini        | Coracina     | longicauda      | Unknown       | Australia   | Resident  |         | 1 (87)      |
| Corvidae | Oriolini        | Coracina     | parvula         | Unknown       | Australia   | Resident  | Endemic | (88)        |
| Corvidae | Oriolini        | Coracina     | abbotti         | Unknown       | Australia   | Resident  |         | (88)        |
| Corvidae | Oriolini        | Coracina     | analis          | Unknown       | Australia   | Resident  | Endemic | no source   |
| Corvidae | Oriolini        | Coracina     | pectoralis      | Pair          | Africa      | Resident  |         | 2 (269)     |
| Corvidae | Oriolini        | Coracina     | caesia          | Pair          | Africa      | Partial   |         | 1 (269)     |
| Corvidae | Oriolini        | Coracina     | azurea          | Unknown       | Africa      | Resident  |         | (269)       |
| Corvidae | Oriolini        | Coracina     | graueri         | Unknown       | Africa      | Resident  |         | (269)       |
| Corvidae | Oriolini        | Coracina     | cinerea         | Unknown       | Africa      | Resident  |         | (284)       |

| Family   | Clade Reference | Genus        | species          | Parental care | Region     | Movement    | Island  | Clutch      |
|----------|-----------------|--------------|------------------|---------------|------------|-------------|---------|-------------|
| Corvidae | Oriolini        | Coracina     | typica           | Pair          | Africa     | Resident    | Endemic | 2 (69, 433) |
| Corvidae | Oriolini        | Coracina     | newtoni          | Pair          | Africa     | Resident    | Endemic | 2 (484)     |
| Corvidae | Oriolini        | Coracina     | coerulescens     | Unknown       | se Asia    | Resident    |         | (271)       |
| Corvidae | Oriolini        | Coracina     | tenuirostris     | Pair          | Australia  | Partial     |         | 1 (87)      |
| Corvidae | Oriolini        | Coracina     | dohertyi         | Unknown       | Australia  | Resident    | Endemic | (88)        |
| Corvidae | Oriolini        | Coracina     | sula             | Unknown       | Australia  | Resident    |         | (88)        |
| Corvidae | Oriolini        | Coracina     | dispar           | Unknown       | Australia  | Resident    | Endemic | (88)        |
| Corvidae | Oriolini        | Coracina     | mindanensis      | Unknown       | se Asia    | Resident    |         | (271)       |
| Corvidae | Oriolini        | Coracina     | morio            | Unknown       | Australia  | Resident    |         | (88)        |
| Corvidae | Oriolini        | Coracina     | ceramensis       | Unknown       | Australia  | Resident    | Endemic | (88)        |
| Corvidae | Oriolini        | Coracina     | incerta          | Unknown       | Australia  | Resident    |         | (87)        |
| Corvidae | Oriolini        | Coracina     | schisticeps      | Unknown       | Australia  | Resident    |         | (87)        |
| Corvidae | Oriolini        | Coracina     | melas            | Unknown       | Australia  | Resident    |         | (87)        |
| Corvidae | Oriolini        | Coracina     | montana          | Unknown       | Australia  | Resident    |         | (87)        |
| Corvidae | Oriolini        | Coracina     | holopolia        | Unknown       | Australia  | Resident    | Endemic | (87)        |
| Corvidae | Oriolini        | Coracina     | mcgregori        | Unknown       | se Asia    | Resident    |         | (271)       |
| Corvidae | Oriolini        | Coracina     | ostenta          | Unknown       | se Asia    | Resident    |         | 3 (92)      |
| Corvidae | Oriolini        | Coracina     | polioptera       | Unknown       | se Asia    | Resident    |         | 2 (425)     |
| Corvidae | Oriolini        | Coracina     | melaschistos     | Unknown       | se Asia    | Altitudinal |         | 3 (5)       |
| Corvidae | Oriolini        | Coracina     | fimbriata        | Unknown       | se Asia    | Resident    |         | (319)       |
| Corvidae | Oriolini        | Coracina     | melanoptera      | Pair          | se Asia    | Partial     |         | 2 (5)       |
| Corvidae | Oriolini        | Campochaera  | sloetii          | Unknown       | Australia  | Resident    |         | (41, 87)    |
| Corvidae | Oriolini        | Lalage       | melanoleuca      | Unknown       | se Asia    | Resident    |         | (271)       |
| Corvidae | Oriolini        | Lalage       | nigra            | Unknown       | se Asia    | Resident    |         | (271)       |
| Corvidae | Oriolini        | Lalage       | leucopygialis    | Unknown       | Australia  | Resident    |         | (88)        |
| Corvidae | Oriolini        | Lalage       | sueurii          | Unknown       | Australia  | Resident    |         | (88)        |
| Corvidae | Oriolini        | Lalage       | tricolor         | Pair          | Australia  | Migration   |         | 2 (469)     |
| Corvidae | Oriolini        | Lalage       | aurea            | Unknown       | Australia  | Resident    | Endemic | (88)        |
| Corvidae | Oriolini        | Lalage       | moesta           | Unknown       | Australia  | Resident    | Endemic | (88)        |
| Corvidae | Oriolini        | Lalage       | atrovirens       | Unknown       | Australia  | Resident    |         | (87)        |
| Corvidae | Oriolini        | Lalage       | leucomela        | Pair          | Australia  | Resident    |         | 1 (469)     |
| Corvidae | Oriolini        | Lalage       | maculosa         | Unknown       | Australia  | Resident    | Endemic | 1 (508)     |
| Corvidae | Oriolini        | Lalage       | sharpei          | Unknown       | Australia  | Resident    | Endemic | 1 (508)     |
| Corvidae | Oriolini        | Lalage       | leucopyga        | Unknown       | Australia  | Resident    | Endemic | 2 (53)      |
| Corvidae | Oriolini        | Campephaga   | petiti           | Unknown       | Africa     | Resident    |         | (269)       |
| Corvidae | Oriolini        | Campephaga   | flava            | Pair          | Africa     | Partial     |         | 2 (269)     |
| Corvidae | Oriolini        | Campephaga   | phoenicea        | Pair          | Africa     | Partial     |         | 2 (269)     |
| Corvidae | Oriolini        | Campephaga   | quiscalina       | Pair          | Africa     | Resident    |         | 2 (269)     |
| Corvidae | Oriolini        | Campephaga   | lobata           | Unknown       | Africa     | Resident    |         | (269)       |
| Corvidae | Oriolini        | Campephaga   | oriolina         | Unknown       | Africa     | Resident    |         | (269)       |
| Corvidae | Oriolini        | Pericrocotus | roseus           | Unknown       | Palearctic | Altitudinal |         | 3 (5)       |
| Corvidae | Oriolini        | Pericrocotus | cantonensis      | Unknown       | Palearctic | Migration   |         | (320)       |
| Corvidae | Oriolini        | Pericrocotus | divaricatus      | Pair          | Palearctic | Migration   |         | 4 (52)      |
| Corvidae | Oriolini        | Pericrocotus | tegimae          | Unknown       | Palearctic | Resident    |         | 4 (52)      |
| Corvidae | Oriolini        | Pericrocotus | cinnamomeus      | Cooperation   | se Asia    | Resident    |         | 3 (410)     |
| Corvidae | Oriolini        | Pericrocotus | igneus           | Unknown       | se Asia    | Resident    |         | (46)        |
| Corvidae | Oriolini        | Pericrocotus | lansbergei       | Unknown       | Australia  | Resident    | Endemic | (88)        |
| Corvidae | Oriolini        | Pericrocotus | erythropterygius | Pair          | se Asia    | Resident    |         | 3 (5)       |
| Corvidae | Oriolini        | Pericrocotus | solaris          | Unknown       | se Asia    | Resident    |         | 3 (5)       |
| Corvidae | Oriolini        | Pericrocotus | ethologus        | Pair          | Palearctic | Altitudinal |         | 3 (5)       |
| Corvidae | Oriolini        | Pericrocotus | brevirostris     | Unknown       | se Asia    | Altitudinal |         | (5)         |
| Corvidae | Oriolini        | Pericrocotus | miniatus         | Unknown       | se Asia    | Resident    |         | (319)       |
| Corvidae | Oriolini        | Pericrocotus | flammeus         | Pair          | se Asia    | Partial     |         | 2 (5)       |
| Corvidae | Oriolini        | Hemipus      | picatus          | Pair          | se Asia    | Resident    |         | 2 (5)       |
| Corvidae | Oriolini        | Hemipus      | hirundinaceus    | Pair          | se Asia    | Resident    |         | 2 (459)     |
| Corvidae | Rhipidurini     | Rhipidura    | hypoxantha       | Pair          | Palearctic | Altitudinal |         | 3 (7)       |
| Corvidae | Rhipidurini     | Rhipidura    | superciliaris    | Unknown       | se Asia    | Resident    |         | (271)       |
| Corvidae | Rhipidurini     | Rhipidura    | cyaniceps        | Unknown       | se Asia    | Resident    |         | 2 (271)     |
| Corvidae | Rhipidurini     | Rhipidura    | phoenicura       | Unknown       | se Asia    | Resident    |         | no source   |
| Corvidae | Rhipidurini     | Rhipidura    | nigrocinnamomea  | Unknown       | se Asia    | Resident    |         | (271)       |
| Corvidae | Rhipidurini     | Rhipidura    | albicollis       | Pair          | se Asia    | Resident    |         | 3 (7)       |
| Corvidae | Rhipidurini     | Rhipidura    | euryura          | Unknown       | se Asia    | Resident    |         | no source   |
| Corvidae | Rhipidurini     | Rhipidura    | aureola          | Pair          | se Asia    | Resident    |         | 3 (7)       |
| Corvidae | Rhipidurini     | Rhipidura    | javanica         | Pair          | se Asia    | Resident    |         | 2 (271)     |
| Corvidae | Rhipidurini     | Rhipidura    | perlata          | Unknown       | se Asia    | Resident    |         | (459)       |
| Corvidae | Rhipidurini     | Rhipidura    | leucophrys       | Pair          | Australia  | Resident    |         | 3 (49)      |
| Corvidae | Rhipidurini     | Rhipidura    | diluta           | Unknown       | Australia  | Resident    | Endemic | (88)        |
| Corvidae | Rhipidurini     | Rhipidura    | rufiventris      | Pair          | Australia  | Resident    |         | 1 (49)      |
| Corvidae | Rhipidurini     | Rhipidura    | fuscorufa        | Unknown       | Australia  | Resident    | Endemic | (46)        |
| Corvidae | Rhipidurini     | Rhipidura    | cockerelli       | Unknown       | Australia  | Resident    | Endemic | (87)        |
| Corvidae | Rhipidurini     | Rhipidura    | threothorax      | Unknown       | Australia  | Resident    |         | (87)        |
| Corvidae | Rhipidurini     | Rhipidura    | maculipectus     | Unknown       | Australia  | Resident    |         | (87)        |
| Corvidae | Rhipidurini     | Rhipidura    | leucothorax      | Pair          | Australia  | Resident    |         | (87)        |

| Family      | Clade Reference | Genus          | species       | Parental care | Region      | Movement  | Island  | Clutch       |
|-------------|-----------------|----------------|---------------|---------------|-------------|-----------|---------|--------------|
| Corvidae    | Rhipidurini     | Rhipidura      | atra          | Pair          | Australia   | Resident  |         | 1 (87)       |
| Corvidae    | Rhipidurini     | Rhipidura      | hyperythra    | Occasional    | Australia   | Resident  |         | 2 (87)       |
| Corvidae    | Rhipidurini     | Rhipidura      | albolimbata   | Pair          | Australia   | Resident  |         | 2 (87)       |
| Corvidae    | Rhipidurini     | Rhipidura      | phasiana      | Unknown       | Australia   | Resident  |         | 2 (49)       |
| Corvidae    | Rhipidurini     | Rhipidura      | fuliginosa    | Pair          | Australia   | Partial   |         | 3 (49)       |
| Corvidae    | Rhipidurini     | Rhipidura      | drownei       | Unknown       | Australia   | Resident  | Endemic | (87)         |
| Corvidae    | Rhipidurini     | Rhipidura      | tenebrosa     | Unknown       | Australia   | Resident  | Endemic | (46)         |
| Corvidae    | Rhipidurini     | Rhipidura      | rennelliana   | Unknown       | Australia   | Resident  |         | no source    |
| Corvidae    | Rhipidurini     | Rhipidura      | spilodera     | Pair          | Australia   | Resident  | Endemic | 2 (220)      |
| Corvidae    | Rhipidurini     | Rhipidura      | personata     | Unknown       | Australia   | Resident  | Endemic | (508)        |
| Corvidae    | Rhipidurini     | Rhipidura      | nebulosa      | Unknown       | Australia   | Resident  | Endemic | (508)        |
| Corvidae    | Rhipidurini     | Rhipidura      | brachyrhyncha | Unknown       | Australia   | Resident  |         | (87)         |
| Corvidae    | Rhipidurini     | Rhipidura      | teysmanni     | Unknown       | Australia   | Resident  |         | (88)         |
| Corvidae    | Rhipidurini     | Rhipidura      | superflua     | Unknown       | Australia   | Resident  | Endemic | (88)         |
| Corvidae    | Rhipidurini     | Rhipidura      | dedemi        | Unknown       | Australia   | Resident  | Endemic | (88)         |
| Corvidae    | Rhipidurini     | Rhipidura      | opistherythra | Unknown       | Australia   | Resident  | Endemic | (46)         |
| Corvidae    | Rhipidurini     | Rhipidura      | lepida        | Unknown       | Australia   | Resident  | Endemic | no source    |
| Corvidae    | Rhipidurini     | Rhipidura      | rufidorsa     | Unknown       | Australia   | Resident  |         | (87)         |
| Corvidae    | Rhipidurini     | Rhipidura      | dahli         | Unknown       | Australia   | Resident  | Endemic | (87)         |
| Corvidae    | Rhipidurini     | Rhipidura      | matthiae      | Unknown       | Australia   | Resident  | Endemic | (87)         |
| Corvidae    | Rhipidurini     | Rhipidura      | malaitae      | Unknown       | Australia   | Resident  | Endemic | (46)         |
| Corvidae    | Rhipidurini     | Rhipidura      | kubaryi       | Unknown       | Australia   | Resident  | Endemic | no source    |
| Corvidae    | Rhipidurini     | Rhipidura      | ruffrons      | Pair          | Australia   | Partial   |         | 2 (49)       |
| Corvidae    | Rhipidurini     | Rhipidura      | semirubra     | Unknown       | Australia   | Resident  | Endemic | (87)         |
| Corvidae    | Dicrurini       | Chaetorhynchus | papuensis     | Unknown       | Australia   | Resident  |         | (87)         |
| Corvidae    | Dicrurini       | Dicrurus       | ludwigii      | Unknown       | Africa      | Resident  |         | 2 (174)      |
| Corvidae    | Dicrurini       | Dicrurus       | atripennis    | Unknown       | Africa      | Resident  |         | 2 (174)      |
| Corvidae    | Dicrurini       | Dicrurus       | adsimilis     | Pair          | Africa      | Resident  |         | 3 (174)      |
| Corvidae    | Dicrurini       | Dicrurus       | modestus      | Unknown       | Africa      | Resident  | Endemic | (174)        |
| Corvidae    | Dicrurini       | Dicrurus       | aldabranus    | Unknown       | Africa      | Resident  | Endemic | 2 (452)      |
| Corvidae    | Dicrurini       | Dicrurus       | fuscipennis   | Pair          | Africa      | Resident  | Endemic | (46)         |
| Corvidae    | Dicrurini       | Dicrurus       | forficatus    | Pair          | Africa      | Resident  |         | 3 (284)      |
| Corvidae    | Dicrurini       | Dicrurus       | waldenii      | Unknown       | Africa      | Resident  | Endemic | 3 (46)       |
| Corvidae    | Dicrurini       | Dicrurus       | macrocerus    | Cooperation   | se Asia     | Partial   |         | 3 (306, 482) |
| Corvidae    | Dicrurini       | Dicrurus       | leucophaeus   | Unknown       | se Asia     | Partial   |         | 3 (6)        |
| Corvidae    | Dicrurini       | Dicrurus       | caeruleus     | Pair          | se Asia     | Resident  |         | 3 (6)        |
| Corvidae    | Dicrurini       | Dicrurus       | annectans     | Pair          | se Asia     | Partial   |         | 3 (6)        |
| Corvidae    | Dicrurini       | Dicrurus       | aeneus        | Pair          | se Asia     | Partial   |         | 3 (6)        |
| Corvidae    | Dicrurini       | Dicrurus       | remifer       | Pair          | se Asia     | Partial   |         | 3 (6)        |
| Corvidae    | Dicrurini       | Dicrurus       | hottentottus  | Pair          | Australia   | Partial   |         | 3 (6)        |
| Corvidae    | Dicrurini       | Dicrurus       | sumatranus    | Unknown       | se Asia     | Resident  |         | (46)         |
| Corvidae    | Dicrurini       | Dicrurus       | montanus      | Unknown       | Australia   | Resident  |         | (88)         |
| Corvidae    | Dicrurini       | Dicrurus       | densus        | Unknown       | Australia   | Resident  | Endemic | (88)         |
| Corvidae    | Dicrurini       | Dicrurus       | balicassius   | Unknown       | se Asia     | Resident  |         | (271)        |
| Corvidae    | Dicrurini       | Dicrurus       | bracteatus    | Pair          | Australia   | Resident  |         | 4 (470)      |
| Corvidae    | Dicrurini       | Dicrurus       | megarhynchus  | Unknown       | Australia   | Resident  | Endemic | (87)         |
| Corvidae    | Dicrurini       | Dicrurus       | andamanensis  | Pair          | se Asia     | Resident  | Endemic | 2 (6)        |
| Corvidae    | Dicrurini       | Dicrurus       | paradiseus    | Pair          | se Asia     | Resident  |         | 3 (6)        |
| Corvidae    | Monarchini      | Erythrocerus   | mccallii      | Cooperation   | Africa      | Resident  |         | (496)        |
| Corvidae    | Monarchini      | Erythrocerus   | holochlorus   | Suspected     | Africa      | Resident  |         | (496)        |
| Corvidae    | Monarchini      | Erythrocerus   | livingstonei  | Cooperation   | Africa      | Resident  |         | (383)        |
| Corvidae    | Monarchini      | Elminia        | longicauda    | Cooperation   | Africa      | Resident  |         | 2 (496)      |
| Corvidae    | Monarchini      | Elminia        | albicauda     | Unknown       | Africa      | Resident  |         | 2 (496)      |
| Corvidae    | Monarchini      | Trochocercus   | nigromitratus | Pair          | Africa      | Resident  |         | 2 (496)      |
| Corvidae    | Monarchini      | Trochocercus   | albiventris   | Pair          | Africa      | Resident  |         | 2 (496)      |
| Corvidae    | Monarchini      | Trochocercus   | albonotatus   | Pair          | Africa      | Resident  |         | (496)        |
| Corvidae    | Monarchini      | Trochocercus   | nitens        | Pair          | Africa      | Resident  |         | 2 (496)      |
| Corvidae    | Monarchini      | Trochocercus   | cyanomelas    | Pair          | Africa      | Resident  |         | (496)        |
| Corvidae    | Monarchini      | Hypothymis     | helenae       | Unknown       | se Asia     | Resident  |         | (271)        |
| Corvidae    | Monarchini      | Hypothymis     | coelestis     | Unknown       | se Asia     | Resident  |         | (92)         |
| Corvidae    | Monarchini      | Hypothymis     | azurea        | Pair          | se Asia     | Resident  |         | 3 (271)      |
| Corvidae    | Monarchini      | Eutrichomyias  | rowleyi       | Unknown       | se Asia     | Resident  | Endemic | (92)         |
| Corvidae    | Monarchini      | Terpsiphone    | rufiventer    | Pair          | Africa      | Resident  |         | 2 (496)      |
| Corvidae    | Monarchini      | Terpsiphone    | bedfordi      | Unknown       | Africa      | Resident  |         | 2 (496)      |
| Corvidae    | Monarchini      | Terpsiphone    | rufocinerea   | Pair          | Africa      | Resident  |         | 2 (496)      |
| Corvidae    | Monarchini      | Terpsiphone    | viridis       | Pair          | Africa      | Partial   |         | 2 (496)      |
| Corvidae    | Monarchini      | Terpsiphone    | atrochalybeia | Pair          | Africa      | Resident  | Endemic | 2 (496)      |
| Corvidae    | Monarchini      | Terpsiphone    | mutata        | Pair          | Africa      | Resident  |         | R.A. Mulder  |
| (pers comm) |                 |                |               |               |             |           |         |              |
| Corvidae    | Monarchini      | Terpsiphone    | corvina       | Pair          | Africa      | Resident  | Endemic | 1 (452)      |
| Corvidae    | Monarchini      | Terpsiphone    | bourbonensis  | Pair          | Africa      | Resident  | Endemic | 3 (69)       |
| Corvidae    | Monarchini      | Terpsiphone    | paradisi      | Pair          | se Asia     | Partial   |         | 4 (343)      |
| Corvidae    | Monarchini      | Terpsiphone    | atrocaudata   | Pair          | Palaearctic | Migration |         | 4 (341)      |

| Family   | Clade Reference | Genus            | species          | Parental care | Region    | Movement  | Island  | Clutch       |
|----------|-----------------|------------------|------------------|---------------|-----------|-----------|---------|--------------|
| Corvidae | Monarchini      | Terpsiphone      | cinnamomea       | Pair          | se Asia   | Resident  |         | 3 (271)      |
| Corvidae | Monarchini      | Terpsiphone      | cyanescens       | Unknown       | se Asia   | Resident  |         | (271)        |
| Corvidae | Monarchini      | Chasiempis       | sandwichensis    | Unknown       | Australia | Resident  | Endemic | 2 (501)      |
| Corvidae | Monarchini      | Pomarea          | dimidiata        | Cooperation   | Australia | Resident  | Endemic | 2 (438)      |
| Corvidae | Monarchini      | Pomarea          | nigra            | Unknown       | Australia | Resident  | Endemic | (483)        |
| Corvidae | Monarchini      | Pomarea          | iphis            | Pair          | Australia | Resident  | Endemic | (483)        |
| Corvidae | Monarchini      | Pomarea          | mendozae         | Pair          | Australia | Resident  | Endemic | (483)        |
| Corvidae | Monarchini      | Pomarea          | whitneyi         | Pair          | Australia | Resident  | Endemic | (483)        |
| Corvidae | Monarchini      | Mayrornis        | versicolor       | Unknown       | Australia | Resident  | Endemic | (508)        |
| Corvidae | Monarchini      | Mayrornis        | lessoni          | Unknown       | Australia | Resident  | Endemic | 1 (508)      |
| Corvidae | Monarchini      | Mayrornis        | schistaceus      | Unknown       | Australia | Resident  | Endemic | (46)         |
| Corvidae | Monarchini      | Neolalage        | banksiana        | Unknown       | Australia | Resident  | Endemic | 2 (53)       |
| Corvidae | Monarchini      | Clytorhynchus    | pachycephaloides | Pair          | Australia | Resident  | Endemic | 2 (220)      |
| Corvidae | Monarchini      | Clytorhynchus    | vitiensis        | Unknown       | Australia | Resident  | Endemic | 2 (508)      |
| Corvidae | Monarchini      | Clytorhynchus    | nigrogularis     | Unknown       | Australia | Resident  | Endemic | (508)        |
| Corvidae | Monarchini      | Clytorhynchus    | hamlini          | Unknown       | Australia | Resident  | Endemic | no source    |
| Corvidae | Monarchini      | Metabolus        | rugensis         | Unknown       | Australia | Resident  | Endemic | (46)         |
| Corvidae | Monarchini      | Monarcha         | axillaris        | Unknown       | Australia | Resident  |         | 1 (87)       |
| Corvidae | Monarchini      | Monarcha         | riubiensis       | Unknown       | Australia | Resident  |         | (87)         |
| Corvidae | Monarchini      | Monarcha         | cinerascens      | Unknown       | Australia | Resident  |         | 1 (87)       |
| Corvidae | Monarchini      | Monarcha         | frater           | Pair          | Australia | Migration |         | 2 (49)       |
| Corvidae | Monarchini      | Monarcha         | melanopsis       | Pair          | Australia | Migration |         | 2 (49)       |
| Corvidae | Monarchini      | Monarcha         | erythrostickus   | Unknown       | Australia | Resident  | Endemic | no source    |
| Corvidae | Monarchini      | Monarcha         | castaneiventris  | Unknown       | Australia | Resident  | Endemic | 3 (87)       |
| Corvidae | Monarchini      | Monarcha         | richardsii       | Unknown       | Australia | Resident  | Endemic | no source    |
| Corvidae | Monarchini      | Monarcha         | pileatus         | Unknown       | Australia | Resident  | Endemic | (88)         |
| Corvidae | Monarchini      | Monarcha         | castus           | Unknown       | Australia | Resident  | Endemic | no source    |
| Corvidae | Monarchini      | Monarcha         | leucotis         | Pair          | Australia | Partial   |         | 2 (49)       |
| Corvidae | Monarchini      | Monarcha         | guttulus         | Pair          | Australia | Resident  |         | 2 (87)       |
| Corvidae | Monarchini      | Monarcha         | mundus           | Unknown       | Australia | Resident  | Endemic | (88)         |
| Corvidae | Monarchini      | Monarcha         | trivirgatus      | Pair          | Australia | Partial   |         | 2 (49)       |
| Corvidae | Monarchini      | Monarcha         | sacerdotum       | Unknown       | Australia | Resident  | Endemic | (92)         |
| Corvidae | Monarchini      | Monarcha         | everetti         | Unknown       | Australia | Resident  | Endemic | (92)         |
| Corvidae | Monarchini      | Monarcha         | loricatus        | Unknown       | Australia | Resident  | Endemic | (88)         |
| Corvidae | Monarchini      | Monarcha         | boanensis        | Unknown       | Australia | Resident  | Endemic | (92)         |
| Corvidae | Monarchini      | Monarcha         | leucurus         | Unknown       | Australia | Resident  | Endemic | (92)         |
| Corvidae | Monarchini      | Monarcha         | julianae         | Unknown       | Australia | Resident  | Endemic | (92)         |
| Corvidae | Monarchini      | Monarcha         | manadensis       | Unknown       | Australia | Resident  |         | 2 (87)       |
| Corvidae | Monarchini      | Monarcha         | brehmii          | Unknown       | Australia | Resident  |         | (92)         |
| Corvidae | Monarchini      | Monarcha         | infelix          | Unknown       | Australia | Resident  | Endemic | (87)         |
| Corvidae | Monarchini      | Monarcha         | menckei          | Unknown       | Australia | Resident  | Endemic | (87)         |
| Corvidae | Monarchini      | Monarcha         | verticalis       | Unknown       | Australia | Resident  | Endemic | 2 (87)       |
| Corvidae | Monarchini      | Monarcha         | barbatus         | Unknown       | Australia | Resident  | Endemic | 2 (87)       |
| Corvidae | Monarchini      | Monarcha         | browni           | Unknown       | Australia | Resident  | Endemic | (46)         |
| Corvidae | Monarchini      | Monarcha         | viduus           | Unknown       | Australia | Resident  | Endemic | no source    |
| Corvidae | Monarchini      | Monarcha         | godeffroyi       | Unknown       | Australia | Resident  | Endemic | (46)         |
| Corvidae | Monarchini      | Monarcha         | takatsukasae     | Unknown       | Australia | Resident  | Endemic | (313)        |
| Corvidae | Monarchini      | Monarcha         | chrysomela       | Pair          | Australia | Resident  |         | (87)         |
| Corvidae | Monarchini      | Arses            | telescopthalmus  | Pair          | Australia | Resident  |         | 2 (49, 87)   |
| Corvidae | Monarchini      | Arses            | insularis        | Unknown       | Australia | Resident  |         | 2 (87)       |
| Corvidae | Monarchini      | Arses            | kaupi            | Pair          | Australia | Resident  |         | 2 (49)       |
| Corvidae | Monarchini      | Myiagra          | freycineti       | Unknown       | Australia | Resident  | Endemic | no source    |
| Corvidae | Monarchini      | Myiagra          | erythroptus      | Unknown       | Australia | Resident  | Endemic | no source    |
| Corvidae | Monarchini      | Myiagra          | oceanica         | Unknown       | Australia | Resident  | Endemic | no source    |
| Corvidae | Monarchini      | Myiagra          | pluto            | Unknown       | Australia | Resident  | Endemic | no source    |
| Corvidae | Monarchini      | Myiagra          | atra             | Unknown       | Australia | Resident  | Endemic | (46)         |
| Corvidae | Monarchini      | Myiagra          | galeata          | Unknown       | Australia | Resident  | Endemic | (88)         |
| Corvidae | Monarchini      | Myiagra          | rubecula         | Pair          | Australia | Migration |         | 2 (49)       |
| Corvidae | Monarchini      | Myiagra          | ferrocyanea      | Unknown       | Australia | Resident  | Endemic | (87)         |
| Corvidae | Monarchini      | Myiagra          | cervinicauda     | Unknown       | Australia | Resident  | Endemic | no source    |
| Corvidae | Monarchini      | Myiagra          | caledonica       | Pair          | Australia | Resident  | Endemic | 2 (220)      |
| Corvidae | Monarchini      | Myiagra          | vanikorensis     | Unknown       | Australia | Resident  | Endemic | 1 (508)      |
| Corvidae | Monarchini      | Myiagra          | albiventris      | Unknown       | Australia | Resident  | Endemic | (508)        |
| Corvidae | Monarchini      | Myiagra          | azureocapilla    | Unknown       | Australia | Resident  | Endemic | 1 (508)      |
| Corvidae | Monarchini      | Myiagra          | ruficollis       | Pair          | Australia | Resident  |         | 2 (49)       |
| Corvidae | Monarchini      | Myiagra          | cyanoleuca       | Pair          | Australia | Migration |         | 2 (49)       |
| Corvidae | Monarchini      | Myiagra          | inquieta         | Pair          | Australia | Partial   |         | 2 (49)       |
| Corvidae | Monarchini      | Myiagra          | alecto           | Pair          | Australia | Resident  |         | 2 (49)       |
| Corvidae | Monarchini      | Myiagra          | hebetior         | Unknown       | Australia | Resident  | Endemic | 2 (88)       |
| Corvidae | Monarchini      | Lamprolia        | victoriae        | Pair          | Australia | Resident  | Endemic | 1 (167, 508) |
| Corvidae | Monarchini      | Machaerirhynchus | flaviventer      | Pair          | Australia | Resident  |         | 2 (49)       |
| Corvidae | Monarchini      | Machaerirhynchus | nigrippectus     | Unknown       | Australia | Resident  |         | 2 (87)       |
| Corvidae | Monarchini      | Grallina         | cyanoleuca       | Occasional    | Australia | Resident  |         | (213)        |

| Family   | Clade Reference | Genus        | species        | Parental care | Region    | Movement | Island | Clutch  |
|----------|-----------------|--------------|----------------|---------------|-----------|----------|--------|---------|
| Corvidae | Monarchini      | Grallina     | bruijni        | Unknown       | Australia | Resident |        | 1 (87)  |
| Corvidae | Aegithinae      | Aegithina    | tiphia         | Pair          | se Asia   | Resident |        | 3 (5)   |
| Corvidae | Aegithinae      | Aegithina    | nigrolutea     | Pair          | se Asia   | Resident |        | 1 (5)   |
| Corvidae | Aegithinae      | Aegithina    | viridissima    | Unknown       | se Asia   | Resident |        | 2 (46)  |
| Corvidae | Aegithinae      | Aegithina    | lafresnayei    | Unknown       | se Asia   | Resident |        | 3 (305) |
| Corvidae | Malaconotini    | Lanioturdus  | torquatus      | Pair          | Africa    | Resident |        | 2 (223) |
| Corvidae | Malaconotini    | Nilaus       |                | Pair          | Africa    | Resident |        | (223)   |
| Corvidae | Malaconotini    | Dryoscopus   | gambensis      | Unknown       | Africa    | Resident |        | 2 (223) |
| Corvidae | Malaconotini    | Dryoscopus   | pringlii       | Unknown       | Africa    | Resident |        | 2 (223) |
| Corvidae | Malaconotini    | Dryoscopus   | cubla          | Occasional    | Africa    | Resident |        | (222)   |
| Corvidae | Malaconotini    | Dryoscopus   | senegalensis   | Pair          | Africa    | Resident |        | 2 (174) |
| Corvidae | Malaconotini    | Dryoscopus   | angolensis     | Unknown       | Africa    | Resident |        | (223)   |
| Corvidae | Malaconotini    | Dryoscopus   | sabini         | Unknown       | Africa    | Resident |        | (223)   |
| Corvidae | Malaconotini    | Tchagra      | minuta         | Unknown       | Africa    | Resident |        | 2 (223) |
| Corvidae | Malaconotini    | Tchagra      | anchietae      | Unknown       | Africa    | Resident |        | (223)   |
| Corvidae | Malaconotini    | Tchagra      | senegala       | Pair          | Africa    | Resident |        | 3 (223) |
| Corvidae | Malaconotini    | Tchagra      | australis      | Pair          | Africa    | Resident |        | 2 (223) |
| Corvidae | Malaconotini    | Tchagra      | jamesi         | Pair          | Africa    | Resident |        | 2 (223) |
| Corvidae | Malaconotini    | Tchagra      | tchagra        | Pair          | Africa    | Resident |        | 2 (223) |
| Corvidae | Malaconotini    | Laniarius    | ruficeps       | Unknown       | Africa    | Resident |        | 3 (223) |
| Corvidae | Malaconotini    | Laniarius    | luehderi       | Pair          | Africa    | Resident |        | 2 (223) |
| Corvidae | Malaconotini    | Laniarius    | brauni         | Unknown       | Africa    | Resident |        | (223)   |
| Corvidae | Malaconotini    | Laniarius    | amboimensis    | Unknown       | Africa    | Resident |        | (223)   |
| Corvidae | Malaconotini    | Laniarius    | liberatus      | Unknown       | Africa    | Resident |        | (223)   |
| Corvidae | Malaconotini    | Laniarius    | turatii        | Unknown       | Africa    | Resident |        | 2 (223) |
| Corvidae | Malaconotini    | Laniarius    | aethiopicus    | Pair          | Africa    | Resident |        | 3 (223) |
| Corvidae | Malaconotini    | Laniarius    | bicolor        | Pair          | Africa    | Resident |        | 2 (223) |
| Corvidae | Malaconotini    | Laniarius    | ferrugineus    | Pair          | Africa    | Resident |        | 2 (223) |
| Corvidae | Malaconotini    | Laniarius    | barbarus       | Unknown       | Africa    | Resident |        | 2 (223) |
| Corvidae | Malaconotini    | Laniarius    | erythrogaster  | Unknown       | Africa    | Resident |        | (223)   |
| Corvidae | Malaconotini    | Laniarius    | atrococcineus  | Pair          | Africa    | Resident |        | 2 (223) |
| Corvidae | Malaconotini    | Laniarius    | mufumbiri      | Unknown       | Africa    | Resident |        | (223)   |
| Corvidae | Malaconotini    | Laniarius    | atroflavus     | Pair          | Africa    | Resident |        | (223)   |
| Corvidae | Malaconotini    | Laniarius    | funebri        | Pair          | Africa    | Resident |        | 2 (223) |
| Corvidae | Malaconotini    | Laniarius    | leucorhynchus  | Unknown       | Africa    | Resident |        | 2 (223) |
| Corvidae | Malaconotini    | Laniarius    | poensis        | Unknown       | Africa    | Resident |        | (223)   |
| Corvidae | Malaconotini    | Laniarius    | fuelleborni    | Unknown       | Africa    | Resident |        | 2 (223) |
| Corvidae | Malaconotini    | Rhodophoneus | cruentus       | Unknown       | Africa    | Resident |        | 2 (223) |
| Corvidae | Malaconotini    | Telophorus   | zeylonus       | Pair          | Africa    | Resident |        | 2 (223) |
| Corvidae | Malaconotini    | Telophorus   | bocagei        | Unknown       | Africa    | Resident |        | 2 (223) |
| Corvidae | Malaconotini    | Telophorus   | sulfureopectus | Pair          | Africa    | Resident |        | 2 (223) |
| Corvidae | Malaconotini    | Telophorus   | olivaceus      | Pair          | Africa    | Resident |        | 2 (223) |
| Corvidae | Malaconotini    | Telophorus   | multicolor     | Unknown       | Africa    | Resident |        | (223)   |
| Corvidae | Malaconotini    | Telophorus   | nigrifrons     | Unknown       | Africa    | Resident |        | 2 (223) |
| Corvidae | Malaconotini    | Telophorus   | kupeensis      | Unknown       | Africa    | Resident |        | (223)   |
| Corvidae | Malaconotini    | Telophorus   | viridis        | Pair          | Africa    | Resident |        | 2 (223) |
| Corvidae | Malaconotini    | Telophorus   | dohertyi       | Unknown       | Africa    | Resident |        | (223)   |
| Corvidae | Malaconotini    | Telophorus   | quadricolor    | Unknown       | Africa    | Resident |        | (223)   |
| Corvidae | Malaconotini    | Malaconotus  | cruentus       | Pair          | Africa    | Resident |        | 2 (223) |
| Corvidae | Malaconotini    | Malaconotus  | lagdeni        | Pair          | Africa    | Resident |        | 2 (223) |
| Corvidae | Malaconotini    | Malaconotus  | gladiator      | Unknown       | Africa    | Resident |        | (223)   |
| Corvidae | Malaconotini    | Malaconotus  | blanchoti      | Pair          | Africa    | Resident |        | 3 (223) |
| Corvidae | Malaconotini    | Malaconotus  | monteiri       | Unknown       | Africa    | Resident |        | (223)   |
| Corvidae | Malaconotini    | Malaconotus  | alius          | Unknown       | Africa    | Resident |        | (223)   |
| Corvidae | Vangini         | Prionops     | plumatus       | Cooperation   | Africa    | Resident |        | 4 (223) |
| Corvidae | Vangini         | Prionops     | poliophilus    | Cooperation   | Africa    | Resident |        | 3 (223) |
| Corvidae | Vangini         | Prionops     | alberti        | Cooperation   | Africa    | Resident |        | (223)   |
| Corvidae | Vangini         | Prionops     | caniceps       | Cooperation   | Africa    | Resident |        | (223)   |
| Corvidae | Vangini         | Prionops     | rufiventris    | Unknown       | Africa    | Resident |        | (223)   |
| Corvidae | Vangini         | Prionops     | retzii         | Cooperation   | Africa    | Resident |        | 3 (223) |
| Corvidae | Vangini         | Prionops     | gabela         | Suspected     | Africa    | Resident |        | (223)   |
| Corvidae | Vangini         | Prionops     | scopifrons     | Cooperation   | Africa    | Resident |        | 3 (223) |
| Corvidae | Vangini         | Bias         | flammulatus    | Suspected     | Africa    | Resident |        | 3 (496) |
| Corvidae | Vangini         | Bias         | musicus        | Suspected     | Africa    | Resident |        | 2 (223) |
| Corvidae | Vangini         | Pseudobias   | wardi          | Unknown       | Africa    | Resident |        | (284)   |
| Corvidae | Vangini         | Batis        | diops          | Unknown       | Africa    | Resident |        | (496)   |
| Corvidae | Vangini         | Batis        | margaritae     | Unknown       | Africa    | Resident |        | (496)   |
| Corvidae | Vangini         | Batis        | mixta          | Unknown       | Africa    | Resident |        | 2 (496) |
| Corvidae | Vangini         | Batis        | reichenowi     | Unknown       | Africa    | Resident |        | (496)   |
| Corvidae | Vangini         | Batis        | dimorpha       | Unknown       | Africa    | Resident |        | (496)   |
| Corvidae | Vangini         | Batis        | capensis       | Suspected     | Africa    | Resident |        | 2 (496) |
| Corvidae | Vangini         | Batis        | fratrum        | Unknown       | Africa    | Resident |        | 2 (496) |
| Corvidae | Vangini         | Batis        | molitor        | Suspected     | Africa    | Resident |        | 2 (496) |



| Family                 | Clade Reference | Genus         | species          | Parental care | Region     | Movement  | Island  | Clutch     |
|------------------------|-----------------|---------------|------------------|---------------|------------|-----------|---------|------------|
| Corvidae               | Vangini         | Batis         | soror            | Suspected     | Africa     | Resident  |         | 2 (496)    |
| Corvidae               | Vangini         | Batis         | pirrit           | Pair          | Africa     | Resident  |         | 2 (496)    |
| Corvidae               | Vangini         | Batis         | senegalensis     | Group         | Africa     | Resident  |         | 2 (496)    |
| Corvidae               | Vangini         | Batis         | orientalis       | Unknown       | Africa     | Resident  |         | 2 (496)    |
| Corvidae               | Vangini         | Batis         | minor            | Pair          | Africa     | Resident  |         | 2 (496)    |
| Corvidae               | Vangini         | Batis         | perkeo           | Unknown       | Africa     | Resident  |         | (496)      |
| Corvidae               | Vangini         | Batis         | minima           | Unknown       | Africa     | Resident  |         | (496)      |
| Corvidae               | Vangini         | Batis         | ituriensis       | Unknown       | Africa     | Resident  |         | (496)      |
| Corvidae               | Vangini         | Batis         | occulta          | Unknown       | Africa     | Resident  |         | (496)      |
| Corvidae               | Vangini         | Batis         | poensis          | Unknown       | Africa     | Resident  | Endemic | 2 (496)    |
| Corvidae               | Vangini         | Batis         | minulla          | Unknown       | Africa     | Resident  |         | 2 (496)    |
| Corvidae               | Vangini         | Platysteira   | cyanea           | Pair          | Africa     | Resident  |         | 2 (496)    |
| Corvidae               | Vangini         | Platysteira   | laticincta       | Unknown       | Africa     | Resident  |         | (496)      |
| Corvidae               | Vangini         | Platysteira   | albifrons        | Unknown       | Africa     | Resident  |         | (496)      |
| Corvidae               | Vangini         | Platysteira   | peltata          | Cooperation   | Africa     | Resident  |         | 2 (223)    |
| Corvidae               | Vangini         | Platysteira   | castanea         | Cooperation   | Africa     | Resident  |         | 2 (496)    |
| Corvidae               | Vangini         | Platysteira   | tonsa            | Cooperation   | Africa     | Resident  |         | (496)      |
| Corvidae               | Vangini         | Platysteira   | blissetti        | Cooperation   | Africa     | Resident  |         | 2 (496)    |
| Corvidae               | Vangini         | Platysteira   | chalybea         | Cooperation   | Africa     | Resident  |         | 2 (223)    |
| Corvidae               | Vangini         | Platysteira   | jamesoni         | Unknown       | Africa     | Resident  |         | (223)      |
| Corvidae               | Vangini         | Platysteira   | concreta         | Unknown       | Africa     | Resident  |         | 2 (223)    |
| Corvidae               | Vangini         | Philentoma    | pyrhopterum      | Unknown       | se Asia    | Resident  |         | (223)      |
| Corvidae               | Vangini         | Philentoma    | velatum          | Unknown       | se Asia    | Resident  |         | 2 (223)    |
| Corvidae               | Vangini         | Tephrodornis  | gularis          | Pair          | se Asia    | Resident  |         | 3 (223)    |
| Corvidae               | Vangini         | Tephrodornis  | pondicerianus    | Pair          | se Asia    | Resident  |         | 3 (223)    |
| Corvidae               | Vangini         | Calicalicus   | madagascariensis | Pair          | Africa     | Resident  |         | 2 (284)    |
| Corvidae               | Vangini         | Schetba       | rufa             | Cooperation   | Africa     | Resident  |         | (137, 534) |
| Corvidae               | Vangini         | Vanga         | curvirostris     | Pair          | Africa     | Resident  |         | 2 (409)    |
| Corvidae               | Vangini         | Xenopirostris | xenopirostris    | Unknown       | Africa     | Resident  |         | (284)      |
| Corvidae               | Vangini         | Xenopirostris | damii            | Pair          | Africa     | Resident  |         | (342)      |
| Corvidae               | Vangini         | Xenopirostris | polleni          | Pair          | Africa     | Resident  |         | 2 (403)    |
| Corvidae               | Vangini         | Artamella     | viridis          | Group         | Africa     | Resident  |         | (357)      |
| Corvidae               | Vangini         | Falco         | palliata         | Unknown       | Africa     | Resident  |         | (136)      |
| Corvidae               | Vangini         | Leptopterus   | chabert          | Cooperation   | Africa     | Resident  |         | (19)       |
| Corvidae               | Vangini         | Cyanolanius   | madagascarinus   | Unknown       | Africa     | Resident  |         | (284)      |
| Corvidae               | Vangini         | Oriolia       | bernieri         | Cooperation   | Africa     | Resident  |         | (486)      |
| Corvidae               | Vangini         | Euryceros     | prevostii        | Pair          | Africa     | Resident  |         | 3 (281)    |
| Corvidae               | Vangini         | Tylas         | eduardi          | Unknown       | Africa     | Resident  |         | 2 (284)    |
| Corvidae               | Vangini         | Hypositta     | corallirostris   | Unknown       | Africa     | Resident  |         | (284)      |
| Callaeatidae           | Callaeatidae    | Callaeas      | cinerea          | Pair          | Australia  | Resident  |         | 3 (422)    |
| Callaeatidae           | Callaeatidae    | Philesturnus  | carunculatus     | Pair          | Australia  | Resident  |         | 2 (422)    |
| Callaeatidae           | Callaeatidae    | Heteralocha   | acutirostris     | Unknown       | Australia  | Resident  |         | (422)      |
| Picathartidae          | Picathartidae   | Chaetops      | frenatus         | Cooperation   | Africa     | Resident  |         | 2 (237)    |
| Picathartidae          | Picathartidae   | Chaetops      | aurantius        | Unknown       | Africa     | Resident  |         | (174)      |
| Picathartidae          | Picathartidae   | Picathartes   | gymnocephalus    | Unknown       | Africa     | Resident  |         | 2 (485)    |
| Picathartidae          | Picathartidae   | Picathartes   | oreas            | Unknown       | Africa     | Resident  |         | 2 H.S.     |
| Thompson (pers. comm.) |                 |               |                  |               |            |           |         |            |
| Aegithalidae           | Aegithalidae    | Aegithalos    | caudatus         | Cooperation   | Paleartic  | Resident  |         | 9 (224)    |
| Aegithalidae           | Aegithalidae    | Aegithalos    | leucogenys       | Pair          | Paleartic  | Resident  |         | 7 (221)    |
| Aegithalidae           | Aegithalidae    | Aegithalos    | concinus         | Pair          | Paleartic  | Resident  |         | 7 (221)    |
| Aegithalidae           | Aegithalidae    | Aegithalos    | niveogularis     | Unknown       | Paleartic  | Resident  |         | (221)      |
| Aegithalidae           | Aegithalidae    | Aegithalos    | iouschistos      | Pair          | Paleartic  | Resident  |         | (221)      |
| Aegithalidae           | Aegithalidae    | Aegithalos    | fuliginosus      | Unknown       | Paleartic  | Resident  |         | (221)      |
| Aegithalidae           | Aegithalidae    | Psaltriparus  | minimus          | Cooperation   | Nearctic   | Resident  |         | 5 (457)    |
| Aegithalidae           | Aegithalidae    | Psaltria      | exilis           | Unknown       | se Asia    | Resident  |         | (221)      |
| Aegithalidae           | Aegithalidae    | Leptopoecile  | sophiae          | Suspected     | Paleartic  | Resident  |         | (301, 473) |
| Aegithalidae           | Aegithalidae    | Leptopoecile  | elegans          | Unknown       | Paleartic  | Resident  |         | (8)        |
| Alaudidae              | Alaudidae       | Mirafra       | passerina        | Pair          | Africa     | Nomadic   |         | 3 (269)    |
| Alaudidae              | Alaudidae       | Mirafra       | cantillans       | Pair          | Africa     | Partial   |         | 4 (269)    |
| Alaudidae              | Alaudidae       | Mirafra       | javanica         | Pair          | Widespread |           | Nomadic | (469)      |
| Alaudidae              | Alaudidae       | Mirafra       | cheniana         | Pair          | Africa     | Resident  |         | 3 (269)    |
| Alaudidae              | Alaudidae       | Mirafra       | albicauda        | Pair          | Africa     | Resident  |         | 2 (269)    |
| Alaudidae              | Alaudidae       | Mirafra       | hova             | Unknown       | Africa     | Resident  |         | 2 (284)    |
| Alaudidae              | Alaudidae       | Mirafra       | cordofanica      | Unknown       | Africa     | Partial   |         | (269)      |
| Alaudidae              | Alaudidae       | Mirafra       | williamsi        | Unknown       | Africa     | Resident  |         | (269)      |
| Alaudidae              | Alaudidae       | Mirafra       | pulpa            | Unknown       | Africa     | Migration |         | (269)      |
| Alaudidae              | Alaudidae       | Mirafra       | hypermetra       | Pair          | Africa     | Resident  |         | 2 (269)    |
| Alaudidae              | Alaudidae       | Mirafra       | somalica         | Unknown       | Africa     | Resident  |         | 3 (269)    |
| Alaudidae              | Alaudidae       | Mirafra       | ashi             | Unknown       | Africa     | Resident  |         | (269)      |
| Alaudidae              | Alaudidae       | Mirafra       | africana         | Pair          | Africa     | Resident  |         | 2 (269)    |
| Alaudidae              | Alaudidae       | Mirafra       | sharpii          | Unknown       | Africa     | Resident  |         | (269)      |
| Alaudidae              | Alaudidae       | Mirafra       | angolensis       | Unknown       | Africa     | Resident  |         | 3 (269)    |
| Alaudidae              | Alaudidae       | Mirafra       | rufocinnamomea   | Pair          | Africa     | Resident  |         | 2 (269)    |

| Family    | Clade Reference | Genus         | species         | Parental care | Region     | Movement  | Island   | Clutch  |
|-----------|-----------------|---------------|-----------------|---------------|------------|-----------|----------|---------|
| Alaudidae | Alaudidae       | Mirafra       | apiata          | Pair          | Africa     | Resident  |          | 3 (269) |
| Alaudidae | Alaudidae       | Mirafra       | collaris        | Unknown       | Africa     | Resident  |          | 3 (269) |
| Alaudidae | Alaudidae       | Mirafra       | africanoides    | Pair          | Africa     | Resident  |          | 2 (269) |
| Alaudidae | Alaudidae       | Mirafra       | alopex          | Unknown       | Africa     | Resident  |          | (269)   |
| Alaudidae | Alaudidae       | Mirafra       | erythroptera    | Unknown       | se Asia    | Resident  |          | 3 (6)   |
| Alaudidae | Alaudidae       | Mirafra       | assamica        | Pair          | se Asia    | Resident  |          | 3 (6)   |
| Alaudidae | Alaudidae       | Mirafra       | rufa            | Unknown       | Africa     | Resident  |          | (269)   |
| Alaudidae | Alaudidae       | Mirafra       | gilletti        | Pair          | Africa     | Resident  |          | 3 (269) |
| Alaudidae | Alaudidae       | Mirafra       | poecilosterna   | Pair          | Africa     | Resident  |          | 2 (269) |
| Alaudidae | Alaudidae       | Mirafra       | degodiensis     | Unknown       | Africa     | Resident  |          | (269)   |
| Alaudidae | Alaudidae       | Mirafra       | naevia          | Unknown       | Africa     | Resident  |          | (269)   |
| Alaudidae | Alaudidae       | Mirafra       | sabota          | Pair          | Africa     | Resident  |          | 2 (269) |
| Alaudidae | Alaudidae       | Pinarocorys   | erythropterygia | Unknown       | Africa     | Migration |          | 2 (269) |
| Alaudidae | Alaudidae       | Pinarocorys   | nigricans       | Pair          | Africa     | Migration |          | 2 (269) |
| Alaudidae | Alaudidae       | Heteromirafra | archeri         | Unknown       | Africa     | Resident  |          | 3 (269) |
| Alaudidae | Alaudidae       | Heteromirafra | sidamoensis     | Unknown       | Africa     | Resident  |          | (269)   |
| Alaudidae | Alaudidae       | Heteromirafra | ruddi           | Pair          | Africa     | Resident  |          | 3 (269) |
| Alaudidae | Alaudidae       | Certhilauda   | curvirostris    | Pair          | Africa     | Resident  |          | 3 (269) |
| Alaudidae | Alaudidae       | Certhilauda   | chuana          | Unknown       | Africa     | Resident  |          | (269)   |
| Alaudidae | Alaudidae       | Certhilauda   | erythrochlamys  | Pair          | Africa     | Resident  |          | 2 (269) |
| Alaudidae | Alaudidae       | Certhilauda   | albescens       | Pair          | Africa     | Resident  |          | 3 (269) |
| Alaudidae | Alaudidae       | Certhilauda   | burra           | Pair          | Africa     | Resident  |          | 2 (269) |
| Alaudidae | Alaudidae       | Chersomanes   | albofasciata    | Cooperation   | Africa     | Resident  |          | 2 (465) |
| Alaudidae | Alaudidae       | Eremopterix   | leucotis        | Pair          | Africa     | Nomadic   |          | 3 (269) |
| Alaudidae | Alaudidae       | Eremopterix   | australis       | Pair          | Africa     | Nomadic   |          | 2 (269) |
| Alaudidae | Alaudidae       | Eremopterix   | verticalis      | Pair          | Africa     | Nomadic   |          | 2 (269) |
| Alaudidae | Alaudidae       | Eremopterix   | leucopareia     | Unknown       | Africa     | Nomadic   |          | 2 (269) |
| Alaudidae | Alaudidae       | Eremopterix   | signata         | Unknown       | Africa     | Nomadic   |          | 4 (269) |
| Alaudidae | Alaudidae       | Eremopterix   | nigriceps       | Pair          | Africa     | Partial   |          | 3 (269) |
| Alaudidae | Alaudidae       | Eremopterix   | grisea          | Pair          | se Asia    | Resident  |          | 2 (6)   |
| Alaudidae | Alaudidae       | Ammomanes     | cincturus       | Pair          | Africa     | Resident  |          | 3 (269) |
| Alaudidae | Alaudidae       | Ammomanes     | phoenicurus     | Pair          | se Asia    | Resident  |          | 3 (6)   |
| Alaudidae | Alaudidae       | Ammomanes     | deserti         | Unknown       | Africa     | Resident  |          | 4 (269) |
| Alaudidae | Alaudidae       | Ammomanes     | grayi           | Pair          | Africa     | Resident  |          | 2 (269) |
| Alaudidae | Alaudidae       | Alaemon       | alaudipes       | Pair          | Africa     | Resident  |          | 3 (269) |
| Alaudidae | Alaudidae       | Alaemon       | hamertoni       | Unknown       | Africa     | Resident  |          | 2 (269) |
| Alaudidae | Alaudidae       | Ramphocoris   | clotbey         | Pair          | Africa     | Resident  |          | 4 (269) |
| Alaudidae | Alaudidae       | Melanocorypha | calandra        | Suspected     | Paleartic  | Partial   |          | 4 (269) |
| Alaudidae | Alaudidae       | Melanocorypha | bimaculata      | Pair          | Paleartic  | Migration |          | 4 (103) |
| Alaudidae | Alaudidae       | Melanocorypha | maxima          | Unknown       | Paleartic  | Resident  |          | 2 (320) |
| Alaudidae | Alaudidae       | Melanocorypha | mongolica       | Pair          | Paleartic  | Migration |          | 3 (158) |
| Alaudidae | Alaudidae       | Melanocorypha | leucoptera      | Pair          | Paleartic  | Migration |          | 6 (103) |
| Alaudidae | Alaudidae       | Melanocorypha | yeltoniensis    | Pair          | Paleartic  | Nomadic   |          | 5 (103) |
| Alaudidae | Alaudidae       | Calandrella   | brachydactyla   | Pair          | Paleartic  | Migration |          | 4 (103) |
| Alaudidae | Alaudidae       | Calandrella   | blanfordi       | Unknown       | Africa     | Nomadic   |          | (269)   |
| Alaudidae | Alaudidae       | Calandrella   | erlangeri       | Unknown       | Africa     | Nomadic   |          | (269)   |
| Alaudidae | Alaudidae       | Calandrella   | cinerea         | Pair          | Africa     | Nomadic   |          | 2 (269) |
| Alaudidae | Alaudidae       | Calandrella   | acutirostris    | Pair          | Paleartic  | Migration |          | 3 (6)   |
| Alaudidae | Alaudidae       | Calandrella   | rufescens       | Pair          | Paleartic  | Nomadic   |          | 4 (103) |
| Alaudidae | Alaudidae       | Calandrella   | cheleensis      | Unknown       | Paleartic  | Migration |          | (103)   |
| Alaudidae | Alaudidae       | Calandrella   | raytal          | Pair          | Paleartic  | Resident  |          | 3 (6)   |
| Alaudidae | Alaudidae       | Calandrella   | somalica        | Unknown       | Africa     | Nomadic   |          | 4 (269) |
| Alaudidae | Alaudidae       | Calandrella   | athensis        | Unknown       | Africa     | Nomadic   |          | 2 (269) |
| Alaudidae | Alaudidae       | Spizocorys    | conirostris     | Pair          | Africa     | Resident  |          | 2 (269) |
| Alaudidae | Alaudidae       | Spizocorys    | sclateri        | Pair          | Africa     | Nomadic   |          | 1 (269) |
| Alaudidae | Alaudidae       | Spizocorys    | obbiensis       | Unknown       | Africa     | Resident  |          | 2 (269) |
| Alaudidae | Alaudidae       | Spizocorys    | personata       | Unknown       | Africa     | Resident  |          | (269)   |
| Alaudidae | Alaudidae       | Spizocorys    | fringillaris    | Pair          | Africa     | Resident  |          | 2 (269) |
| Alaudidae | Alaudidae       | Eremalauda    | starki          | Pair          | Africa     | Resident  |          | (269)   |
| Alaudidae | Alaudidae       | Eremalauda    | dunni           | Pair          | Africa     | Resident  |          | 2 (269) |
| Alaudidae | Alaudidae       | Chersophilus  | duponti         | Pair          | Paleartic  | Resident  |          | 3 (269) |
| Alaudidae | Alaudidae       | Galerida      | cristata        | Occasional    | Widespread |           | Partial  | 4 (103) |
| Alaudidae | Alaudidae       | Galerida      | theklae         | Pair          | Widespread |           | Resident | 5 (269) |
| Alaudidae | Alaudidae       | Galerida      | malabarica      | Pair          | se Asia    | Resident  |          | 2 (6)   |
| Alaudidae | Alaudidae       | Galerida      | deva            | Pair          | se Asia    | Resident  |          | 2 (6)   |
| Alaudidae | Alaudidae       | Galerida      | modesta         | Unknown       | Africa     | Resident  |          | 1 (269) |
| Alaudidae | Alaudidae       | Galerida      | magnirostris    | Pair          | Africa     | Resident  |          | 3 (269) |
| Alaudidae | Alaudidae       | Pseudalaemon  | fremantlii      | Unknown       | Africa     | Resident  |          | 3 (269) |
| Alaudidae | Alaudidae       | Lullula       | arborea         | Pair          | Paleartic  | Partial   |          | 4 (103) |
| Alaudidae | Alaudidae       | Alauda        | arvensis        | Pair          | Paleartic  | Partial   |          | 4 (103) |
| Alaudidae | Alaudidae       | Alauda        | japonica        | Unknown       | Paleartic  | Partial   |          | (103)   |
| Alaudidae | Alaudidae       | Alauda        | gulgula         | Pair          | Paleartic  | Partial   |          | 3 (103) |
| Alaudidae | Alaudidae       | Alauda        | razae           | Pair          | Paleartic  | Resident  | Endemic  | 3 (103) |

| Family                      | Clade Reference | Genus       | species         | Parental care | Region      | Movement | Island  | Clutch       |
|-----------------------------|-----------------|-------------|-----------------|---------------|-------------|----------|---------|--------------|
| Alaudidae                   | Alaudidae       | Eremophila  | alpestris       | Occasional    | Palaearctic | Partial  |         | 4 (38, 39)   |
| Alaudidae                   | Alaudidae       | Eremophila  | bilopha         | Pair          | Palaearctic | Partial  |         | 3 (269)      |
| Cisticolidae                | Cisticolidae    | Cisticola   | erythroptus     | Pair          | Africa      | Resident |         | 3 (496)      |
| Cisticolidae                | Cisticolidae    | Cisticola   | lepe            | Unknown       | Africa      | Resident |         | (496)        |
| Cisticolidae                | Cisticolidae    | Cisticola   | cantans         | Pair          | Africa      | Resident |         | 3 (496)      |
| Cisticolidae                | Cisticolidae    | Cisticola   | lateralis       | Unknown       | Africa      | Resident |         | 2 (496)      |
| Cisticolidae                | Cisticolidae    | Cisticola   | anonymus        | Cooperation   | Africa      | Resident |         | 2 (496)      |
| Cisticolidae                | Cisticolidae    | Cisticola   | woosnami        | Unknown       | Africa      | Resident |         | 2 (496)      |
| Cisticolidae                | Cisticolidae    | Cisticola   | bulliens        | Unknown       | Africa      | Resident |         | 3 (496)      |
| Cisticolidae                | Cisticolidae    | Cisticola   | discolor        | Unknown       | Africa      | Resident |         | (496)        |
| Cisticolidae                | Cisticolidae    | Cisticola   | chubbi          | Pair          | Africa      | Resident |         | 3 (496)      |
| Cisticolidae                | Cisticolidae    | Cisticola   | hunteri         | Pair          | Africa      | Resident |         | 3 (496)      |
| Cisticolidae                | Cisticolidae    | Cisticola   | nigriloris      | Cooperation   | Africa      | Resident |         | 3 (496)      |
| Cisticolidae                | Cisticolidae    | Cisticola   | emini           | Unknown       | Africa      | Resident |         | (496)        |
| Cisticolidae                | Cisticolidae    | Cisticola   | aberrans        | Pair          | Africa      | Resident |         | 3 (496)      |
| Cisticolidae                | Cisticolidae    | Cisticola   | bodessa         | Unknown       | Africa      | Resident |         | 4 (496)      |
| Cisticolidae                | Cisticolidae    | Cisticola   | chinianus       | Cooperation   | Africa      | Resident |         | 4 (66)       |
| Cisticolidae                | Cisticolidae    | Cisticola   | cinereolus      | Cooperation   | Africa      | Resident |         | 4 (496)      |
| Cisticolidae                | Cisticolidae    | Cisticola   | ruficeps        | Unknown       | Africa      | Resident |         | 4 (496)      |
| Cisticolidae                | Cisticolidae    | Cisticola   | mongalla        | Unknown       | Africa      | Resident |         | 4 (496)      |
| Cisticolidae                | Cisticolidae    | Cisticola   | dorsti          | Unknown       | Africa      | Resident |         | (496)        |
| Cisticolidae                | Cisticolidae    | Cisticola   | rufilatus       | Pair          | Africa      | Resident |         | 3 (496)      |
| Cisticolidae                | Cisticolidae    | Cisticola   | subruficapillus | Pair          | Africa      | Resident |         | 3 (496)      |
| Cisticolidae                | Cisticolidae    | Cisticola   | lais            | Unknown       | Africa      | Resident |         | 3 (496)      |
| Cisticolidae                | Cisticolidae    | Cisticola   | distinctus      | Unknown       | Africa      | Resident |         | (496)        |
| Cisticolidae                | Cisticolidae    | Cisticola   | restrictus      | Unknown       | Africa      | Resident |         | (496)        |
| Cisticolidae                | Cisticolidae    | Cisticola   | njombe          | Unknown       | Africa      | Resident |         | 3 (496)      |
| Cisticolidae                | Cisticolidae    | Cisticola   | galactotes      | Pair          | Africa      | Resident |         | 3 (496)      |
| Cisticolidae                | Cisticolidae    | Cisticola   | pipiens         | Unknown       | Africa      | Resident |         | 3 (245, 496) |
| Cisticolidae                | Cisticolidae    | Cisticola   | carruthersi     | Unknown       | Africa      | Resident |         | 3 (496)      |
| Cisticolidae                | Cisticolidae    | Cisticola   | tinniens        | Pair          | Africa      | Resident |         | 3 (496)      |
| Cisticolidae                | Cisticolidae    | Cisticola   | angolensis      | Unknown       | Africa      | Resident |         | (496)        |
| Cisticolidae                | Cisticolidae    | Cisticola   | robustus        | Cooperation   | Africa      | Resident |         | 3 (382)      |
| Cisticolidae                | Cisticolidae    | Cisticola   | aberdare        | Unknown       | Africa      | Resident |         | (496)        |
| Cisticolidae                | Cisticolidae    | Cisticola   | natalensis      | Unknown       | Africa      | Resident |         | 3 (496)      |
| Cisticolidae                | Cisticolidae    | Cisticola   | fulvicapillus   | Pair          | Africa      | Resident |         | 4 (496)      |
| Cisticolidae                | Cisticolidae    | Cisticola   | angusticauda    | Pair          | Africa      | Resident |         | 3 (496)      |
| Cisticolidae                | Cisticolidae    | Cisticola   | melanurus       | Unknown       | Africa      | Resident |         | (496)        |
| Cisticolidae                | Cisticolidae    | Cisticola   | brachypterus    | Pair          | Africa      | Resident |         | 3 (496)      |
| Cisticolidae                | Cisticolidae    | Cisticola   | rufus           | Unknown       | Africa      | Resident |         | (496)        |
| Cisticolidae                | Cisticolidae    | Cisticola   | trogodytes      | Unknown       | Africa      | Resident |         | (496)        |
| Cisticolidae                | Cisticolidae    | Cisticola   | nanus           | Unknown       | Africa      | Resident |         | 4 (496)      |
| Cisticolidae                | Cisticolidae    | Cisticola   | incanus         | Unknown       | Africa      | Resident | Endemic | (496)        |
| Cisticolidae                | Cisticolidae    | Cisticola   | juncidis        | Pair          | Widespread  | Resident | Endemic | 3 (496)      |
| Cisticolidae                | Cisticolidae    | Cisticola   | haesitatus      | Unknown       | Africa      | Resident | Endemic | (46)         |
| Cisticolidae                | Cisticolidae    | Cisticola   | cherinus        | Unknown       | Africa      | Resident |         | 4 (496)      |
| Cisticolidae                | Cisticolidae    | Cisticola   | aridulus        | Pair          | Africa      | Resident |         | (496)        |
| Cisticolidae                | Cisticolidae    | Cisticola   | textrix         | Pair          | Africa      | Resident |         | 3 (496)      |
| Cisticolidae                | Cisticolidae    | Cisticola   | eximius         | Unknown       | Africa      | Resident |         | 3 (246, 496) |
| Cisticolidae                | Cisticolidae    | Cisticola   | dambo           | Pair          | Africa      | Resident |         | 2 (496)      |
| Cisticolidae                | Cisticolidae    | Cisticola   | brunnescens     | Pair          | Africa      | Resident |         | 3 (496)      |
| Cisticolidae                | Cisticolidae    | Cisticola   | ayresii         | Pair          | Africa      | Resident |         | 3 (496)      |
| Cisticolidae<br>(pers comm) | Cisticolidae    | Cisticola   | exilis          | Pair          | Australia   | Resident |         | M.J. Lewis   |
| Cisticolidae                | Cisticolidae    | Scotocerca  | inquieta        | Pair          | Palaearctic | Resident |         | (496)        |
| Cisticolidae                | Cisticolidae    | Rhopophilus | pekinensis      | Unknown       | Palaearctic | Resident |         | (320)        |
| Cisticolidae                | Cisticolidae    | Prinia      | burnesii        | Unknown       | se Asia     | Resident |         | 4 (8)        |
| Cisticolidae                | Cisticolidae    | Prinia      | criniger        | Pair          | se Asia     | Resident |         | 4 (8)        |
| Cisticolidae                | Cisticolidae    | Prinia      | polychroa       | Unknown       | se Asia     | Resident |         | (319)        |
| Cisticolidae                | Cisticolidae    | Prinia      | atrogularis     | Pair          | se Asia     | Resident |         | 4 (8)        |
| Cisticolidae                | Cisticolidae    | Prinia      | cinereocapilla  | Unknown       | se Asia     | Resident |         | (92)         |
| Cisticolidae                | Cisticolidae    | Prinia      | buchanani       | Pair          | se Asia     | Resident |         | 4 (8)        |
| Cisticolidae                | Cisticolidae    | Prinia      | rufescens       | Pair          | se Asia     | Resident |         | (8)          |
| Cisticolidae                | Cisticolidae    | Prinia      | hodgsonii       | Pair          | se Asia     | Resident |         | 3 (8)        |
| Cisticolidae                | Cisticolidae    | Prinia      | gracilis        | Pair          | Palaearctic | Resident |         | 4 (104)      |
| Cisticolidae                | Cisticolidae    | Prinia      | syllvatica      | Pair          | se Asia     | Resident |         | 4 (8)        |
| Cisticolidae                | Cisticolidae    | Prinia      | familiaris      | Unknown       | se Asia     | Resident |         | (319)        |
| Cisticolidae                | Cisticolidae    | Prinia      | flaviventris    | Pair          | se Asia     | Resident |         | 4 (298)      |
| Cisticolidae                | Cisticolidae    | Prinia      | socialis        | Pair          | se Asia     | Resident |         | 4 (8)        |
| Cisticolidae                | Cisticolidae    | Prinia      | subflava        | Cooperation   | Africa      | Resident |         | (382)        |
| Cisticolidae                | Cisticolidae    | Prinia      | somalica        | Unknown       | Africa      | Resident |         | (496)        |
| Cisticolidae                | Cisticolidae    | Prinia      | inornata        | Pair          | Africa      | Resident |         | 4 (298)      |
| Cisticolidae                | Cisticolidae    | Prinia      | fluviatilis     | Unknown       | Africa      | Resident |         | (496)        |

| Family       | Clade Reference | Genus        | species          | Parental care | Region    | Movement    | Island  | Clutch            |
|--------------|-----------------|--------------|------------------|---------------|-----------|-------------|---------|-------------------|
| Cisticolidae | Cisticolidae    | Prinia       | flavicans        | Pair          | Africa    | Resident    |         | 3 (496)           |
| Cisticolidae | Cisticolidae    | Prinia       | maculosa         | Pair          | Africa    | Resident    |         | 3 (496)           |
| Cisticolidae | Cisticolidae    | Prinia       | molleri          | Pair          | Africa    | Resident    |         | 3 (496)           |
| Cisticolidae | Cisticolidae    | Prinia       | leontica         | Unknown       | Africa    | Resident    | Endemic | 2 (22, 496)       |
| Cisticolidae | Cisticolidae    | Prinia       | leucopogon       | Pair          | Africa    | Resident    |         | 2 (496)           |
| Cisticolidae | Cisticolidae    | Prinia       | bairdii          | Unknown       | Africa    | Resident    |         | 2 (496)           |
| Cisticolidae | Cisticolidae    | Prinia       | melanops         | Suspected     | Africa    | Resident    |         | 2 (496)           |
| Cisticolidae | Cisticolidae    | Phragmacia   | substriata       | Cooperation   | Africa    | Resident    |         | 3 (496)           |
| Cisticolidae | Cisticolidae    | Oreophilais  | robertsi         | Unknown       | Africa    | Resident    |         | (496)             |
| Cisticolidae | Cisticolidae    | Heliolais    | erythroptera     | Unknown       | Africa    | Partial     |         | 2 (496)           |
| Cisticolidae | Cisticolidae    | Malcorus     | pectoralis       | Pair          | Africa    | Resident    |         | 4 (496)           |
| Cisticolidae | Cisticolidae    | Drymocichla  | incana           | Unknown       | Africa    | Resident    |         | (496)             |
| Cisticolidae | Cisticolidae    | Urolais      | epichlora        | Unknown       | Africa    | Resident    |         | (496)             |
| Cisticolidae | Cisticolidae    | Spiloptila   | clamans          | Unknown       | Africa    | Resident    |         | 3 (496)           |
| Cisticolidae | Cisticolidae    | Apalis       | pulchra          | Pair          | Africa    | Resident    |         | 2 (496)           |
| Cisticolidae | Cisticolidae    | Apalis       | ruwenzorii       | Pair          | Africa    | Resident    |         | 2 (496)           |
| Cisticolidae | Cisticolidae    | Apalis       | thoracica        | Pair          | Africa    | Resident    |         | 3 (496)           |
| Cisticolidae | Cisticolidae    | Apalis       | nigriceps        | Unknown       | Africa    | Resident    |         | (496)             |
| Cisticolidae | Cisticolidae    | Apalis       | jacksoni         | Unknown       | Africa    | Resident    |         | 2 (496)           |
| Cisticolidae | Cisticolidae    | Apalis       | chariessa        | Pair          | Africa    | Resident    |         | 2 (496)           |
| Cisticolidae | Cisticolidae    | Apalis       | binotata         | Pair          | Africa    | Resident    |         | 1 (496)           |
| Cisticolidae | Cisticolidae    | Apalis       | personata        | Unknown       | Africa    | Resident    |         | (496)             |
| Cisticolidae | Cisticolidae    | Apalis       | flavida          | Pair          | Africa    | Resident    |         | 3 (496)           |
| Cisticolidae | Cisticolidae    | Apalis       | viridiceps       | Unknown       | Africa    | Resident    |         | (496)             |
| Cisticolidae | Cisticolidae    | Apalis       | ruddi            | Pair          | Africa    | Resident    |         | 2 (496)           |
| Cisticolidae | Cisticolidae    | Apalis       | sharpii          | Unknown       | Africa    | Resident    |         | (496)             |
| Cisticolidae | Cisticolidae    | Apalis       | rufogularis      | Unknown       | Africa    | Resident    |         | (496)             |
| Cisticolidae | Cisticolidae    | Apalis       | argentea         | Unknown       | Africa    | Resident    |         | (496)             |
| Cisticolidae | Cisticolidae    | Apalis       | bamendae         | Unknown       | Africa    | Resident    |         | (496)             |
| Cisticolidae | Cisticolidae    | Apalis       | goslingi         | Unknown       | Africa    | Resident    |         | (496)             |
| Cisticolidae | Cisticolidae    | Apalis       | porphyrolaema    | Unknown       | Africa    | Resident    |         | (496)             |
| Cisticolidae | Cisticolidae    | Apalis       | kaboboensis      | Unknown       | Africa    | Resident    |         | (496)             |
| Cisticolidae | Cisticolidae    | Apalis       | chapini          | Pair          | Africa    | Resident    |         | (496)             |
| Cisticolidae | Cisticolidae    | Apalis       | melanocephala    | Suspected     | Africa    | Resident    |         | 2 (496)           |
| Cisticolidae | Cisticolidae    | Apalis       | chirindensis     | Pair          | Africa    | Resident    |         | (496)             |
| Cisticolidae | Cisticolidae    | Apalis       | cinerea          | Unknown       | Africa    | Resident    |         | 3 (496)           |
| Cisticolidae | Cisticolidae    | Apalis       | alticola         | Unknown       | Africa    | Resident    |         | (496)             |
| Cisticolidae | Cisticolidae    | Apalis       | karamojae        | Unknown       | Africa    | Resident    |         | (496)             |
| Cisticolidae | Cisticolidae    | Apalis       | ruffrongs        | Pair          | Africa    | Resident    |         | 3 (496)           |
| Cisticolidae | Cisticolidae    | Hypergerus   | atriceps         | Pair          | Africa    | Resident    |         | 3 (496)           |
| Cisticolidae | Cisticolidae    | Eminia       | lepida           | Pair          | Africa    | Resident    |         | 2 (496)           |
| Cisticolidae | Cisticolidae    | Camaroptera  | brevicaudata     | Pair          | Africa    | Resident    |         | (496)             |
| Cisticolidae | Cisticolidae    | Camaroptera  | harterti         | Pair          | Africa    | Resident    |         | (496)             |
| Cisticolidae | Cisticolidae    | Camaroptera  | brachyura        | Pair          | Africa    | Resident    |         | 3 (496)           |
| Cisticolidae | Cisticolidae    | Camaroptera  | superciliaris    | Pair          | Africa    | Resident    |         | 3 (496)           |
| Cisticolidae | Cisticolidae    | Camaroptera  | chloronota       | Pair          | Africa    | Resident    |         | (496)             |
| Cisticolidae | Cisticolidae    | Calamonastes | simplex          | Pair          | Africa    | Resident    |         | 3 (496)           |
| Cisticolidae | Cisticolidae    | Calamonastes | stierlingi       | Pair          | Africa    | Resident    |         | 2 (496)           |
| Cisticolidae | Cisticolidae    | Calamonastes | fasciolatus      | Pair          | Africa    | Resident    |         | 3 (496)           |
| Cisticolidae | Cisticolidae    | Euryptila    | subcinnamomea    | Unknown       | Africa    | Resident    |         | 2 (496)           |
| Sylviidae    | Acrocephalinae  | Tesia        | castaneocoronata | Pair          | se Asia   | Partial     |         | 2 (8)             |
| Sylviidae    | Acrocephalinae  | Tesia        | olivea           | Unknown       | se Asia   | Partial     |         | (8)               |
| Sylviidae    | Acrocephalinae  | Tesia        | cyaniventer      | Unknown       | se Asia   | Partial     |         | 4 (8)             |
| Sylviidae    | Acrocephalinae  | Tesia        | superciliaris    | Unknown       | se Asia   | Resident    |         | (319)             |
| Sylviidae    | Acrocephalinae  | Tesia        | everetti         | Unknown       | se Asia   | Resident    | Endemic | (88)              |
| Sylviidae    | Acrocephalinae  | Urosphena    | subulata         | Unknown       | se Asia   | Resident    | Endemic | (88)              |
| Sylviidae    | Acrocephalinae  | Urosphena    | whiteheadi       | Unknown       | se Asia   | Resident    |         | (459)             |
| Sylviidae    | Acrocephalinae  | Urosphena    | squameiceps      | Cooperation   | Paleartic | Migration   |         | 6 (372, 373)      |
| Sylviidae    | Acrocephalinae  | Cettia       | pallidipes       | Unknown       | Paleartic | Altitudinal |         | 4 (8)             |
| Sylviidae    | Acrocephalinae  | Cettia       | canturians       | Unknown       | Paleartic | Migration   |         | (320)             |
| Sylviidae    | Acrocephalinae  | Cettia       | diphone          | Uniparental   | Paleartic | Partial     |         | 5 (214, 216, 506) |
| Sylviidae    | Acrocephalinae  | Cettia       | seebohmi         | Unknown       | se Asia   | Resident    |         | (271)             |
| Sylviidae    | Acrocephalinae  | Cettia       | annae            | Unknown       | se Asia   | Resident    | Endemic | no source         |
| Sylviidae    | Acrocephalinae  | Cettia       | parens           | Unknown       | Australia | Resident    | Endemic | no source         |
| Sylviidae    | Acrocephalinae  | Cettia       | ruficapilla      | Pair          | Australia | Resident    | Endemic | 2 (508)           |
| Sylviidae    | Acrocephalinae  | Cettia       | fortipes         | Unknown       | Australia | Resident    | Endemic | (46)              |
| Sylviidae    | Acrocephalinae  | Cettia       | vulcania         | Pair          | se Asia   | Altitudinal |         | 4 (8)             |
| Sylviidae    | Acrocephalinae  | Cettia       | carolinae        | Unknown       | se Asia   | Resident    |         | (271)             |
| Sylviidae    | Acrocephalinae  | Cettia       | major            | Unknown       | Paleartic | Resident    |         | (8)               |
| Sylviidae    | Acrocephalinae  | Cettia       | flavolivacea     | Unknown       | Paleartic | Altitudinal |         | 3 (8)             |
| Sylviidae    | Acrocephalinae  | Cettia       | acanthizoides    | Unknown       | Paleartic | Altitudinal |         | 2 (8)             |
| Sylviidae    | Acrocephalinae  | Cettia       | brunnifrons      | Unknown       | Paleartic | Altitudinal |         | (8)               |

| Family    | Clade<br>Reference | Genus         | species        | Parental care | Region      | Movement    | Island  | Clutch       |
|-----------|--------------------|---------------|----------------|---------------|-------------|-------------|---------|--------------|
| Sylviidae | Acrocephalinae     | Cettia        | cetti          | Pair          | Palaearctic | Partial     |         | 5 (104)      |
| Sylviidae | Acrocephalinae     | Bradypterus   | baboecala      | Pair          | Africa      | Resident    |         | 2 (496)      |
| Sylviidae | Acrocephalinae     | Bradypterus   | grandis        | Pair          | Africa      | Resident    |         | (496)        |
| Sylviidae | Acrocephalinae     | Bradypterus   | carpalis       | Unknown       | Africa      | Resident    |         | (496)        |
| Sylviidae | Acrocephalinae     | Bradypterus   | graueri        | Unknown       | Africa      | Resident    |         | (496)        |
| Sylviidae | Acrocephalinae     | Bradypterus   | alfredi        | Unknown       | Africa      | Resident    |         | (496)        |
| Sylviidae | Acrocephalinae     | Bradypterus   | sylvaticus     | Pair          | Africa      | Resident    |         | 2 (496)      |
| Sylviidae | Acrocephalinae     | Bradypterus   | lopezi         | Pair          | Africa      | Resident    |         | 2 (496)      |
| Sylviidae | Acrocephalinae     | Bradypterus   | mariae         | Unknown       | Africa      | Resident    |         | (496)        |
| Sylviidae | Acrocephalinae     | Bradypterus   | barratti       | Pair          | Africa      | Resident    |         | 2 (496)      |
| Sylviidae | Acrocephalinae     | Bradypterus   | cinnamomeus    | Pair          | Africa      | Resident    |         | 2 (496)      |
| Sylviidae | Acrocephalinae     | Bradypterus   | victorini      | Pair          | Africa      | Resident    |         | 2 (496)      |
| Sylviidae | Acrocephalinae     | Bradypterus   | thoracicus     | Unknown       | Palaearctic | Altitudinal |         | 3 (8)        |
| Sylviidae | Acrocephalinae     | Bradypterus   | major          | Unknown       | Palaearctic | Altitudinal |         | 3 (8)        |
| Sylviidae | Acrocephalinae     | Bradypterus   | tacsanowskii   | Pair          | Palaearctic | Migration   |         | 5 (158)      |
| Sylviidae | Acrocephalinae     | Bradypterus   | luteoventris   | Pair          | Palaearctic | Altitudinal |         | 4 (8)        |
| Sylviidae | Acrocephalinae     | Bradypterus   | seebohmi       | Unknown       | se Asia     | Resident    |         | (271)        |
| Sylviidae | Acrocephalinae     | Bradypterus   | palliseri      | Pair          | se Asia     | Resident    |         | 2 (8)        |
| Sylviidae | Acrocephalinae     | Bradypterus   | caudatus       | Unknown       | se Asia     | Resident    |         | (271)        |
| Sylviidae | Acrocephalinae     | Bradypterus   | accentor       | Unknown       | se Asia     | Resident    |         | (459)        |
| Sylviidae | Acrocephalinae     | Bradypterus   | castaneus      | Unknown       | se Asia     | Resident    | Endemic | (88)         |
| Sylviidae | Acrocephalinae     | Dromaeocercus | brunneus       | Unknown       | Africa      | Resident    |         | (284)        |
| Sylviidae | Acrocephalinae     | Bathmocercus  | cerviniventris | Unknown       | Africa      | Resident    |         | (496)        |
| Sylviidae | Acrocephalinae     | Bathmocercus  | rufus          | Pair          | Africa      | Resident    |         | 2 (496)      |
| Sylviidae | Acrocephalinae     | Scepomycter   | winifredae     | Unknown       | Africa      | Resident    |         | (496)        |
| Sylviidae | Acrocephalinae     | Nesillas      | aldabrana      | Unknown       | Africa      | Resident    |         | (402, 452)   |
| Sylviidae | Acrocephalinae     | Nesillas      | longicaudata   | Unknown       | Africa      | Resident    | Endemic | no source    |
| Sylviidae | Acrocephalinae     | Nesillas      | typica         | Unknown       | Africa      | Resident    |         | 2 (284)      |
| Sylviidae | Acrocephalinae     | Nesillas      | brevicaudata   | Unknown       | Africa      | Resident    | Endemic | no source    |
| Sylviidae | Acrocephalinae     | Nesillas      | mariae         | Unknown       | Africa      | Resident    | Endemic | no source    |
| Sylviidae | Acrocephalinae     | Thamnornis    | chloropetoides | Unknown       | Africa      | Resident    |         | 3 (284)      |
| Sylviidae | Acrocephalinae     | Melocichla    | mentalis       | Pair          | Africa      | Resident    |         | 2 (496)      |
| Sylviidae | Acrocephalinae     | Achaetops     | pycnopygius    | Pair          | Africa      | Resident    |         | 2 (174)      |
| Sylviidae | Acrocephalinae     | Sphenoeacus   | afer           | Pair          | Africa      | Resident    |         | 2 (496)      |
| Sylviidae | Acrocephalinae     | Locustella    | lanceolata     | Pair          | Palaearctic | Migration   |         | 4 (104)      |
| Sylviidae | Acrocephalinae     | Locustella    | naevia         | Pair          | Palaearctic | Migration   |         | 6 (104)      |
| Sylviidae | Acrocephalinae     | Locustella    | certhiola      | Pair          | Palaearctic | Migration   |         | (104)        |
| Sylviidae | Acrocephalinae     | Locustella    | ochotensis     | Pair          | Palaearctic | Migration   |         | (353)        |
| Sylviidae | Acrocephalinae     | Locustella    | pleskei        | Pair          | Palaearctic | Migration   |         | 4 (92)       |
| Sylviidae | Acrocephalinae     | Locustella    | fluviatilis    | Pair          | Palaearctic | Migration   |         | 5 (104)      |
| Sylviidae | Acrocephalinae     | Locustella    | luscinioides   | Pair          | Palaearctic | Migration   |         | 5 (104)      |
| Sylviidae | Acrocephalinae     | Locustella    | fasciolata     | Pair          | Palaearctic | Migration   |         | (104)        |
| Sylviidae | Acrocephalinae     | Acrocephalus  | melanopogon    | Cooperation   | Palaearctic | Partial     |         | 5 (150)      |
| Sylviidae | Acrocephalinae     | Acrocephalus  | paludicola     | Uniparental   | Palaearctic | Migration   |         | 5 (104)      |
| Sylviidae | Acrocephalinae     | Acrocephalus  | schoenobaenus  | Pair          | Palaearctic | Migration   |         | 5 (104)      |
| Sylviidae | Acrocephalinae     | Acrocephalus  | sorghophilus   | Unknown       | Palaearctic | Migration   |         | (92)         |
| Sylviidae | Acrocephalinae     | Acrocephalus  | bistrigiceps   | Pair          | Palaearctic | Migration   |         | 4 (215, 217) |
| Sylviidae | Acrocephalinae     | Acrocephalus  | agricola       | Pair          | Palaearctic | Migration   |         | 5 (104)      |
| Sylviidae | Acrocephalinae     | Acrocephalus  | concinens      | Pair          | Palaearctic | Migration   |         | 3 (8)        |
| Sylviidae | Acrocephalinae     | Acrocephalus  | scirpaceus     | Pair          | Palaearctic | Migration   |         | 4 (104)      |
| Sylviidae | Acrocephalinae     | Acrocephalus  | baeticatus     | Cooperation   | Africa      | Resident    |         | (138)        |
| Sylviidae | Acrocephalinae     | Acrocephalus  | dumetorum      | Pair          | Palaearctic | Migration   |         | 6 (104)      |
| Sylviidae | Acrocephalinae     | Acrocephalus  | palustris      | Pair          | Palaearctic | Migration   |         | 5 (104)      |
| Sylviidae | Acrocephalinae     | Acrocephalus  | arundinaceus   | Pair          | Palaearctic | Migration   |         | 5 (104)      |
| Sylviidae | Acrocephalinae     | Acrocephalus  | stentoreus     | Pair          | Palaearctic | Partial     |         | 4 (104)      |
| Sylviidae | Acrocephalinae     | Acrocephalus  | griseldis      | Pair          | Palaearctic | Migration   |         | 4 (52)       |
| Sylviidae | Acrocephalinae     | Acrocephalus  | australis      | Pair          | Australia   | Migration   |         | 3 (47)       |
| Sylviidae | Acrocephalinae     | Acrocephalus  | luscinia       | Unknown       | se Asia     | Resident    | Endemic | (46)         |
| Sylviidae | Acrocephalinae     | Acrocephalus  | syrix          | Unknown       | se Asia     | Resident    | Endemic | no source    |
| Sylviidae | Acrocephalinae     | Acrocephalus  | rehsei         | Unknown       | se Asia     | Resident    | Endemic | no source    |
| Sylviidae | Acrocephalinae     | Acrocephalus  | familiaris     | Pair          | se Asia     | Resident    | Endemic | 2 (349)      |
| Sylviidae | Acrocephalinae     | Acrocephalus  | aequinoctialis | Pair          | Australia   | Resident    | Endemic | (340)        |
| Sylviidae | Acrocephalinae     | Acrocephalus  | caffer         | Unknown       | Australia   | Resident    | Endemic | (46)         |
| Sylviidae | Acrocephalinae     | Acrocephalus  | mendanae       | Unknown       | Australia   | Resident    | Endemic | no source    |
| Sylviidae | Acrocephalinae     | Acrocephalus  | atyphus        | Unknown       | Australia   | Resident    | Endemic | no source    |
| Sylviidae | Acrocephalinae     | Acrocephalus  | kerearako      | Unknown       | Australia   | Resident    | Endemic | (46)         |
| Sylviidae | Acrocephalinae     | Acrocephalus  | rimatarae      | Unknown       | Australia   | Resident    | Endemic | no source    |
| Sylviidae | Acrocephalinae     | Acrocephalus  | vaughani       | Unknown       | Australia   | Resident    | Endemic | no source    |
| Sylviidae | Acrocephalinae     | Acrocephalus  | taiti          | Cooperation   | Australia   | Resident    | Endemic | (56)         |
| Sylviidae | Acrocephalinae     | Acrocephalus  | rufescens      | Pair          | Africa      | Resident    |         | 2 (496)      |
| Sylviidae | Acrocephalinae     | Acrocephalus  | brevipennis    | Unknown       | Africa      | Resident    | Endemic | 2 (46)       |
| Sylviidae | Acrocephalinae     | Acrocephalus  | gracilirostris | Unknown       | Africa      | Resident    |         | 3 (496)      |
| Sylviidae | Acrocephalinae     | Acrocephalus  | newtoni        | Pair          | Africa      | Resident    |         | 3 (284)      |

| Family    | Clade Reference | Genus        | species         | Parental care | Region      | Movement  | Island  | Clutch       |
|-----------|-----------------|--------------|-----------------|---------------|-------------|-----------|---------|--------------|
| Sylviidae | Acrocephalinae  | Acrocephalus | aedon           | Pair          | Palaearctic | Migration |         | 4 (104)      |
| Sylviidae | Acrocephalinae  | Acrocephalus | rodericanus     | Pair          | Africa      | Resident  | Endemic | 4 (71)       |
| Sylviidae | Acrocephalinae  | Acrocephalus | sechellensis    | Cooperation   | Africa      | Resident  | Endemic | (278)        |
| Sylviidae | Acrocephalinae  | Hippolais    | caligata        | Pair          | Palaearctic | Migration |         | 5 (104)      |
| Sylviidae | Acrocephalinae  | Hippolais    | rama            | Unknown       | Palaearctic | Migration |         | (104)        |
| Sylviidae | Acrocephalinae  | Hippolais    | pallida         | Pair          | Palaearctic | Partial   |         | 4 (104)      |
| Sylviidae | Acrocephalinae  | Hippolais    | languida        | Pair          | Palaearctic | Migration |         | 4 (104)      |
| Sylviidae | Acrocephalinae  | Hippolais    | olivetorum      | Pair          | Palaearctic | Migration |         | 4 (104)      |
| Sylviidae | Acrocephalinae  | Hippolais    | polyglotta      | Pair          | Palaearctic | Migration |         | 4 (104)      |
| Sylviidae | Acrocephalinae  | Hippolais    | icterina        | Pair          | Palaearctic | Migration |         | 5 (71)       |
| Sylviidae | Acrocephalinae  | Chloropeta   | natalensis      | Pair          | Africa      | Resident  |         | 2 (496)      |
| Sylviidae | Acrocephalinae  | Chloropeta   | similis         | Pair          | Africa      | Resident  |         | 2 (496)      |
| Sylviidae | Acrocephalinae  | Chloropeta   | gracilirostris  | Unknown       | Africa      | Resident  |         | (496)        |
| Sylviidae | Acrocephalinae  | Stenostira   | scita           | Pair          | Africa      | Migration |         | 2 (496)      |
| Sylviidae | Acrocephalinae  | Phyllolais   | pulchella       | Unknown       | Africa      | Resident  |         | 3 (496)      |
| Sylviidae | Acrocephalinae  | Orthotomus   | metopias        | Unknown       | Africa      | Resident  |         | 2 (496)      |
| Sylviidae | Acrocephalinae  | Orthotomus   | moreaui         | Unknown       | Africa      | Resident  |         | (496)        |
| Sylviidae | Acrocephalinae  | Orthotomus   | cuclulatus      | Unknown       | se Asia     | Resident  |         | 3 (271)      |
| Sylviidae | Acrocephalinae  | Orthotomus   | heterolaemus    | Unknown       | se Asia     | Resident  |         | (271)        |
| Sylviidae | Acrocephalinae  | Orthotomus   | sutorius        | Pair          | se Asia     | Resident  |         | 4 (8)        |
| Sylviidae | Acrocephalinae  | Orthotomus   | atrogularis     | Pair          | se Asia     | Resident  |         | 4 (8)        |
| Sylviidae | Acrocephalinae  | Orthotomus   | castaneiceps    | Unknown       | se Asia     | Resident  |         | 2 (271)      |
| Sylviidae | Acrocephalinae  | Orthotomus   | frontalis       | Unknown       | se Asia     | Resident  |         | (271)        |
| Sylviidae | Acrocephalinae  | Orthotomus   | derbianus       | Unknown       | se Asia     | Resident  |         | (271)        |
| Sylviidae | Acrocephalinae  | Orthotomus   | sericeus        | Unknown       | se Asia     | Resident  |         | 2 (271)      |
| Sylviidae | Acrocephalinae  | Orthotomus   | ruficeps        | Unknown       | se Asia     | Resident  |         | (271)        |
| Sylviidae | Acrocephalinae  | Orthotomus   | sepium          | Unknown       | se Asia     | Resident  | Endemic | (88)         |
| Sylviidae | Acrocephalinae  | Orthotomus   | samarensis      | Unknown       | se Asia     | Resident  |         | (271)        |
| Sylviidae | Acrocephalinae  | Orthotomus   | nigriceps       | Unknown       | se Asia     | Resident  |         | (271)        |
| Sylviidae | Acrocephalinae  | Orthotomus   | cinereiceps     | Unknown       | se Asia     | Resident  |         | (271)        |
| Sylviidae | Acrocephalinae  | Poliolais    | lopezi          | Pair          | Africa      | Resident  |         | 1 (496)      |
| Sylviidae | Acrocephalinae  | Graueria     | vittata         | Unknown       | Africa      | Resident  |         | (496)        |
| Sylviidae | Acrocephalinae  | Eremomela    | icteropygialis  | Unknown       | Africa      | Resident  |         | 2 (496)      |
| Sylviidae | Acrocephalinae  | Eremomela    | salvadorii      | Unknown       | Africa      | Resident  |         | (496)        |
| Sylviidae | Acrocephalinae  | Eremomela    | flavicrissalis  | Unknown       | Africa      | Resident  |         | 1 (496)      |
| Sylviidae | Acrocephalinae  | Eremomela    | pusilla         | Cooperation   | Africa      | Resident  |         | 2 (496)      |
| Sylviidae | Acrocephalinae  | Eremomela    | canescens       | Cooperation   | Africa      | Resident  |         | 1 (496)      |
| Sylviidae | Acrocephalinae  | Eremomela    | scotops         | Cooperation   | Africa      | Resident  |         | 2 (496)      |
| Sylviidae | Acrocephalinae  | Eremomela    | gregalis        | Cooperation   | Africa      | Resident  |         | 3 (91)       |
| Sylviidae | Acrocephalinae  | Eremomela    | badiceps        | Cooperation   | Africa      | Resident  |         | (496)        |
| Sylviidae | Acrocephalinae  | Eremomela    | turneri         | Unknown       | Africa      | Resident  |         | (496)        |
| Sylviidae | Acrocephalinae  | Eremomela    | atricollis      | Cooperation   | Africa      | Resident  |         | 2 (496)      |
| Sylviidae | Acrocephalinae  | Eremomela    | usticollis      | Cooperation   | Africa      | Resident  |         | 3 (496)      |
| Sylviidae | Acrocephalinae  | Randia       | pseudozosterops | Unknown       | Africa      | Resident  |         | (284)        |
| Sylviidae | Acrocephalinae  | Newtonia     | amphichroa      | Unknown       | Africa      | Resident  |         | (284)        |
| Sylviidae | Acrocephalinae  | Newtonia     | brunneicauda    | Unknown       | Africa      | Resident  |         | (284)        |
| Sylviidae | Acrocephalinae  | Newtonia     | archboldi       | Unknown       | Africa      | Resident  |         | (284)        |
| Sylviidae | Acrocephalinae  | Newtonia     | fanovanae       | Unknown       | Africa      | Resident  |         | (284)        |
| Sylviidae | Acrocephalinae  | Sylvietta    | virens          | Cooperation   | Africa      | Resident  |         | 2 (496)      |
| Sylviidae | Acrocephalinae  | Sylvietta    | denti           | Pair          | Africa      | Resident  |         | 2 (496)      |
| Sylviidae | Acrocephalinae  | Sylvietta    | chapini         | Unknown       | Africa      | Resident  |         | (496)        |
| Sylviidae | Acrocephalinae  | Sylvietta    | leucophrys      | Pair          | Africa      | Resident  |         | 2 (496)      |
| Sylviidae | Acrocephalinae  | Sylvietta    | brachyura       | Pair          | Africa      | Resident  |         | 2 (496)      |
| Sylviidae | Acrocephalinae  | Sylvietta    | philippae       | Unknown       | Africa      | Resident  |         | (496)        |
| Sylviidae | Acrocephalinae  | Sylvietta    | ruficapilla     | Pair          | Africa      | Resident  |         | 2 (496)      |
| Sylviidae | Acrocephalinae  | Sylvietta    | whytii          | Pair          | Africa      | Resident  |         | 2 (496)      |
| Sylviidae | Acrocephalinae  | Sylvietta    | isabellina      | Unknown       | Africa      | Resident  |         | 2 (496)      |
| Sylviidae | Acrocephalinae  | Sylvietta    | rufescens       | Pair          | Africa      | Resident  |         | 2 (496)      |
| Sylviidae | Acrocephalinae  | Hemitesia    | neumanni        | Unknown       | Africa      | Resident  |         | (496)        |
| Sylviidae | Acrocephalinae  | Macrosphenus | kempi           | Unknown       | Africa      | Resident  |         | (496)        |
| Sylviidae | Acrocephalinae  | Macrosphenus | flavicans       | Unknown       | Africa      | Resident  |         | (496)        |
| Sylviidae | Acrocephalinae  | Macrosphenus | concolor        | Unknown       | Africa      | Resident  |         | (496)        |
| Sylviidae | Acrocephalinae  | Macrosphenus | pulitzeri       | Unknown       | Africa      | Resident  |         | (496)        |
| Sylviidae | Acrocephalinae  | Macrosphenus | kretschmeri     | Unknown       | Africa      | Resident  |         | (496)        |
| Sylviidae | Acrocephalinae  | Amaurocichla | bocagii         | Unknown       | Africa      | Resident  | Endemic | (496)        |
| Sylviidae | Acrocephalinae  | Hylia        | prasina         | Unknown       | Africa      | Resident  |         | (496)        |
| Sylviidae | Acrocephalinae  | Phylloscopus | laetus          | Pair          | Africa      | Resident  |         | 2 (496)      |
| Sylviidae | Acrocephalinae  | Phylloscopus | laurae          | Unknown       | Africa      | Resident  |         | (496)        |
| Sylviidae | Acrocephalinae  | Phylloscopus | ruficapillus    | Pair          | Africa      | Partial   |         | 3 (496)      |
| Sylviidae | Acrocephalinae  | Phylloscopus | herberti        | Unknown       | Africa      | Resident  |         | (496)        |
| Sylviidae | Acrocephalinae  | Phylloscopus | budongoensis    | Unknown       | Africa      | Resident  |         | 3 (496)      |
| Sylviidae | Acrocephalinae  | Phylloscopus | umbrovirens     | Pair          | Africa      | Resident  |         | 2 (496)      |
| Sylviidae | Acrocephalinae  | Phylloscopus | trochilus       | Occasional    | Palaearctic | Migration |         | 6 (104, 289) |

| Family      | Clade Reference | Genus           | species        | Parental care | Region    | Movement    | Island  | Clutch        |
|-------------|-----------------|-----------------|----------------|---------------|-----------|-------------|---------|---------------|
| Sylviidae   | Acrocephalinae  | Phylloscopus    | collybita      | Pair          | Paleartic | Migration   |         | 6 (104)       |
| Sylviidae   | Acrocephalinae  | Phylloscopus    | lorenzii       | Pair          | Paleartic | Migration   |         | 4 (104)       |
| Sylviidae   | Acrocephalinae  | Phylloscopus    | neglectus      | Unknown       | Paleartic | Partial     |         | 4 (8)         |
| Sylviidae   | Acrocephalinae  | Phylloscopus    | bonelli        | Occasional    | Paleartic | Migration   |         | 5 (104)       |
| Sylviidae   | Acrocephalinae  | Phylloscopus    | sibilatrix     | Pair          | Paleartic | Migration   |         | 6 (104)       |
| Sylviidae   | Acrocephalinae  | Phylloscopus    | fuscatus       | Pair          | Paleartic | Migration   |         | (160)         |
| Sylviidae   | Acrocephalinae  | Phylloscopus    | fulgiventor    | Unknown       | Paleartic | Migration   |         | (8)           |
| Sylviidae   | Acrocephalinae  | Phylloscopus    | affinis        | Pair          | Paleartic | Migration   |         | 4 (8)         |
| Sylviidae   | Acrocephalinae  | Phylloscopus    | subaffinis     | Pair          | Paleartic | Altitudinal |         | (320)         |
| Sylviidae   | Acrocephalinae  | Phylloscopus    | griseolus      | Pair          | Paleartic | Migration   |         | 4 (320)       |
| Sylviidae   | Acrocephalinae  | Phylloscopus    | armandii       | Unknown       | Paleartic | Migration   |         | (320)         |
| Sylviidae   | Acrocephalinae  | Phylloscopus    | schwarzi       | Unknown       | Paleartic | Migration   |         | (320)         |
| Sylviidae   | Acrocephalinae  | Phylloscopus    | pulcher        | Pair          | Paleartic | Altitudinal |         | 4 (399)       |
| Sylviidae   | Acrocephalinae  | Phylloscopus    | maculipennis   | Unknown       | Paleartic | Altitudinal |         | (8)           |
| Sylviidae   | Acrocephalinae  | Phylloscopus    | proregulus     | Pair          | Paleartic | Migration   |         | 4 (399)       |
| Sylviidae   | Acrocephalinae  | Phylloscopus    | chloronotus    | Unknown       | Paleartic | Migration   |         | no source     |
| Sylviidae   | Acrocephalinae  | Phylloscopus    | subviridis     | Unknown       | Paleartic | Altitudinal |         | 4 (8)         |
| Sylviidae   | Acrocephalinae  | Phylloscopus    | inornatus      | Pair          | Paleartic | Migration   |         | 5 (104, 399)  |
| Sylviidae   | Acrocephalinae  | Phylloscopus    | borealis       | Pair          | Paleartic | Migration   |         | 6 (104)       |
| Sylviidae   | Acrocephalinae  | Phylloscopus    | trochiloides   | Pair          | Paleartic | Migration   |         | 5 (104, 399)  |
| Sylviidae   | Acrocephalinae  | Phylloscopus    | tenellipes     | Pair          | Paleartic | Migration   |         | 5 (52)        |
| Sylviidae   | Acrocephalinae  | Phylloscopus    | borealoides    | Pair          | Paleartic | Migration   |         | 5 (104)       |
| Sylviidae   | Acrocephalinae  | Phylloscopus    | magnirostris   | Pair          | Paleartic | Migration   |         | 4 (399)       |
| Sylviidae   | Acrocephalinae  | Phylloscopus    | tyleri         | Pair          | Paleartic | Migration   |         | 4 (399)       |
| Sylviidae   | Acrocephalinae  | Phylloscopus    | occipitalis    | Pair          | se Asia   | Migration   |         | 4 (399)       |
| Sylviidae   | Acrocephalinae  | Phylloscopus    | coronatus      | Pair          | Paleartic | Migration   |         | 4 (52)        |
| Sylviidae   | Acrocephalinae  | Phylloscopus    | ijimae         | Pair          | Paleartic | Migration   |         | 3 (92)        |
| Sylviidae   | Acrocephalinae  | Phylloscopus    | reguloides     | Unknown       | se Asia   | Altitudinal |         | 4 (320)       |
| Sylviidae   | Acrocephalinae  | Phylloscopus    | davisoni       | Pair          | se Asia   | Partial     |         | (399)         |
| Sylviidae   | Acrocephalinae  | Phylloscopus    | cantator       | Pair          | Paleartic | Migration   |         | 3 (8)         |
| Sylviidae   | Acrocephalinae  | Phylloscopus    | ricketti       | Unknown       | Paleartic | Partial     |         | (320)         |
| Sylviidae   | Acrocephalinae  | Phylloscopus    | olivaceus      | Unknown       | se Asia   | Resident    |         | (271)         |
| Sylviidae   | Acrocephalinae  | Phylloscopus    | cebuensis      | Unknown       | se Asia   | Resident    |         | (271)         |
| Sylviidae   | Acrocephalinae  | Phylloscopus    | trivirgatus    | Unknown       | se Asia   | Resident    |         | 2 (271)       |
| Sylviidae   | Acrocephalinae  | Phylloscopus    | sarasinorum    | Unknown       | se Asia   | Resident    |         | (88)          |
| Sylviidae   | Acrocephalinae  | Phylloscopus    | presbytes      | Unknown       | se Asia   | Resident    | Endemic | (88)          |
| Sylviidae   | Acrocephalinae  | Phylloscopus    | phliocephalus  | Unknown       | se Asia   | Resident    | Endemic | (88)          |
| Sylviidae   | Acrocephalinae  | Phylloscopus    | makirensis     | Unknown       | Australia | Resident    | Endemic | no source     |
| Sylviidae   | Acrocephalinae  | Phylloscopus    | amoenus        | Unknown       | Australia | Resident    | Endemic | (46)          |
| Sylviidae   | Acrocephalinae  | Seicercus       | burkii         | Pair          | se Asia   | Altitudinal |         | 4 (8)         |
| Sylviidae   | Acrocephalinae  | Seicercus       | xanthoschistos | Pair          | Paleartic | Altitudinal |         | 4 (8)         |
| Sylviidae   | Acrocephalinae  | Seicercus       | affinis        | Pair          | Paleartic | Altitudinal |         | 4 (8)         |
| Sylviidae   | Acrocephalinae  | Seicercus       | poliogenys     | Pair          | se Asia   | Altitudinal |         | 4 (8)         |
| Sylviidae   | Acrocephalinae  | Seicercus       | castaniceps    | Pair          | se Asia   | Altitudinal |         | 4 (8)         |
| Sylviidae   | Acrocephalinae  | Seicercus       | montis         | Unknown       | se Asia   | Resident    |         | 2 (271, 305)  |
| Sylviidae   | Acrocephalinae  | Seicercus       | grammiceps     | Unknown       | se Asia   | Resident    |         | (319)         |
| Sylviidae   | Acrocephalinae  | Tickellia       | hodgsoni       | Unknown       | se Asia   | Resident    |         | 3 (8)         |
| Sylviidae   | Acrocephalinae  | Abroscopus      | albugularis    | Pair          | Paleartic | Resident    |         | 4 (8)         |
| Sylviidae   | Acrocephalinae  | Abroscopus      | schisticeps    | Unknown       | Paleartic | Resident    |         | 5 (8)         |
| Sylviidae   | Acrocephalinae  | Abroscopus      | superciliaris  | Pair          | se Asia   | Altitudinal |         | 4 (8)         |
| Sylviidae   | Acrocephalinae  | Hyliota         | flavigaster    | Unknown       | Africa    | Resident    |         | 2 (496)       |
| Sylviidae   | Acrocephalinae  | Hyliota         | australis      | Unknown       | Africa    | Resident    |         | 3 (496)       |
| Sylviidae   | Acrocephalinae  | Hyliota         | violacea       | Unknown       | Africa    | Resident    |         | (496)         |
| Sylviidae   | Megalurinae     | Amphilais       | seebohmi       | Unknown       | Africa    | Resident    |         | 2 (284)       |
| Sylviidae   | Megalurinae     | Megalurus       | pryeri         | Pair          | Paleartic | Migration   |         | 5 (92)        |
| Sylviidae   | Megalurinae     | Megalurus       | timoriensis    | Pair          | Australia | Resident    |         | 3 (47)        |
| Sylviidae   | Megalurinae     | Megalurus       | palustris      | Unknown       | se Asia   | Resident    |         | 4 (8)         |
| Sylviidae   | Megalurinae     | Megalurus       | albolimbatus   | Unknown       | Australia | Resident    |         | 3 (87)        |
| Sylviidae   | Megalurinae     | Megalurus       | gramineus      | Pair          | Australia | Partial     |         | 4 (47)        |
| Sylviidae   | Megalurinae     | Megalurus       | punctatus      | Pair          | Australia | Resident    |         | 3 (422)       |
| Sylviidae   | Megalurinae     | Megalurus       | rufescens      | Unknown       | Australia | Resident    | Endemic | (422)         |
| Sylviidae   | Megalurinae     | Cincloramphus   | cruralis       | Uniparental   | Australia | Nomadic     |         | 3 MJL Magrath |
| (pers comm) |                 |                 |                |               |           |             |         |               |
| Sylviidae   | Megalurinae     | Cincloramphus   | mathewsi       | Pair          | Australia | Nomadic     |         | 3 MJL Magrath |
| (pers comm) |                 |                 |                |               |           |             |         |               |
| Sylviidae   | Megalurinae     | Eremiornis      | carteri        | Pair          | Australia | Resident    |         | 2 (47)        |
| Sylviidae   | Megalurinae     | Buettikoferella | bivittata      | Unknown       | Australia | Resident    | Endemic | (46)          |
| Sylviidae   | Megalurinae     | Megalurulus     | mariei         | Unknown       | Australia | Resident    | Endemic | (46)          |
| Sylviidae   | Megalurinae     | Megalurulus     | grosvenori     | Unknown       | Australia | Resident    |         | (53)          |
| Sylviidae   | Megalurinae     | Megalurulus     | llanae         | Unknown       | Australia | Resident    | Endemic | (46)          |
| Sylviidae   | Megalurinae     | Megalurulus     | whitneyi       | Unknown       | Australia | Resident    | Endemic | (87)          |
| Sylviidae   | Megalurinae     | Megalurulus     | rubiginosus    | Unknown       | Australia | Resident    |         | (87)          |
| Sylviidae   | Megalurinae     | Trichocichla    | rufa           | Unknown       | Australia | Resident    |         | (508)         |

| Family    | Clade Reference | Genus        | species         | Parental care | Region    | Movement    | Island | Clutch       |
|-----------|-----------------|--------------|-----------------|---------------|-----------|-------------|--------|--------------|
| Sylviidae | Megalurinae     | Chaetornis   | striatus        | Unknown       | se Asia   | Resident    |        | 4 (92)       |
| Sylviidae | Megalurinae     | Graminicola  | bengalensis     | Unknown       | se Asia   | Resident    |        | 4 (8)        |
| Sylviidae | Megalurinae     | Schoenicola  | brevirostris    | Pair          | Africa    | Partial     |        | 2 (496)      |
| Sylviidae | Megalurinae     | Schoenicola  | platyura        | Pair          | se Asia   | Resident    |        | (92)         |
| Sylviidae | Garrulacinae    | Garrulax     | cinereifrons    | Suspected     | se Asia   | Resident    |        | (31, 92)     |
| Sylviidae | Garrulacinae    | Garrulax     | palliatius      | Suspected     | se Asia   | Resident    |        | (446, 459)   |
| Sylviidae | Garrulacinae    | Garrulax     | rufifrons       | Unknown       | se Asia   | Resident    |        | (46)         |
| Sylviidae | Garrulacinae    | Garrulax     | perspicillatus  | Unknown       | Paleartic | Resident    |        | (145)        |
| Sylviidae | Garrulacinae    | Garrulax     | albugularis     | Suspected     | se Asia   | Resident    |        | 3 (7, 420)   |
| Sylviidae | Garrulacinae    | Garrulax     | leucolophus     | Suspected     | se Asia   | Resident    |        | 4 (536)      |
| Sylviidae | Garrulacinae    | Garrulax     | monileger       | Pair          | se Asia   | Resident    |        | 4 (7)        |
| Sylviidae | Garrulacinae    | Garrulax     | pectoralis      | Suspected     | se Asia   | Resident    |        | 4 (7)        |
| Sylviidae | Garrulacinae    | Garrulax     | lugubris        | Suspected     | se Asia   | Resident    |        | 2 (446, 459) |
| Sylviidae | Garrulacinae    | Garrulax     | calvus          | Unknown       | se Asia   | Resident    |        | (459)        |
| Sylviidae | Garrulacinae    | Garrulax     | striatus        | Pair          | se Asia   | Resident    |        | 2 (7)        |
| Sylviidae | Garrulacinae    | Garrulax     | strepitans      | Suspected     | se Asia   | Resident    |        | (318)        |
| Sylviidae | Garrulacinae    | Garrulax     | milleti         | Unknown       | se Asia   | Resident    |        | (46)         |
| Sylviidae | Garrulacinae    | Garrulax     | maesi           | Unknown       | se Asia   | Resident    |        | (425)        |
| Sylviidae | Garrulacinae    | Garrulax     | ruficollis      | Pair          | se Asia   | Resident    |        | 3 (7)        |
| Sylviidae | Garrulacinae    | Garrulax     | nuchalis        | Unknown       | se Asia   | Resident    |        | (46)         |
| Sylviidae | Garrulacinae    | Garrulax     | chinensis       | Unknown       | se Asia   | Resident    |        | 3 (7, 145)   |
| Sylviidae | Garrulacinae    | Garrulax     | vassali         | Unknown       | se Asia   | Resident    |        | (425)        |
| Sylviidae | Garrulacinae    | Garrulax     | galbanus        | Unknown       | se Asia   | Resident    |        | 3 (145)      |
| Sylviidae | Garrulacinae    | Garrulax     | delesserti      | Suspected     | se Asia   | Resident    |        | 3 (538)      |
| Sylviidae | Garrulacinae    | Garrulax     | gularis         | Unknown       | se Asia   | Resident    |        | 3 (7)        |
| Sylviidae | Garrulacinae    | Garrulax     | davidi          | Unknown       | se Asia   | Resident    |        | (145)        |
| Sylviidae | Garrulacinae    | Garrulax     | sukatschewi     | Unknown       | Paleartic | Resident    |        | (92)         |
| Sylviidae | Garrulacinae    | Garrulax     | cineraceus      | Pair          | se Asia   | Resident    |        | 2 (7)        |
| Sylviidae | Garrulacinae    | Garrulax     | rufogularis     | Pair          | se Asia   | Resident    |        | 3 (7)        |
| Sylviidae | Garrulacinae    | Garrulax     | lunulatus       | Unknown       | Paleartic | Resident    |        | (145)        |
| Sylviidae | Garrulacinae    | Garrulax     | bieti           | Unknown       | Paleartic | Resident    |        | (92)         |
| Sylviidae | Garrulacinae    | Garrulax     | maximus         | Unknown       | se Asia   | Resident    |        | (145)        |
| Sylviidae | Garrulacinae    | Garrulax     | ocellatus       | Unknown       | se Asia   | Resident    |        | 2 (145)      |
| Sylviidae | Garrulacinae    | Garrulax     | caerulatus      | Unknown       | se Asia   | Resident    |        | 3 (7)        |
| Sylviidae | Garrulacinae    | Garrulax     | poecilorhynchus | Unknown       | se Asia   | Resident    |        | (320)        |
| Sylviidae | Garrulacinae    | Garrulax     | mitratus        | Pair          | se Asia   | Resident    |        | (446, 459)   |
| Sylviidae | Garrulacinae    | Garrulax     | merulinus       | Unknown       | se Asia   | Resident    |        | 3 (7)        |
| Sylviidae | Garrulacinae    | Garrulax     | canorus         | Unknown       | se Asia   | Resident    |        | (320)        |
| Sylviidae | Garrulacinae    | Garrulax     | sannio          | Pair          | se Asia   | Resident    |        | 3 (7)        |
| Sylviidae | Garrulacinae    | Garrulax     | cachinnans      | Pair          | se Asia   | Resident    |        | 2 (253)      |
| Sylviidae | Garrulacinae    | Garrulax     | jerdoni         | Pair          | se Asia   | Resident    |        | 2 (252, 254) |
| Sylviidae | Garrulacinae    | Garrulax     | lineatus        | Pair          | se Asia   | Altitudinal |        | 2 (252, 420) |
| Sylviidae | Garrulacinae    | Garrulax     | virgatus        | Unknown       | se Asia   | Resident    |        | 2 (7)        |
| Sylviidae | Garrulacinae    | Garrulax     | austeni         | Unknown       | se Asia   | Resident    |        | 3 (7)        |
| Sylviidae | Garrulacinae    | Garrulax     | squamatus       | Unknown       | se Asia   | Resident    |        | 3 (7)        |
| Sylviidae | Garrulacinae    | Garrulax     | subunicolor     | Unknown       | se Asia   | Resident    |        | 3 (7)        |
| Sylviidae | Garrulacinae    | Garrulax     | elliottii       | Unknown       | Paleartic | Resident    |        | (320)        |
| Sylviidae | Garrulacinae    | Garrulax     | variegatus      | Pair          | se Asia   | Altitudinal |        | 3 (7)        |
| Sylviidae | Garrulacinae    | Garrulax     | henrici         | Pair          | se Asia   | Resident    |        | 2 (7)        |
| Sylviidae | Garrulacinae    | Garrulax     | affinis         | Pair          | se Asia   | Resident    |        | 2 (7)        |
| Sylviidae | Garrulacinae    | Garrulax     | morrisonianus   | Unknown       | Paleartic | Resident    |        | (145)        |
| Sylviidae | Garrulacinae    | Garrulax     | erythrocephalus | Pair          | se Asia   | Resident    |        | 2 (7)        |
| Sylviidae | Garrulacinae    | Garrulax     | yersini         | Unknown       | se Asia   | Resident    |        | (92)         |
| Sylviidae | Garrulacinae    | Garrulax     | formosus        | Unknown       | se Asia   | Resident    |        | (425)        |
| Sylviidae | Garrulacinae    | Garrulax     | milnei          | Suspected     | Paleartic | Resident    |        | (211)        |
| Sylviidae | Garrulacinae    | Liocichla    | phoenicea       | Pair          | se Asia   | Resident    |        | 2 (7)        |
| Sylviidae | Garrulacinae    | Liocichla    | omeiensis       | Unknown       | Paleartic | Altitudinal |        | (92)         |
| Sylviidae | Garrulacinae    | Liocichla    | steerii         | Unknown       | Paleartic | Resident    |        | (320)        |
| Sylviidae | Timaliini       | Modulatrix   | stictigula      | Unknown       | Africa    | Resident    |        | 2 (269)      |
| Sylviidae | Timaliini       | Arcanator    | orostruthus     | Unknown       | Africa    | Resident    |        | (269)        |
| Sylviidae | Timaliini       | Trichastoma  | rostratum       | Unknown       | se Asia   | Resident    |        | 2 (46)       |
| Sylviidae | Timaliini       | Trichastoma  | celebense       | Unknown       | se Asia   | Resident    |        | (88)         |
| Sylviidae | Timaliini       | Trichastoma  | bicolor         | Unknown       | se Asia   | Resident    |        | (459)        |
| Sylviidae | Timaliini       | Trichastoma  | woodi           | Unknown       | se Asia   | Resident    |        | (271)        |
| Sylviidae | Timaliini       | Malacocincla | abbotti         | Pair          | se Asia   | Resident    |        | 4 (5)        |
| Sylviidae | Timaliini       | Malacocincla | sepiarium       | Unknown       | se Asia   | Resident    |        | 2 (305, 459) |
| Sylviidae | Timaliini       | Malacocincla | vanderbilti     | Unknown       | se Asia   | Resident    |        | no source    |
| Sylviidae | Timaliini       | Malacocincla | perspicillata   | Unknown       | se Asia   | Resident    |        | (92)         |
| Sylviidae | Timaliini       | Malacocincla | malaccensis     | Unknown       | se Asia   | Resident    |        | 3 (305, 459) |
| Sylviidae | Timaliini       | Malacocincla | cinereiceps     | Unknown       | se Asia   | Resident    |        | (271)        |
| Sylviidae | Timaliini       | Pellorneum   | tickelli        | Pair          | se Asia   | Resident    |        | 3 (5)        |
| Sylviidae | Timaliini       | Pellorneum   | pyrrogenys      | Unknown       | se Asia   | Resident    |        | 2 (459)      |
| Sylviidae | Timaliini       | Pellorneum   | albiventre      | Pair          | se Asia   | Resident    |        | 4 (5)        |



| Family    | Clade Reference | Genus         | species       | Parental care | Region      | Movement    | Island | Clutch     |
|-----------|-----------------|---------------|---------------|---------------|-------------|-------------|--------|------------|
| Sylviidae | Timaliini       | Pellorneum    | palustre      | Unknown       | se Asia     | Resident    |        | (92)       |
| Sylviidae | Timaliini       | Pellorneum    | ruficeps      | Unknown       | se Asia     | Resident    | 3      | (5)        |
| Sylviidae | Timaliini       | Pellorneum    | fuscocapillum | Pair          | se Asia     | Resident    | 2      | (5)        |
| Sylviidae | Timaliini       | Pellorneum    | capistratum   | Unknown       | se Asia     | Resident    | 2      | (305, 459) |
| Sylviidae | Timaliini       | Malacopteron  | magnirostre   | Unknown       | se Asia     | Resident    |        | (459)      |
| Sylviidae | Timaliini       | Malacopteron  | affine        | Unknown       | se Asia     | Resident    | 2      | (305, 459) |
| Sylviidae | Timaliini       | Malacopteron  | cinereum      | Unknown       | se Asia     | Resident    |        | (459)      |
| Sylviidae | Timaliini       | Malacopteron  | magnum        | Unknown       | se Asia     | Resident    |        | (459)      |
| Sylviidae | Timaliini       | Malacopteron  | palawanense   | Unknown       | se Asia     | Resident    |        | (271)      |
| Sylviidae | Timaliini       | Malacopteron  | albogulare    | Unknown       | se Asia     | Resident    |        | (459)      |
| Sylviidae | Timaliini       | Illadopsis    | cleaveri      | Pair          | Africa      | Resident    | 2      | (174)      |
| Sylviidae | Timaliini       | Illadopsis    | albipectus    | Unknown       | Africa      | Resident    | 2      | (174)      |
| Sylviidae | Timaliini       | Illadopsis    | rufescens     | Unknown       | Africa      | Resident    |        | (174)      |
| Sylviidae | Timaliini       | Illadopsis    | puveli        | Unknown       | Africa      | Resident    |        | (174)      |
| Sylviidae | Timaliini       | Illadopsis    | rufipennis    | Cooperation   | Africa      | Resident    | 2      | (174)      |
| Sylviidae | Timaliini       | Illadopsis    | fulvescens    | Unknown       | Africa      | Resident    | 2      | (174)      |
| Sylviidae | Timaliini       | Illadopsis    | pyrrhoptera   | Unknown       | Africa      | Resident    | 2      | (174)      |
| Sylviidae | Timaliini       | Illadopsis    | atriceps      | Unknown       | Africa      | Resident    |        | (174)      |
| Sylviidae | Timaliini       | Illadopsis    | abyssinica    | Pair          | Africa      | Resident    | 2      | (174)      |
| Sylviidae | Timaliini       | Kakamega      | poliothorax   | Unknown       | Africa      | Resident    |        | (174)      |
| Sylviidae | Timaliini       | Ptyrticus     | turdinus      | Unknown       | Africa      | Resident    |        | (174)      |
| Sylviidae | Timaliini       | Pomatorhinus  | hypoleucos    | Unknown       | se Asia     | Resident    | 2      | (5)        |
| Sylviidae | Timaliini       | Pomatorhinus  | erythrocnemis | Unknown       | se Asia     | Resident    |        | (5)        |
| Sylviidae | Timaliini       | Pomatorhinus  | erythrognys   | Pair          | se Asia     | Resident    | 3      | (5)        |
| Sylviidae | Timaliini       | Pomatorhinus  | horsfieldii   | Unknown       | se Asia     | Resident    |        | (5)        |
| Sylviidae | Timaliini       | Pomatorhinus  | schisticeps   | Pair          | se Asia     | Resident    | 4      | (5)        |
| Sylviidae | Timaliini       | Pomatorhinus  | montanus      | Unknown       | se Asia     | Resident    | 2      | (459)      |
| Sylviidae | Timaliini       | Pomatorhinus  | ruficollis    | Pair          | se Asia     | Resident    | 4      | (5)        |
| Sylviidae | Timaliini       | Pomatorhinus  | ochraceiceps  | Unknown       | se Asia     | Resident    | 4      | (5)        |
| Sylviidae | Timaliini       | Pomatorhinus  | ferruginosus  | Unknown       | se Asia     | Resident    | 4      | (5)        |
| Sylviidae | Timaliini       | Xiphirhynchus | superciliaris | Unknown       | se Asia     | Altitudinal | 4      | (5)        |
| Sylviidae | Timaliini       | Jabouilleia   | danjoui       | Unknown       | se Asia     | Resident    |        | (46)       |
| Sylviidae | Timaliini       | Rimator       | malacoptilus  | Pair          | se Asia     | Resident    | 4      | (5)        |
| Sylviidae | Timaliini       | Ptilocichla   | leucogrammica | Unknown       | se Asia     | Resident    |        | (459)      |
| Sylviidae | Timaliini       | Ptilocichla   | mindanensis   | Unknown       | se Asia     | Resident    | 1      | (271)      |
| Sylviidae | Timaliini       | Ptilocichla   | falcata       | Unknown       | se Asia     | Resident    |        | (271)      |
| Sylviidae | Timaliini       | Kenopia       | striata       | Unknown       | se Asia     | Resident    |        | (446)      |
| Sylviidae | Timaliini       | Napothera     | macroductyla  | Unknown       | se Asia     | Resident    | 2      | (46)       |
| Sylviidae | Timaliini       | Napothera     | rufpectus     | Unknown       | se Asia     | Resident    |        | (319)      |
| Sylviidae | Timaliini       | Napothera     | atrigularis   | Unknown       | se Asia     | Resident    |        | (305, 459) |
| Sylviidae | Timaliini       | Napothera     | marmorata     | Unknown       | se Asia     | Resident    |        | (305)      |
| Sylviidae | Timaliini       | Napothera     | crispifrons   | Unknown       | se Asia     | Resident    |        | (425)      |
| Sylviidae | Timaliini       | Napothera     | brevicaudata  | Pair          | se Asia     | Resident    | 3      | (5)        |
| Sylviidae | Timaliini       | Napothera     | crassa        | Unknown       | se Asia     | Resident    |        | (459)      |
| Sylviidae | Timaliini       | Napothera     | rabori        | Unknown       | se Asia     | Resident    |        | (271)      |
| Sylviidae | Timaliini       | Napothera     | epilepidota   | Pair          | se Asia     | Resident    | 4      | (5)        |
| Sylviidae | Timaliini       | Pnoepyga      | albiventer    | Pair          | se Asia     | Resident    | 4      | (5)        |
| Sylviidae | Timaliini       | Pnoepyga      | immaculata    | Unknown       | se Asia     | Unknown     |        | (5)        |
| Sylviidae | Timaliini       | Pnoepyga      | pusilla       | Unknown       | se Asia     | Altitudinal | 4      | (5)        |
| Sylviidae | Timaliini       | Spelaeornis   | caudatus      | Unknown       | se Asia     | Resident    | 3      | (5)        |
| Sylviidae | Timaliini       | Spelaeornis   | badeigularis  | Unknown       | Palaearctic | Resident    |        | (92)       |
| Sylviidae | Timaliini       | Spelaeornis   | trogodytoides | Unknown       | Palaearctic | Resident    |        | (5)        |
| Sylviidae | Timaliini       | Spelaeornis   | formosus      | Unknown       | Palaearctic | Resident    |        | (5)        |
| Sylviidae | Timaliini       | Spelaeornis   | chocolatinus  | Pair          | se Asia     | Resident    | 3      | (5)        |
| Sylviidae | Timaliini       | Spelaeornis   | longicaudatus | Pair          | se Asia     | Resident    | 3      | (92)       |
| Sylviidae | Timaliini       | Sphenocichla  | humei         | Unknown       | se Asia     | Altitudinal | 4      | (5)        |
| Sylviidae | Timaliini       | Neomixis      | tenella       | Unknown       | Africa      | Resident    | 2      | (284)      |
| Sylviidae | Timaliini       | Neomixis      | viridis       | Unknown       | Africa      | Resident    |        | (284)      |
| Sylviidae | Timaliini       | Neomixis      | striatigula   | Unknown       | Africa      | Resident    | 4      | (284)      |
| Sylviidae | Timaliini       | Neomixis      | flavoviridis  | Unknown       | Africa      | Resident    | 2      | (284)      |
| Sylviidae | Timaliini       | Stachyris     | rodolphei     | Unknown       | se Asia     | Resident    |        | no source  |
| Sylviidae | Timaliini       | Stachyris     | ambigua       | Unknown       | se Asia     | Resident    |        | (320)      |
| Sylviidae | Timaliini       | Stachyris     | ruffrons      | Pair          | se Asia     | Resident    | 4      | (5)        |
| Sylviidae | Timaliini       | Stachyris     | ruficeps      | Pair          | Palaearctic | Resident    | 4      | (5)        |
| Sylviidae | Timaliini       | Stachyris     | pyrrhops      | Pair          | Palaearctic | Resident    | 4      | (5, 420)   |
| Sylviidae | Timaliini       | Stachyris     | chrysaesa     | Unknown       | Palaearctic | Resident    | 4      | (5)        |
| Sylviidae | Timaliini       | Stachyris     | plateni       | Unknown       | se Asia     | Resident    |        | (271)      |
| Sylviidae | Timaliini       | Stachyris     | dennistouni   | Unknown       | se Asia     | Resident    |        | (271)      |
| Sylviidae | Timaliini       | Stachyris     | nigrocapitata | Unknown       | se Asia     | Resident    |        | (271)      |
| Sylviidae | Timaliini       | Stachyris     | capitalis     | Unknown       | se Asia     | Resident    |        | (271)      |
| Sylviidae | Timaliini       | Stachyris     | speciosa      | Pair          | se Asia     | Resident    |        | (92)       |
| Sylviidae | Timaliini       | Stachyris     | whiteheadi    | Unknown       | se Asia     | Resident    |        | (271)      |
| Sylviidae | Timaliini       | Stachyris     | striata       | Unknown       | se Asia     | Resident    |        | (271)      |

| Family    | Clade Reference | Genus          | species       | Parental care | Region    | Movement    | Island | Clutch          |
|-----------|-----------------|----------------|---------------|---------------|-----------|-------------|--------|-----------------|
| Sylviidae | Timaliini       | Stachyris      | latistriata   | Unknown       | se Asia   | Resident    |        | (271)           |
| Sylviidae | Timaliini       | Stachyris      | nigrorum      | Unknown       | se Asia   | Resident    |        | (271)           |
| Sylviidae | Timaliini       | Stachyris      | hypogrammica  | Unknown       | se Asia   | Resident    |        | (92)            |
| Sylviidae | Timaliini       | Stachyris      | grammiceps    | Unknown       | se Asia   | Resident    |        | (46)            |
| Sylviidae | Timaliini       | Stachyris      | herberti      | Unknown       | se Asia   | Resident    |        | (133)           |
| Sylviidae | Timaliini       | Stachyris      | nigriceps     | Pair          | Paleartic | Resident    | 4      | (5, 459)        |
| Sylviidae | Timaliini       | Stachyris      | poliocephala  | Unknown       | se Asia   | Resident    |        | (459)           |
| Sylviidae | Timaliini       | Stachyris      | oglei         | Unknown       | Paleartic | Altitudinal | 4      | (92)            |
| Sylviidae | Timaliini       | Stachyris      | striolata     | Unknown       | se Asia   | Resident    |        | (305)           |
| Sylviidae | Timaliini       | Stachyris      | leucotis      | Unknown       | se Asia   | Resident    |        | (459)           |
| Sylviidae | Timaliini       | Stachyris      | nigricollis   | Unknown       | se Asia   | Resident    | 2      | (305, 459)      |
| Sylviidae | Timaliini       | Stachyris      | thoracica     | Unknown       | se Asia   | Resident    |        | (319)           |
| Sylviidae | Timaliini       | Stachyris      | maculata      | Unknown       | se Asia   | Resident    | 3      | (305, 459)      |
| Sylviidae | Timaliini       | Stachyris      | erythroptera  | Suspected     | se Asia   | Resident    | 3      | (446, 459)      |
| Sylviidae | Timaliini       | Stachyris      | melanothorax  | Unknown       | se Asia   | Resident    |        | (319)           |
| Sylviidae | Timaliini       | Dumetia        | hyperythra    | Unknown       | se Asia   | Resident    | 3      | (5)             |
| Sylviidae | Timaliini       | Rhopocichla    | atriceps      | Suspected     | se Asia   | Resident    | 2      | (5)             |
| Sylviidae | Timaliini       | Macronous      | gularis       | Suspected     | se Asia   | Resident    | 3      | (130, 210, 271) |
| Sylviidae | Timaliini       | Macronous      | flavicollis   | Unknown       | se Asia   | Resident    |        | (319)           |
| Sylviidae | Timaliini       | Macronous      | kellei        | Unknown       | se Asia   | Resident    |        | (425)           |
| Sylviidae | Timaliini       | Macronous      | striaticeps   | Unknown       | se Asia   | Resident    | 3      | (271)           |
| Sylviidae | Timaliini       | Macronous      | ptilosus      | Unknown       | se Asia   | Resident    | 3      | (459)           |
| Sylviidae | Timaliini       | Micromacronus  | leytensis     | Unknown       | se Asia   | Resident    |        | (271)           |
| Sylviidae | Timaliini       | Timalia        | pileata       | Pair          | se Asia   | Resident    | 4      | (5)             |
| Sylviidae | Timaliini       | Chrysomma      | sinense       | Cooperation   | se Asia   | Resident    | 4      | (182)           |
| Sylviidae | Timaliini       | Chrysomma      | altirostre    | Pair          | se Asia   | Resident    |        | (92)            |
| Sylviidae | Timaliini       | Chrysomma      | poecilotis    | Unknown       | Paleartic | Resident    |        | (320)           |
| Sylviidae | Timaliini       | Turdoides      | nipalensis    | Unknown       | Paleartic | Resident    |        | (5)             |
| Sylviidae | Timaliini       | Turdoides      | altirostris   | Cooperation   | Paleartic | Resident    | 4      | (105)           |
| Sylviidae | Timaliini       | Turdoides      | caudatus      | Cooperation   | se Asia   | Resident    | 3      | (181)           |
| Sylviidae | Timaliini       | Turdoides      | earlei        | Cooperation   | se Asia   | Resident    | 3      | (5)             |
| Sylviidae | Timaliini       | Turdoides      | gularis       | Unknown       | se Asia   | Resident    | 4      | (425)           |
| Sylviidae | Timaliini       | Turdoides      | longirostris  | Unknown       | se Asia   | Resident    | 4      | (92)            |
| Sylviidae | Timaliini       | Turdoides      | malcolmi      | Cooperation   | se Asia   | Resident    | 4      | (5)             |
| Sylviidae | Timaliini       | Turdoides      | squamiceps    | Cooperation   | Paleartic | Resident    | 4      | (539)           |
| Sylviidae | Timaliini       | Turdoides      | fulvus        | Cooperation   | Africa    | Resident    | 4      | (105)           |
| Sylviidae | Timaliini       | Turdoides      | aylmeri       | Cooperation   | Africa    | Resident    | 2      | (174)           |
| Sylviidae | Timaliini       | Turdoides      | rubiginosus   | Cooperation   | Africa    | Resident    | 2      | (243)           |
| Sylviidae | Timaliini       | Turdoides      | subrufus      | Unknown       | se Asia   | Resident    | 4      | (5)             |
| Sylviidae | Timaliini       | Turdoides      | striatus      | Cooperation   | se Asia   | Resident    | 4      | (180)           |
| Sylviidae | Timaliini       | Turdoides      | rufescens     | Suspected     | se Asia   | Resident    | 2      | (5)             |
| Sylviidae | Timaliini       | Turdoides      | affinis       | Cooperation   | se Asia   | Resident    | 3      | (5)             |
| Sylviidae | Timaliini       | Turdoides      | reinwardtii   | Cooperation   | Africa    | Resident    | 2      | (174)           |
| Sylviidae | Timaliini       | Turdoides      | tenebrosus    | Cooperation   | Africa    | Resident    | 3      | (174)           |
| Sylviidae | Timaliini       | Turdoides      | melanops      | Cooperation   | Africa    | Resident    | 3      | (174)           |
| Sylviidae | Timaliini       | Turdoides      | squamulatus   | Suspected     | Africa    | Resident    |        | (174)           |
| Sylviidae | Timaliini       | Turdoides      | leucopygius   | Suspected     | Africa    | Resident    | 3      | (174)           |
| Sylviidae | Timaliini       | Turdoides      | hartlaubii    | Cooperation   | Africa    | Resident    | 3      | (174)           |
| Sylviidae | Timaliini       | Turdoides      | bicolor       | Cooperation   | Africa    | Resident    | 3      | (174)           |
| Sylviidae | Timaliini       | Turdoides      | sharpei       | Cooperation   | Africa    | Resident    | 3      | (174)           |
| Sylviidae | Timaliini       | Turdoides      | hypoleucus    | Cooperation   | Africa    | Resident    | 3      | (174)           |
| Sylviidae | Timaliini       | Turdoides      | hindei        | Cooperation   | Africa    | Resident    | 2      | (174)           |
| Sylviidae | Timaliini       | Turdoides      | plebejus      | Suspected     | Africa    | Resident    |        | (174)           |
| Sylviidae | Timaliini       | Turdoides      | leucocephalus | Cooperation   | Africa    | Resident    | 3      | (174)           |
| Sylviidae | Timaliini       | Turdoides      | jardineii     | Cooperation   | Africa    | Resident    | 3      | (174)           |
| Sylviidae | Timaliini       | Turdoides      | gymnogenys    | Cooperation   | Africa    | Resident    | 2      | (174)           |
| Sylviidae | Timaliini       | Babax          | lanceolatus   | Unknown       | Paleartic | Resident    | 3      | (5)             |
| Sylviidae | Timaliini       | Babax          | waddelli      | Unknown       | Paleartic | Resident    | 3      | (5)             |
| Sylviidae | Timaliini       | Babax          | koslowi       | Unknown       | se Asia   | Resident    |        | (46)            |
| Sylviidae | Timaliini       | Leiothrix      | argentaureis  | Pair          | se Asia   | Resident    | 4      | (7)             |
| Sylviidae | Timaliini       | Leiothrix      | lutea         | Pair          | se Asia   | Resident    | 4      | (329)           |
| Sylviidae | Timaliini       | Cutia          | nipalensis    | Unknown       | Paleartic | Resident    |        | (7)             |
| Sylviidae | Timaliini       | Pteruthius     | rufiventer    | Unknown       | Paleartic | Resident    |        | (7)             |
| Sylviidae | Timaliini       | Pteruthius     | flaviscapitis | Pair          | Paleartic | Resident    | 3      | (7)             |
| Sylviidae | Timaliini       | Pteruthius     | xanthochlorus | Unknown       | Paleartic | Resident    | 3      | (7)             |
| Sylviidae | Timaliini       | Pteruthius     | melanotis     | Pair          | se Asia   | Altitudinal | 4      | (7)             |
| Sylviidae | Timaliini       | Pteruthius     | aenobarbus    | Unknown       | Paleartic | Resident    |        | (7)             |
| Sylviidae | Timaliini       | Gampsorhynchus | rufulus       | Unknown       | Paleartic | Resident    | 3      | (7)             |
| Sylviidae | Timaliini       | Actinodura     | egertoni      | Pair          | se Asia   | Resident    | 3      | (7)             |
| Sylviidae | Timaliini       | Actinodura     | ramsayi       | Unknown       | se Asia   | Resident    |        | (425)           |
| Sylviidae | Timaliini       | Actinodura     | nipalensis    | Unknown       | se Asia   | Resident    | 2      | (7)             |
| Sylviidae | Timaliini       | Actinodura     | waldeni       | Unknown       | se Asia   | Resident    |        | (7)             |

| Family    | Clade Reference | Genus        | species           | Parental care | Region     | Movement    | Island | Clutch     |
|-----------|-----------------|--------------|-------------------|---------------|------------|-------------|--------|------------|
| Sylviidae | Timaliini       | Actinodura   | souliei           | Unknown       | se Asia    | Resident    |        | (425)      |
| Sylviidae | Timaliini       | Actinodura   | morrisoniana      | Unknown       | Palearctic | Resident    |        | (320)      |
| Sylviidae | Timaliini       | Minla        | cyanouroptera     | Unknown       | se Asia    | Resident    | 3      | (7)        |
| Sylviidae | Timaliini       | Minla        | strigula          | Unknown       | se Asia    | Resident    | 3      | (7)        |
| Sylviidae | Timaliini       | Minla        | ignotincta        | Unknown       | se Asia    | Resident    | 3      | (7)        |
| Sylviidae | Timaliini       | Alcippe      | chrysotis         | Unknown       | se Asia    | Resident    | 3      | (320)      |
| Sylviidae | Timaliini       | Alcippe      | variegaticeps     | Pair          | se Asia    | Resident    | 4      | (92)       |
| Sylviidae | Timaliini       | Alcippe      | cinerea           | Unknown       | se Asia    | Resident    | 4      | (7)        |
| Sylviidae | Timaliini       | Alcippe      | castaneiceps      | Pair          | se Asia    | Resident    | 4      | (7)        |
| Sylviidae | Timaliini       | Alcippe      | vinipectus        | Unknown       | Palearctic | Resident    | 3      | (7)        |
| Sylviidae | Timaliini       | Alcippe      | striaticollis     | Unknown       | Palearctic | Resident    | 4      | (7)        |
| Sylviidae | Timaliini       | Alcippe      | ruficapilla       | Unknown       | Palearctic | Resident    |        | (320)      |
| Sylviidae | Timaliini       | Alcippe      | cinereiceps       | Unknown       | Palearctic | Resident    |        | (320)      |
| Sylviidae | Timaliini       | Alcippe      | ludlowi           | Unknown       | Palearctic | Resident    |        | (320)      |
| Sylviidae | Timaliini       | Alcippe      | rufogularis       | Pair          | Palearctic | Resident    | 3      | (7)        |
| Sylviidae | Timaliini       | Alcippe      | brunnea           | Pair          | Palearctic | Resident    | 3      | (7)        |
| Sylviidae | Timaliini       | Alcippe      | dubia             | Unknown       | se Asia    | Resident    | 3      | (425)      |
| Sylviidae | Timaliini       | Alcippe      | brunneicauda      | Unknown       | se Asia    | Resident    |        | (459)      |
| Sylviidae | Timaliini       | Alcippe      | poioicephala      | Suspected     | se Asia    | Resident    | 2      | (282)      |
| Sylviidae | Timaliini       | Alcippe      | pyrrhoptera       | Unknown       | se Asia    | Resident    |        | (319)      |
| Sylviidae | Timaliini       | Alcippe      | peracensis        | Unknown       | se Asia    | Resident    | 2      | (305)      |
| Sylviidae | Timaliini       | Alcippe      | morrisonia        | Unknown       | se Asia    | Resident    |        | (320)      |
| Sylviidae | Timaliini       | Alcippe      | nipalensis        | Pair          | se Asia    | Resident    | 2      | (7)        |
| Sylviidae | Timaliini       | Lioptilus    | nigricapillus     | Pair          | Africa     | Partial     | 2      | (174)      |
| Sylviidae | Timaliini       | Kupeornis    | gilberti          | Unknown       | Africa     | Resident    |        | (174)      |
| Sylviidae | Timaliini       | Kupeornis    | rufocinctus       | Unknown       | Africa     | Resident    |        | (174)      |
| Sylviidae | Timaliini       | Kupeornis    | chapini           | Unknown       | Africa     | Resident    |        | (174)      |
| Sylviidae | Timaliini       | Parophasma   | galinieri         | Unknown       | Africa     | Resident    |        | (174)      |
| Sylviidae | Timaliini       | Phyllanthus  | atripennis        | Suspected     | Africa     | Resident    |        | (174)      |
| Sylviidae | Timaliini       | Crocias      | langbianis        | Unknown       | se Asia    | Resident    |        | (92)       |
| Sylviidae | Timaliini       | Crocias      | albonotatus       | Unknown       | se Asia    | Resident    |        | (46)       |
| Sylviidae | Timaliini       | Heterophasia | annectens         | Unknown       | se Asia    | Resident    | 3      | (7)        |
| Sylviidae | Timaliini       | Heterophasia | capistrata        | Pair          | Palearctic | Resident    | 3      | (420)      |
| Sylviidae | Timaliini       | Heterophasia | gracilis          | Pair          | Palearctic | Resident    | 3      | (7)        |
| Sylviidae | Timaliini       | Heterophasia | melanoleuca       | Unknown       | se Asia    | Resident    | 2      | (425)      |
| Sylviidae | Timaliini       | Heterophasia | auricularis       | Unknown       | Palearctic | Resident    |        | (320)      |
| Sylviidae | Timaliini       | Heterophasia | pulchella         | Unknown       | Palearctic | Resident    |        | (7)        |
| Sylviidae | Timaliini       | Heterophasia | picaoides         | Unknown       | Palearctic | Resident    |        | (7)        |
| Sylviidae | Timaliini       | Yuhina       | castaniceps       | Unknown       | se Asia    | Resident    | 3      | (7)        |
| Sylviidae | Timaliini       | Yuhina       | everetti          | Cooperation   | se Asia    | Resident    | 3      | (282, 459) |
| Sylviidae | Timaliini       | Yuhina       | bakeri            | Pair          | se Asia    | Resident    | 4      | (7)        |
| Sylviidae | Timaliini       | Yuhina       | flavicollis       | Pair          | se Asia    | Resident    | 3      | (7)        |
| Sylviidae | Timaliini       | Yuhina       | humilis           | Unknown       | se Asia    | Resident    |        | (425)      |
| Sylviidae | Timaliini       | Yuhina       | gularis           | Unknown       | Palearctic | Altitudinal | 4      | (7)        |
| Sylviidae | Timaliini       | Yuhina       | diademata         | Unknown       | se Asia    | Resident    | 2      | (425)      |
| Sylviidae | Timaliini       | Yuhina       | occipitalis       | Unknown       | se Asia    | Altitudinal | 4      | (7)        |
| Sylviidae | Timaliini       | Yuhina       | brunneiceps       | Cooperation   | Palearctic | Resident    |        | (537)      |
| Sylviidae | Timaliini       | Yuhina       | nigrimenta        | Unknown       | se Asia    | Resident    | 4      | (7)        |
| Sylviidae | Timaliini       | Yuhina       | zantholeuca       | Suspected     | se Asia    | Resident    | 2      | (282)      |
| Sylviidae | Timaliini       | Myzornis     | pyrrhoura         | Unknown       | se Asia    | Resident    |        | (7)        |
| Sylviidae | Timaliini       | Oxylabes     | madagascariensis  | Unknown       | Africa     | Resident    | 2      | (284)      |
| Sylviidae | Timaliini       | Crossleyia   | xanthophrys       | Unknown       | Africa     | Resident    | 3      | (284)      |
| Sylviidae | Timaliini       | Mystacornis  | crossleyi         | Pair          | Africa     | Resident    | 3      | (284)      |
| Sylviidae | Timaliini       | Panurus      | biarmicus         | Pair          | Palearctic | Partial     | 6      | (105)      |
| Sylviidae | Timaliini       | Conostoma    | oemodium          | Unknown       | Palearctic | Resident    | 2      | (5)        |
| Sylviidae | Timaliini       | Paradoxornis | paradoxus         | Unknown       | Palearctic | Resident    |        | (320)      |
| Sylviidae | Timaliini       | Paradoxornis | unicolor          | Unknown       | Palearctic | Resident    |        | (5)        |
| Sylviidae | Timaliini       | Paradoxornis | gularis           | Unknown       | Palearctic | Resident    |        | (5)        |
| Sylviidae | Timaliini       | Paradoxornis | flavirostris      | Unknown       | Palearctic | Resident    | 3      | (92)       |
| Sylviidae | Timaliini       | Paradoxornis | guttaticollis     | Unknown       | Palearctic | Resident    | 2      | (5)        |
| Sylviidae | Timaliini       | Paradoxornis | conspicillatus    | Unknown       | Palearctic | Resident    |        | (320)      |
| Sylviidae | Timaliini       | Paradoxornis | webbianus         | Pair          | Palearctic | Resident    |        | (273, 274) |
| Sylviidae | Timaliini       | Paradoxornis | brunneus          | Unknown       | se Asia    | Resident    | 3      | (425)      |
| Sylviidae | Timaliini       | Paradoxornis | alphonsianus      | Unknown       | Palearctic | Resident    |        | (320)      |
| Sylviidae | Timaliini       | Paradoxornis | zappeyi           | Unknown       | Palearctic | Altitudinal |        | (92)       |
| Sylviidae | Timaliini       | Paradoxornis | przewalskii       | Unknown       | Palearctic | Resident    |        | (92)       |
| Sylviidae | Timaliini       | Paradoxornis | fulvifrons        | Unknown       | Palearctic | Resident    |        | (5)        |
| Sylviidae | Timaliini       | Paradoxornis | nipalensis        | Unknown       | Palearctic | Resident    | 3      | (5)        |
| Sylviidae | Timaliini       | Paradoxornis | verreauxi         | Unknown       | se Asia    | Resident    | 3      | (425)      |
| Sylviidae | Timaliini       | Paradoxornis | davidianus        | Unknown       | se Asia    | Resident    |        | (46)       |
| Sylviidae | Timaliini       | Paradoxornis | atrosuperciliaris | Unknown       | Palearctic | Resident    | 3      | (5)        |
| Sylviidae | Timaliini       | Paradoxornis | ruficeps          | Unknown       | Palearctic | Resident    | 2      | (5)        |
| Sylviidae | Timaliini       | Paradoxornis | heudei            | Pair          | Palearctic | Resident    |        | (316)      |

| Family       | Clade Reference | Genus      | species         | Parental care | Region    | Movement  | Island    | Clutch     |
|--------------|-----------------|------------|-----------------|---------------|-----------|-----------|-----------|------------|
| Sylviidae    | Timaliini       | Rhabdornis | mystacalis      | Unknown       | se Asia   | Resident  |           | (271)      |
| Sylviidae    | Timaliini       | Rhabdornis | grandis         | Unknown       | se Asia   | Resident  |           | (271)      |
| Sylviidae    | Timaliini       | Rhabdornis | inornatus       | Unknown       | se Asia   | Resident  |           | (271)      |
| Sylviidae    | Chamaeini       | Chamaea    | fasciata        | Pair          | Paleartic | Resident  | 4         | (185)      |
| Sylviidae    | Sylviini        | Sylvia     | buryi           | Pair          | Paleartic | Resident  | 3         | (448)      |
| Sylviidae    | Sylviini        | Sylvia     | lugens          | Pair          | Africa    | Resident  | 2         | (448)      |
| Sylviidae    | Sylviini        | Sylvia     | boehmi          | Pair          | Africa    | Resident  | 2         | (448)      |
| Sylviidae    | Sylviini        | Sylvia     | layardi         | Pair          | Africa    | Resident  | 3         | (448)      |
| Sylviidae    | Sylviini        | Sylvia     | subcaeruleum    | Pair          | Africa    | Resident  | 2         | (448)      |
| Sylviidae    | Sylviini        | Sylvia     | atricapilla     | Pair          | Paleartic | Migration | 4         | (448)      |
| Sylviidae    | Sylviini        | Sylvia     | borin           | Pair          | Paleartic | Migration | 4         | (448)      |
| Sylviidae    | Sylviini        | Sylvia     | communis        | Pair          | Paleartic | Migration | 5         | (448)      |
| Sylviidae    | Sylviini        | Sylvia     | curruca         | Pair          | Paleartic | Migration | 5         | (448)      |
| Sylviidae    | Sylviini        | Sylvia     | minula          | Pair          | Paleartic | Migration |           | (448)      |
| Sylviidae    | Sylviini        | Sylvia     | althaea         | Pair          | Paleartic | Migration | 4         | (448)      |
| Sylviidae    | Sylviini        | Sylvia     | nana            | Pair          | Paleartic | Migration | 5         | (448)      |
| Sylviidae    | Sylviini        | Sylvia     | nisoria         | Pair          | Paleartic | Migration | 5         | (448)      |
| Sylviidae    | Sylviini        | Sylvia     | hortensis       | Pair          | Paleartic | Migration | 5         | (448)      |
| Sylviidae    | Sylviini        | Sylvia     | leucomelaena    | Pair          | Paleartic | Resident  | 3         | (448)      |
| Sylviidae    | Sylviini        | Sylvia     | rueppelli       | Pair          | Paleartic | Migration | 4         | (448)      |
| Sylviidae    | Sylviini        | Sylvia     | melanocephala   | Pair          | Paleartic | Partial   | 4         | (448)      |
| Sylviidae    | Sylviini        | Sylvia     | melanothorax    | Pair          | Paleartic | Partial   | 4         | (448)      |
| Sylviidae    | Sylviini        | Sylvia     | cantillans      | Pair          | Paleartic | Migration | 4         | (448)      |
| Sylviidae    | Sylviini        | Sylvia     | mystacea        | Pair          | Paleartic | Migration | 4         | (448)      |
| Sylviidae    | Sylviini        | Sylvia     | conspicillata   | Pair          | Paleartic | Partial   | 4         | (448)      |
| Sylviidae    | Sylviini        | Sylvia     | deserticola     | Pair          | Paleartic | Partial   | 4         | (448)      |
| Sylviidae    | Sylviini        | Sylvia     | undata          | Cooperation   | Paleartic | Partial   | 4         | (448)      |
| Sylviidae    | Sylviini        | Sylvia     | sarda           | Pair          | Paleartic | Partial   | 4         | (448)      |
| Zosteropidae | Zosteropidae    | Speirops   | melanocephalus  | Unknown       | Africa    | Resident  |           | (174)      |
| Zosteropidae | Zosteropidae    | Speirops   | lugubris        | Unknown       | Africa    | Resident  | Endemic 2 | (174)      |
| Zosteropidae | Zosteropidae    | Speirops   | brunneus        | Unknown       | Africa    | Resident  | Endemic   | (174)      |
| Zosteropidae | Zosteropidae    | Speirops   | leucophoeus     | Unknown       | Africa    | Resident  | Endemic 2 | (174)      |
| Zosteropidae | Zosteropidae    | Zosterops  | senegalensis    | Pair          | Africa    | Resident  | 3         | (174)      |
| Zosteropidae | Zosteropidae    | Zosterops  | vaughani        | Unknown       | Africa    | Resident  | Endemic 2 | (174)      |
| Zosteropidae | Zosteropidae    | Zosterops  | mayottensis     | Unknown       | Africa    | Resident  | Endemic   | no source  |
| Zosteropidae | Zosteropidae    | Zosterops  | poliogaster     | Pair          | Africa    | Resident  | 2         | (174)      |
| Zosteropidae | Zosteropidae    | Zosterops  | abyssinicus     | Pair          | Africa    | Resident  | 3         | (174)      |
| Zosteropidae | Zosteropidae    | Zosterops  | pallidus        | Pair          | Africa    | Resident  | 3         | (174)      |
| Zosteropidae | Zosteropidae    | Zosterops  | maderaspatanus  | Unknown       | Africa    | Resident  | 2         | (452)      |
| Zosteropidae | Zosteropidae    | Zosterops  | mouroniensis    | Unknown       | Africa    | Resident  | Endemic   | (46)       |
| Zosteropidae | Zosteropidae    | Zosterops  | ficedulinus     | Unknown       | Africa    | Resident  | Endemic 4 | (174)      |
| Zosteropidae | Zosteropidae    | Zosterops  | griseovirescens | Unknown       | Africa    | Resident  | Endemic 2 | (174)      |
| Zosteropidae | Zosteropidae    | Zosterops  | borbonicus      | Cooperation   | Africa    | Resident  | Endemic 2 | (69, 187)  |
| Zosteropidae | Zosteropidae    | Zosterops  | olivaceus       | Unknown       | Africa    | Resident  | Endemic 2 | (70)       |
| Zosteropidae | Zosteropidae    | Zosterops  | chloronothos    | Unknown       | Africa    | Resident  | Endemic   | (69)       |
| Zosteropidae | Zosteropidae    | Zosterops  | modestus        | Cooperation   | Africa    | Resident  | Endemic 2 | (452)      |
| Zosteropidae | Zosteropidae    | Zosterops  | ceylonensis     | Pair          | se Asia   | Resident  | 2         | (10)       |
| Zosteropidae | Zosteropidae    | Zosterops  | erythropleurus  | Unknown       | Paleartic | Migration |           | (320)      |
| Zosteropidae | Zosteropidae    | Zosterops  | palpebrosus     | Pair          | se Asia   | Resident  | 3         | (405)      |
| Zosteropidae | Zosteropidae    | Zosterops  | japonicus       | Occasional    | Paleartic | Partial   | 3         | (499)      |
| Zosteropidae | Zosteropidae    | Zosterops  | meyeni          | Unknown       | se Asia   | Resident  | 4         | (271)      |
| Zosteropidae | Zosteropidae    | Zosterops  | salvadorii      | Unknown       | se Asia   | Resident  | Endemic   | no source  |
| Zosteropidae | Zosteropidae    | Zosterops  | conspicillatus  | Unknown       | Australia | Resident  | Endemic 2 | (101, 314) |
| Zosteropidae | Zosteropidae    | Zosterops  | hypolais        | Unknown       | se Asia   | Resident  | Endemic   | (46)       |
| Zosteropidae | Zosteropidae    | Zosterops  | semperi         | Unknown       | se Asia   | Resident  | Endemic   | no source  |
| Zosteropidae | Zosteropidae    | Zosterops  | atricapillus    | Unknown       | se Asia   | Resident  |           | (459)      |
| Zosteropidae | Zosteropidae    | Zosterops  | everetti        | Unknown       | se Asia   | Resident  |           | (271)      |
| Zosteropidae | Zosteropidae    | Zosterops  | nigrorum        | Unknown       | se Asia   | Resident  |           | (271)      |
| Zosteropidae | Zosteropidae    | Zosterops  | montanus        | Unknown       | se Asia   | Resident  |           | (271)      |
| Zosteropidae | Zosteropidae    | Zosterops  | natalis         | Pair          | Australia | Resident  | Endemic 2 | (304)      |
| Zosteropidae | Zosteropidae    | Zosterops  | flavus          | Unknown       | se Asia   | Resident  |           | (459)      |
| Zosteropidae | Zosteropidae    | Zosterops  | chloris         | Unknown       | se Asia   | Resident  |           | (459)      |
| Zosteropidae | Zosteropidae    | Zosterops  | citrinellus     | Unknown       | Australia | Resident  | 3         | (304)      |
| Zosteropidae | Zosteropidae    | Zosterops  | grayi           | Unknown       | Australia | Resident  | Endemic   | (46)       |
| Zosteropidae | Zosteropidae    | Zosterops  | uropygialis     | Unknown       | Australia | Resident  | Endemic   | (46)       |
| Zosteropidae | Zosteropidae    | Zosterops  | consobrinorum   | Unknown       | Australia | Resident  |           | (88)       |
| Zosteropidae | Zosteropidae    | Zosterops  | anomalous       | Unknown       | Australia | Resident  |           | (88)       |
| Zosteropidae | Zosteropidae    | Zosterops  | wallacei        | Unknown       | Australia | Resident  | Endemic   | (88)       |
| Zosteropidae | Zosteropidae    | Zosterops  | atrifrons       | Unknown       | Australia | Resident  |           | (88)       |
| Zosteropidae | Zosteropidae    | Zosterops  | atriceps        | Unknown       | Australia | Resident  | Endemic   | (88)       |
| Zosteropidae | Zosteropidae    | Zosterops  | minor           | Unknown       | Australia | Resident  |           | (87)       |
| Zosteropidae | Zosteropidae    | Zosterops  | meeki           | Unknown       | Australia | Resident  |           | (87)       |
| Zosteropidae | Zosteropidae    | Zosterops  | hypoxanthus     | Unknown       | Australia | Resident  | Endemic 2 | (87)       |

| Family       | Clade Reference | Genus           | species         | Parental care | Region    | Movement    | Island  | Clutch      |
|--------------|-----------------|-----------------|-----------------|---------------|-----------|-------------|---------|-------------|
| Zosteropidae | Zosteropidae    | Zosterops       | mysorensis      | Unknown       | Australia | Resident    | Endemic | (46)        |
| Zosteropidae | Zosteropidae    | Zosterops       | fuscicapillus   | Unknown       | Australia | Resident    |         | (87)        |
| Zosteropidae | Zosteropidae    | Zosterops       | buruensis       | Unknown       | Australia | Resident    | Endemic | (88)        |
| Zosteropidae | Zosteropidae    | Zosterops       | kuehni          | Unknown       | Australia | Resident    | Endemic | (46)        |
| Zosteropidae | Zosteropidae    | Zosterops       | novaeaguineae   | Unknown       | Australia | Nomadic     |         | (87)        |
| Zosteropidae | Zosteropidae    | Zosterops       | luteus          | Pair          | Australia | Resident    |         | 3 (370)     |
| Zosteropidae | Zosteropidae    | Zosterops       | griseotinctus   | Unknown       | Australia | Resident    | Endemic | 2 (87)      |
| Zosteropidae | Zosteropidae    | Zosterops       | rennellianus    | Unknown       | Australia | Resident    | Endemic | no source   |
| Zosteropidae | Zosteropidae    | Zosterops       | vellalavella    | Unknown       | Australia | Resident    | Endemic | (46)        |
| Zosteropidae | Zosteropidae    | Zosterops       | splendidus      | Unknown       | Australia | Resident    | Endemic | (46)        |
| Zosteropidae | Zosteropidae    | Zosterops       | luteirostris    | Unknown       | Australia | Resident    | Endemic | (46)        |
| Zosteropidae | Zosteropidae    | Zosterops       | kulambangrae    | Unknown       | Australia | Resident    | Endemic | (87)        |
| Zosteropidae | Zosteropidae    | Zosterops       | murphyi         | Unknown       | Australia | Resident    | Endemic | no source   |
| Zosteropidae | Zosteropidae    | Zosterops       | metcalfei       | Unknown       | Australia | Resident    | Endemic | (87)        |
| Zosteropidae | Zosteropidae    | Zosterops       | rendovae        | Unknown       | Australia | Resident    | Endemic | no source   |
| Zosteropidae | Zosteropidae    | Zosterops       | stresemanni     | Unknown       | Australia | Resident    | Endemic | no source   |
| Zosteropidae | Zosteropidae    | Zosterops       | sanctaecrucis   | Unknown       | Australia | Resident    | Endemic | no source   |
| Zosteropidae | Zosteropidae    | Zosterops       | lateralis       | Pair          | Australia | Partial     |         | 3 (421)     |
| Zosteropidae | Zosteropidae    | Zosterops       | tephroleurus    | Unknown       | Australia | Resident    | Endemic | (304)       |
| Zosteropidae | Zosteropidae    | Zosterops       | strenuus        | Unknown       | Australia | Resident    | Endemic | (304)       |
| Zosteropidae | Zosteropidae    | Zosterops       | tenuirostris    | Unknown       | Australia | Resident    | Endemic | 2 (304)     |
| Zosteropidae | Zosteropidae    | Zosterops       | albogularis     | Unknown       | Australia | Resident    | Endemic | 2 (304)     |
| Zosteropidae | Zosteropidae    | Zosterops       | inornatus       | Unknown       | Australia | Resident    | Endemic | no source   |
| Zosteropidae | Zosteropidae    | Zosterops       | explorator      | Unknown       | Australia | Resident    | Endemic | (508)       |
| Zosteropidae | Zosteropidae    | Zosterops       | flavifrons      | Pair          | Australia | Resident    | Endemic | 3 (53)      |
| Zosteropidae | Zosteropidae    | Zosterops       | xanthochrous    | Pair          | Australia | Resident    | Endemic | 2 (220)     |
| Zosteropidae | Zosteropidae    | Zosterops       | minutus         | Unknown       | Australia | Resident    | Endemic | no source   |
| Zosteropidae | Zosteropidae    | Zosterops       | samoensis       | Unknown       | Australia | Resident    | Endemic | (508)       |
| Zosteropidae | Zosteropidae    | Zosterops       | finschii        | Unknown       | Australia | Resident    | Endemic | no source   |
| Zosteropidae | Zosteropidae    | Zosterops       | cinereus        | Unknown       | Australia | Resident    | Endemic | no source   |
| Zosteropidae | Zosteropidae    | Zosterops       | oleagineus      | Unknown       | Australia | Resident    | Endemic | (46)        |
| Zosteropidae | Zosteropidae    | Rukia           | longirostra     | Unknown       | Australia | Resident    | Endemic | (46)        |
| Zosteropidae | Zosteropidae    | Rukia           | ruki            | Unknown       | Australia | Resident    | Endemic | (46, 404)   |
| Zosteropidae | Zosteropidae    | Apalopteron     | familiaire      | Pair          | Australia | Resident    | Endemic | (230, 463)  |
| Zosteropidae | Zosteropidae    | Cleptornis      | marchei         | Pair          | se Asia   | Resident    | Endemic | 2 (467)     |
| Zosteropidae | Zosteropidae    | Tephrozosterops | stalker         | Unknown       | Australia | Resident    | Endemic | (88)        |
| Zosteropidae | Zosteropidae    | Madanga         | ruficollis      | Unknown       | se Asia   | Resident    | Endemic | (92)        |
| Zosteropidae | Zosteropidae    | Lophozosterops  | javanicus       | Unknown       | se Asia   | Resident    |         | (319)       |
| Zosteropidae | Zosteropidae    | Lophozosterops  | squamiceps      | Unknown       | Australia | Resident    |         | (88)        |
| Zosteropidae | Zosteropidae    | Lophozosterops  | goodfellowi     | Unknown       | se Asia   | Resident    |         | (271)       |
| Zosteropidae | Zosteropidae    | Lophozosterops  | superiliaris    | Unknown       | Australia | Resident    | Endemic | (88)        |
| Zosteropidae | Zosteropidae    | Lophozosterops  | pinaiae         | Unknown       | Australia | Resident    | Endemic | (88)        |
| Zosteropidae | Zosteropidae    | Lophozosterops  | dohertyi        | Unknown       | Australia | Resident    | Endemic | (88)        |
| Zosteropidae | Zosteropidae    | Oculocincta     | squamifrons     | Unknown       | se Asia   | Resident    |         | (459)       |
| Zosteropidae | Zosteropidae    | Heleia          | crassirostris   | Unknown       | Australia | Resident    | Endemic | (88)        |
| Zosteropidae | Zosteropidae    | Heleia          | muelleri        | Unknown       | Australia | Resident    | Endemic | (46)        |
| Zosteropidae | Zosteropidae    | Chlorocharis    | emiliae         | Unknown       | se Asia   | Resident    |         | (459)       |
| Zosteropidae | Zosteropidae    | Woodfordia      | superciliosa    | Unknown       | Australia | Resident    | Endemic | no source   |
| Zosteropidae | Zosteropidae    | Woodfordia      | lactosa         | Unknown       | Australia | Resident    | Endemic | (46)        |
| Zosteropidae | Zosteropidae    | Megazosterops   | palauensis      | Unknown       | Australia | Resident    | Endemic | (46)        |
| Zosteropidae | Zosteropidae    | Hypocryptadius  | cinnamomeus     | Unknown       | se Asia   | Resident    |         | (271)       |
| Pycnonotidae | Pycnonotidae    | Spizixos        | canifrons       | Unknown       | se Asia   | Altitudinal |         | 3 (5)       |
| Pycnonotidae | Pycnonotidae    | Spizixos        | semitorques     | Unknown       | se Asia   | Resident    |         | (320)       |
| Pycnonotidae | Pycnonotidae    | Pycnonotus      | zeylanicus      | Unknown       | se Asia   | Resident    |         | 2 (459)     |
| Pycnonotidae | Pycnonotidae    | Pycnonotus      | striatus        | Unknown       | se Asia   | Partial     |         | 3 (5)       |
| Pycnonotidae | Pycnonotidae    | Pycnonotus      | leucogrammicus  | Unknown       | se Asia   | Resident    |         | (319)       |
| Pycnonotidae | Pycnonotidae    | Pycnonotus      | tyimpanistrigus | Unknown       | se Asia   | Resident    |         | (46)        |
| Pycnonotidae | Pycnonotidae    | Pycnonotus      | melanoleucos    | Unknown       | se Asia   | Nomadic     |         | (459)       |
| Pycnonotidae | Pycnonotidae    | Pycnonotus      | priocephalus    | Unknown       | se Asia   | Resident    |         | 1 (5)       |
| Pycnonotidae | Pycnonotidae    | Pycnonotus      | atriceps        | Pair          | se Asia   | Resident    |         | 2 (5, 305)  |
| Pycnonotidae | Pycnonotidae    | Pycnonotus      | melanicterus    | Pair          | se Asia   | Resident    |         | 3 (5)       |
| Pycnonotidae | Pycnonotidae    | Pycnonotus      | squamatus       | Unknown       | se Asia   | Resident    |         | (46)        |
| Pycnonotidae | Pycnonotidae    | Pycnonotus      | cyaniventris    | Unknown       | se Asia   | Resident    |         | 2 (459)     |
| Pycnonotidae | Pycnonotidae    | Pycnonotus      | jocosus         | Pair          | se Asia   | Resident    |         | 3 (5)       |
| Pycnonotidae | Pycnonotidae    | Pycnonotus      | xanthorrhous    | Unknown       | se Asia   | Resident    |         | (320)       |
| Pycnonotidae | Pycnonotidae    | Pycnonotus      | sinensis        | Unknown       | se Asia   | Resident    |         | (320)       |
| Pycnonotidae | Pycnonotidae    | Pycnonotus      | taivanus        | Pair          | se Asia   | Resident    |         | 3 (92, 240) |
| Pycnonotidae | Pycnonotidae    | Pycnonotus      | barbatus        | Cooperation   | Africa    | Resident    |         | 3 (103)     |
| Pycnonotidae | Pycnonotidae    | Pycnonotus      | somaliensis     | Unknown       | Africa    | Resident    |         | (269)       |
| Pycnonotidae | Pycnonotidae    | Pycnonotus      | dodsoni         | Unknown       | Africa    | Resident    |         | (269)       |
| Pycnonotidae | Pycnonotidae    | Pycnonotus      | tricolor        | Unknown       | Africa    | Resident    |         | (269)       |
| Pycnonotidae | Pycnonotidae    | Pycnonotus      | nigricans       | Pair          | Africa    | Partial     |         | 3 (269)     |
| Pycnonotidae | Pycnonotidae    | Pycnonotus      | capensis        | Pair          | Africa    | Resident    |         | 3 (269)     |

| Family       | Clade Reference | Genus          | species          | Parental care | Region      | Movement | Island | Clutch     |
|--------------|-----------------|----------------|------------------|---------------|-------------|----------|--------|------------|
| Pycnonotidae | Pycnonotidae    | Pycnonotus     | xanthopygos      | Pair          | Palaearctic | Resident |        | 3 (103)    |
| Pycnonotidae | Pycnonotidae    | Pycnonotus     | leucotis         | Unknown       | Palaearctic | Resident |        | 3 (5)      |
| Pycnonotidae | Pycnonotidae    | Pycnonotus     | leucogenys       | Suspected     | Palaearctic | Resident |        | 3 (103)    |
| Pycnonotidae | Pycnonotidae    | Pycnonotus     | cafer            | Pair          | se Asia     | Resident |        | 2 (5)      |
| Pycnonotidae | Pycnonotidae    | Pycnonotus     | aurigaster       | Unknown       | se Asia     | Resident |        | (319)      |
| Pycnonotidae | Pycnonotidae    | Pycnonotus     | eutilotus        | Unknown       | se Asia     | Resident |        | (46)       |
| Pycnonotidae | Pycnonotidae    | Pycnonotus     | nieuwenhuisii    | Unknown       | se Asia     | Resident |        | (459)      |
| Pycnonotidae | Pycnonotidae    | Pycnonotus     | urostictus       | Unknown       | se Asia     | Resident | 3      | (271)      |
| Pycnonotidae | Pycnonotidae    | Pycnonotus     | bimaculatus      | Unknown       | se Asia     | Resident |        | (319)      |
| Pycnonotidae | Pycnonotidae    | Pycnonotus     | finlaysoni       | Pair          | se Asia     | Resident | 2      | (305)      |
| Pycnonotidae | Pycnonotidae    | Pycnonotus     | xantholaemus     | Unknown       | se Asia     | Resident | 2      | (92)       |
| Pycnonotidae | Pycnonotidae    | Pycnonotus     | penicillatus     | Unknown       | se Asia     | Resident | 2      | (5)        |
| Pycnonotidae | Pycnonotidae    | Pycnonotus     | flavescens       | Pair          | se Asia     | Resident | 2      | (5)        |
| Pycnonotidae | Pycnonotidae    | Pycnonotus     | luteolus         | Unknown       | se Asia     | Resident | 2      | (5)        |
| Pycnonotidae | Pycnonotidae    | Pycnonotus     | goiavier         | Pair          | se Asia     | Resident | 2      | (459)      |
| Pycnonotidae | Pycnonotidae    | Pycnonotus     | plumosus         | Pair          | se Asia     | Resident | 2      | (459)      |
| Pycnonotidae | Pycnonotidae    | Pycnonotus     | blanfordi        | Unknown       | se Asia     | Resident |        | (305)      |
| Pycnonotidae | Pycnonotidae    | Pycnonotus     | simplex          | Unknown       | se Asia     | Resident | 2      | (459)      |
| Pycnonotidae | Pycnonotidae    | Pycnonotus     | brunneus         | Pair          | se Asia     | Resident | 2      | (459)      |
| Pycnonotidae | Pycnonotidae    | Pycnonotus     | erythrophthalmos | Unknown       | se Asia     | Resident | 2      | (459)      |
| Pycnonotidae | Pycnonotidae    | Andropadus     | montanus         | Unknown       | Africa      | Resident |        | (269)      |
| Pycnonotidae | Pycnonotidae    | Andropadus     | kakamegae        | Unknown       | Africa      | Resident |        | (269)      |
| Pycnonotidae | Pycnonotidae    | Andropadus     | masukuensis      | Unknown       | Africa      | Resident |        | (269)      |
| Pycnonotidae | Pycnonotidae    | Andropadus     | viridus          | Pair          | Africa      | Resident |        | (269)      |
| Pycnonotidae | Pycnonotidae    | Andropadus     | hallae           | Unknown       | Africa      | Resident |        | (269)      |
| Pycnonotidae | Pycnonotidae    | Andropadus     | gracilis         | Unknown       | Africa      | Resident |        | (269)      |
| Pycnonotidae | Pycnonotidae    | Andropadus     | ansorgei         | Unknown       | Africa      | Resident |        | (269)      |
| Pycnonotidae | Pycnonotidae    | Andropadus     | curvirostris     | Unknown       | Africa      | Resident |        | (269)      |
| Pycnonotidae | Pycnonotidae    | Andropadus     | gracilirostris   | Unknown       | Africa      | Resident |        | (269)      |
| Pycnonotidae | Pycnonotidae    | Andropadus     | importunus       | Pair          | Africa      | Resident | 2      | (269)      |
| Pycnonotidae | Pycnonotidae    | Andropadus     | latirostris      | Uniparental   | Africa      | Nomadic  | 2      | (269)      |
| Pycnonotidae | Pycnonotidae    | Andropadus     | tephrolaemus     | Pair          | Africa      | Resident |        | (269)      |
| Pycnonotidae | Pycnonotidae    | Andropadus     | nigriceps        | Unknown       | Africa      | Resident |        | (269)      |
| Pycnonotidae | Pycnonotidae    | Andropadus     | chlorigula       | Unknown       | Africa      | Resident |        | (269)      |
| Pycnonotidae | Pycnonotidae    | Andropadus     | olivaceiceps     | Unknown       | Africa      | Resident | 2      | (269)      |
| Pycnonotidae | Pycnonotidae    | Andropadus     | milanjensis      | Pair          | Africa      | Resident | 2      | (269)      |
| Pycnonotidae | Pycnonotidae    | Calyptocichla  | serina           | Unknown       | Africa      | Resident |        | (269)      |
| Pycnonotidae | Pycnonotidae    | Baeopogon      | indicator        | Unknown       | Africa      | Resident |        | (269)      |
| Pycnonotidae | Pycnonotidae    | Baeopogon      | clamans          | Unknown       | Africa      | Resident |        | (269)      |
| Pycnonotidae | Pycnonotidae    | Ixonotus       | guttatus         | Cooperation   | Africa      | Resident |        | (269)      |
| Pycnonotidae | Pycnonotidae    | Chlorocichla   | simplex          | Unknown       | Africa      | Resident | 2      | (269)      |
| Pycnonotidae | Pycnonotidae    | Chlorocichla   | flavicollis      | Cooperation   | Africa      | Resident | 2      | (269)      |
| Pycnonotidae | Pycnonotidae    | Chlorocichla   | falkensteini     | Unknown       | Africa      | Resident | 2      | (269)      |
| Pycnonotidae | Pycnonotidae    | Chlorocichla   | flaviventris     | Pair          | Africa      | Resident | 2      | (269)      |
| Pycnonotidae | Pycnonotidae    | Chlorocichla   | laetissima       | Unknown       | Africa      | Resident |        | (269)      |
| Pycnonotidae | Pycnonotidae    | Chlorocichla   | prigoginei       | Unknown       | Africa      | Resident |        | (269)      |
| Pycnonotidae | Pycnonotidae    | Thescelocichla | leucopleura      | Cooperation   | Africa      | Resident |        | (269)      |
| Pycnonotidae | Pycnonotidae    | Phyllastrephus | scandens         | Suspected     | Africa      | Resident |        | (269)      |
| Pycnonotidae | Pycnonotidae    | Phyllastrephus | cabanisi         | Pair          | Africa      | Resident | 2      | (269)      |
| Pycnonotidae | Pycnonotidae    | Phyllastrephus | fischeri         | Unknown       | Africa      | Resident |        | (269)      |
| Pycnonotidae | Pycnonotidae    | Phyllastrephus | placidus         | Unknown       | Africa      | Resident |        | (269)      |
| Pycnonotidae | Pycnonotidae    | Phyllastrephus | terrestris       | Unknown       | Africa      | Resident | 2      | (269)      |
| Pycnonotidae | Pycnonotidae    | Phyllastrephus | strepitans       | Unknown       | Africa      | Resident |        | (269)      |
| Pycnonotidae | Pycnonotidae    | Phyllastrephus | fulviventris     | Unknown       | Africa      | Resident |        | (269)      |
| Pycnonotidae | Pycnonotidae    | Phyllastrephus | cerviniventris   | Pair          | Africa      | Resident | 2      | (269)      |
| Pycnonotidae | Pycnonotidae    | Phyllastrephus | baumanni         | Unknown       | Africa      | Resident |        | (155, 269) |
| Pycnonotidae | Pycnonotidae    | Phyllastrephus | poensis          | Unknown       | Africa      | Resident |        | (269)      |
| Pycnonotidae | Pycnonotidae    | Phyllastrephus | hypochloris      | Unknown       | Africa      | Resident | 2      | (269)      |
| Pycnonotidae | Pycnonotidae    | Phyllastrephus | lorenzi          | Unknown       | Africa      | Resident |        | (269)      |
| Pycnonotidae | Pycnonotidae    | Phyllastrephus | poliocephalus    | Unknown       | Africa      | Resident |        | (269)      |
| Pycnonotidae | Pycnonotidae    | Phyllastrephus | flavostriatus    | Pair          | Africa      | Resident | 2      | (269)      |
| Pycnonotidae | Pycnonotidae    | Phyllastrephus | alfredi          | Unknown       | Africa      | Resident |        | (269)      |
| Pycnonotidae | Pycnonotidae    | Phyllastrephus | debilis          | Pair          | Africa      | Resident | 2      | (269)      |
| Pycnonotidae | Pycnonotidae    | Phyllastrephus | albigularis      | Unknown       | Africa      | Resident | 2      | (269)      |
| Pycnonotidae | Pycnonotidae    | Phyllastrephus | icterinus        | Pair          | Africa      | Resident | 2      | (269)      |
| Pycnonotidae | Pycnonotidae    | Phyllastrephus | leucolepis       | Unknown       | Africa      | Resident |        | (269)      |
| Pycnonotidae | Pycnonotidae    | Phyllastrephus | xavieri          | Pair          | Africa      | Resident | 2      | (269)      |
| Pycnonotidae | Pycnonotidae    | Phyllastrephus | madagascariensis | Unknown       | Africa      | Resident |        | (284)      |
| Pycnonotidae | Pycnonotidae    | Phyllastrephus | zosterops        | Unknown       | Africa      | Resident | 3      | (284)      |
| Pycnonotidae | Pycnonotidae    | Phyllastrephus | aperti           | Unknown       | Africa      | Resident |        | (284)      |
| Pycnonotidae | Pycnonotidae    | Phyllastrephus | tenebrosus       | Unknown       | Africa      | Resident |        | (284)      |
| Pycnonotidae | Pycnonotidae    | Phyllastrephus | cinereiceps      | Unknown       | Africa      | Resident | 3      | (284)      |
| Pycnonotidae | Pycnonotidae    | Bleda          | syndactyla       | Pair          | Africa      | Resident | 2      | (269)      |

| Family       | Clade Reference    | Genus          | species          | Parental care | Region      | Movement    | Island  | Clutch       |
|--------------|--------------------|----------------|------------------|---------------|-------------|-------------|---------|--------------|
| Pycnonotidae | Pycnonotidae       | Bleda          | eximia           | Pair          | Africa      | Resident    |         | 2 (269)      |
| Pycnonotidae | Pycnonotidae       | Bleda          | canicapilla      | Unknown       | Africa      | Resident    |         | 2 (269)      |
| Pycnonotidae | Pycnonotidae       | Nicator        | chloris          | Pair          | Africa      | Resident    |         | 1 (174)      |
| Pycnonotidae | Pycnonotidae       | Nicator        | gularis          | Pair          | Africa      | Resident    |         | 2 (174)      |
| Pycnonotidae | Pycnonotidae       | Nicator        | vireo            | Pair          | Africa      | Resident    |         | 2 (174)      |
| Pycnonotidae | Pycnonotidae       | Criniger       | barbatus         | Unknown       | Africa      | Resident    |         | (269)        |
| Pycnonotidae | Pycnonotidae       | Criniger       | chloronotus      | Suspected     | Africa      | Resident    |         | 2 (269)      |
| Pycnonotidae | Pycnonotidae       | Criniger       | calurus          | Suspected     | Africa      | Resident    |         | 2 (269)      |
| Pycnonotidae | Pycnonotidae       | Criniger       | olivaceus        | Unknown       | Africa      | Resident    |         | (269)        |
| Pycnonotidae | Pycnonotidae       | Criniger       | ndussumensis     | Unknown       | Africa      | Resident    |         | (269)        |
| Pycnonotidae | Pycnonotidae       | Alophoixus     | finschii         | Unknown       | se Asia     | Resident    |         | (46)         |
| Pycnonotidae | Pycnonotidae       | Alophoixus     | flaveolus        | Pair          | se Asia     | Resident    |         | 3 (5)        |
| Pycnonotidae | Pycnonotidae       | Alophoixus     | pallidus         | Unknown       | se Asia     | Resident    |         | (320)        |
| Pycnonotidae | Pycnonotidae       | Alophoixus     | ochraceus        | Unknown       | se Asia     | Resident    |         | 2 (459)      |
| Pycnonotidae | Pycnonotidae       | Alophoixus     | bres             | Unknown       | se Asia     | Resident    |         | (305)        |
| Pycnonotidae | Pycnonotidae       | Alophoixus     | phaeocephalus    | Unknown       | se Asia     | Resident    |         | 2 (459)      |
| Pycnonotidae | Pycnonotidae       | Alophoixus     | affinis          | Unknown       | Australia   | Resident    | Endemic | (88)         |
| Pycnonotidae | Pycnonotidae       | Setornis       | criniger         | Unknown       | se Asia     | Resident    |         | (92)         |
| Pycnonotidae | Pycnonotidae       | Tricholestes   | criniger         | Unknown       | se Asia     | Resident    |         | (459)        |
| Pycnonotidae | Pycnonotidae       | lole           | virescens        | Unknown       | se Asia     | Resident    |         | 3 (5)        |
| Pycnonotidae | Pycnonotidae       | lole           | propinqua        | Unknown       | se Asia     | Resident    |         | (305)        |
| Pycnonotidae | Pycnonotidae       | lole           | olivacea         | Unknown       | se Asia     | Resident    |         | (46)         |
| Pycnonotidae | Pycnonotidae       | lole           | indica           | Unknown       | se Asia     | Resident    |         | 2 (5)        |
| Pycnonotidae | Pycnonotidae       | Ixos           | palawanensis     | Unknown       | se Asia     | Resident    |         | (271)        |
| Pycnonotidae | Pycnonotidae       | Ixos           | philippinus      | Unknown       | se Asia     | Resident    |         | 3 (271)      |
| Pycnonotidae | Pycnonotidae       | Ixos           | rufigularis      | Unknown       | se Asia     | Resident    |         | (271)        |
| Pycnonotidae | Pycnonotidae       | Ixos           | siquijorensis    | Unknown       | se Asia     | Resident    | Endemic | (92)         |
| Pycnonotidae | Pycnonotidae       | Ixos           | amaurotis        | Pair          | se Asia     | Resident    |         | 4 (52)       |
| Pycnonotidae | Pycnonotidae       | Ixos           | everetti         | Unknown       | se Asia     | Resident    |         | (271)        |
| Pycnonotidae | Pycnonotidae       | Ixos           | malaccensis      | Unknown       | se Asia     | Resident    |         | 2 (46, 305)  |
| Pycnonotidae | Pycnonotidae       | Hemixos        | flavala          | Pair          | se Asia     | Resident    |         | 3 (5)        |
| Pycnonotidae | Pycnonotidae       | Hemixos        | castanonotus     | Unknown       | se Asia     | Resident    |         | (320)        |
| Pycnonotidae | Pycnonotidae       | Hypsipetes     | mcclellandii     | Unknown       | se Asia     | Altitudinal |         | 2 (5)        |
| Pycnonotidae | Pycnonotidae       | Hypsipetes     | virescens        | Unknown       | se Asia     | Resident    |         | no source    |
| Pycnonotidae | Pycnonotidae       | Hypsipetes     | madagascariensis | Unknown       | Africa      | Resident    |         | 3 (284)      |
| Pycnonotidae | Pycnonotidae       | Hypsipetes     | crassirostris    | Pair          | Africa      | Resident    | Endemic | 2 (452)      |
| Pycnonotidae | Pycnonotidae       | Hypsipetes     | parvirostris     | Unknown       | Africa      | Resident    | Endemic | no source    |
| Pycnonotidae | Pycnonotidae       | Hypsipetes     | borbonicus       | Unknown       | Africa      | Resident    | Endemic | 2 (69, 70)   |
| Pycnonotidae | Pycnonotidae       | Hypsipetes     | leucocephalus    | Unknown       | se Asia     | Partial     |         | 3 (5)        |
| Pycnonotidae | Pycnonotidae       | Hypsipetes     | nicobariensis    | Unknown       | se Asia     | Resident    | Endemic | (92)         |
| Pycnonotidae | Pycnonotidae       | Hypsipetes     | hypsoni          | Unknown       | se Asia     | Resident    |         | 2 (425)      |
| Pycnonotidae | Pycnonotidae       | Neolestes      | torquatus        | Pair          | Africa      | Resident    |         | 2 (174)      |
| Pycnonotidae | Pycnonotidae       | Malia          | grata            | Unknown       | se Asia     | Resident    |         | (88)         |
| Hypocoliidae | Hypocoliidae       | Hypocolius     | ampelinus        | Pair          | Palaearctic | Migration   |         | 4 (103)      |
| Hirundinidae | Pseudocheliconinae | Pseudochelidon | eurystomina      | Pair          | Africa      | Migration   |         | 3 (489)      |
| Hirundinidae | Pseudocheliconinae | Pseudochelidon | sirintarae       | Unknown       | se Asia     | Migration   |         | (489)        |
| Hirundinidae | Hirundininae       | Tachycineta    | bicolor          | Occasional    | America     | Migration   |         | 5 (423)      |
| Hirundinidae | Hirundininae       | Tachycineta    | albilinea        | Pair          | America     | Resident    |         | 4 (489)      |
| Hirundinidae | Hirundininae       | Tachycineta    | albiventer       | Unknown       | America     | Partial     |         | 4 (73, 489)  |
| Hirundinidae | Hirundininae       | Tachycineta    | leucorrhoa       | Unknown       | America     | Partial     |         | 6 (489)      |
| Hirundinidae | Hirundininae       | Tachycineta    | meyeni           | Unknown       | America     | Resident    |         | 5 (489)      |
| Hirundinidae | Hirundininae       | Tachycineta    | thalassina       | Occasional    | America     | Partial     |         | 4 (61)       |
| Hirundinidae | Hirundininae       | Tachycineta    | cyaneoviridis    | Pair          | America     | Resident    | Endemic | 3 (489)      |
| Hirundinidae | Hirundininae       | Tachycineta    | euchrysea        | Unknown       | America     | Resident    | Endemic | 3 (489)      |
| Hirundinidae | Hirundininae       | Phaeoprogne    | tapera           | Occasional    | America     | Partial     |         | 4 (163)      |
| Hirundinidae | Hirundininae       | Progne         | subis            | Pair          | Nearctic    | Migration   |         | 4 (59)       |
| Hirundinidae | Hirundininae       | Progne         | cryptoleuca      | Unknown       | America     | Migration   | Endemic | (489)        |
| Hirundinidae | Hirundininae       | Progne         | dominicensis     | Pair          | America     | Resident    | Endemic | 4 (489)      |
| Hirundinidae | Hirundininae       | Progne         | sinaloae         | Unknown       | America     | Migration   |         | (489)        |
| Hirundinidae | Hirundininae       | Progne         | chalybea         | Pair          | America     | Migration   |         | 3 (489)      |
| Hirundinidae | Hirundininae       | Progne         | modesta          | Unknown       | America     | Migration   |         | 3 (489)      |
| Hirundinidae | Hirundininae       | Notiochelidon  | murina           | Unknown       | America     | Resident    |         | 2 (234, 489) |
| Hirundinidae | Hirundininae       | Notiochelidon  | cyanoleuca       | Pair          | America     | Partial     |         | 4 (73, 489)  |
| Hirundinidae | Hirundininae       | Notiochelidon  | flavipes         | Unknown       | America     | Resident    |         | (489)        |
| Hirundinidae | Hirundininae       | Notiochelidon  | pileata          | Pair          | America     | Migration   |         | 4 (489)      |
| Hirundinidae | Hirundininae       | Atticora       | fasciata         | Unknown       | America     | Resident    |         | 4 (489)      |
| Hirundinidae | Hirundininae       | Atticora       | melanoleuca      | Pair          | America     | Resident    |         | 3 (489)      |
| Hirundinidae | Hirundininae       | Neochelidon    | tibialis         | Unknown       | America     | Resident    |         | (489)        |
| Hirundinidae | Hirundininae       | Stelgidopteryx | fucata           | Pair          | America     | Partial     |         | (489)        |
| Hirundinidae | Hirundininae       | Stelgidopteryx | serripennis      | Occasional    | Nearctic    | Migration   |         | 6 (117, 236) |
| Hirundinidae | Hirundininae       | Stelgidopteryx | ridgwayi         | Unknown       | America     | Resident    |         | (489)        |
| Hirundinidae | Hirundininae       | Stelgidopteryx | ruficollis       | Pair          | America     | Migration   |         | 4 (489)      |
| Hirundinidae | Hirundininae       | Cheramoeca     | leucosternus     | Pair          | Australia   | Resident    |         | 5 (489)      |

| Family        | Clade Reference | Genus         | species      | Parental care | Region      | Movement    | Island  | Clutch  |
|---------------|-----------------|---------------|--------------|---------------|-------------|-------------|---------|---------|
| Hirundinidae  | Hirundininae    | Riparia       | riparia      | Pair          | Palaearctic | Migration   |         | 5 (179) |
| Hirundinidae  | Hirundininae    | Riparia       | paludicola   | Pair          | Africa      | Resident    |         | 3 (103) |
| Hirundinidae  | Hirundininae    | Riparia       | congica      | Unknown       | Africa      | Resident    |         | (489)   |
| Hirundinidae  | Hirundininae    | Riparia       | cincta       | Pair          | Africa      | Migration   |         | 3 (489) |
| Hirundinidae  | Hirundininae    | Phedina       | borbonica    | Pair          | Africa      | Partial     |         | 2 (489) |
| Hirundinidae  | Hirundininae    | Phedina       | brazzae      | Unknown       | Africa      | Resident    |         | 3 (489) |
| Hirundinidae  | Hirundininae    | Hirundo       | griseopyga   | Pair          | Africa      | Partial     |         | 3 (489) |
| Hirundinidae  | Hirundininae    | Hirundo       | rupestris    | Pair          | Palaearctic | Partial     |         | 3 (103) |
| Hirundinidae  | Hirundininae    | Hirundo       | obsoleta     | Unknown       | Africa      | Migration   |         | (489)   |
| Hirundinidae  | Hirundininae    | Hirundo       | fuligula     | Pair          | Africa      | Resident    |         | 2 (103) |
| Hirundinidae  | Hirundininae    | Hirundo       | concolor     | Pair          | se Asia     | Nomadic     |         | 3 (489) |
| Hirundinidae  | Hirundininae    | Hirundo       | rustica      | Occasional    | Holarctic   | Migration   |         | 5 (103) |
| Hirundinidae  | Hirundininae    | Hirundo       | lucida       | Unknown       | Africa      | Partial     |         | 3 (489) |
| Hirundinidae  | Hirundininae    | Hirundo       | aethiopica   | Pair          | Africa      | Resident    |         | 3 (489) |
| Hirundinidae  | Hirundininae    | Hirundo       | angolensis   | Pair          | Africa      | Partial     |         | 3 (489) |
| Hirundinidae  | Hirundininae    | Hirundo       | albigularis  | Pair          | Africa      | Partial     |         | 3 (489) |
| Hirundinidae  | Hirundininae    | Hirundo       | domicola     | Unknown       | se Asia     | Resident    |         | (489)   |
| Hirundinidae  | Hirundininae    | Hirundo       | tahitica     | Pair          | se Asia     | Resident    |         | 3 (489) |
| Hirundinidae  | Hirundininae    | Hirundo       | neoxena      | Pair          | Australia   | Partial     |         | 4 (489) |
| Hirundinidae  | Hirundininae    | Hirundo       | smithii      | Pair          | Africa      | Partial     |         | 3 (489) |
| Hirundinidae  | Hirundininae    | Hirundo       | nigrita      | Pair          | Africa      | Resident    |         | 3 (489) |
| Hirundinidae  | Hirundininae    | Hirundo       | nigrorufa    | Pair          | Africa      | Partial     |         | 3 (489) |
| Hirundinidae  | Hirundininae    | Hirundo       | atrocaerulea | Cooperation   | Africa      | Partial     |         | 3 (129) |
| Hirundinidae  | Hirundininae    | Hirundo       | leucosoma    | Pair          | Africa      | Partial     |         | 4 (489) |
| Hirundinidae  | Hirundininae    | Hirundo       | megaensis    | Unknown       | Africa      | Resident    |         | (489)   |
| Hirundinidae  | Hirundininae    | Hirundo       | dimidiata    | Pair          | Africa      | Partial     |         | 3 (489) |
| Hirundinidae  | Hirundininae    | Hirundo       | cucullata    | Pair          | Africa      | Partial     |         | 3 (489) |
| Hirundinidae  | Hirundininae    | Hirundo       | abyssinica   | Pair          | Africa      | Partial     |         | 3 (489) |
| Hirundinidae  | Hirundininae    | Hirundo       | semirufa     | Pair          | Africa      | Partial     |         | 3 (489) |
| Hirundinidae  | Hirundininae    | Hirundo       | senegalensis | Pair          | Africa      | Partial     |         | 3 (489) |
| Hirundinidae  | Hirundininae    | Hirundo       | daurica      | Pair          | Palaearctic | Migration   |         | 4 (103) |
| Hirundinidae  | Hirundininae    | Hirundo       | domicella    | Unknown       | Africa      | Resident    |         | (489)   |
| Hirundinidae  | Hirundininae    | Hirundo       | striolata    | Unknown       | se Asia     | Partial     |         | 4 (489) |
| Hirundinidae  | Hirundininae    | Hirundo       | perdita      | Unknown       | Africa      | Resident    |         | (489)   |
| Hirundinidae  | Hirundininae    | Hirundo       | preussi      | Pair          | Africa      | Partial     |         | 2 (489) |
| Hirundinidae  | Hirundininae    | Hirundo       | rufigula     | Pair          | Africa      | Partial     |         | 2 (489) |
| Hirundinidae  | Hirundininae    | Hirundo       | spilodera    | Pair          | Africa      | Partial     |         | 2 (489) |
| Hirundinidae  | Hirundininae    | Hirundo       | andecola     | Unknown       | America     | Resident    |         | (489)   |
| Hirundinidae  | Hirundininae    | Hirundo       | pyrrhonota   | Pair          | America     | Partial     |         | 3 (60)  |
| Hirundinidae  | Hirundininae    | Hirundo       | fulva        | Pair          | Nearctic    | Partial     |         | 4 (514) |
| Hirundinidae  | Hirundininae    | Hirundo       | rufocollaris | Unknown       | America     | Resident    |         | (489)   |
| Hirundinidae  | Hirundininae    | Hirundo       | nigricans    | Pair          | Australia   | Migration   |         | 4 (489) |
| Hirundinidae  | Hirundininae    | Hirundo       | fluvicola    | Pair          | se Asia     | Altitudinal |         | 3 (489) |
| Hirundinidae  | Hirundininae    | Hirundo       | ariel        | Pair          | Australia   | Partial     |         | 4 (489) |
| Hirundinidae  | Hirundininae    | Hirundo       | fuliginosa   | Pair          | Africa      | Partial     |         | 2 (269) |
| Hirundinidae  | Hirundininae    | Delichon      | urbica       | Cooperation   | Palaearctic | Migration   |         | 4 (103) |
| Hirundinidae  | Hirundininae    | Delichon      | dasyopus     | Pair          | Palaearctic | Migration   |         | 4 (489) |
| Hirundinidae  | Hirundininae    | Delichon      | nipalensis   | Pair          | Palaearctic | Resident    |         | (489)   |
| Hirundinidae  | Hirundininae    | Psalidoprocne | nitens       | Pair          | Africa      | Resident    |         | 2 (489) |
| Hirundinidae  | Hirundininae    | Psalidoprocne | fuliginosa   | Pair          | Africa      | Partial     |         | 2 (489) |
| Hirundinidae  | Hirundininae    | Psalidoprocne | albiceps     | Pair          | Africa      | Partial     |         | 3 (489) |
| Hirundinidae  | Hirundininae    | Psalidoprocne | chalybea     | Unknown       | Africa      | Resident    |         | (489)   |
| Hirundinidae  | Hirundininae    | Psalidoprocne | petiti       | Unknown       | Africa      | Resident    |         | (489)   |
| Hirundinidae  | Hirundininae    | Psalidoprocne | mangbettorum | Unknown       | Africa      | Resident    |         | (489)   |
| Hirundinidae  | Hirundininae    | Psalidoprocne | oleaginea    | Unknown       | Africa      | Resident    |         | (489)   |
| Hirundinidae  | Hirundininae    | Psalidoprocne | pristoptera  | Pair          | Africa      | Partial     |         | 2 (489) |
| Hirundinidae  | Hirundininae    | Psalidoprocne | antinorii    | Unknown       | Africa      | Resident    |         | (489)   |
| Hirundinidae  | Hirundininae    | Psalidoprocne | orientalis   | Unknown       | Africa      | Altitudinal |         | (489)   |
| Hirundinidae  | Hirundininae    | Psalidoprocne | holomelas    | Unknown       | Africa      | Migration   |         | (489)   |
| Hirundinidae  | Hirundininae    | Psalidoprocne | obscura      | Pair          | Africa      | Partial     |         | 2 (489) |
| Bombycillidae | Dulini          | Dulus         | dominicus    | Unknown       | America     | Resident    | Endemic | (515)   |
| Bombycillidae | Ptiloganitini   | Ptilogonys    | cinereus     | Pair          | America     | Resident    |         | 2 (239) |
| Bombycillidae | Ptiloganitini   | Ptilogonys    | caudatus     | Pair          | America     | Resident    |         | 2 (466) |
| Bombycillidae | Ptiloganitini   | Phainopepla   | nitens       | Pair          | America     | Resident    |         | 2 (78)  |
| Bombycillidae | Ptiloganitini   | Phainoptila   | melanoxantha | Pair          | America     | Resident    |         | 2 (466) |
| Bombycillidae | Bombycillini    | Bombycilla    | garrulus     | Pair          | Palaearctic | Nomadic     |         | 5 (103) |
| Bombycillidae | Bombycillini    | Bombycilla    | japonica     | Pair          | Palaearctic | Migration   |         | (158)   |
| Bombycillidae | Bombycillini    | Bombycilla    | cedrorum     | Pair          | Nearctic    | Migration   |         | 4 (524) |
| Paridae       | Remizinae       | Remiz         | pendulinus   | Uniparental   | Palaearctic | Migration   |         | 5 (442) |
| Paridae       | Remizinae       | Remiz         | coronatus    | Unknown       | Palaearctic | Migration   |         | 6 (221) |
| Paridae       | Remizinae       | Remiz         | consobrinus  | Pair          | Palaearctic | Migration   |         | 6 (221) |
| Paridae       | Remizinae       | Anthoscopus   | punctifrons  | Unknown       | Palaearctic | Migration   |         | 7 (221) |
| Paridae       | Remizinae       | Anthoscopus   | parvulus     | Unknown       | Africa      | Resident    |         | 2 (221) |



| Family       | Clade Reference | Genus        | species        | Parental care | Region    | Movement    | Island  | Clutch       |
|--------------|-----------------|--------------|----------------|---------------|-----------|-------------|---------|--------------|
| Paridae      | Remizinae       | Anthoscopus  | musculus       | Unknown       | Africa    | Resident    |         | 2 (221)      |
| Paridae      | Remizinae       | Anthoscopus  | flavifrons     | Unknown       | Africa    | Resident    |         | 4 (221)      |
| Paridae      | Remizinae       | Anthoscopus  | caroli         | Suspected     | Africa    | Resident    |         | (174)        |
| Paridae      | Remizinae       | Anthoscopus  | sylviella      | Cooperation   | Africa    | Resident    |         | 5 (221)      |
| Paridae      | Remizinae       | Anthoscopus  | minutus        | Suspected     | Africa    | Resident    |         | 3 (221)      |
| Paridae      | Remizinae       | Cephalopyrus | flammiceps     | Pair          | se Asia   | Partial     |         | 4 (221)      |
| Paridae      | Remizinae       | Pholidornis  | rushiae        | Cooperation   | Africa    | Resident    |         | 2 (174)      |
| Paridae      | Parinae         | Parus        | palustris      | Pair          | Paleartic | Resident    |         | 8 (105)      |
| Paridae      | Parinae         | Parus        | lugubris       | Occasional    | Paleartic | Resident    |         | 6 (105)      |
| Paridae      | Parinae         | Parus        | montanus       | Pair          | Paleartic | Resident    |         | 7 (105)      |
| Paridae      | Parinae         | Parus        | carolinensis   | Pair          | Nearctic  | Resident    |         | 5 (221)      |
| Paridae      | Parinae         | Parus        | atricapillus   | Pair          | Nearctic  | Resident    |         | 7 (458)      |
| Paridae      | Parinae         | Parus        | gambeli        | Pair          | Nearctic  | Partial     |         | 7 (336)      |
| Paridae      | Parinae         | Parus        | sclateri       | Unknown       | America   | Resident    |         | 7 (152)      |
| Paridae      | Parinae         | Parus        | supercilius    | Pair          | Paleartic | Resident    |         | (221)        |
| Paridae      | Parinae         | Parus        | davidi         | Unknown       | Paleartic | Resident    |         | (221)        |
| Paridae      | Parinae         | Parus        | cinctus        | Pair          | Paleartic | Resident    |         | 8 (105)      |
| Paridae      | Parinae         | Parus        | hudsonicus     | Pair          | Nearctic  | Resident    |         | 6 (153)      |
| Paridae      | Parinae         | Parus        | rufescens      | Unknown       | Nearctic  | Resident    |         | 7 (221)      |
| Paridae      | Parinae         | Parus        | rufonuchalis   | Pair          | Paleartic | Resident    |         | 5 (221)      |
| Paridae      | Parinae         | Parus        | rubdiventris   | Pair          | Paleartic | Resident    |         | 2 (221)      |
| Paridae      | Parinae         | Parus        | melanolophus   | Pair          | Paleartic | Altitudinal |         | 5 (221)      |
| Paridae      | Parinae         | Parus        | ater           | Pair          | Paleartic | Resident    |         | 9 (105)      |
| Paridae      | Parinae         | Parus        | venustus       | Unknown       | Paleartic | Resident    |         | 6 (221)      |
| Paridae      | Parinae         | Parus        | elegans        | Unknown       | se Asia   | Resident    |         | (221)        |
| Paridae      | Parinae         | Parus        | amabilis       | Unknown       | se Asia   | Resident    |         | (221)        |
| Paridae      | Parinae         | Parus        | cristatus      | Pair          | Paleartic | Resident    |         | 6 (105)      |
| Paridae      | Parinae         | Parus        | dichrous       | Pair          | Paleartic | Resident    |         | 4 (221)      |
| Paridae      | Parinae         | Parus        | guineensis     | Unknown       | Africa    | Resident    |         | (221)        |
| Paridae      | Parinae         | Parus        | leucomelas     | Unknown       | Africa    | Resident    |         | 4 (221)      |
| Paridae      | Parinae         | Parus        | niger          | Cooperation   | Africa    | Resident    |         | 4 (174)      |
| Paridae      | Parinae         | Parus        | albiventris    | Unknown       | Africa    | Resident    |         | 4 (174)      |
| Paridae      | Parinae         | Parus        | leuconotus     | Unknown       | Africa    | Resident    |         | (174)        |
| Paridae      | Parinae         | Parus        | funereus       | Unknown       | Africa    | Resident    |         | 3 (174)      |
| Paridae      | Parinae         | Parus        | rufiventris    | Suspected     | Africa    | Resident    |         | 3 (174)      |
| Paridae      | Parinae         | Parus        | pallidiventris | Unknown       | Africa    | Resident    |         | (174)        |
| Paridae      | Parinae         | Parus        | fringillinus   | Unknown       | Africa    | Resident    |         | 3 (174)      |
| Paridae      | Parinae         | Parus        | fasciiventer   | Suspected     | Africa    | Resident    |         | (174)        |
| Paridae      | Parinae         | Parus        | thruppi        | Unknown       | Africa    | Resident    |         | (174)        |
| Paridae      | Parinae         | Parus        | griseiventris  | Unknown       | Africa    | Resident    |         | 4 (174)      |
| Paridae      | Parinae         | Parus        | cinerascens    | Suspected     | Africa    | Resident    |         | 4 (174)      |
| Paridae      | Parinae         | Parus        | afer           | Suspected     | Africa    | Resident    |         | 3 (174)      |
| Paridae      | Parinae         | Parus        | major          | Pair          | Paleartic | Partial     |         | 8 (105)      |
| Paridae      | Parinae         | Parus        | bokharensis    | Pair          | Paleartic | Partial     |         | (221)        |
| Paridae      | Parinae         | Parus        | monticolus     | Pair          | Paleartic | Altitudinal |         | 6 (221)      |
| Paridae      | Parinae         | Parus        | nuchalis       | Pair          | Paleartic | Resident    |         | (221)        |
| Paridae      | Parinae         | Parus        | xanthogenys    | Pair          | se Asia   | Resident    |         | 4 (221)      |
| Paridae      | Parinae         | Parus        | spilonotus     | Unknown       | se Asia   | Resident    |         | 5 (221)      |
| Paridae      | Parinae         | Parus        | holsti         | Unknown       | Paleartic | Resident    |         | (221)        |
| Paridae      | Parinae         | Parus        | caeruleus      | Occasional    | Paleartic | Resident    |         | 10 (105)     |
| Paridae      | Parinae         | Parus        | cyanus         | Pair          | Paleartic | Resident    |         | 9 (105)      |
| Paridae      | Parinae         | Parus        | flavipectus    | Pair          | Paleartic | Resident    |         | 7 (221)      |
| Paridae      | Parinae         | Parus        | varius         | Pair          | Paleartic | Resident    |         | 6 (221)      |
| Paridae      | Parinae         | Parus        | semilavatus    | Unknown       | se Asia   | Resident    |         | (221)        |
| Paridae      | Parinae         | Parus        | wollweberi     | Cooperation   | America   | Resident    |         | (76, 364)    |
| Paridae      | Parinae         | Parus        | inornatus      | Pair          | Nearctic  | Resident    |         | 7 (79)       |
| Paridae      | Parinae         | Parus        | bicolor        | Cooperation   | Nearctic  | Resident    |         | 6 (205)      |
| Paridae      | Parinae         | Parus        | atricristatus  | Pair          | Nearctic  | Resident    |         | 6 (221)      |
| Paridae      | Parinae         | Sylviparus   | modestus       | Unknown       | Paleartic | Resident    |         | 5 (221)      |
| Paridae      | Parinae         | Melanochlora | sultanea       | Unknown       | se Asia   | Resident    |         | 6 (221)      |
| Regulidae    | Regulidae       | Regulus      | calendula      | Pair          | Nearctic  | Migration   |         | 7 (250)      |
| Regulidae    | Regulidae       | Regulus      | regulus        | Pair          | Paleartic | Partial     |         | 10 (104)     |
| Regulidae    | Regulidae       | Regulus      | teneriffae     | Pair          | Paleartic | Resident    | Endemic | (302)        |
| Regulidae    | Regulidae       | Regulus      | goodfellowi    | Pair          | Paleartic | Resident    |         | (320)        |
| Regulidae    | Regulidae       | Regulus      | ignicapillus   | Pair          | Paleartic | Partial     |         | 9 (104)      |
| Regulidae    | Regulidae       | Regulus      | satrapa        | Pair          | Nearctic  | Migration   |         | 9 (249)      |
| Fringillidae | Peucedraminae   | Peucedramus  | taeniatus      | Pair          | Nearctic  | Partial     |         | 4 (312)      |
| Fringillidae | Fringillini     | Fringilla    | coelebs        | Pair          | Paleartic | Partial     |         | 4 (106)      |
| Fringillidae | Fringillini     | Fringilla    | teydea         | Unknown       | Paleartic | Resident    | Endemic | 2 (106)      |
| Fringillidae | Fringillini     | Fringilla    | montifringilla | Pair          | Paleartic | Migration   |         | 6 (106, 300) |
| Fringillidae | Carduelini      | Serinus      | pusillus       | Pair          | Paleartic | Altitudinal |         | 4 (106)      |
| Fringillidae | Carduelini      | Serinus      | serinus        | Pair          | Paleartic | Partial     |         | 4 (106)      |
| Fringillidae | Carduelini      | Serinus      | syriacus       | Pair          | Paleartic | Partial     |         | 4 (106)      |

| Family       | Clade Reference | Genus           | species        | Parental care | Region      | Movement    | Island  | Clutch      |
|--------------|-----------------|-----------------|----------------|---------------|-------------|-------------|---------|-------------|
| Fringillidae | Carduelini      | Serinus         | canaria        | Pair          | Palaearctic | Resident    | Endemic | 4 (106)     |
| Fringillidae | Carduelini      | Serinus         | citrinella     | Pair          | Palaearctic | Altitudinal |         | 4 (106)     |
| Fringillidae | Carduelini      | Serinus         | thibetanus     | Unknown       | Palaearctic | Altitudinal |         | (84)        |
| Fringillidae | Carduelini      | Serinus         | canicollis     | Pair          | Africa      | Resident    |         | 3 (324)     |
| Fringillidae | Carduelini      | Serinus         | nigriceps      | Unknown       | Africa      | Resident    |         | (84)        |
| Fringillidae | Carduelini      | Serinus         | citrinelloides | Unknown       | Africa      | Resident    |         | (84)        |
| Fringillidae | Carduelini      | Serinus         | frontalis      | Unknown       | Africa      | Resident    |         | (84)        |
| Fringillidae | Carduelini      | Serinus         | hypostictus    | Unknown       | Africa      | Resident    |         | (84)        |
| Fringillidae | Carduelini      | Serinus         | capistratus    | Unknown       | Africa      | Resident    |         | (84)        |
| Fringillidae | Carduelini      | Serinus         | koliensis      | Unknown       | Africa      | Resident    |         | (84)        |
| Fringillidae | Carduelini      | Serinus         | scotops        | Unknown       | Africa      | Nomadic     |         | 3 (324)     |
| Fringillidae | Carduelini      | Serinus         | leucopygius    | Pair          | Africa      | Resident    |         | (84)        |
| Fringillidae | Carduelini      | Serinus         | rothschildi    | Unknown       | Palaearctic | Resident    |         | (84)        |
| Fringillidae | Carduelini      | Serinus         | flavigula      | Unknown       | Africa      | Nomadic     |         | (21, 46)    |
| Fringillidae | Carduelini      | Serinus         | xanthopygius   | Unknown       | Africa      | Nomadic     |         | (84)        |
| Fringillidae | Carduelini      | Serinus         | reichenowi     | Unknown       | Africa      | Nomadic     |         | (84)        |
| Fringillidae | Carduelini      | Serinus         | atrogularis    | Pair          | Africa      | Nomadic     |         | 3 (324)     |
| Fringillidae | Carduelini      | Serinus         | citrinipectus  | Unknown       | Africa      | Nomadic     |         | 3 (324)     |
| Fringillidae | Carduelini      | Serinus         | mozambicus     | Pair          | Africa      | Resident    |         | 3 (324)     |
| Fringillidae | Carduelini      | Serinus         | donaldsoni     | Pair          | Africa      | Nomadic     |         | (84)        |
| Fringillidae | Carduelini      | Serinus         | buchanani      | Unknown       | Africa      | Nomadic     |         | (84)        |
| Fringillidae | Carduelini      | Serinus         | dorsostriatus  | Pair          | Africa      | Resident    |         | (84)        |
| Fringillidae | Carduelini      | Serinus         | flaviventris   | Pair          | Africa      | Nomadic     |         | 3 (324)     |
| Fringillidae | Carduelini      | Serinus         | sulphuratus    | Pair          | Africa      | Nomadic     |         | 3 (324)     |
| Fringillidae | Carduelini      | Serinus         | albugularis    | Pair          | Africa      | Nomadic     |         | 3 (324)     |
| Fringillidae | Carduelini      | Serinus         | canicapillus   | Unknown       | Africa      | Nomadic     |         | (324)       |
| Fringillidae | Carduelini      | Serinus         | reichardi      | Unknown       | Africa      | Nomadic     |         | (324)       |
| Fringillidae | Carduelini      | Serinus         | gularis        | Pair          | Africa      | Nomadic     |         | 3 (324)     |
| Fringillidae | Carduelini      | Serinus         | mennelli       | Unknown       | Africa      | Nomadic     |         | 3 (324)     |
| Fringillidae | Carduelini      | Serinus         | tristriatus    | Pair          | Africa      | Resident    |         | (84)        |
| Fringillidae | Carduelini      | Serinus         | menachensis    | Pair          | Palaearctic | Resident    |         | (84)        |
| Fringillidae | Carduelini      | Serinus         | ankoberensis   | Unknown       | Africa      | Nomadic     |         | 3 (46)      |
| Fringillidae | Carduelini      | Serinus         | striolatus     | Unknown       | Africa      | Nomadic     |         | (84)        |
| Fringillidae | Carduelini      | Serinus         | whytii         | Unknown       | Africa      | Nomadic     |         | (84)        |
| Fringillidae | Carduelini      | Serinus         | burtoni        | Unknown       | Africa      | Resident    |         | (84)        |
| Fringillidae | Carduelini      | Serinus         | rufobrunneus   | Unknown       | Africa      | Resident    | Endemic | (84)        |
| Fringillidae | Carduelini      | Serinus         | melanochrous   | Unknown       | Africa      | Resident    |         | (84)        |
| Fringillidae | Carduelini      | Serinus         | leucopterus    | Pair          | Africa      | Resident    |         | 3 (324)     |
| Fringillidae | Carduelini      | Serinus         | totta          | Pair          | Africa      | Altitudinal |         | 4 (324)     |
| Fringillidae | Carduelini      | Serinus         | symonsi        | Unknown       | Africa      | Altitudinal |         | 3 (324)     |
| Fringillidae | Carduelini      | Serinus         | leucolaema     | Unknown       | Africa      | Nomadic     |         | (324)       |
| Fringillidae | Carduelini      | Serinus         | alario         | Unknown       | Africa      | Nomadic     |         | 3 (324)     |
| Fringillidae | Carduelini      | Serinus         | estherae       | Unknown       | se Asia     | Resident    |         | (271)       |
| Fringillidae | Carduelini      | Neospiza        | concolor       | Unknown       | Africa      | Resident    | Endemic | (46)        |
| Fringillidae | Carduelini      | Linurgus        | olivaceus      | Unknown       | Africa      | Resident    |         | (84)        |
| Fringillidae | Carduelini      | Rhynchostruthus | socotranus     | Pair          | Africa      | Nomadic     |         | (173)       |
| Fringillidae | Carduelini      | Carduelis       | chloris        | Pair          | Palaearctic | Partial     |         | 5 (106)     |
| Fringillidae | Carduelini      | Carduelis       | sinica         | Pair          | Palaearctic | Partial     |         | 4 (52, 354) |
| Fringillidae | Carduelini      | Carduelis       | spinoides      | Pair          | Palaearctic | Altitudinal |         | 4 (84)      |
| Fringillidae | Carduelini      | Carduelis       | ambigua        | Unknown       | Palaearctic | Partial     |         | (84)        |
| Fringillidae | Carduelini      | Carduelis       | monguilloti    | Unknown       | se Asia     | Resident    |         | (84)        |
| Fringillidae | Carduelini      | Carduelis       | pinus          | Pair          | Palaearctic | Migration   |         | 4 (106)     |
| Fringillidae | Carduelini      | Carduelis       | pinus          | Pair          | Palaearctic | Migration   |         | 4 (116)     |
| Fringillidae | Carduelini      | Carduelis       | atriceps       | Unknown       | America     | Resident    |         | (84)        |
| Fringillidae | Carduelini      | Carduelis       | spinescens     | Unknown       | America     | Nomadic     |         | (234)       |
| Fringillidae | Carduelini      | Carduelis       | yarellii       | Unknown       | America     | Resident    |         | (93)        |
| Fringillidae | Carduelini      | Carduelis       | cucullata      | Pair          | America     | Nomadic     |         | (93)        |
| Fringillidae | Carduelini      | Carduelis       | crassirostris  | Unknown       | America     | Partial     |         | (156)       |
| Fringillidae | Carduelini      | Carduelis       | magellanica    | Unknown       | America     | Nomadic     |         | (234)       |
| Fringillidae | Carduelini      | Carduelis       | siemiradzki    | Unknown       | America     | Resident    |         | (93)        |
| Fringillidae | Carduelini      | Carduelis       | olivacea       | Unknown       | America     | Resident    |         | (84)        |
| Fringillidae | Carduelini      | Carduelis       | notata         | Unknown       | America     | Partial     |         | (84)        |
| Fringillidae | Carduelini      | Carduelis       | barbata        | Unknown       | America     | Resident    |         | (156)       |
| Fringillidae | Carduelini      | Carduelis       | xanthogastra   | Unknown       | America     | Resident    |         | 2 (466)     |
| Fringillidae | Carduelini      | Carduelis       | atrata         | Unknown       | America     | Resident    |         | (156)       |
| Fringillidae | Carduelini      | Carduelis       | uropygialis    | Unknown       | America     | Partial     |         | (156)       |
| Fringillidae | Carduelini      | Carduelis       | tristis        | Pair          | Nearctic    | Partial     |         | 5 (338)     |
| Fringillidae | Carduelini      | Carduelis       | psaltria       | Pair          | America     | Resident    |         | 4 (509)     |
| Fringillidae | Carduelini      | Carduelis       | lawrencei      | Occasional    | Nearctic    | Migration   |         | 5 (115)     |
| Fringillidae | Carduelini      | Carduelis       | dominicensis   | Unknown       | America     | Nomadic     | Endemic | (84)        |
| Fringillidae | Carduelini      | Carduelis       | carduelis      | Pair          | Palaearctic | Partial     |         | 5 (106)     |
| Fringillidae | Carduelini      | Carduelis       | hornemanni     | Occasional    | Holarctic   | Partial     |         | 5 (106)     |
| Fringillidae | Carduelini      | Carduelis       | flammea        | Occasional    | Holarctic   | Migration   |         | 5 (106)     |

| Family       | Clade Reference | Genus           | species        | Parental care | Region     | Movement    | Island  | Clutch    |
|--------------|-----------------|-----------------|----------------|---------------|------------|-------------|---------|-----------|
| Fringillidae | Carduelini      | Carduelis       | flavirostris   | Pair          | Palearctic | Partial     |         | 6 (106)   |
| Fringillidae | Carduelini      | Carduelis       | cannabina      | Pair          | Palearctic | Partial     |         | 5 (106)   |
| Fringillidae | Carduelini      | Carduelis       | yemenensis     | Pair          | Palearctic | Nomadic     |         | (84)      |
| Fringillidae | Carduelini      | Carduelis       | johannis       | Unknown       | Africa     | Nomadic     |         | (46)      |
| Fringillidae | Carduelini      | Leucosticte     | nemicola       | Unknown       | Palearctic | Altitudinal |         | 3 (84)    |
| Fringillidae | Carduelini      | Leucosticte     | brandti        | Pair          | Palearctic | Altitudinal |         | 3 (84)    |
| Fringillidae | Carduelini      | Leucosticte     | arctoa         | Pair          | Palearctic | Partial     |         | (84)      |
| Fringillidae | Carduelini      | Leucosticte     | tephrocotis    | Pair          | Nearctic   | Migration   |         | 4 (317)   |
| Fringillidae | Carduelini      | Leucosticte     | atrata         | Unknown       | Nearctic   | Migration   |         | (84)      |
| Fringillidae | Carduelini      | Leucosticte     | australis      | Pair          | Nearctic   | Migration   |         | 4 (263)   |
| Fringillidae | Carduelini      | Callacanthis    | burtoni        | Pair          | Palearctic | Altitudinal |         | 3 (84)    |
| Fringillidae | Carduelini      | Rhodopechys     | sanguinea      | Pair          | Palearctic | Altitudinal |         | 5 (106)   |
| Fringillidae | Carduelini      | Rhodopechys     | githaginea     | Pair          | Palearctic | Nomadic     |         | 5 (106)   |
| Fringillidae | Carduelini      | Rhodopechys     | mongolica      | Pair          | Palearctic | Partial     |         | 5 (106)   |
| Fringillidae | Carduelini      | Rhodopechys     | obsoleta       | Pair          | Palearctic | Resident    |         | 5 (106)   |
| Fringillidae | Carduelini      | Uragus          | sibiricus      | Pair          | Palearctic | Partial     |         | (84)      |
| Fringillidae | Carduelini      | Carpodacus      | rubescens      | Unknown       | Palearctic | Altitudinal |         | (84)      |
| Fringillidae | Carduelini      | Carpodacus      | nipalensis     | Unknown       | Palearctic | Altitudinal |         | (84)      |
| Fringillidae | Carduelini      | Carpodacus      | purpureus      | Pair          | Nearctic   | Partial     |         | (533)     |
| Fringillidae | Carduelini      | Carpodacus      | erythrurus     | Occasional    | Palearctic | Partial     |         | 5 (106)   |
| Fringillidae | Carduelini      | Carpodacus      | cassini        | Pair          | Nearctic   | Migration   |         | 4 (209)   |
| Fringillidae | Carduelini      | Carpodacus      | mexicanus      | Pair          | Nearctic   | Partial     |         | 4 (232)   |
| Fringillidae | Carduelini      | Carpodacus      | pulcherrimus   | Unknown       | Palearctic | Altitudinal |         | 4 (84)    |
| Fringillidae | Carduelini      | Carpodacus      | eos            | Unknown       | Palearctic | Altitudinal |         | (84)      |
| Fringillidae | Carduelini      | Carpodacus      | rodochrous     | Pair          | Palearctic | Altitudinal |         | 5 (84)    |
| Fringillidae | Carduelini      | Carpodacus      | vinaceus       | Pair          | Palearctic | Altitudinal |         | (84)      |
| Fringillidae | Carduelini      | Carpodacus      | edwardsii      | Unknown       | Palearctic | Altitudinal |         | (84)      |
| Fringillidae | Carduelini      | Carpodacus      | synoicus       | Unknown       | Palearctic | Partial     |         | 4 (106)   |
| Fringillidae | Carduelini      | Carpodacus      | roseus         | Unknown       | Palearctic | Migration   |         | (84)      |
| Fringillidae | Carduelini      | Carpodacus      | trifasciatus   | Unknown       | Palearctic | Altitudinal |         | (84)      |
| Fringillidae | Carduelini      | Carpodacus      | rodopeplus     | Unknown       | Palearctic | Altitudinal |         | (84)      |
| Fringillidae | Carduelini      | Carpodacus      | thura          | Pair          | Palearctic | Altitudinal |         | 3 (84)    |
| Fringillidae | Carduelini      | Carpodacus      | rhodochlamys   | Unknown       | Palearctic | Altitudinal |         | (84)      |
| Fringillidae | Carduelini      | Carpodacus      | rubicilloides  | Unknown       | Palearctic | Altitudinal |         | 4 (84)    |
| Fringillidae | Carduelini      | Carpodacus      | rubicilla      | Pair          | Palearctic | Altitudinal |         | 5 (106)   |
| Fringillidae | Carduelini      | Carpodacus      | puniceus       | Unknown       | Palearctic | Altitudinal |         | (106)     |
| Fringillidae | Carduelini      | Carpodacus      | carborowskii   | Unknown       | Palearctic | Resident    |         | (106)     |
| Fringillidae | Carduelini      | Chaunoproctus   | ferreorostris  | Unknown       | Palearctic | Resident    | Endemic | (350)     |
| Fringillidae | Carduelini      | Pinicola        | enucleator     | Pair          | Holarctic  | Partial     |         | 4 (106)   |
| Fringillidae | Carduelini      | Pinicola        | subhimachalus  | Unknown       | Palearctic | Altitudinal |         | (84)      |
| Fringillidae | Carduelini      | Haematospiza    | sipahi         | Unknown       | Palearctic | Altitudinal |         | 4 (84)    |
| Fringillidae | Carduelini      | Loxia           | pytropsittacus | Pair          | Palearctic | Nomadic     |         | 4 (106)   |
| Fringillidae | Carduelini      | Loxia           | scotica        | Occasional    | Palearctic | Nomadic     |         | 4 (361)   |
| Fringillidae | Carduelini      | Loxia           | curvirostra    | Occasional    | Holarctic  | Nomadic     |         | 4 (106)   |
| Fringillidae | Carduelini      | Loxia           | leucoptera     | Pair          | Palearctic | Nomadic     |         | 4 (106)   |
| Fringillidae | Carduelini      | Pyrrhula        | nipalensis     | Unknown       | se Asia    | Resident    |         | (84)      |
| Fringillidae | Carduelini      | Pyrrhula        | leucogenis     | Unknown       | se Asia    | Altitudinal |         | (271)     |
| Fringillidae | Carduelini      | Pyrrhula        | aurantiaca     | Unknown       | Palearctic | Altitudinal |         | 3 (84)    |
| Fringillidae | Carduelini      | Pyrrhula        | erythrocephala | Unknown       | Palearctic | Altitudinal |         | 3 (84)    |
| Fringillidae | Carduelini      | Pyrrhula        | erythaca       | Pair          | Palearctic | Altitudinal |         | (84)      |
| Fringillidae | Carduelini      | Pyrrhula        | pyrrhula       | Pair          | Palearctic | Partial     |         | 5 (106)   |
| Fringillidae | Carduelini      | Coccothraustes  | coccothraustes | Pair          | Palearctic | Partial     |         | 5 (106)   |
| Fringillidae | Carduelini      | Eophona         | migratoria     | Pair          | Palearctic | Partial     |         | (84)      |
| Fringillidae | Carduelini      | Eophona         | personata      | Pair          | Palearctic | Partial     |         | 3 (84)    |
| Fringillidae | Carduelini      | Mycerobas       | icterioides    | Pair          | Palearctic | Altitudinal |         | 2 (84)    |
| Fringillidae | Carduelini      | Mycerobas       | affinis        | Unknown       | Palearctic | Altitudinal |         | (84)      |
| Fringillidae | Carduelini      | Mycerobas       | melanozanthos  | Unknown       | Palearctic | Altitudinal |         | 2 (84)    |
| Fringillidae | Carduelini      | Mycerobas       | carnipes       | Pair          | Palearctic | Altitudinal |         | 3 (84)    |
| Fringillidae | Carduelini      | Hesperiphona    | vespertina     | Occasional    | Nearctic   | Migration   |         | (189)     |
| Fringillidae | Carduelini      | Hesperiphona    | abeillei       | Pair          | Nearctic   | Resident    |         | (84)      |
| Fringillidae | Carduelini      | Pyrrhoplectes   | epauletta      | Unknown       | Palearctic | Altitudinal |         | (84)      |
| Fringillidae | Drepanidini     | Telespiza       | ultima         | Unknown       | America    | Resident    | Endemic | no source |
| Fringillidae | Drepanidini     | Telespiza       | cantans        | Pair          | America    | Resident    | Endemic | 3 (348)   |
| Fringillidae | Drepanidini     | Psittirostra    | psittacea      | Unknown       | America    | Resident    | Endemic | (460)     |
| Fringillidae | Drepanidini     | Dysmorodrepanis | munroi         | Unknown       | America    | Resident    | Endemic | (460)     |
| Fringillidae | Drepanidini     | Loxioides       | baillieui      | Pair          | America    | Resident    | Endemic | (157)     |
| Fringillidae | Drepanidini     | Rhodacanthis    | flaviceps      | Unknown       | America    | Resident    | Endemic | (377)     |
| Fringillidae | Drepanidini     | Rhodacanthis    | palmeri        | Unknown       | America    | Resident    | Endemic | (377)     |
| Fringillidae | Drepanidini     | Chloridops      | kona           | Unknown       | America    | Resident    | Endemic | (377)     |
| Fringillidae | Drepanidini     | Pseudonestor    | xanthophrys    | Pair          | America    | Resident    | Endemic | 1 (451)   |
| Fringillidae | Drepanidini     | Viridonia       | stejnegeri     | Unknown       | America    | Resident    | Endemic | 3 (299)   |
| Fringillidae | Drepanidini     | Viridonia       | virens         | Occasional    | America    | Resident    | Endemic | 2 (299)   |
| Fringillidae | Drepanidini     | Viridonia       | parva          | Pair          | America    | Resident    | Endemic | 3 (292)   |

| Family       | Clade Reference | Genus         | species         | Parental care | Region    | Movement    | Island    | Clutch     |
|--------------|-----------------|---------------|-----------------|---------------|-----------|-------------|-----------|------------|
| Fringillidae | Drepanidini     | Viridonia     | sagittirostris  | Unknown       | America   | Resident    | Endemic   | (299)      |
| Fringillidae | Drepanidini     | Hemignathus   | obscurus        | Unknown       | America   | Resident    | Endemic   | (294)      |
| Fringillidae | Drepanidini     | Hemignathus   | lucidus         | Unknown       | America   | Resident    | Endemic   | (396)      |
| Fringillidae | Drepanidini     | Hemignathus   | wilsoni         | Unknown       | America   | Resident    | Endemic   | (396)      |
| Fringillidae | Drepanidini     | Oreomystis    | bairdi          | Suspected     | America   | Resident    | Endemic   | (161)      |
| Fringillidae | Drepanidini     | Oreomystis    | mana            | Pair          | America   | Resident    | Endemic 2 | (500, 531) |
| Fringillidae | Drepanidini     | Paroreomyza   | montana         | Cooperation   | America   | Resident    | Endemic 2 | (29)       |
| Fringillidae | Drepanidini     | Paroreomyza   | flammea         | Unknown       | America   | Resident    | Endemic   | (28)       |
| Fringillidae | Drepanidini     | Paroreomyza   | maculata        | Unknown       | America   | Resident    | Endemic   | (28)       |
| Fringillidae | Drepanidini     | Loxops        | caeruleirostris | Unknown       | America   | Resident    | Endemic 2 | (295)      |
| Fringillidae | Drepanidini     | Loxops        | coccineus       | Pair          | America   | Resident    | Endemic 2 | (293)      |
| Fringillidae | Drepanidini     | Ciridops      | anna            | Unknown       | America   | Resident    | Endemic   | (46)       |
| Fringillidae | Drepanidini     | Vestiaria     | coccinea        | Pair          | America   | Nomadic     | Endemic 2 | (148)      |
| Fringillidae | Drepanidini     | Drepanis      | pacifica        | Unknown       | America   | Resident    | Endemic   | (46)       |
| Fringillidae | Drepanidini     | Drepanis      | funerea         | Unknown       | America   | Resident    | Endemic   | (46)       |
| Fringillidae | Drepanidini     | Palmeria      | dolei           | Unknown       | America   | Resident    | Endemic 2 | (44)       |
| Fringillidae | Drepanidini     | Himatione     | sanguinea       | Pair          | America   | Resident    | Endemic 3 | (147)      |
| Fringillidae | Drepanidini     | Melamprosops  | phaeosoma       | Unknown       | America   | Resident    | Endemic 3 | (397)      |
| Fringillidae | Emberizini      | Urocynchramus | pylzowi         | Unknown       | Paleartic | Resident    |           | (204, 320) |
| Fringillidae | Emberizini      | Melophus      | lathamii        | Pair          | Paleartic | Resident    | 4         | (64)       |
| Fringillidae | Emberizini      | Latoucheornis | siemsseni       | Unknown       | Paleartic | Migration   |           | (64)       |
| Fringillidae | Emberizini      | Emberiza      | citrinella      | Pair          | Paleartic | Partial     | 4         | (107)      |
| Fringillidae | Emberizini      | Emberiza      | leucocephalos   | Pair          | Paleartic | Migration   | 5         | (107)      |
| Fringillidae | Emberizini      | Emberiza      | stewarti        | Unknown       | Paleartic | Migration   | 4         | (64)       |
| Fringillidae | Emberizini      | Emberiza      | cirlus          | Pair          | Paleartic | Resident    | 4         | (107)      |
| Fringillidae | Emberizini      | Emberiza      | koslowi         | Unknown       | Paleartic | Resident    |           | (64)       |
| Fringillidae | Emberizini      | Emberiza      | cia             | Pair          | Paleartic | Altitudinal | 4         | (107)      |
| Fringillidae | Emberizini      | Emberiza      | godlewskii      | Pair          | Paleartic | Partial     | 4         | (64)       |
| Fringillidae | Emberizini      | Emberiza      | cioides         | Pair          | Paleartic | Resident    | 4         | (64)       |
| Fringillidae | Emberizini      | Emberiza      | jankowskii      | Pair          | Paleartic | Resident    | 4         | (92)       |
| Fringillidae | Emberizini      | Emberiza      | buchanani       | Pair          | Paleartic | Migration   | 5         | (107)      |
| Fringillidae | Emberizini      | Emberiza      | cineracea       | Unknown       | Paleartic | Migration   | 5         | (107)      |
| Fringillidae | Emberizini      | Emberiza      | hortulana       | Pair          | Paleartic | Migration   | 5         | (107)      |
| Fringillidae | Emberizini      | Emberiza      | caesia          | Pair          | Paleartic | Migration   | 4         | (107)      |
| Fringillidae | Emberizini      | Emberiza      | striolata       | Pair          | Paleartic | Resident    | 3         | (107)      |
| Fringillidae | Emberizini      | Emberiza      | impetuani       | Pair          | Africa    | Nomadic     | 3         | (324)      |
| Fringillidae | Emberizini      | Emberiza      | tahapisi        | Pair          | Africa    | Nomadic     | 3         | (324)      |
| Fringillidae | Emberizini      | Emberiza      | socotrana       | Unknown       | Africa    | Resident    | Endemic   | (64)       |
| Fringillidae | Emberizini      | Emberiza      | capensis        | Pair          | Africa    | Resident    | 3         | (324)      |
| Fringillidae | Emberizini      | Emberiza      | tristrami       | Unknown       | Paleartic | Migration   | 4         | (64)       |
| Fringillidae | Emberizini      | Emberiza      | fucata          | Suspected     | Paleartic | Migration   | 4         | (62)       |
| Fringillidae | Emberizini      | Emberiza      | pusilla         | Pair          | Paleartic | Migration   | 5         | (107)      |
| Fringillidae | Emberizini      | Emberiza      | chrysophrys     | Pair          | Paleartic | Migration   | 4         | (64)       |
| Fringillidae | Emberizini      | Emberiza      | rustica         | Pair          | Paleartic | Migration   | 4         | (107)      |
| Fringillidae | Emberizini      | Emberiza      | elegans         | Unknown       | Paleartic | Migration   | 5         | (64)       |
| Fringillidae | Emberizini      | Emberiza      | aureola         | Pair          | Paleartic | Migration   | 5         | (107)      |
| Fringillidae | Emberizini      | Emberiza      | rutila          | Pair          | Paleartic | Migration   | 4         | (64)       |
| Fringillidae | Emberizini      | Emberiza      | flaviventris    | Pair          | Africa    | Resident    | 2         | (324)      |
| Fringillidae | Emberizini      | Emberiza      | poliopleura     | Pair          | Africa    | Resident    | 2         | (64)       |
| Fringillidae | Emberizini      | Emberiza      | affinis         | Unknown       | Africa    | Resident    |           | (64)       |
| Fringillidae | Emberizini      | Emberiza      | cabanisi        | Unknown       | Africa    | Resident    | 2         | (324)      |
| Fringillidae | Emberizini      | Emberiza      | melanocephala   | Uniparental   | Paleartic | Migration   | 4         | (107)      |
| Fringillidae | Emberizini      | Emberiza      | bruniceps       | Uniparental   | Paleartic | Migration   | 4         | (107)      |
| Fringillidae | Emberizini      | Emberiza      | sulphurata      | Pair          | Paleartic | Migration   | 3         | (64)       |
| Fringillidae | Emberizini      | Emberiza      | spodocephala    | Pair          | Paleartic | Migration   | 4         | (64)       |
| Fringillidae | Emberizini      | Emberiza      | variabilis      | Pair          | Paleartic | Migration   | 4         | (64)       |
| Fringillidae | Emberizini      | Emberiza      | pallasi         | Pair          | Paleartic | Migration   | 5         | (107)      |
| Fringillidae | Emberizini      | Emberiza      | schoeniclus     | Pair          | Paleartic | Partial     | 5         | (107)      |
| Fringillidae | Emberizini      | Emberiza      | yessoensis      | Pair          | Paleartic | Migration   | 4         | (107)      |
| Fringillidae | Emberizini      | Miliaria      | calandra        | Cooperation   | Paleartic | Partial     | 5         | (107)      |
| Fringillidae | Emberizini      | Calcarius     | mccownii        | Pair          | Nearctic  | Migration   | 3         | (522)      |
| Fringillidae | Emberizini      | Calcarius     | lapponicus      | Suspected     | Holarctic | Partial     | 6         | (107)      |
| Fringillidae | Emberizini      | Calcarius     | pictus          | Cooperation   | Nearctic  | Migration   | 4         | (55)       |
| Fringillidae | Emberizini      | Calcarius     | ornatus         | Pair          | Nearctic  | Migration   | 4         | (231)      |
| Fringillidae | Emberizini      | Plectrophenax | nivalis         | Pair          | Holarctic | Migration   | 6         | (107)      |
| Fringillidae | Emberizini      | Plectrophenax | hyperboreus     | Unknown       | Nearctic  | Migration   | 5         | (315)      |
| Fringillidae | Emberizini      | Calamospiza   | melanocorys     | Cooperation   | Nearctic  | Migration   | 4         | (445)      |
| Fringillidae | Emberizini      | Passerella    | iliaca          | Pair          | Nearctic  | Migration   | 4         | (64)       |
| Fringillidae | Emberizini      | Melospiza     | melodia         | Pair          | Nearctic  | Migration   | 4         | (64)       |
| Fringillidae | Emberizini      | Melospiza     | lincolnii       | Pair          | Nearctic  | Migration   | 4         | (13)       |
| Fringillidae | Emberizini      | Melospiza     | georgiana       | Pair          | Nearctic  | Migration   | 4         | (351)      |
| Fringillidae | Emberizini      | Zonotrichia   | capensis        | Pair          | America   | Partial     | 3         | (64)       |
| Fringillidae | Emberizini      | Zonotrichia   | querula         | Pair          | Nearctic  | Migration   | 4         | (367)      |

| Family       | Clade Reference | Genus       | species          | Parental care | Region   | Movement  | Island  | Clutch       |
|--------------|-----------------|-------------|------------------|---------------|----------|-----------|---------|--------------|
| Fringillidae | Emberizini      | Zonotrichia | albicollis       | Pair          | Nearctic | Migration |         | 4 (146)      |
| Fringillidae | Emberizini      | Zonotrichia | leucophrys       | Pair          | Nearctic | Partial   |         | 5 (74)       |
| Fringillidae | Emberizini      | Zonotrichia | atricapilla      | Pair          | Nearctic | Migration |         | 4 (366)      |
| Fringillidae | Emberizini      | Junco       | vulcani          | Pair          | America  | Resident  |         | 2 (466)      |
| Fringillidae | Emberizini      | Junco       | hyemalis         | Pair          | Nearctic | Partial   |         | 5 (64)       |
| Fringillidae | Emberizini      | Junco       | insularis        | Unknown       | Nearctic | Resident  | Endemic | 3 (64)       |
| Fringillidae | Emberizini      | Junco       | phaeonorotus     | Occasional    | Nearctic | Resident  |         | 4 (474)      |
| Fringillidae | Emberizini      | Passerculus | sandwichensis    | Pair          | Nearctic | Migration |         | 4 (516)      |
| Fringillidae | Emberizini      | Passerculus | rostratus        | Unknown       | Nearctic | Resident  |         | (64)         |
| Fringillidae | Emberizini      | Ammodramus  | maritimus        | Pair          | Nearctic | Partial   |         | 4 (394)      |
| Fringillidae | Emberizini      | Ammodramus  | caudacutus       | Pair          | Nearctic | Migration |         | 4 (199)      |
| Fringillidae | Emberizini      | Ammodramus  | leconteii        | Pair          | Nearctic | Migration |         | 5 (307)      |
| Fringillidae | Emberizini      | Ammodramus  | henslowii        | Occasional    | Nearctic | Migration |         | 4 (207)      |
| Fringillidae | Emberizini      | Ammodramus  | bairdii          | Pair          | Nearctic | Migration |         | 4 (64)       |
| Fringillidae | Emberizini      | Ammodramus  | savannarum       | Cooperation   | Nearctic | Migration |         | 4 (268, 505) |
| Fringillidae | Emberizini      | Ammodramus  | humeralis        | Unknown       | America  | Resident  |         | 3 (64)       |
| Fringillidae | Emberizini      | Ammodramus  | aurifrons        | Unknown       | America  | Resident  |         | 2 (64)       |
| Fringillidae | Emberizini      | Xenospiza   | baileyi          | Pair          | America  | Resident  |         | (374)        |
| Fringillidae | Emberizini      | Spizella    | arborea          | Pair          | Nearctic | Migration |         | 5 (359)      |
| Fringillidae | Emberizini      | Spizella    | passerina        | Suspected     | Nearctic | Migration |         | 4 (339)      |
| Fringillidae | Emberizini      | Spizella    | pallida          | Pair          | Nearctic | Migration |         | 4 (277)      |
| Fringillidae | Emberizini      | Spizella    | taverneri        | Pair          | Nearctic | Migration |         | 3 (64)       |
| Fringillidae | Emberizini      | Spizella    | breweri          | Occasional    | Nearctic | Migration |         | 3 (188, 427) |
| Fringillidae | Emberizini      | Spizella    | pusilla          | Pair          | Nearctic | Partial   |         | 4 (65)       |
| Fringillidae | Emberizini      | Spizella    | wortheni         | Pair          | America  | Resident  |         | 3 (513)      |
| Fringillidae | Emberizini      | Spizella    | atrogularis      | Pair          | Nearctic | Partial   |         | 4 (481)      |
| Fringillidae | Emberizini      | Poocetes    | gramineus        | Pair          | Nearctic | Migration |         | 4 (64)       |
| Fringillidae | Emberizini      | Chondestes  | grammacus        | Pair          | Nearctic | Partial   |         | 4 (334)      |
| Fringillidae | Emberizini      | Amphispiza  | bilineata        | Unknown       | Nearctic | Partial   |         | 3 (64)       |
| Fringillidae | Emberizini      | Amphispiza  | belli            | Pair          | Nearctic | Migration |         | 4 (333)      |
| Fringillidae | Emberizini      | Aimophila   | quinquestriata   | Pair          | America  | Resident  |         | 3 (202)      |
| Fringillidae | Emberizini      | Aimophila   | mystacalis       | Unknown       | America  | Resident  |         | 3 (64)       |
| Fringillidae | Emberizini      | Aimophila   | humeralis        | Unknown       | America  | Resident  |         | 3 (64)       |
| Fringillidae | Emberizini      | Aimophila   | ruficauda        | Cooperation   | America  | Resident  |         | 2 (64)       |
| Fringillidae | Emberizini      | Aimophila   | sumichrasti      | Unknown       | America  | Resident  |         | (64)         |
| Fringillidae | Emberizini      | Aimophila   | strigiceps       | Unknown       | America  | Resident  |         | 3 (64)       |
| Fringillidae | Emberizini      | Aimophila   | stolzmanni       | Pair          | America  | Resident  |         | 4 (64)       |
| Fringillidae | Emberizini      | Aimophila   | aestivalis       | Pair          | Nearctic | Partial   |         | 4 (131)      |
| Fringillidae | Emberizini      | Aimophila   | botterii         | Pair          | America  | Resident  |         | 3 (510)      |
| Fringillidae | Emberizini      | Aimophila   | cassinii         | Pair          | Nearctic | Resident  |         | 3 (132)      |
| Fringillidae | Emberizini      | Aimophila   | carpalis         | Pair          | Nearctic | Resident  |         | 3 (309)      |
| Fringillidae | Emberizini      | Aimophila   | ruficeps         | Pair          | Nearctic | Resident  |         | 4 (96)       |
| Fringillidae | Emberizini      | Aimophila   | notosticta       | Unknown       | America  | Resident  |         | (64)         |
| Fringillidae | Emberizini      | Aimophila   | rufescens        | Pair          | America  | Resident  |         | 3 (64)       |
| Fringillidae | Emberizini      | Torreornis  | inexpectata      | Unknown       | America  | Resident  |         | 3 (93)       |
| Fringillidae | Emberizini      | Oriturus    | superciliosus    | Pair          | America  | Resident  |         | 3 (64)       |
| Fringillidae | Emberizini      | Pipilo      | chlorurus        | Pair          | Nearctic | Migration |         | 4 (125)      |
| Fringillidae | Emberizini      | Pipilo      | ocai             | Unknown       | America  | Resident  |         | 4 (64)       |
| Fringillidae | Emberizini      | Pipilo      | erythrophthalmus | Pair          | Nearctic | Partial   |         | 4 (197, 198) |
| Fringillidae | Emberizini      | Pipilo      | aberti           | Pair          | Nearctic | Resident  |         | 3 (492)      |
| Fringillidae | Emberizini      | Pipilo      | crissalis        | Pair          | Nearctic | Resident  |         | 3 (64)       |
| Fringillidae | Emberizini      | Pipilo      | fuscus           | Pair          | Nearctic | Resident  |         | 3 (264)      |
| Fringillidae | Emberizini      | Pipilo      | albicollis       | Pair          | America  | Resident  |         | 4 (64)       |
| Fringillidae | Emberizini      | Melozone    | kieneri          | Pair          | America  | Resident  |         | 3 (64)       |
| Fringillidae | Emberizini      | Melozone    | biarcuatum       | Pair          | America  | Resident  |         | 2 (64)       |
| Fringillidae | Emberizini      | Melozone    | leucotis         | Pair          | America  | Resident  |         | 2 (64)       |
| Fringillidae | Emberizini      | Arremon     | aurantiostrius   | Pair          | America  | Resident  |         | 2 (453)      |
| Fringillidae | Emberizini      | Arremon     | schlegeli        | Unknown       | America  | Resident  |         | (494)        |
| Fringillidae | Emberizini      | Arremon     | taciturnus       | Pair          | America  | Resident  |         | 2 (234)      |
| Fringillidae | Emberizini      | Arremon     | abeillei         | Unknown       | America  | Resident  |         | (413)        |
| Fringillidae | Emberizini      | Arremon     | flavirostris     | Pair          | America  | Resident  |         | (335)        |
| Fringillidae | Emberizini      | Arremonops  | rufivirgatus     | Pair          | America  | Resident  |         | 2 (63)       |
| Fringillidae | Emberizini      | Arremonops  | tocuyensis       | Pair          | America  | Resident  |         | 2 (64)       |
| Fringillidae | Emberizini      | Arremonops  | chloronotus      | Pair          | America  | Resident  |         | 3 (64)       |
| Fringillidae | Emberizini      | Arremonops  | conirostris      | Pair          | America  | Resident  |         | 2 (64)       |
| Fringillidae | Emberizini      | Atlapetes   | albinucha        | Unknown       | America  | Resident  |         | 2 (390)      |
| Fringillidae | Emberizini      | Atlapetes   | gutturalis       | Unknown       | America  | Resident  |         | (466)        |
| Fringillidae | Emberizini      | Atlapetes   | pallidinucha     | Unknown       | America  | Resident  |         | (234)        |
| Fringillidae | Emberizini      | Atlapetes   | rufinucha        | Unknown       | America  | Resident  |         | (234)        |
| Fringillidae | Emberizini      | Atlapetes   | leucopis         | Unknown       | America  | Resident  |         | (435)        |
| Fringillidae | Emberizini      | Atlapetes   | pileatus         | Unknown       | America  | Resident  |         | (390)        |
| Fringillidae | Emberizini      | Atlapetes   | melanocephalus   | Unknown       | America  | Resident  |         | (235)        |
| Fringillidae | Emberizini      | Atlapetes   | flaviceps        | Unknown       | America  | Resident  |         | (93)         |

| Family       | Clade Reference | Genus         | species        | Parental care | Region   | Movement  | Island    | Clutch    |
|--------------|-----------------|---------------|----------------|---------------|----------|-----------|-----------|-----------|
| Fringillidae | Emberizini      | Atlapetes     | fuscoolivaceus | Unknown       | America  | Resident  |           | (235)     |
| Fringillidae | Emberizini      | Atlapetes     | tricolor       | Unknown       | America  | Resident  | 1         | (235)     |
| Fringillidae | Emberizini      | Atlapetes     | albofrenatus   | Unknown       | America  | Resident  |           | (234)     |
| Fringillidae | Emberizini      | Atlapetes     | schistaceus    | Unknown       | America  | Resident  |           | (234)     |
| Fringillidae | Emberizini      | Atlapetes     | seebohmi       | Unknown       | America  | Resident  |           | (413)     |
| Fringillidae | Emberizini      | Atlapetes     | nationi        | Unknown       | America  | Resident  |           | (156)     |
| Fringillidae | Emberizini      | Atlapetes     | leucopterus    | Unknown       | America  | Resident  |           | (156)     |
| Fringillidae | Emberizini      | Atlapetes     | albiceps       | Unknown       | America  | Resident  |           | (390)     |
| Fringillidae | Emberizini      | Atlapetes     | pallidiceps    | Unknown       | America  | Resident  |           | (1, 93)   |
| Fringillidae | Emberizini      | Atlapetes     | rufigenis      | Unknown       | America  | Resident  |           | (156)     |
| Fringillidae | Emberizini      | Atlapetes     | semirufus      | Unknown       | America  | Resident  |           | (234)     |
| Fringillidae | Emberizini      | Atlapetes     | personatus     | Unknown       | America  | Resident  |           | (234)     |
| Fringillidae | Emberizini      | Atlapetes     | fulviceps      | Unknown       | America  | Partial   |           | (156)     |
| Fringillidae | Emberizini      | Atlapetes     | citrinellus    | Unknown       | America  | Resident  |           | (156)     |
| Fringillidae | Emberizini      | Atlapetes     | brunneinucha   | Pair          | America  | Resident  | 2         | (466)     |
| Fringillidae | Emberizini      | Atlapetes     | virenticeps    | Unknown       | America  | Resident  |           | (390)     |
| Fringillidae | Emberizini      | Atlapetes     | atricapillus   | Pair          | America  | Resident  | 2         | (466)     |
| Fringillidae | Emberizini      | Atlapetes     | torquatus      | Pair          | America  | Resident  |           | (335)     |
| Fringillidae | Emberizini      | Pezopetes     | capitalis      | Pair          | America  | Resident  | 1         | (466)     |
| Fringillidae | Emberizini      | Pselliophorus | tibialis       | Unknown       | America  | Resident  | 1         | (466)     |
| Fringillidae | Emberizini      | Pselliophorus | luteoviridis   | Unknown       | America  | Resident  |           | (46)      |
| Fringillidae | Emberizini      | Lysurus       | crassirostris  | Unknown       | America  | Resident  | 2         | (37, 535) |
| Fringillidae | Emberizini      | Lysurus       | castaneiceps   | Unknown       | America  | Resident  | 2         | (443)     |
| Fringillidae | Emberizini      | Gubernatrix   | cristata       | Unknown       | America  | Resident  |           | (93)      |
| Fringillidae | Emberizini      | Paroaria      | coronata       | Unknown       | America  | Resident  |           | (413)     |
| Fringillidae | Emberizini      | Paroaria      | dominicana     | Unknown       | America  | Resident  |           | (413)     |
| Fringillidae | Emberizini      | Paroaria      | gularis        | Pair          | America  | Resident  | 2         | (135)     |
| Fringillidae | Emberizini      | Paroaria      | baeri          | Unknown       | America  | Resident  |           | (413)     |
| Fringillidae | Emberizini      | Paroaria      | capitata       | Unknown       | America  | Resident  |           | (413)     |
| Fringillidae | Parulini        | Vermivora     | bachmanii      | Unknown       | Nearctic | Migration | 3         | (112)     |
| Fringillidae | Parulini        | Vermivora     | pinus          | Occasional    | Nearctic | Migration | 5         | (186)     |
| Fringillidae | Parulini        | Vermivora     | chrysoptera    | Pair          | Nearctic | Migration | 4         | (112)     |
| Fringillidae | Parulini        | Vermivora     | peregrina      | Pair          | Nearctic | Migration | 6         | (112)     |
| Fringillidae | Parulini        | Vermivora     | celata         | Pair          | Nearctic | Migration | 4         | (112)     |
| Fringillidae | Parulini        | Vermivora     | ruficapilla    | Pair          | Nearctic | Migration | 4         | (112)     |
| Fringillidae | Parulini        | Vermivora     | virginiae      | Pair          | Nearctic | Migration | 4         | (112)     |
| Fringillidae | Parulini        | Vermivora     | crissalis      | Pair          | Nearctic | Migration | 4         | (112)     |
| Fringillidae | Parulini        | Vermivora     | luciae         | Pair          | Nearctic | Migration | 5         | (112)     |
| Fringillidae | Parulini        | Parula        | americana      | Pair          | Nearctic | Migration | 5         | (112)     |
| Fringillidae | Parulini        | Parula        | pitiayumi      | Pair          | America  | Resident  | 2         | (112)     |
| Fringillidae | Parulini        | Parula        | supercilliosa  | Unknown       | America  | Resident  | 2         | (112)     |
| Fringillidae | Parulini        | Parula        | gutturalis     | Unknown       | America  | Resident  | 2         | (112)     |
| Fringillidae | Parulini        | Dendroica     | petechia       | Pair          | Nearctic | Migration | 4         | (112)     |
| Fringillidae | Parulini        | Dendroica     | pennsylvanica  | Pair          | Nearctic | Migration | 4         | (112)     |
| Fringillidae | Parulini        | Dendroica     | magnolia       | Pair          | Nearctic | Migration | 4         | (112)     |
| Fringillidae | Parulini        | Dendroica     | tigrina        | Pair          | Nearctic | Migration | 6         | (112)     |
| Fringillidae | Parulini        | Dendroica     | caerulescens   | Pair          | Nearctic | Migration | 4         | (112)     |
| Fringillidae | Parulini        | Dendroica     | coronata       | Pair          | Nearctic | Migration | 4         | (112)     |
| Fringillidae | Parulini        | Dendroica     | nigrescens     | Pair          | Nearctic | Migration | 4         | (112)     |
| Fringillidae | Parulini        | Dendroica     | townsendi      | Pair          | Nearctic | Migration | 4         | (112)     |
| Fringillidae | Parulini        | Dendroica     | occidentalis   | Pair          | Nearctic | Migration | 4         | (112)     |
| Fringillidae | Parulini        | Dendroica     | virens         | Pair          | Nearctic | Migration | 4         | (112)     |
| Fringillidae | Parulini        | Dendroica     | chrysoparia    | Pair          | Nearctic | Migration | 4         | (112)     |
| Fringillidae | Parulini        | Dendroica     | fusca          | Pair          | Nearctic | Migration | 4         | (112)     |
| Fringillidae | Parulini        | Dendroica     | dominica       | Pair          | Nearctic | Partial   | 4         | (112)     |
| Fringillidae | Parulini        | Dendroica     | graciae        | Pair          | Nearctic | Partial   | 3         | (112)     |
| Fringillidae | Parulini        | Dendroica     | adelaidae      | Pair          | America  | Resident  | Endemic 2 | (112)     |
| Fringillidae | Parulini        | Dendroica     | pityophila     | Pair          | America  | Resident  | Endemic 2 | (112)     |
| Fringillidae | Parulini        | Dendroica     | pinus          | Pair          | Nearctic | Partial   | 4         | (112)     |
| Fringillidae | Parulini        | Dendroica     | kirtlandii     | Pair          | Nearctic | Migration | 4         | (112)     |
| Fringillidae | Parulini        | Dendroica     | discolor       | Occasional    | Nearctic | Migration | 4         | (365)     |
| Fringillidae | Parulini        | Dendroica     | vitellina      | Unknown       | America  | Resident  | Endemic 2 | (112)     |
| Fringillidae | Parulini        | Dendroica     | palmarum       | Pair          | Nearctic | Migration | 4         | (112)     |
| Fringillidae | Parulini        | Dendroica     | castanea       | Pair          | Nearctic | Migration | 5         | (112)     |
| Fringillidae | Parulini        | Dendroica     | striata        | Occasional    | Nearctic | Migration | 4         | (244)     |
| Fringillidae | Parulini        | Dendroica     | cerulea        | Pair          | Nearctic | Migration | 4         | (112)     |
| Fringillidae | Parulini        | Dendroica     | plumbea        | Unknown       | America  | Resident  | Endemic 2 | (112)     |
| Fringillidae | Parulini        | Dendroica     | pharetra       | Unknown       | America  | Resident  | Endemic 3 | (112)     |
| Fringillidae | Parulini        | Dendroica     | angelae        | Unknown       | America  | Resident  | Endemic 2 | (112)     |
| Fringillidae | Parulini        | Catharopeza   | bishopi        | Unknown       | America  | Resident  | Endemic 2 | (112)     |
| Fringillidae | Parulini        | Mniotilta     | varia          | Pair          | Nearctic | Migration | 5         | (112)     |
| Fringillidae | Parulini        | Setophaga     | ruticilla      | Pair          | Nearctic | Migration | 4         | (112)     |
| Fringillidae | Parulini        | Protonotaria  | citrea         | Pair          | Nearctic | Migration | 5         | (112)     |

| Family       | Clade Reference | Genus        | species          | Parental care | Region   | Movement  | Island  | Clutch      |
|--------------|-----------------|--------------|------------------|---------------|----------|-----------|---------|-------------|
| Fringillidae | Parulini        | Helmitheros  | vermivorus       | Pair          | Nearctic | Migration |         | 4 (112)     |
| Fringillidae | Parulini        | Limnothlypis | swainsonii       | Pair          | Nearctic | Migration |         | 3 (112)     |
| Fringillidae | Parulini        | Seiurus      | aurocapillus     | Cooperation   | Nearctic | Migration |         | 4 (275)     |
| Fringillidae | Parulini        | Seiurus      | noveboracensis   | Pair          | Nearctic | Migration |         | 4 (112)     |
| Fringillidae | Parulini        | Seiurus      | motacilla        | Pair          | Nearctic | Migration |         | 5 (112)     |
| Fringillidae | Parulini        | Oporornis    | formosus         | Pair          | Nearctic | Migration |         | 4 (112)     |
| Fringillidae | Parulini        | Oporornis    | agilis           | Pair          | Nearctic | Migration |         | 4 (112)     |
| Fringillidae | Parulini        | Oporornis    | philadelphia     | Pair          | Nearctic | Migration |         | 4 (112)     |
| Fringillidae | Parulini        | Oporornis    | tolmiei          | Pair          | Nearctic | Migration |         | 4 (112)     |
| Fringillidae | Parulini        | Geothlypis   | trichas          | Pair          | Nearctic | Migration | Endemic | 4 (112)     |
| Fringillidae | Parulini        | Geothlypis   | beldingi         | Unknown       | America  | Resident  |         | 3 (112)     |
| Fringillidae | Parulini        | Geothlypis   | flavovelata      | Unknown       | America  | Resident  |         | (112)       |
| Fringillidae | Parulini        | Geothlypis   | rostrata         | Unknown       | America  | Resident  | Endemic | 2 (112)     |
| Fringillidae | Parulini        | Geothlypis   | semiflava        | Unknown       | America  | Resident  |         | 2 (112)     |
| Fringillidae | Parulini        | Geothlypis   | speciosa         | Unknown       | America  | Resident  |         | (112)       |
| Fringillidae | Parulini        | Geothlypis   | nelsoni          | Unknown       | America  | Resident  |         | (112)       |
| Fringillidae | Parulini        | Geothlypis   | aequinoctialis   | Unknown       | America  | Partial   |         | 2 (73, 112) |
| Fringillidae | Parulini        | Geothlypis   | poliocephala     | Unknown       | America  | Resident  |         | 2 (112)     |
| Fringillidae | Parulini        | Microligea   | palustris        | Unknown       | America  | Resident  | Endemic | 2 (112)     |
| Fringillidae | Parulini        | Teretistris  | fermandinae      | Unknown       | America  | Resident  | Endemic | (112)       |
| Fringillidae | Parulini        | Teretistris  | fornsi           | Unknown       | America  | Resident  | Endemic | (46)        |
| Fringillidae | Parulini        | Leucopeza    | semperi          | Occasional    | America  | Migration |         | 3 (478)     |
| Fringillidae | Parulini        | Wilsonia     | citrina          | Pair          | America  | Migration |         | 5 (112)     |
| Fringillidae | Parulini        | Wilsonia     | pusilla          | Pair          | America  | Migration |         | 4 (112)     |
| Fringillidae | Parulini        | Wilsonia     | canadensis       | Occasional    | America  | Migration |         | (97)        |
| Fringillidae | Parulini        | Cardellina   | rubrifrons       | Unknown       | America  | Resident  |         | (112)       |
| Fringillidae | Parulini        | Ergaticus    | ruber            | Pair          | America  | Resident  |         | (46)        |
| Fringillidae | Parulini        | Ergaticus    | versicolor       | Pair          | America  | Partial   |         | 4 (112)     |
| Fringillidae | Parulini        | Myioborus    | pictus           | Pair          | America  | Resident  |         | 2 (112)     |
| Fringillidae | Parulini        | Myioborus    | miniatus         | Unknown       | America  | Resident  |         | (112)       |
| Fringillidae | Parulini        | Myioborus    | castaneocapillus | Unknown       | America  | Resident  |         | (112)       |
| Fringillidae | Parulini        | Myioborus    | brunniceps       | Unknown       | America  | Resident  |         | (46)        |
| Fringillidae | Parulini        | Myioborus    | pariae           | Unknown       | America  | Resident  |         | (112)       |
| Fringillidae | Parulini        | Myioborus    | albifacies       | Unknown       | America  | Resident  |         | (112)       |
| Fringillidae | Parulini        | Myioborus    | cardonai         | Unknown       | America  | Resident  |         | 2 (112)     |
| Fringillidae | Parulini        | Myioborus    | torquatus        | Unknown       | America  | Resident  |         | 2 (112)     |
| Fringillidae | Parulini        | Myioborus    | melanocephalus   | Unknown       | America  | Resident  |         | (112)       |
| Fringillidae | Parulini        | Myioborus    | ornatus          | Unknown       | America  | Resident  |         | (112)       |
| Fringillidae | Parulini        | Myioborus    | albifrons        | Unknown       | America  | Resident  |         | 2 (112)     |
| Fringillidae | Parulini        | Myioborus    | flavivertex      | Unknown       | America  | Resident  |         | (112)       |
| Fringillidae | Parulini        | Euthlypis    | lachrymosa       | Unknown       | America  | Resident  |         | (112)       |
| Fringillidae | Parulini        | Basileuterus | fraseri          | Unknown       | America  | Resident  |         | (112)       |
| Fringillidae | Parulini        | Basileuterus | bivittatus       | Unknown       | America  | Resident  |         | (112)       |
| Fringillidae | Parulini        | Basileuterus | chrysogaster     | Unknown       | America  | Resident  |         | (112)       |
| Fringillidae | Parulini        | Basileuterus | signatus         | Unknown       | America  | Resident  |         | (112)       |
| Fringillidae | Parulini        | Basileuterus | luteoviridis     | Unknown       | America  | Resident  |         | (112)       |
| Fringillidae | Parulini        | Basileuterus | nigrocristatus   | Unknown       | America  | Resident  |         | (46)        |
| Fringillidae | Parulini        | Basileuterus | griseiceps       | Unknown       | America  | Resident  |         | (112)       |
| Fringillidae | Parulini        | Basileuterus | basilicus        | Unknown       | America  | Resident  |         | (112)       |
| Fringillidae | Parulini        | Basileuterus | cinereicollis    | Unknown       | America  | Resident  |         | (112)       |
| Fringillidae | Parulini        | Basileuterus | conspicillatus   | Unknown       | America  | Resident  |         | (112)       |
| Fringillidae | Parulini        | Basileuterus | coronatus        | Unknown       | America  | Resident  |         | 3 (112)     |
| Fringillidae | Parulini        | Basileuterus | culicivorus      | Unknown       | America  | Resident  |         | (112)       |
| Fringillidae | Parulini        | Basileuterus | trifasciatus     | Unknown       | America  | Resident  |         | (112)       |
| Fringillidae | Parulini        | Basileuterus | hypoleucus       | Unknown       | America  | Resident  |         | 2 (112)     |
| Fringillidae | Parulini        | Basileuterus | ruffifrons       | Unknown       | America  | Resident  |         | (112)       |
| Fringillidae | Parulini        | Basileuterus | belli            | Unknown       | America  | Resident  |         | (112)       |
| Fringillidae | Parulini        | Basileuterus | melanogenys      | Unknown       | America  | Resident  |         | (46)        |
| Fringillidae | Parulini        | Basileuterus | ignotus          | Unknown       | America  | Resident  |         | 2 (112)     |
| Fringillidae | Parulini        | Basileuterus | tristriatus      | Unknown       | America  | Resident  |         | (112)       |
| Fringillidae | Parulini        | Basileuterus | leucoblepharus   | Unknown       | America  | Resident  |         | (112)       |
| Fringillidae | Parulini        | Basileuterus | leucophrys       | Unknown       | America  | Resident  |         | 3 (112)     |
| Fringillidae | Parulini        | Basileuterus | flaveolus        | Pair          | America  | Resident  |         | (112)       |
| Fringillidae | Parulini        | Basileuterus | fulvicauda       | Unknown       | America  | Resident  |         | (112)       |
| Fringillidae | Parulini        | Basileuterus | rivularis        | Pair          | America  | Resident  |         | 2 (112)     |
| Fringillidae | Parulini        | Zeledonia    | coronata         | Pair          | America  | Migration |         | 4 (112)     |
| Fringillidae | Parulini        | Icteria      | virens           | Unknown       | America  | Resident  |         | (112)       |
| Fringillidae | Parulini        | Granatellus  | venustus         | Unknown       | America  | Resident  |         | (112)       |
| Fringillidae | Parulini        | Granatellus  | sallaei          | Unknown       | America  | Resident  |         | (112)       |
| Fringillidae | Parulini        | Granatellus  | pelzelni         | Unknown       | America  | Resident  | Endemic | (46)        |
| Fringillidae | Parulini        | Xenoligea    | montana          | Unknown       | America  | Resident  | Endemic | 2 (112)     |
| Fringillidae | Thraupini       | Coereba      | flaveola         | Pair          | America  | Resident  |         | 2 (466)     |
| Fringillidae | Thraupini       | Conirostrum  | speciosum        | Unknown       | America  | Resident  |         | 3 (234)     |

| Family       | Clade Reference | Genus          | species           | Parental care | Region  | Movement    | Island    | Clutch    |
|--------------|-----------------|----------------|-------------------|---------------|---------|-------------|-----------|-----------|
| Fringillidae | Thraupini       | Conirostrum    | leucogenys        | Unknown       | America | Resident    |           | (234)     |
| Fringillidae | Thraupini       | Conirostrum    | bicolor           | Pair          | America | Resident    | 2         | (151)     |
| Fringillidae | Thraupini       | Conirostrum    | margaritae        | Unknown       | America | Resident    |           | (413)     |
| Fringillidae | Thraupini       | Conirostrum    | cinereum          | Unknown       | America | Resident    |           | (156)     |
| Fringillidae | Thraupini       | Conirostrum    | tamarugense       | Unknown       | America | Altitudinal |           | (144)     |
| Fringillidae | Thraupini       | Conirostrum    | ferrugineiventre  | Unknown       | America | Resident    |           | (156)     |
| Fringillidae | Thraupini       | Conirostrum    | rufum             | Unknown       | America | Resident    |           | (234)     |
| Fringillidae | Thraupini       | Conirostrum    | sitticolor        | Unknown       | America | Resident    |           | (234)     |
| Fringillidae | Thraupini       | Conirostrum    | albifrons         | Unknown       | America | Resident    |           | (234)     |
| Fringillidae | Thraupini       | Oreomanes      | fraseri           | Unknown       | America | Resident    |           | (255)     |
| Fringillidae | Thraupini       | Orchesticus    | abeillei          | Unknown       | America | Resident    | 2         | (255)     |
| Fringillidae | Thraupini       | Schistochlamys | ruficapillus      | Unknown       | America | Resident    |           | (255)     |
| Fringillidae | Thraupini       | Schistochlamys | melanopis         | Unknown       | America | Resident    | 2         | (234)     |
| Fringillidae | Thraupini       | Neothraupis    | fasciata          | Cooperation   | America | Resident    | 3         | (12)      |
| Fringillidae | Thraupini       | Cypsnagra      | hirundinacea      | Cooperation   | America | Resident    | 4         | (255)     |
| Fringillidae | Thraupini       | Conothraupis   | speculigera       | Unknown       | America | Resident    |           | (255)     |
| Fringillidae | Thraupini       | Conothraupis   | mesoleuca         | Unknown       | America | Resident    |           | (93)      |
| Fringillidae | Thraupini       | Lamprospiza    | melanoleuca       | Unknown       | America | Resident    |           | (255)     |
| Fringillidae | Thraupini       | Cissopis       | leveriana         | Unknown       | America | Resident    | 2         | (255)     |
| Fringillidae | Thraupini       | Chlorornis     | riefferii         | Unknown       | America | Resident    |           | (255)     |
| Fringillidae | Thraupini       | Compsothraupis | loricata          | Unknown       | America | Resident    |           | (255)     |
| Fringillidae | Thraupini       | Sericossypha   | albobristata      | Unknown       | America | Resident    |           | (255)     |
| Fringillidae | Thraupini       | Nesospingus    | speculiferus      | Unknown       | America | Resident    | Endemic 2 | (255)     |
| Fringillidae | Thraupini       | Chlorospingus  | ophthalmicus      | Pair          | America | Migration   | 2         | (255)     |
| Fringillidae | Thraupini       | Chlorospingus  | tacarcunae        | Unknown       | America | Resident    |           | (255)     |
| Fringillidae | Thraupini       | Chlorospingus  | inornatus         | Unknown       | America | Resident    |           | (255)     |
| Fringillidae | Thraupini       | Chlorospingus  | semifuscus        | Pair          | America | Resident    |           | (48)      |
| Fringillidae | Thraupini       | Chlorospingus  | pileatus          | Unknown       | America | Resident    | 2         | (255)     |
| Fringillidae | Thraupini       | Chlorospingus  | parvirostris      | Unknown       | America | Resident    |           | (255)     |
| Fringillidae | Thraupini       | Chlorospingus  | flavigularis      | Unknown       | America | Resident    |           | (255)     |
| Fringillidae | Thraupini       | Chlorospingus  | flavovirens       | Unknown       | America | Resident    |           | (93)      |
| Fringillidae | Thraupini       | Chlorospingus  | canicularis       | Unknown       | America | Resident    |           | (255)     |
| Fringillidae | Thraupini       | Cnemoscopus    | rubrirostris      | Unknown       | America | Resident    |           | (255)     |
| Fringillidae | Thraupini       | Hemispingus    | atropileus        | Unknown       | America | Resident    |           | (255)     |
| Fringillidae | Thraupini       | Hemispingus    | calophrys         | Unknown       | America | Resident    |           | (255)     |
| Fringillidae | Thraupini       | Hemispingus    | parodii           | Unknown       | America | Resident    |           | (255)     |
| Fringillidae | Thraupini       | Hemispingus    | superciliaris     | Unknown       | America | Resident    |           | (255)     |
| Fringillidae | Thraupini       | Hemispingus    | reyi              | Unknown       | America | Resident    |           | (255)     |
| Fringillidae | Thraupini       | Hemispingus    | frontalis         | Unknown       | America | Resident    |           | (255)     |
| Fringillidae | Thraupini       | Hemispingus    | melanotis         | Unknown       | America | Resident    |           | (255)     |
| Fringillidae | Thraupini       | Hemispingus    | goeringi          | Unknown       | America | Resident    |           | (93)      |
| Fringillidae | Thraupini       | Hemispingus    | rufosuperciliaris | Unknown       | America | Resident    |           | (46)      |
| Fringillidae | Thraupini       | Hemispingus    | verticalis        | Unknown       | America | Resident    |           | (255)     |
| Fringillidae | Thraupini       | Hemispingus    | xanthophthalmus   | Unknown       | America | Resident    |           | (255)     |
| Fringillidae | Thraupini       | Hemispingus    | trifasciatus      | Unknown       | America | Resident    |           | (255)     |
| Fringillidae | Thraupini       | Pyrrhocomma    | ruficeps          | Unknown       | America | Resident    |           | (255)     |
| Fringillidae | Thraupini       | Thlypopsis     | fulviceps         | Unknown       | America | Resident    |           | (255)     |
| Fringillidae | Thraupini       | Thlypopsis     | ornata            | Unknown       | America | Resident    |           | (255)     |
| Fringillidae | Thraupini       | Thlypopsis     | pectoralis        | Unknown       | America | Resident    |           | (255)     |
| Fringillidae | Thraupini       | Thlypopsis     | sordida           | Unknown       | America | Resident    | 2         | (255)     |
| Fringillidae | Thraupini       | Thlypopsis     | inornata          | Unknown       | America | Resident    |           | (255)     |
| Fringillidae | Thraupini       | Thlypopsis     | ruficeps          | Unknown       | America | Resident    |           | (255)     |
| Fringillidae | Thraupini       | Hemithraupis   | guira             | Unknown       | America | Resident    |           | (255)     |
| Fringillidae | Thraupini       | Hemithraupis   | ruficapilla       | Unknown       | America | Resident    |           | (255)     |
| Fringillidae | Thraupini       | Hemithraupis   | flavicollis       | Unknown       | America | Resident    |           | (255)     |
| Fringillidae | Thraupini       | Chrysothlypis  | chrysomelas       | Unknown       | America | Resident    |           | (331)     |
| Fringillidae | Thraupini       | Chrysothlypis  | salmoni           | Cooperation   | America | Resident    |           | (255)     |
| Fringillidae | Thraupini       | Nemosia        | pileata           | Pair          | America | Resident    | 2         | (255)     |
| Fringillidae | Thraupini       | Nemosia        | rourei            | Unknown       | America | Resident    |           | (93, 502) |
| Fringillidae | Thraupini       | Phaenicophilus | palmarum          | Unknown       | America | Resident    | Endemic 2 | (255)     |
| Fringillidae | Thraupini       | Phaenicophilus | poliocephalus     | Unknown       | America | Resident    | Endemic 3 | (255)     |
| Fringillidae | Thraupini       | Calyptophilus  | frugivorus        | Unknown       | America | Resident    | Endemic   | (93)      |
| Fringillidae | Thraupini       | Rhodinocichla  | rosea             | Pair          | America | Resident    | 2         | (255)     |
| Fringillidae | Thraupini       | Mitrospingus   | cassinii          | Cooperation   | America | Resident    | 2         | (255)     |
| Fringillidae | Thraupini       | Mitrospingus   | oleagineus        | Unknown       | America | Resident    |           | (255)     |
| Fringillidae | Thraupini       | Chlorothraupis | carrioli          | Unknown       | America | Resident    | 2         | (255)     |
| Fringillidae | Thraupini       | Chlorothraupis | olivacea          | Unknown       | America | Resident    |           | (255)     |
| Fringillidae | Thraupini       | Chlorothraupis | stolzmanni        | Unknown       | America | Resident    | 1         | (255)     |
| Fringillidae | Thraupini       | Orthogonyx     | chloricterus      | Unknown       | America | Resident    |           | (255)     |
| Fringillidae | Thraupini       | Eucometis      | penicillata       | Pair          | America | Resident    | 2         | (255)     |
| Fringillidae | Thraupini       | Lanio          | fulvus            | Unknown       | America | Resident    |           | (255)     |
| Fringillidae | Thraupini       | Lanio          | versicolor        | Unknown       | America | Resident    |           | (480)     |
| Fringillidae | Thraupini       | Lanio          | aurantius         | Unknown       | America | Resident    |           | (255)     |



| Family       | Clade Reference | Genus           | species         | Parental care | Region   | Movement  | Island  | Clutch      |
|--------------|-----------------|-----------------|-----------------|---------------|----------|-----------|---------|-------------|
| Fringillidae | Thraupini       | Lanio           | leucothorax     | Unknown       | America  | Resident  |         | 2 (255)     |
| Fringillidae | Thraupini       | Creurgops       | verticalis      | Unknown       | America  | Resident  |         | (255)       |
| Fringillidae | Thraupini       | Creurgops       | dentata         | Unknown       | America  | Resident  |         | (255)       |
| Fringillidae | Thraupini       | Heterospingus   | rubrifrons      | Unknown       | America  | Resident  |         | (255)       |
| Fringillidae | Thraupini       | Heterospingus   | xanthopygius    | Unknown       | America  | Resident  |         | (255)       |
| Fringillidae | Thraupini       | Tachyphonus     | cristatus       | Unknown       | America  | Resident  |         | (255)       |
| Fringillidae | Thraupini       | Tachyphonus     | rufiventer      | Unknown       | America  | Resident  |         | (255)       |
| Fringillidae | Thraupini       | Tachyphonus     | surinamus       | Unknown       | America  | Resident  |         | (255)       |
| Fringillidae | Thraupini       | Tachyphonus     | luctuosus       | Unknown       | America  | Resident  |         | 3 (255)     |
| Fringillidae | Thraupini       | Tachyphonus     | delatrii        | Unknown       | America  | Resident  |         | (255)       |
| Fringillidae | Thraupini       | Tachyphonus     | coronatus       | Pair          | America  | Resident  |         | 3 (255)     |
| Fringillidae | Thraupini       | Tachyphonus     | rufus           | Pair          | America  | Resident  |         | 2 (255)     |
| Fringillidae | Thraupini       | Tachyphonus     | phoenicius      | Unknown       | America  | Resident  |         | 1 (255)     |
| Fringillidae | Thraupini       | Trichothraupis  | melanops        | Unknown       | America  | Resident  |         | (255)       |
| Fringillidae | Thraupini       | Habia           | rubica          | Pair          | America  | Resident  |         | 2 (162)     |
| Fringillidae | Thraupini       | Habia           | fuscicauda      | Cooperation   | America  | Resident  |         | 3 (255)     |
| Fringillidae | Thraupini       | Habia           | gutturialis     | Unknown       | America  | Resident  |         | (255)       |
| Fringillidae | Thraupini       | Habia           | atrimaxillaris  | Unknown       | America  | Resident  |         | (46)        |
| Fringillidae | Thraupini       | Habia           | cristata        | Unknown       | America  | Resident  |         | (255)       |
| Fringillidae | Thraupini       | Piranga         | bidentata       | Unknown       | America  | Resident  |         | 2 (255)     |
| Fringillidae | Thraupini       | Piranga         | flava           | Pair          | America  | Partial   |         | 2 (73, 255) |
| Fringillidae | Thraupini       | Piranga         | rubra           | Pair          | Nearctic | Migration |         | 4 (424)     |
| Fringillidae | Thraupini       | Piranga         | roseogularis    | Unknown       | America  | Resident  |         | (255)       |
| Fringillidae | Thraupini       | Piranga         | olivacea        | Pair          | Nearctic | Migration |         | 4 (352)     |
| Fringillidae | Thraupini       | Piranga         | ludoviciana     | Pair          | Nearctic | Migration |         | 4 (242)     |
| Fringillidae | Thraupini       | Piranga         | leucoptera      | Unknown       | America  | Resident  |         | (255)       |
| Fringillidae | Thraupini       | Piranga         | erythrocephala  | Unknown       | America  | Resident  |         | (255)       |
| Fringillidae | Thraupini       | Piranga         | piriceps        | Unknown       | America  | Resident  |         | (255)       |
| Fringillidae | Thraupini       | Calochaetes     | coccineus       | Unknown       | America  | Resident  |         | (255)       |
| Fringillidae | Thraupini       | Ramphocelus     | sanguinolentus  | Unknown       | America  | Resident  |         | 3 (255)     |
| Fringillidae | Thraupini       | Ramphocelus     | nigrogularis    | Unknown       | America  | Resident  |         | (255)       |
| Fringillidae | Thraupini       | Ramphocelus     | dimidiatus      | Unknown       | America  | Resident  |         | 2 (255)     |
| Fringillidae | Thraupini       | Ramphocelus     | melanogaster    | Unknown       | America  | Resident  |         | (255)       |
| Fringillidae | Thraupini       | Ramphocelus     | carbo           | Unknown       | America  | Resident  |         | (234)       |
| Fringillidae | Thraupini       | Ramphocelus     | bresilius       | Pair          | America  | Resident  |         | 2 (255)     |
| Fringillidae | Thraupini       | Ramphocelus     | passerini       | Pair          | America  | Resident  |         | 2 (255)     |
| Fringillidae | Thraupini       | Ramphocelus     | flammigerus     | Pair          | America  | Resident  |         | (255)       |
| Fringillidae | Thraupini       | Spindalis       | zena            | Unknown       | America  | Resident  | Endemic | 3 (255)     |
| Fringillidae | Thraupini       | Thraupis        | episcopus       | Pair          | America  | Resident  |         | 2 (190)     |
| Fringillidae | Thraupini       | Thraupis        | glaucocolpa     | Unknown       | America  | Resident  |         | (255)       |
| Fringillidae | Thraupini       | Thraupis        | sayaca          | Pair          | America  | Resident  |         | 3 (255)     |
| Fringillidae | Thraupini       | Thraupis        | cyanoptera      | Unknown       | America  | Resident  |         | 2 (255)     |
| Fringillidae | Thraupini       | Thraupis        | ornata          | Unknown       | America  | Resident  |         | 3 (255)     |
| Fringillidae | Thraupini       | Thraupis        | abbas           | Pair          | America  | Resident  |         | 2 (255)     |
| Fringillidae | Thraupini       | Thraupis        | palmarum        | Pair          | America  | Resident  |         | 2 (255)     |
| Fringillidae | Thraupini       | Thraupis        | cyaenocephala   | Unknown       | America  | Resident  |         | 2 (255)     |
| Fringillidae | Thraupini       | Thraupis        | bonariensis     | Unknown       | America  | Partial   |         | 3 (255)     |
| Fringillidae | Thraupini       | Cyanicterus     | cyanicterus     | Unknown       | America  | Resident  |         | (255)       |
| Fringillidae | Thraupini       | Bangsia         | arcae           | Unknown       | America  | Resident  |         | (255)       |
| Fringillidae | Thraupini       | Bangsia         | melanochlamys   | Unknown       | America  | Resident  |         | (93)        |
| Fringillidae | Thraupini       | Bangsia         | rothschildi     | Unknown       | America  | Resident  |         | (255)       |
| Fringillidae | Thraupini       | Bangsia         | edwardsi        | Unknown       | America  | Resident  |         | 2 (418)     |
| Fringillidae | Thraupini       | Bangsia         | aureocincta     | Unknown       | America  | Resident  |         | (255)       |
| Fringillidae | Thraupini       | Buthraupis      | montana         | Unknown       | America  | Resident  |         | (255)       |
| Fringillidae | Thraupini       | Buthraupis      | eximia          | Unknown       | America  | Resident  |         | (255)       |
| Fringillidae | Thraupini       | Buthraupis      | aureodorsalis   | Unknown       | America  | Resident  |         | (255)       |
| Fringillidae | Thraupini       | Buthraupis      | wetmorei        | Unknown       | America  | Resident  |         | (255)       |
| Fringillidae | Thraupini       | Wetmorethraupis | sterrhopteron   | Unknown       | America  | Resident  |         | (255)       |
| Fringillidae | Thraupini       | Anisognathus    | melanogenys     | Unknown       | America  | Resident  |         | (255)       |
| Fringillidae | Thraupini       | Anisognathus    | lacrymosus      | Unknown       | America  | Resident  |         | (255)       |
| Fringillidae | Thraupini       | Anisognathus    | igniventris     | Unknown       | America  | Resident  |         | 2 (255)     |
| Fringillidae | Thraupini       | Anisognathus    | somptuosus      | Unknown       | America  | Resident  |         | (471)       |
| Fringillidae | Thraupini       | Anisognathus    | notabilis       | Unknown       | America  | Resident  |         | (471)       |
| Fringillidae | Thraupini       | Stephanophorus  | diadematus      | Unknown       | America  | Resident  |         | 4 (255)     |
| Fringillidae | Thraupini       | Iridosornis     | porphyrocephala | Unknown       | America  | Resident  |         | (255)       |
| Fringillidae | Thraupini       | Iridosornis     | analis          | Unknown       | America  | Resident  |         | (255)       |
| Fringillidae | Thraupini       | Iridosornis     | jelskii         | Unknown       | America  | Resident  |         | (255)       |
| Fringillidae | Thraupini       | Iridosornis     | rufivertex      | Unknown       | America  | Resident  |         | (255)       |
| Fringillidae | Thraupini       | Iridosornis     | reinhardti      | Unknown       | America  | Resident  |         | (255)       |
| Fringillidae | Thraupini       | Dubusia         | taeniata        | Unknown       | America  | Resident  |         | (255)       |
| Fringillidae | Thraupini       | Delothraupis    | castaneoventris | Unknown       | America  | Resident  |         | (255)       |
| Fringillidae | Thraupini       | Pipraeidea      | melanonota      | Pair          | America  | Resident  |         | (255)       |
| Fringillidae | Thraupini       | Euphonia        | jamaica         | Unknown       | America  | Resident  | Endemic | 3 (255)     |

| Family       | Clade Reference | Genus        | species           | Parental care | Region  | Movement | Island  | Clutch       |
|--------------|-----------------|--------------|-------------------|---------------|---------|----------|---------|--------------|
| Fringillidae | Thraupini       | Euphonia     | plumbea           | Unknown       | America | Resident |         | (255)        |
| Fringillidae | Thraupini       | Euphonia     | affinis           | Unknown       | America | Resident |         | 3 (255)      |
| Fringillidae | Thraupini       | Euphonia     | luteicapilla      | Pair          | America | Resident |         | 3 (255)      |
| Fringillidae | Thraupini       | Euphonia     | chlorotica        | Pair          | America | Resident |         | 4 (255)      |
| Fringillidae | Thraupini       | Euphonia     | trinitatis        | Pair          | America | Resident |         | 3 (255)      |
| Fringillidae | Thraupini       | Euphonia     | concinna          | Unknown       | America | Resident |         | (255)        |
| Fringillidae | Thraupini       | Euphonia     | saturata          | Unknown       | America | Resident |         | (255)        |
| Fringillidae | Thraupini       | Euphonia     | finschi           | Unknown       | America | Resident |         | (255)        |
| Fringillidae | Thraupini       | Euphonia     | violacea          | Pair          | America | Resident |         | 4 (255)      |
| Fringillidae | Thraupini       | Euphonia     | laniirostris      | Suspected     | America | Resident |         | 4 (255)      |
| Fringillidae | Thraupini       | Euphonia     | hirundinacea      | Pair          | America | Resident |         | 5 (437)      |
| Fringillidae | Thraupini       | Euphonia     | chalybea          | Unknown       | America | Resident |         | (255)        |
| Fringillidae | Thraupini       | Euphonia     | elegantissima     | Unknown       | America | Resident |         | (255)        |
| Fringillidae | Thraupini       | Euphonia     | musica            | Unknown       | America | Resident | Endemic | 2 (255)      |
| Fringillidae | Thraupini       | Euphonia     | cynocephala       | Unknown       | America | Resident |         | 2 (255)      |
| Fringillidae | Thraupini       | Euphonia     | imitans           | Pair          | America | Resident |         | 3 (255)      |
| Fringillidae | Thraupini       | Euphonia     | fulvicrissa       | Unknown       | America | Resident |         | (255)        |
| Fringillidae | Thraupini       | Euphonia     | gouldi            | Unknown       | America | Resident |         | 3 (255)      |
| Fringillidae | Thraupini       | Euphonia     | chrysopasta       | Unknown       | America | Resident |         | (255)        |
| Fringillidae | Thraupini       | Euphonia     | mesochrysa        | Unknown       | America | Resident |         | (255)        |
| Fringillidae | Thraupini       | Euphonia     | minuta            | Pair          | America | Resident |         | 3 (255)      |
| Fringillidae | Thraupini       | Euphonia     | anneae            | Unknown       | America | Resident |         | (255)        |
| Fringillidae | Thraupini       | Euphonia     | xanthogaster      | Unknown       | America | Resident |         | 4 (255)      |
| Fringillidae | Thraupini       | Euphonia     | rufiventris       | Unknown       | America | Resident |         | (255)        |
| Fringillidae | Thraupini       | Euphonia     | cayennensis       | Unknown       | America | Resident |         | 4 (255)      |
| Fringillidae | Thraupini       | Euphonia     | pectoralis        | Unknown       | America | Resident |         | 3 (126)      |
| Fringillidae | Thraupini       | Chlorophonia | flavirostris      | Unknown       | America | Resident |         | (255)        |
| Fringillidae | Thraupini       | Chlorophonia | cyanea            | Pair          | America | Resident |         | 3 (255)      |
| Fringillidae | Thraupini       | Chlorophonia | pyrrhophrys       | Unknown       | America | Resident |         | (255)        |
| Fringillidae | Thraupini       | Chlorophonia | occipitalis       | Unknown       | America | Resident |         | 3 (255)      |
| Fringillidae | Thraupini       | Chlorophonia | callophrys        | Pair          | America | Resident |         | 3 (255)      |
| Fringillidae | Thraupini       | Chlorochrysa | phoenicotis       | Unknown       | America | Resident |         | (255)        |
| Fringillidae | Thraupini       | Chlorochrysa | calliparaea       | Unknown       | America | Resident |         | (255)        |
| Fringillidae | Thraupini       | Chlorochrysa | nitidissima       | Unknown       | America | Resident |         | (93)         |
| Fringillidae | Thraupini       | Tangara      | inornata          | Cooperation   | America | Resident |         | 2 (255)      |
| Fringillidae | Thraupini       | Tangara      | mexicana          | Cooperation   | America | Resident |         | 2 (255)      |
| Fringillidae | Thraupini       | Tangara      | cabanisi          | Cooperation   | America | Resident |         | 2 (303)      |
| Fringillidae | Thraupini       | Tangara      | palmeri           | Unknown       | America | Resident |         | (255)        |
| Fringillidae | Thraupini       | Tangara      | chilensis         | Unknown       | America | Resident |         | (527)        |
| Fringillidae | Thraupini       | Tangara      | fastuosa          | Unknown       | America | Resident |         | (93)         |
| Fringillidae | Thraupini       | Tangara      | seledon           | Uniparental   | America | Resident |         | (255)        |
| Fringillidae | Thraupini       | Tangara      | cynocephala       | Unknown       | America | Resident |         | 3 (255)      |
| Fringillidae | Thraupini       | Tangara      | desmaresti        | Unknown       | America | Resident |         | (255)        |
| Fringillidae | Thraupini       | Tangara      | cyanovenstris     | Cooperation   | America | Resident |         | (255)        |
| Fringillidae | Thraupini       | Tangara      | johannae          | Unknown       | America | Resident |         | (255)        |
| Fringillidae | Thraupini       | Tangara      | schrunkii         | Unknown       | America | Resident |         | (332)        |
| Fringillidae | Thraupini       | Tangara      | florida           | Unknown       | America | Resident |         | (255)        |
| Fringillidae | Thraupini       | Tangara      | arthus            | Unknown       | America | Resident |         | (255)        |
| Fringillidae | Thraupini       | Tangara      | icterocephala     | Pair          | America | Resident |         | 2 (255)      |
| Fringillidae | Thraupini       | Tangara      | xanthocephala     | Unknown       | America | Resident |         | 2 (255)      |
| Fringillidae | Thraupini       | Tangara      | chrysotis         | Unknown       | America | Resident |         | (255)        |
| Fringillidae | Thraupini       | Tangara      | parzudakii        | Unknown       | America | Resident |         | (255)        |
| Fringillidae | Thraupini       | Tangara      | xanthogastra      | Unknown       | America | Resident |         | (255)        |
| Fringillidae | Thraupini       | Tangara      | punctata          | Unknown       | America | Resident |         | (255)        |
| Fringillidae | Thraupini       | Tangara      | guttata           | Cooperation   | America | Resident |         | 2 (255)      |
| Fringillidae | Thraupini       | Tangara      | varia             | Unknown       | America | Resident |         | (255)        |
| Fringillidae | Thraupini       | Tangara      | rufigula          | Unknown       | America | Resident |         | (255)        |
| Fringillidae | Thraupini       | Tangara      | gyrola            | Pair          | America | Resident |         | 2 (151, 255) |
| Fringillidae | Thraupini       | Tangara      | lavinia           | Unknown       | America | Resident |         | (331)        |
| Fringillidae | Thraupini       | Tangara      | cayana            | Unknown       | America | Resident | Endemic | 2 (255)      |
| Fringillidae | Thraupini       | Tangara      | cucullata         | Unknown       | America | Resident |         | (255)        |
| Fringillidae | Thraupini       | Tangara      | peruviana         | Unknown       | America | Nomadic  |         | (346)        |
| Fringillidae | Thraupini       | Tangara      | preciosa          | Unknown       | America | Resident |         | (255)        |
| Fringillidae | Thraupini       | Tangara      | vitriolina        | Unknown       | America | Resident |         | 2 (255)      |
| Fringillidae | Thraupini       | Tangara      | meyereschauenseei | Unknown       | America | Resident |         | (93)         |
| Fringillidae | Thraupini       | Tangara      | rufigenis         | Unknown       | America | Resident |         | (255)        |
| Fringillidae | Thraupini       | Tangara      | ruficervix        | Unknown       | America | Resident |         | 2 (255)      |
| Fringillidae | Thraupini       | Tangara      | labradorides      | Unknown       | America | Resident |         | (255)        |
| Fringillidae | Thraupini       | Tangara      | cyanotis          | Unknown       | America | Resident |         | (255)        |
| Fringillidae | Thraupini       | Tangara      | cyanicollis       | Unknown       | America | Resident |         | 2 (255)      |
| Fringillidae | Thraupini       | Tangara      | larvata           | Cooperation   | America | Resident |         | 2 (255)      |
| Fringillidae | Thraupini       | Tangara      | nigrocincta       | Unknown       | America | Resident |         | 2 (255)      |
| Fringillidae | Thraupini       | Tangara      | dowii             | Unknown       | America | Resident |         | (255)        |

| Family       | Clade Reference | Genus            | species         | Parental care | Region  | Movement | Island    | Clutch     |
|--------------|-----------------|------------------|-----------------|---------------|---------|----------|-----------|------------|
| Fringillidae | Thraupini       | Tangara          | fucosa          | Unknown       | America | Resident |           | (255)      |
| Fringillidae | Thraupini       | Tangara          | nigroviridis    | Unknown       | America | Resident |           | (255)      |
| Fringillidae | Thraupini       | Tangara          | vassorii        | Unknown       | America | Resident |           | (255)      |
| Fringillidae | Thraupini       | Tangara          | heinei          | Unknown       | America | Resident |           | (255)      |
| Fringillidae | Thraupini       | Tangara          | phillipsi       | Unknown       | America | Resident |           | (93)       |
| Fringillidae | Thraupini       | Tangara          | viridicollis    | Unknown       | America | Resident |           | (255)      |
| Fringillidae | Thraupini       | Tangara          | argyrofenges    | Unknown       | America | Resident |           | (255)      |
| Fringillidae | Thraupini       | Tangara          | cyanoptera      | Unknown       | America | Resident |           | (255)      |
| Fringillidae | Thraupini       | Tangara          | velia           | Unknown       | America | Resident |           | (255)      |
| Fringillidae | Thraupini       | Tangara          | callophrys      | Unknown       | America | Resident |           | (255)      |
| Fringillidae | Thraupini       | Iridophanes      | pulcherrima     | Unknown       | America | Resident | 2         | (255)      |
| Fringillidae | Thraupini       | Pseudodacnis     | hartlaubi       | Unknown       | America | Resident |           | (93)       |
| Fringillidae | Thraupini       | Dacnis           | albiventris     | Unknown       | America | Resident |           | (255)      |
| Fringillidae | Thraupini       | Dacnis           | lineata         | Unknown       | America | Resident |           | (255)      |
| Fringillidae | Thraupini       | Dacnis           | flaviventer     | Unknown       | America | Resident |           | (255)      |
| Fringillidae | Thraupini       | Dacnis           | nigripes        | Unknown       | America | Resident |           | (93)       |
| Fringillidae | Thraupini       | Dacnis           | venusta         | Unknown       | America | Resident | 2         | (255)      |
| Fringillidae | Thraupini       | Dacnis           | cayana          | Cooperation   | America | Resident | 2         | (255)      |
| Fringillidae | Thraupini       | Dacnis           | viguieri        | Unknown       | America | Resident |           | (255)      |
| Fringillidae | Thraupini       | Dacnis           | berlepschi      | Unknown       | America | Resident |           | (93)       |
| Fringillidae | Thraupini       | Chlorophanes     | spiza           | Pair          | America | Resident |           | (255)      |
| Fringillidae | Thraupini       | Cyanerpes        | nitidus         | Unknown       | America | Resident |           | (255)      |
| Fringillidae | Thraupini       | Cyanerpes        | lucidus         | Pair          | America | Resident | 2         | (255)      |
| Fringillidae | Thraupini       | Cyanerpes        | caeruleus       | Pair          | America | Resident | 2         | (255)      |
| Fringillidae | Thraupini       | Cyanerpes        | cyaneus         | Pair          | America | Resident | 2         | (255)      |
| Fringillidae | Thraupini       | Xenodacnis       | parina          | Unknown       | America | Resident |           | (255)      |
| Fringillidae | Thraupini       | Tersina          | viridis         | Pair          | America | Partial  | 3         | (73, 255)  |
| Fringillidae | Thraupini       | Catamblyrhynchus | diadema         | Unknown       | America | Resident |           | (235)      |
| Fringillidae | Thraupini       | Oreothraupis     | arremonops      | Unknown       | America | Resident |           | (93)       |
| Fringillidae | Thraupini       | Urothraupis      | stolzmanni      | Unknown       | America | Resident |           | (235)      |
| Fringillidae | Thraupini       | Nephelornis      | oneilli         | Unknown       | America | Resident |           | (255)      |
| Fringillidae | Thraupini       | Charitospiza     | eucosma         | Unknown       | America | Resident |           | (413)      |
| Fringillidae | Thraupini       | Coryphaspiza     | melanotis       | Unknown       | America | Resident |           | (46)       |
| Fringillidae | Thraupini       | Saltatricula     | multicolor      | Unknown       | America | Resident |           | (413)      |
| Fringillidae | Thraupini       | Coryphospingus   | pileatus        | Unknown       | America | Resident |           | (234)      |
| Fringillidae | Thraupini       | Coryphospingus   | cucullatus      | Unknown       | America | Resident |           | (413)      |
| Fringillidae | Thraupini       | Rhodospingus     | cruentus        | Pair          | America | Resident |           | (330)      |
| Fringillidae | Thraupini       | Phrygilus        | atriceps        | Unknown       | America | Resident |           | (156)      |
| Fringillidae | Thraupini       | Phrygilus        | punensis        | Unknown       | America | Resident |           | (156)      |
| Fringillidae | Thraupini       | Phrygilus        | gayi            | Unknown       | America | Partial  |           | (73, 156)  |
| Fringillidae | Thraupini       | Phrygilus        | patagonicus     | Unknown       | America | Partial  |           | (73, 156)  |
| Fringillidae | Thraupini       | Phrygilus        | fruticeti       | Unknown       | America | Resident |           | (156)      |
| Fringillidae | Thraupini       | Phrygilus        | unicolor        | Unknown       | America | Resident |           | (156, 235) |
| Fringillidae | Thraupini       | Phrygilus        | dorsalis        | Unknown       | America | Resident |           | (156)      |
| Fringillidae | Thraupini       | Phrygilus        | erythronotus    | Unknown       | America | Resident |           | (156)      |
| Fringillidae | Thraupini       | Phrygilus        | plebejus        | Unknown       | America | Resident |           | (156)      |
| Fringillidae | Thraupini       | Phrygilus        | carbonarius     | Unknown       | America | Partial  |           | (73, 156)  |
| Fringillidae | Thraupini       | Phrygilus        | alaudinus       | Unknown       | America | Resident |           | (413)      |
| Fringillidae | Thraupini       | Melanodera       | melanodera      | Pair          | America | Resident |           | (156)      |
| Fringillidae | Thraupini       | Melanodera       | xanthogramma    | Unknown       | America | Partial  |           | (73, 156)  |
| Fringillidae | Thraupini       | Haplospiza       | rustica         | Unknown       | America | Nomadic  |           | (466)      |
| Fringillidae | Thraupini       | Haplospiza       | unicolor        | Unknown       | America | Resident |           | (239)      |
| Fringillidae | Thraupini       | Acanthidops      | bairdii         | Unknown       | America | Nomadic  |           | (466)      |
| Fringillidae | Thraupini       | Lophospingus     | pusillus        | Unknown       | America | Resident |           | (413)      |
| Fringillidae | Thraupini       | Lophospingus     | griseocristatus | Unknown       | America | Resident |           | (156)      |
| Fringillidae | Thraupini       | Donacospiza      | albifrons       | Unknown       | America | Resident |           | (413)      |
| Fringillidae | Thraupini       | Rowettia         | goughensis      | Pair          | America | Resident | Endemic 2 | (46)       |
| Fringillidae | Thraupini       | Nesospiza        | acunhae         | Pair          | America | Resident | Endemic   | (46)       |
| Fringillidae | Thraupini       | Nesospiza        | wilkinsi        | Pair          | America | Resident | Endemic 2 | (46)       |
| Fringillidae | Thraupini       | Diuca            | speculifera     | Unknown       | America | Resident |           | (156)      |
| Fringillidae | Thraupini       | Diuca            | diuca           | Pair          | America | Partial  |           | (73, 156)  |
| Fringillidae | Thraupini       | Idiopsar         | brachyurus      | Unknown       | America | Resident |           | (156)      |
| Fringillidae | Thraupini       | Piezorhina       | cinerea         | Unknown       | America | Resident |           | (413)      |
| Fringillidae | Thraupini       | Xenospingus      | concolor        | Unknown       | America | Resident |           | (93)       |
| Fringillidae | Thraupini       | Incaspiza        | pulchra         | Unknown       | America | Resident |           | (156)      |
| Fringillidae | Thraupini       | Incaspiza        | personata       | Unknown       | America | Resident |           | (156)      |
| Fringillidae | Thraupini       | Incaspiza        | ortizi          | Unknown       | America | Resident |           | (93)       |
| Fringillidae | Thraupini       | Incaspiza        | laeta           | Unknown       | America | Resident |           | (413)      |
| Fringillidae | Thraupini       | Incaspiza        | watkinsi        | Unknown       | America | Resident |           | (413)      |
| Fringillidae | Thraupini       | Poospiza         | thoracica       | Unknown       | America | Resident |           | (413)      |
| Fringillidae | Thraupini       | Poospiza         | boliviana       | Unknown       | America | Resident |           | (156)      |
| Fringillidae | Thraupini       | Poospiza         | alticola        | Unknown       | America | Resident |           | (93)       |
| Fringillidae | Thraupini       | Poospiza         | hypochondria    | Unknown       | America | Resident |           | (156)      |

| Family       | Clade Reference | Genus        | species         | Parental care | Region  | Movement  | Island    | Clutch       |
|--------------|-----------------|--------------|-----------------|---------------|---------|-----------|-----------|--------------|
| Fringillidae | Thraupini       | Poospiza     | ornata          | Unknown       | America | Partial   |           | (413)        |
| Fringillidae | Thraupini       | Poospiza     | erythrophrys    | Pair          | America | Resident  |           | (156)        |
| Fringillidae | Thraupini       | Poospiza     | whitii          | Unknown       | America | Resident  |           | (413)        |
| Fringillidae | Thraupini       | Poospiza     | nigrorufa       | Unknown       | America | Resident  |           | (156)        |
| Fringillidae | Thraupini       | Poospiza     | lateralis       | Unknown       | America | Resident  |           | (413)        |
| Fringillidae | Thraupini       | Poospiza     | rubecula        | Unknown       | America | Resident  |           | (93)         |
| Fringillidae | Thraupini       | Poospiza     | garleppi        | Unknown       | America | Resident  |           | (93)         |
| Fringillidae | Thraupini       | Poospiza     | baeri           | Unknown       | America | Resident  |           | (93, 391)    |
| Fringillidae | Thraupini       | Poospiza     | caesar          | Unknown       | America | Resident  |           | (156)        |
| Fringillidae | Thraupini       | Poospiza     | hispaniolensis  | Pair          | America | Resident  | 4         | (330)        |
| Fringillidae | Thraupini       | Poospiza     | torquata        | Unknown       | America | Partial   |           | (73, 156)    |
| Fringillidae | Thraupini       | Poospiza     | melanoleuca     | Unknown       | America | Resident  |           | (413)        |
| Fringillidae | Thraupini       | Poospiza     | cinerea         | Unknown       | America | Resident  |           | (93)         |
| Fringillidae | Thraupini       | Sicalis      | citrina         | Pair          | America | Resident  |           | (234)        |
| Fringillidae | Thraupini       | Sicalis      | lutea           | Unknown       | America | Resident  |           | (156)        |
| Fringillidae | Thraupini       | Sicalis      | uropygialis     | Unknown       | America | Resident  |           | (156)        |
| Fringillidae | Thraupini       | Sicalis      | luteocephala    | Unknown       | America | Resident  |           | (156)        |
| Fringillidae | Thraupini       | Sicalis      | auriventris     | Unknown       | America | Partial   |           | (73, 156)    |
| Fringillidae | Thraupini       | Sicalis      | olivascens      | Unknown       | America | Partial   |           | (73, 156)    |
| Fringillidae | Thraupini       | Sicalis      | lebruni         | Unknown       | America | Resident  |           | (156)        |
| Fringillidae | Thraupini       | Sicalis      | columbiana      | Pair          | America | Resident  | 4         | (234)        |
| Fringillidae | Thraupini       | Sicalis      | flaveola        | Pair          | America | Resident  | 3         | (234)        |
| Fringillidae | Thraupini       | Sicalis      | luteola         | Unknown       | America | Partial   | 3         | (466)        |
| Fringillidae | Thraupini       | Sicalis      | luteiventris    | Unknown       | America | Resident  |           | (413)        |
| Fringillidae | Thraupini       | Sicalis      | raimondii       | Unknown       | America | Resident  |           | (413)        |
| Fringillidae | Thraupini       | Sicalis      | taczanowskii    | Unknown       | America | Resident  |           | (413)        |
| Fringillidae | Thraupini       | Emberizoides | herbicola       | Pair          | America | Resident  | 2         | (234, 466)   |
| Fringillidae | Thraupini       | Emberizoides | duidae          | Unknown       | America | Resident  |           | (234)        |
| Fringillidae | Thraupini       | Emberizoides | ypiranganus     | Unknown       | America | Resident  |           | (119)        |
| Fringillidae | Thraupini       | Embernagra   | platensis       | Unknown       | America | Resident  |           | (156)        |
| Fringillidae | Thraupini       | Embernagra   | longicauda      | Unknown       | America | Resident  |           | (413)        |
| Fringillidae | Thraupini       | Volatinia    | jacarina        | Pair          | America | Nomadic   | 2         | (11, 73)     |
| Fringillidae | Thraupini       | Sporophila   | frontalis       | Unknown       | America | Resident  |           | (93)         |
| Fringillidae | Thraupini       | Sporophila   | falcistrostris  | Unknown       | America | Nomadic   |           | (93)         |
| Fringillidae | Thraupini       | Sporophila   | schistacea      | Uniparental   | America | Nomadic   | 3         | (234)        |
| Fringillidae | Thraupini       | Sporophila   | intermedia      | Unknown       | America | Resident  | 2         | (234)        |
| Fringillidae | Thraupini       | Sporophila   | plumbea         | Unknown       | America | Partial   |           | (234)        |
| Fringillidae | Thraupini       | Sporophila   | americana       | Pair          | America | Resident  | 2         | (466)        |
| Fringillidae | Thraupini       | Sporophila   | torqueola       | Pair          | America | Resident  | 2         | (139)        |
| Fringillidae | Thraupini       | Sporophila   | collaris        | Unknown       | America | Resident  |           | (413)        |
| Fringillidae | Thraupini       | Sporophila   | bouvronides     | Pair          | America | Partial   | 2         | (234)        |
| Fringillidae | Thraupini       | Sporophila   | lineola         | Unknown       | America | Partial   |           | (234)        |
| Fringillidae | Thraupini       | Sporophila   | luctuosa        | Pair          | America | Nomadic   |           | (234)        |
| Fringillidae | Thraupini       | Sporophila   | nigricollis     | Pair          | America | Nomadic   | 2         | (466)        |
| Fringillidae | Thraupini       | Sporophila   | ardesiaca       | Unknown       | America | Resident  |           | (413)        |
| Fringillidae | Thraupini       | Sporophila   | melanops        | Unknown       | America | Resident  |           | (93)         |
| Fringillidae | Thraupini       | Sporophila   | caerulescens    | Unknown       | America | Partial   |           | (73, 235)    |
| Fringillidae | Thraupini       | Sporophila   | albugularis     | Unknown       | America | Resident  |           | (413)        |
| Fringillidae | Thraupini       | Sporophila   | leucoptera      | Unknown       | America | Resident  |           | (413)        |
| Fringillidae | Thraupini       | Sporophila   | peruviana       | Unknown       | America | Resident  |           | (413)        |
| Fringillidae | Thraupini       | Sporophila   | simplex         | Unknown       | America | Resident  |           | (413)        |
| Fringillidae | Thraupini       | Sporophila   | nigrorufa       | Unknown       | America | Migration |           | (93)         |
| Fringillidae | Thraupini       | Sporophila   | bouvreuil       | Unknown       | America | Partial   |           | (413)        |
| Fringillidae | Thraupini       | Sporophila   | minuta          | Unknown       | America | Nomadic   | 2         | (466)        |
| Fringillidae | Thraupini       | Sporophila   | hypoxantha      | Unknown       | America | Partial   |           | (73, 413)    |
| Fringillidae | Thraupini       | Sporophila   | ruficollis      | Unknown       | America | Partial   |           | (73, 413)    |
| Fringillidae | Thraupini       | Sporophila   | palustris       | Unknown       | America | Migration | 2         | (93)         |
| Fringillidae | Thraupini       | Sporophila   | castaneiventris | Pair          | America | Resident  | 2         | (234)        |
| Fringillidae | Thraupini       | Sporophila   | hypochroma      | Unknown       | America | Migration |           | (93)         |
| Fringillidae | Thraupini       | Sporophila   | cinnamomea      | Unknown       | America | Migration |           | (46, 73)     |
| Fringillidae | Thraupini       | Sporophila   | zelichi         | Unknown       | America | Migration |           | (46, 73, 93) |
| Fringillidae | Thraupini       | Sporophila   | melanogaster    | Unknown       | America | Partial   |           | (413)        |
| Fringillidae | Thraupini       | Sporophila   | telasco         | Unknown       | America | Resident  | 2         | (235)        |
| Fringillidae | Thraupini       | Sporophila   | insulata        | Unknown       | America | Resident  |           | (93)         |
| Fringillidae | Thraupini       | Oryzoborus   | nuttingi        | Pair          | America | Nomadic   | 2         | (466)        |
| Fringillidae | Thraupini       | Oryzoborus   | crassirostris   | Unknown       | America | Resident  | 2         | (234)        |
| Fringillidae | Thraupini       | Oryzoborus   | atrirostris     | Unknown       | America | Resident  |           | (413)        |
| Fringillidae | Thraupini       | Oryzoborus   | maximiliani     | Unknown       | America | Resident  |           | (234)        |
| Fringillidae | Thraupini       | Oryzoborus   | angolensis      | Pair          | America | Partial   | 2         | (466)        |
| Fringillidae | Thraupini       | Amaurospiza  | concolor        | Unknown       | America | Resident  |           | (466)        |
| Fringillidae | Thraupini       | Amaurospiza  | moesta          | Unknown       | America | Resident  |           | (413)        |
| Fringillidae | Thraupini       | Melopyrrha   | nigra           | Unknown       | America | Resident  | Endemic 3 | (406)        |
| Fringillidae | Thraupini       | Dolospingus  | fringilloides   | Unknown       | America | Resident  |           | (362)        |

| Family       | Clade Reference | Genus          | species        | Parental care | Region   | Movement  | Island  | Clutch       |
|--------------|-----------------|----------------|----------------|---------------|----------|-----------|---------|--------------|
| Fringillidae | Thraupini       | Catamenia      | analis         | Unknown       | America  | Partial   |         | (73, 235)    |
| Fringillidae | Thraupini       | Catamenia      | inomata        | Pair          | America  | Nomadic   |         | (234)        |
| Fringillidae | Thraupini       | Catamenia      | homochroa      | Unknown       | America  | Resident  |         | (234)        |
| Fringillidae | Thraupini       | Tiaris         | obscura        | Unknown       | America  | Resident  |         | (234)        |
| Fringillidae | Thraupini       | Tiaris         | canora         | Pair          | America  | Resident  | Endemic | 2 (406)      |
| Fringillidae | Thraupini       | Tiaris         | olivacea       | Pair          | America  | Resident  |         | 3 (466)      |
| Fringillidae | Thraupini       | Tiaris         | bicolor        | Unknown       | America  | Resident  |         | 2 (234)      |
| Fringillidae | Thraupini       | Tiaris         | fuliginosa     | Unknown       | America  | Resident  |         | 3 (234)      |
| Fringillidae | Thraupini       | Loxipasser     | anoxanthus     | Pair          | America  | Resident  | Endemic | 3 (406)      |
| Fringillidae | Thraupini       | Loxigilla      | portoricensis  | Unknown       | America  | Resident  | Endemic | 3 (375, 406) |
| Fringillidae | Thraupini       | Loxigilla      | violacea       | Unknown       | America  | Resident  | Endemic | 3 (406)      |
| Fringillidae | Thraupini       | Loxigilla      | noctis         | Unknown       | America  | Resident  | Endemic | 3 (406)      |
| Fringillidae | Thraupini       | Diglossa       | baritula       | Pair          | America  | Resident  |         | (255)        |
| Fringillidae | Thraupini       | Diglossa       | plumbea        | Pair          | America  | Resident  |         | 2 (255)      |
| Fringillidae | Thraupini       | Diglossa       | sittoides      | Unknown       | America  | Resident  |         | 2 (255)      |
| Fringillidae | Thraupini       | Diglossa       | venezuelensis  | Unknown       | America  | Resident  |         | (93)         |
| Fringillidae | Thraupini       | Diglossa       | albilatera     | Unknown       | America  | Resident  |         | 2 (255)      |
| Fringillidae | Thraupini       | Diglossa       | gloriosissima  | Unknown       | America  | Resident  |         | (46)         |
| Fringillidae | Thraupini       | Diglossa       | lafresnayii    | Unknown       | America  | Resident  |         | (255)        |
| Fringillidae | Thraupini       | Diglossa       | mystacalis     | Unknown       | America  | Resident  |         | 2 (255)      |
| Fringillidae | Thraupini       | Diglossa       | gloriosa       | Unknown       | America  | Resident  |         | (255)        |
| Fringillidae | Thraupini       | Diglossa       | humeralis      | Pair          | America  | Resident  |         | 2 (255)      |
| Fringillidae | Thraupini       | Diglossa       | brunneiventris | Unknown       | America  | Resident  |         | (255)        |
| Fringillidae | Thraupini       | Diglossa       | carbonaria     | Unknown       | America  | Resident  |         | (255)        |
| Fringillidae | Thraupini       | Diglossa       | duidae         | Unknown       | America  | Resident  |         | (255)        |
| Fringillidae | Thraupini       | Diglossa       | major          | Unknown       | America  | Resident  |         | (255)        |
| Fringillidae | Thraupini       | Diglossopsis   | indigotica     | Unknown       | America  | Resident  |         | (255)        |
| Fringillidae | Thraupini       | Diglossopsis   | glauca         | Unknown       | America  | Resident  |         | (255)        |
| Fringillidae | Thraupini       | Diglossopsis   | caerulescens   | Unknown       | America  | Resident  |         | 2 (255)      |
| Fringillidae | Thraupini       | Diglossopsis   | cyanea         | Unknown       | America  | Resident  |         | (255)        |
| Fringillidae | Thraupini       | Euneornis      | campestris     | Unknown       | America  | Resident  | Endemic | 4 (255)      |
| Fringillidae | Thraupini       | Melanospiza    | richardsoni    | Pair          | America  | Resident  | Endemic | (488)        |
| Fringillidae | Thraupini       | Geospiza       | magnirostris   | Pair          | America  | Resident  | Endemic | 4 (194)      |
| Fringillidae | Thraupini       | Geospiza       | fortis         | Cooperation   | America  | Resident  | Endemic | (400)        |
| Fringillidae | Thraupini       | Geospiza       | fuliginosa     | Pair          | America  | Resident  | Endemic | 3 (127)      |
| Fringillidae | Thraupini       | Geospiza       | difficilis     | Pair          | America  | Resident  | Endemic | (194)        |
| Fringillidae | Thraupini       | Geospiza       | scandens       | Cooperation   | America  | Resident  | Endemic | (400)        |
| Fringillidae | Thraupini       | Geospiza       | conirostris    | Pair          | America  | Resident  | Endemic | 3 (127)      |
| Fringillidae | Thraupini       | Camarhynchus   | crassirostris  | Pair          | America  | Resident  | Endemic | (193)        |
| Fringillidae | Thraupini       | Camarhynchus   | psittacula     | Pair          | America  | Resident  | Endemic | (193)        |
| Fringillidae | Thraupini       | Camarhynchus   | pauper         | Pair          | America  | Resident  | Endemic | (193)        |
| Fringillidae | Thraupini       | Camarhynchus   | parvulus       | Pair          | America  | Resident  | Endemic | (193)        |
| Fringillidae | Thraupini       | Camarhynchus   | pallidus       | Pair          | America  | Resident  | Endemic | (193)        |
| Fringillidae | Thraupini       | Camarhynchus   | heliobates     | Pair          | America  | Resident  | Endemic | (193)        |
| Fringillidae | Thraupini       | Certhidea      | olivacea       | Pair          | America  | Resident  | Endemic | 3 (194)      |
| Fringillidae | Thraupini       | Pinaroloxias   | inomata        | Pair          | America  | Resident  | Endemic | 2 (466)      |
| Fringillidae | Cardinalini     | Spiza          | americana      | Uniparental   | Nearctic | Migration |         | (325)        |
| Fringillidae | Cardinalini     | Pheucticus     | chrysopeplus   | Unknown       | America  | Resident  |         | 3 (235)      |
| Fringillidae | Cardinalini     | Pheucticus     | chrysogaster   | Unknown       | America  | Resident  |         | (234)        |
| Fringillidae | Cardinalini     | Pheucticus     | tibialis       | Pair          | America  | Resident  |         | 2 (466)      |
| Fringillidae | Cardinalini     | Pheucticus     | aureoventris   | Pair          | America  | Partial   |         | (73, 413)    |
| Fringillidae | Cardinalini     | Pheucticus     | ludovicianus   | Pair          | Nearctic | Migration |         | (166)        |
| Fringillidae | Cardinalini     | Pheucticus     | melanocephalus | Pair          | Nearctic | Partial   |         | (233)        |
| Fringillidae | Cardinalini     | Cardinalis     | cardinalis     | Occasional    | Nearctic | Resident  |         | (212)        |
| Fringillidae | Cardinalini     | Cardinalis     | phoeniceus     | Unknown       | America  | Resident  |         | (235)        |
| Fringillidae | Cardinalini     | Cardinalis     | sinuatus       | Pair          | America  | Resident  |         | 3 (493)      |
| Fringillidae | Cardinalini     | Caryothraustes | poliogaster    | Cooperation   | America  | Resident  |         | 3 (344, 455) |
| Fringillidae | Cardinalini     | Caryothraustes | canadensis     | Unknown       | America  | Resident  |         | (50)         |
| Fringillidae | Cardinalini     | Caryothraustes | humeralis      | Unknown       | America  | Resident  |         | (235)        |
| Fringillidae | Cardinalini     | Rhodothraupis  | celaeno        | Unknown       | America  | Resident  |         | 2 (239)      |
| Fringillidae | Cardinalini     | Periporphyrus  | erythromelas   | Unknown       | America  | Resident  |         | (234)        |
| Fringillidae | Cardinalini     | Pitylus        | grossus        | Pair          | America  | Resident  |         | (234)        |
| Fringillidae | Cardinalini     | Pitylus        | fuliginosus    | Unknown       | America  | Resident  |         | (413)        |
| Fringillidae | Cardinalini     | Saltator       | atriceps       | Unknown       | America  | Resident  |         | (239)        |
| Fringillidae | Cardinalini     | Saltator       | maximus        | Pair          | America  | Resident  |         | 2 (234, 453) |
| Fringillidae | Cardinalini     | Saltator       | atripennis     | Unknown       | America  | Resident  |         | (235)        |
| Fringillidae | Cardinalini     | Saltator       | coerulescens   | Cooperation   | America  | Resident  |         | 2 (234)      |
| Fringillidae | Cardinalini     | Saltator       | similis        | Unknown       | America  | Resident  |         | (413)        |
| Fringillidae | Cardinalini     | Saltator       | orenocensis    | Suspected     | America  | Resident  |         | 2 (235)      |
| Fringillidae | Cardinalini     | Saltator       | nigriceps      | Unknown       | America  | Resident  |         | (413)        |
| Fringillidae | Cardinalini     | Saltator       | aurantiostrius | Unknown       | America  | Resident  |         | (156)        |
| Fringillidae | Cardinalini     | Saltator       | maxillosus     | Unknown       | America  | Resident  |         | (413)        |
| Fringillidae | Cardinalini     | Saltator       | cinctus        | Unknown       | America  | Nomadic   |         | (487)        |

| Family       | Clade Reference | Genus          | species                  | Parental care | Region   | Movement  | Island    | Clutch     |
|--------------|-----------------|----------------|--------------------------|---------------|----------|-----------|-----------|------------|
| Fringillidae | Cardinalini     | Saltator       | atricollis               | Cooperation   | America  | Resident  |           | (408)      |
| Fringillidae | Cardinalini     | Saltator       | rufiventris              | Unknown       | America  | Resident  |           | (93)       |
| Fringillidae | Cardinalini     | Saltator       | albicollis               | Pair          | America  | Resident  | 2         | (453)      |
| Fringillidae | Cardinalini     | Cyanoloxia     | glaucocaerulea           | Unknown       | America  | Partial   |           | (413)      |
| Fringillidae | Cardinalini     | Cyanocompsa    | cyanooides               | Pair          | America  | Resident  | 2         | (466)      |
| Fringillidae | Cardinalini     | Cyanocompsa    | parellina                | Unknown       | America  | Resident  | 2         | (239)      |
| Fringillidae | Cardinalini     | Cyanocompsa    | brissonii                | Unknown       | America  | Resident  |           | (234)      |
| Fringillidae | Cardinalini     | Guiraca        | caerulea                 | Pair          | America  | Partial   | 4         | (248)      |
| Fringillidae | Cardinalini     | Passerina      | amoena                   | Pair          | Nearctic | Migration | 3         | (196)      |
| Fringillidae | Cardinalini     | Passerina      | cyanea                   | Pair          | Nearctic | Migration | 3         | (385)      |
| Fringillidae | Cardinalini     | Passerina      | versicolor               | Pair          | Nearctic | Migration | 4         | (203)      |
| Fringillidae | Cardinalini     | Passerina      | ciris                    | Pair          | Nearctic | Migration | 3         | (311)      |
| Fringillidae | Cardinalini     | Passerina      | rositae                  | Unknown       | America  | Resident  |           | (239)      |
| Fringillidae | Cardinalini     | Passerina      | leclancherii             | Unknown       | America  | Resident  |           | (239)      |
| Fringillidae | Cardinalini     | Porphyrospiza  | caerulescens             | Unknown       | America  | Resident  |           | (413)      |
| Fringillidae | Icterini        | a. Amblycercus | Amblycercus holosericeus |               | Unknown  | America   | Resident  | 2 (260)    |
| Fringillidae | Icterini        | b. oropendolas | P. oseryi                | Pair          | America  | Resident  |           | (260)      |
| Fringillidae | Icterini        | b. oropendolas | P. decumanus             | Unknown       | America  | Partial   |           | (260)      |
| Fringillidae | Icterini        | b. oropendolas | P. viridis               | Uniparental   | America  | Resident  |           | (260)      |
| Fringillidae | Icterini        | b. oropendolas | P. atrovirens            | Unknown       | America  | Resident  |           | (260)      |
| Fringillidae | Icterini        | b. oropendolas | P. angustifrons          | Uniparental   | America  | Resident  | 2         | (260)      |
| Fringillidae | Icterini        | b. oropendolas | P. wagleri               | Uniparental   | America  | Resident  | 2         | (260)      |
| Fringillidae | Icterini        | b. oropendolas | O. latirostris           | Unknown       | America  | Resident  |           | (260)      |
| Fringillidae | Icterini        | b. oropendolas | G. montezuma             | Uniparental   | America  | Resident  | 2         | (260)      |
| Fringillidae | Icterini        | b. oropendolas | G. cassini               | Unknown       | America  | Resident  |           | (260)      |
| Fringillidae | Icterini        | b. oropendolas | G. bifasciatus           | Unknown       | America  | Resident  |           | (260)      |
| Fringillidae | Icterini        | b. oropendolas | G. guatimozinus          | Unknown       | America  | Resident  |           | (260)      |
| Fringillidae | Icterini        | b. oropendolas | C. cela                  | Uniparental   | America  | Resident  | 2         | (260)      |
| Fringillidae | Icterini        | b. oropendolas | C. haemorrhous           | Uniparental   | America  | Resident  | 2         | (260)      |
| Fringillidae | Icterini        | b. oropendolas | C. uropygialis           | Pair          | America  | Resident  |           | (260)      |
| Fringillidae | Icterini        | b. oropendolas | C. koepckeae             | Unknown       | America  | Resident  |           | (260)      |
| Fringillidae | Icterini        | b. oropendolas | C. chrysopterus          | Unknown       | America  | Resident  | 3         | (260)      |
| Fringillidae | Icterini        | b. oropendolas | C. chrysonotus           | Unknown       | America  | Resident  |           | (260)      |
| Fringillidae | Icterini        | b. oropendolas | C. sclateri              | Unknown       | America  | Resident  |           | (260)      |
| Fringillidae | Icterini        | b. oropendolas | C. solitarius            | Unknown       | America  | Resident  | 2         | (260)      |
| Fringillidae | Icterini        | b. oropendolas | C. melanicterus          | Unknown       | America  | Resident  | 3         | (260)      |
| Fringillidae | Icterini        | c. orioles     | I. chrysocephalus        | Pair          | America  | Resident  | 2         | (260)      |
| Fringillidae | Icterini        | c. orioles     | I. cayanensis            | Pair          | America  | Resident  | 2         | (260)      |
| Fringillidae | Icterini        | c. orioles     | I. chrysater             | Unknown       | America  | Partial   | 2         | (260)      |
| Fringillidae | Icterini        | c. orioles     | I. nigrogularis          | Pair          | America  | Resident  | 3         | (260)      |
| Fringillidae | Icterini        | c. orioles     | I. leucopteryx           | Pair          | America  | Resident  | Endemic 4 | (260)      |
| Fringillidae | Icterini        | c. orioles     | I. auratus               | Unknown       | America  | Resident  |           | (260)      |
| Fringillidae | Icterini        | c. orioles     | I. mesomelas             | Pair          | America  | Resident  | 2         | (260)      |
| Fringillidae | Icterini        | c. orioles     | I. auricapillus          | Unknown       | America  | Resident  |           | (260)      |
| Fringillidae | Icterini        | c. orioles     | I. graceannae            | Unknown       | America  | Resident  |           | (260)      |
| Fringillidae | Icterini        | c. orioles     | I. pectoralis            | Pair          | America  | Resident  | 3         | (260)      |
| Fringillidae | Icterini        | c. orioles     | I. gularis               | Pair          | America  | Resident  | 4         | (260)      |
| Fringillidae | Icterini        | c. orioles     | I. pustulatus            | Pair          | America  | Partial   | 3         | (260)      |
| Fringillidae | Icterini        | c. orioles     | I. cucullatus            | Pair          | America  | Migration | 4         | (260)      |
| Fringillidae | Icterini        | c. orioles     | I. icterus               | Pair          | America  | Resident  | 3         | (260)      |
| Fringillidae | Icterini        | c. orioles     | I. jamacaii              | Unknown       | America  | Resident  |           | (260)      |
| Fringillidae | Icterini        | c. orioles     | I. galbula               | Suspected     | Nearctic | Migration | 5         | (415, 416) |
| Fringillidae | Icterini        | c. orioles     | I. spurius               | Occasional    | Nearctic | Migration | 4         | (441)      |
| Fringillidae | Icterini        | c. orioles     | I. wagleri               | Unknown       | America  | Resident  | 3         | (260)      |
| Fringillidae | Icterini        | c. orioles     | I. dominicensis          | Pair          | America  | Resident  | 3         | (260)      |
| Fringillidae | Icterini        | c. orioles     | I. oberi                 | Pair          | America  | Resident  | Endemic 2 | (260)      |
| Fringillidae | Icterini        | c. orioles     | I. bonana                | Unknown       | America  | Resident  | Endemic 3 | (260)      |
| Fringillidae | Icterini        | c. orioles     | I. laudabilis            | Unknown       | America  | Resident  | Endemic   | (260)      |
| Fringillidae | Icterini        | c. orioles     | I. graduacauda           | Pair          | America  | Resident  | 4         | (260)      |
| Fringillidae | Icterini        | c. orioles     | I. maculialatus          | Unknown       | America  | Nomadic   |           | (260)      |
| Fringillidae | Icterini        | c. orioles     | I. parisorum             | Pair          | Nearctic | Migration | 3         | (260)      |
| Fringillidae | Icterini        | d. meadowlarks | D. oryzivorus            | Cooperation   | America  | Migration | 5         | (40)       |
| Fringillidae | Icterini        | d. meadowlarks | L. militaris             | Unknown       | America  | Partial   | 3         | (260)      |
| Fringillidae | Icterini        | d. meadowlarks | L. superciliaris         | Unknown       | America  | Partial   | 4         | (260)      |
| Fringillidae | Icterini        | d. meadowlarks | S. bellicosa             | Unknown       | America  | Nomadic   | 4         | (260)      |
| Fringillidae | Icterini        | d. meadowlarks | S. militaris             | Pair          | America  | Partial   | 4         | (260)      |
| Fringillidae | Icterini        | d. meadowlarks | S. loyca                 | Pair          | America  | Partial   | 4         | (260)      |
| Fringillidae | Icterini        | d. meadowlarks | S. magna                 | Pair          | Nearctic | Partial   | 5         | (260)      |
| Fringillidae | Icterini        | d. meadowlarks | S. lillianae             | Unknown       | Nearctic | Resident  |           | (260)      |
| Fringillidae | Icterini        | d. meadowlarks | S. neglecta              | Pair          | Nearctic | Migration | 4         | (260)      |
| Fringillidae | Icterini        | d. meadowlarks | X. xanthocephalus        | Pair          | Nearctic | Migration | 4         | (260)      |
| Fringillidae | Icterini        | e. Nesopsar    | nigerrimus               | Pair          | America  | Resident  | Endemic 2 | (260)      |
| Fringillidae | Icterini        | f. Dives       | atroviolacea             | Unknown       | America  | Nomadic   | Endemic 3 | (260)      |

| Family       | Clade Reference | Genus         | species           | Parental care  | Region     | Movement  | Island  | Clutch       |
|--------------|-----------------|---------------|-------------------|----------------|------------|-----------|---------|--------------|
| Fringillidae | Icterini        | f. Dives      | dives             | Pair           | America    | Resident  |         | 3 (260)      |
| Fringillidae | Icterini        | f. Dives      | warszewiczii      | Unknown        | America    | Resident  |         | (260)        |
| Fringillidae | Icterini        | g. grackle A  | G.mexicanus       | Pair           | America    | Resident  |         | 3 (260)      |
| Fringillidae | Icterini        | g. grackle A  | L.tanagrinus      | Unknown        | America    | Resident  |         | (260)        |
| Fringillidae | Icterini        | g. grackle A  | M.imthurni        | Cooperation    | America    | Resident  |         | 3 (260)      |
| Fringillidae | Icterini        | g. grackle A  | M.subalaris       | Unknown        | America    | Resident  |         | (260)        |
| Fringillidae | Icterini        | g. grackle A  | A.xanthophthalmus | Unknown        | America    | Resident  |         | (260)        |
| Fringillidae | Icterini        | g. grackle A  | A.cyanopus        | Unknown        | America    | Resident  |         | 3 (260)      |
| Fringillidae | Icterini        | g. grackle A  | A.icterocephalus  | Pair           | America    | Resident  |         | 2 (260)      |
| Fringillidae | Icterini        | g. grackle A  | A.ruficapillus    | Unknown        | America    | Migration |         | 3 (260)      |
| Fringillidae | Icterini        | g. grackle A  | A.thilius         | Pair           | America    | Partial   |         | 3 (260)      |
| Fringillidae | Icterini        | g. grackle A  | Ag. badius        | Cooperation    | America    | Resident  |         | 4 (164, 308) |
| Fringillidae | Icterini        | g. grackle A  | Ag.bolivianus     | Cooperation    | America    | Resident  |         | 3 (308, 378) |
| Fringillidae | Icterini        | g. grackle A  | Am. holosericeus  | Pair           | America    | Resident  |         | 3 (260)      |
| Fringillidae | Icterini        | g. grackle A  | C.curaeus         | Cooperation    | America    | Resident  |         | 4 (379)      |
| Fringillidae | Icterini        | g. grackle A  | C.forbesi         | Cooperation    | America    | Resident  |         | 3 (472)      |
| Fringillidae | Icterini        | g. grackle A  | G.chopi           | Unknown        | America    | Nomadic   |         | 4 (260)      |
| Fringillidae | Icterini        | g. grackle A  | H.pyrohypogaster  | Cooperation    | America    | Resident  |         | 2 (260)      |
| Fringillidae | Icterini        | g. grackle A  | P.guirahuro       | Unknown        | America    | Resident  |         | 3 (260)      |
| Fringillidae | Icterini        | g. grackle A  | P.virescens       | Cooperation    | America    | Resident  |         | 4 (379)      |
| Fringillidae | Icterini        | g. grackle A  | X.flavus          | Unknown        | America    | Nomadic   |         | 4 (260)      |
| Fringillidae | Icterini        | h. grackle B  | Q. mexicanus      | Uniparental    | America    | Partial   |         | 3 (260)      |
| Fringillidae | Icterini        | h. grackle B  | Q. major          | Uniparental    | Nearctic   | Partial   |         | 4 (260)      |
| Fringillidae | Icterini        | h. grackle B  | Q. palustris      | Unknown        | America    | Resident  |         | (260)        |
| Fringillidae | Icterini        | h. grackle B  | Q.nicaraguensis   | Pair           | America    | Resident  |         | 2 (260)      |
| Fringillidae | Icterini        | h. grackle B  | Q.quiscula        | Pair           | Nearctic   | Partial   |         | 4 (260)      |
| Fringillidae | Icterini        | h. grackle B  | Q.niger           | Pair           | America    | Resident  | Endemic | 4 (260)      |
| Fringillidae | Icterini        | h. grackle B  | Q.lugubris        | Pair           | America    | Resident  |         | 3 (260)      |
| Fringillidae | Icterini        | i. Blackbirds | E.carolinus       | Pair           | Nearctic   | Migration |         | 4 (260)      |
| Fringillidae | Icterini        | i. Blackbirds | E.cyanocephalus   | Pair           | Nearctic   | Partial   |         | 5 (260)      |
| Fringillidae | Icterini        | i. Blackbirds | A.phoeniceus      | Pair           | Nearctic   | Partial   |         | 3 (260)      |
| Fringillidae | Icterini        | i. Blackbirds | A.tricolor        | Pair           | Nearctic   | Partial   |         | 4 (260)      |
| Fringillidae | Icterini        | i. Blackbirds | A.humeralis       | Pair           | America    | Resident  | Endemic | 4 (260)      |
| Fringillidae | Icterini        | i. Blackbirds | A.xanthomus       | Pair           | America    | Resident  | Endemic | 3 (260)      |
| Fringillidae | Icterini        | j. Cowbirds   | M.rufoaxillaris   | Brood parasite | America    | Resident  |         | (260)        |
| Fringillidae | Icterini        | j. Cowbirds   | M.bonariensis     | Brood parasite | America    | Partial   |         | (260)        |
| Fringillidae | Icterini        | j. Cowbirds   | M.aeneus          | Brood parasite | Nearctic   | Partial   |         | (260)        |
| Fringillidae | Icterini        | j. Cowbirds   | M.ater            | Brood parasite | Nearctic   | Migration |         | (260)        |
| Fringillidae | Icterini        | j. Cowbirds   | M.oryzivora       | Brood parasite | America    | Resident  |         | (260)        |
| Passeridae   | Motacillinae    | Dendronanthus | indicus           | Pair           | Palearctic | Migration |         | 4 (52)       |
| Passeridae   | Motacillinae    | Motacilla     | alba              | Pair           | Palearctic | Partial   |         | 5 (103)      |
| Passeridae   | Motacillinae    | Motacilla     | lugens            | Pair           | Nearctic   | Migration |         | 5 (24)       |
| Passeridae   | Motacillinae    | Motacilla     | grandis           | Pair           | Palearctic | Resident  |         | 5 (358)      |
| Passeridae   | Motacillinae    | Motacilla     | madaraspatensis   | Pair           | se Asia    | Resident  |         | 4 (9)        |
| Passeridae   | Motacillinae    | Motacilla     | aguimp            | Pair           | Africa     | Nomadic   |         | 3 (269)      |
| Passeridae   | Motacillinae    | Motacilla     | capensis          | Occasional     | Africa     | Partial   |         | 3 (201)      |
| Passeridae   | Motacillinae    | Motacilla     | flaviventris      | Unknown        | Africa     | Partial   |         | 2 (284)      |
| Passeridae   | Motacillinae    | Motacilla     | citreola          | Pair           | Palearctic | Migration |         | 5 (103)      |
| Passeridae   | Motacillinae    | Motacilla     | flava             | Pair           | Palearctic | Migration |         | 5 (103)      |
| Passeridae   | Motacillinae    | Motacilla     | cinerea           | Occasional     | Palearctic | Partial   |         | 5 (103)      |
| Passeridae   | Motacillinae    | Motacilla     | clara             | Pair           | Africa     | Nomadic   |         | 2 (269)      |
| Passeridae   | Motacillinae    | Tmetothylacus | tenellus          | Pair           | Africa     | Nomadic   |         | 3 (269)      |
| Passeridae   | Motacillinae    | Macronyx      | croceus           | Pair           | Africa     | Resident  |         | 3 (269)      |
| Passeridae   | Motacillinae    | Macronyx      | fuellebornii      | Pair           | Africa     | Resident  |         | 3 (269)      |
| Passeridae   | Motacillinae    | Macronyx      | capensis          | Pair           | Africa     | Resident  |         | 3 (269)      |
| Passeridae   | Motacillinae    | Macronyx      | flavicollis       | Unknown        | Africa     | Resident  |         | 3 (269)      |
| Passeridae   | Motacillinae    | Macronyx      | ameliae           | Pair           | Africa     | Resident  |         | 3 (269)      |
| Passeridae   | Motacillinae    | Macronyx      | aurantigula       | Pair           | Africa     | Resident  |         | 3 (269)      |
| Passeridae   | Motacillinae    | Macronyx      | grimwoodi         | Unknown        | Africa     | Resident  |         | (269)        |
| Passeridae   | Motacillinae    | Anthus        | sharpei           | Pair           | Africa     | Resident  |         | 2 (269)      |
| Passeridae   | Motacillinae    | Anthus        | chloris           | Pair           | Africa     | Partial   |         | 3 (269)      |
| Passeridae   | Motacillinae    | Anthus        | lineiventris      | Pair           | Africa     | Resident  |         | 3 (269)      |
| Passeridae   | Motacillinae    | Anthus        | crenatus          | Pair           | Africa     | Resident  |         | 3 (269)      |
| Passeridae   | Motacillinae    | Anthus        | cinnamomeus       | Unknown        | Africa     | Resident  |         | (269)        |
| Passeridae   | Motacillinae    | Anthus        | camaroonensis     | Unknown        | Africa     | Resident  |         | (269)        |
| Passeridae   | Motacillinae    | Anthus        | hoeschi           | Pair           | Africa     | Migration |         | 3 (269)      |
| Passeridae   | Motacillinae    | Anthus        | richardi          | Pair           | Widespread |           | Partial | 3 (269)      |
| Passeridae   | Motacillinae    | Anthus        | rufulus           | Pair           | se Asia    | Resident  |         | 3 (9)        |
| Passeridae   | Motacillinae    | Anthus        | novaeeseelandiae  | Pair           | Australia  | Partial   |         | (47)         |
| Passeridae   | Motacillinae    | Anthus        | leucophrys        | Pair           | Africa     | Nomadic   |         | 3 (269)      |
| Passeridae   | Motacillinae    | Anthus        | vaalensis         | Unknown        | Africa     | Nomadic   |         | 2 (269)      |
| Passeridae   | Motacillinae    | Anthus        | pallidiventris    | Unknown        | Africa     | Resident  |         | (269)        |
| Passeridae   | Motacillinae    | Anthus        | melindae          | Pair           | Africa     | Resident  |         | 2 (269)      |

| Family     | Clade Reference | Genus          | species        | Parental care | Region      | Movement    | Island  | Clutch       |
|------------|-----------------|----------------|----------------|---------------|-------------|-------------|---------|--------------|
| Passeridae | Motacillinae    | Anthus         | campestris     | Pair          | Palaearctic | Migration   |         | 4 (103)      |
| Passeridae | Motacillinae    | Anthus         | godlewskii     | Unknown       | Africa      | Resident    |         | (269)        |
| Passeridae | Motacillinae    | Anthus         | berthelotii    | Unknown       | Palaearctic | Resident    | Endemic | 4 (103)      |
| Passeridae | Motacillinae    | Anthus         | bannermani     | Unknown       | Africa      | Resident    |         | (269)        |
| Passeridae | Motacillinae    | Anthus         | latistriatus   | Unknown       | Africa      | Migration   |         | (269)        |
| Passeridae | Motacillinae    | Anthus         | similis        | Unknown       | Palaearctic | Partial     |         | 3 (103)      |
| Passeridae | Motacillinae    | Anthus         | nyassae        | Unknown       | Africa      | Resident    |         | (269)        |
| Passeridae | Motacillinae    | Anthus         | brachyurus     | Unknown       | Africa      | Partial     |         | 2 (269)      |
| Passeridae | Motacillinae    | Anthus         | caffer         | Unknown       | Africa      | Nomadic     |         | 3 (269)      |
| Passeridae | Motacillinae    | Anthus         | sokokensis     | Unknown       | Africa      | Resident    |         | (269)        |
| Passeridae | Motacillinae    | Anthus         | trivialis      | Occasional    | Palaearctic | Migration   |         | 5 (103)      |
| Passeridae | Motacillinae    | Anthus         | hodgsoni       | Pair          | Palaearctic | Migration   |         | 4 (103)      |
| Passeridae | Motacillinae    | Anthus         | gustavi        | Pair          | Palaearctic | Migration   |         | 5 (103)      |
| Passeridae | Motacillinae    | Anthus         | pratensis      | Occasional    | Palaearctic | Partial     |         | 5 (103)      |
| Passeridae | Motacillinae    | Anthus         | cervinus       | Pair          | Palaearctic | Migration   |         | 6 (103)      |
| Passeridae | Motacillinae    | Anthus         | roseatus       | Pair          | Palaearctic | Migration   |         | 4 (9)        |
| Passeridae | Motacillinae    | Anthus         | petrosus       | Pair          | Palaearctic | Partial     |         | 5 (103)      |
| Passeridae | Motacillinae    | Anthus         | spinoletta     | Pair          | Palaearctic | Partial     |         | 5 (103)      |
| Passeridae | Motacillinae    | Anthus         | nyassae        | Pair          | Nearctic    | Migration   |         | 5 (504)      |
| Passeridae | Motacillinae    | Anthus         | nyassae        | Unknown       | Palaearctic | Resident    |         | 4 (9)        |
| Passeridae | Motacillinae    | Anthus         | nilghiriensis  | Unknown       | se Asia     | Resident    |         | 2 (9)        |
| Passeridae | Motacillinae    | Anthus         | correndera     | Pair          | America     | Partial     |         | 3 (529)      |
| Passeridae | Motacillinae    | Anthus         | antarcticus    | Pair          | America     | Resident    | Endemic | (46)         |
| Passeridae | Motacillinae    | Anthus         | spragueii      | Uniparental   | Nearctic    | Migration   |         | 4 (417)      |
| Passeridae | Motacillinae    | Anthus         | furcatus       | Unknown       | America     | Resident    |         | (156)        |
| Passeridae | Motacillinae    | Anthus         | hellmayri      | Unknown       | America     | Migration   |         | (73, 156)    |
| Passeridae | Motacillinae    | Anthus         | bogotensis     | Unknown       | America     | Resident    |         | (234)        |
| Passeridae | Motacillinae    | Anthus         | lutescens      | Unknown       | America     | Resident    |         | (234)        |
| Passeridae | Motacillinae    | Anthus         | chacoensis     | Unknown       | America     | Resident    |         | (413)        |
| Passeridae | Motacillinae    | Anthus         | nattereri      | Unknown       | America     | Resident    |         | 4 (93)       |
| Passeridae | Motacillinae    | Anthus         | gutturalis     | Unknown       | Australia   | Resident    |         | no source    |
| Passeridae | Passerinae      | Passer         | ammodendri     | Pair          | Palaearctic | Resident    |         | 5 (475)      |
| Passeridae | Passerinae      | Passer         | domesticus     | Cooperation   | Holarctic   | Partial     |         | (436)        |
| Passeridae | Passerinae      | Passer         | hispaniolensis | Pair          | Palaearctic | Partial     |         | 5 (475)      |
| Passeridae | Passerinae      | Passer         | pyrrhonotus    | Pair          | se Asia     | Resident    |         | 4 (475)      |
| Passeridae | Passerinae      | Passer         | castanopterus  | Unknown       | Africa      | Resident    |         | 5 (475)      |
| Passeridae | Passerinae      | Passer         | rutilans       | Pair          | se Asia     | Altitudinal |         | 3 (10)       |
| Passeridae | Passerinae      | Passer         | flaveolus      | Pair          | se Asia     | Resident    |         | 4 (475)      |
| Passeridae | Passerinae      | Passer         | moabiticus     | Pair          | Palaearctic | Migration   |         | 4 (106)      |
| Passeridae | Passerinae      | Passer         | iagoensis      | Pair          | Africa      | Resident    | Endemic | 4 (106)      |
| Passeridae | Passerinae      | Passer         | rufocinctus    | Unknown       | Africa      | Resident    |         | (475)        |
| Passeridae | Passerinae      | Passer         | insularis      | Unknown       | Africa      | Resident    | Endemic | (475)        |
| Passeridae | Passerinae      | Passer         | motitensis     | Unknown       | Africa      | Nomadic     |         | (324)        |
| Passeridae | Passerinae      | Passer         | melanurus      | Pair          | Africa      | Nomadic     |         | 3 (324)      |
| Passeridae | Passerinae      | Passer         | griseus        | Pair          | Africa      | Resident    |         | 3 (475)      |
| Passeridae | Passerinae      | Passer         | swainsonii     | Unknown       | Africa      | Resident    |         | 4 (475)      |
| Passeridae | Passerinae      | Passer         | gongonensis    | Unknown       | Africa      | Resident    |         | 2 (475)      |
| Passeridae | Passerinae      | Passer         | suahelicus     | Unknown       | Africa      | Resident    |         | (475)        |
| Passeridae | Passerinae      | Passer         | diffusus       | Pair          | Africa      | Resident    |         | 4 (324)      |
| Passeridae | Passerinae      | Passer         | simplex        | Pair          | Africa      | Nomadic     |         | 4 (106)      |
| Passeridae | Passerinae      | Passer         | montanus       | Pair          | Palaearctic | Partial     |         | 5 (106)      |
| Passeridae | Passerinae      | Passer         | luteus         | Cooperation   | Africa      | Nomadic     |         | 4 (347, 475) |
| Passeridae | Passerinae      | Passer         | euchlorus      | Unknown       | Palaearctic | Nomadic     |         | (84)         |
| Passeridae | Passerinae      | Passer         | eminibey       | Pair          | Africa      | Resident    |         | 3 (475)      |
| Passeridae | Passerinae      | Petronia       | pyrgita        | Unknown       | Africa      | Resident    |         | (84)         |
| Passeridae | Passerinae      | Petronia       | xanthocollis   | Pair          | se Asia     | Partial     |         | 3 (84)       |
| Passeridae | Passerinae      | Petronia       | superciliaris  | Unknown       | Africa      | Resident    |         | (84)         |
| Passeridae | Passerinae      | Petronia       | dentata        | Pair          | Africa      | Partial     |         | (84)         |
| Passeridae | Passerinae      | Petronia       | petronia       | Pair          | Palaearctic | Partial     |         | 5 (106)      |
| Passeridae | Passerinae      | Carospiza      | brachydactyla  | Pair          | Palaearctic | Migration   |         | 4 (106)      |
| Passeridae | Passerinae      | Montifringilla | nivalis        | Pair          | Palaearctic | Partial     |         | 4 (106)      |
| Passeridae | Passerinae      | Montifringilla | adamsi         | Pair          | Palaearctic | Altitudinal |         | 4 (84)       |
| Passeridae | Passerinae      | Montifringilla | taczanowskii   | Unknown       | Palaearctic | Resident    |         | (84)         |
| Passeridae | Passerinae      | Montifringilla | davidiana      | Unknown       | Palaearctic | Resident    |         | (84)         |
| Passeridae | Passerinae      | Montifringilla | ruficollis     | Pair          | Palaearctic | Altitudinal |         | (84)         |
| Passeridae | Passerinae      | Montifringilla | blanfordi      | Pair          | Palaearctic | Altitudinal |         | (84)         |
| Passeridae | Passerinae      | Montifringilla | theresae       | Unknown       | Palaearctic | Altitudinal |         | (526)        |
| Passeridae | Ploceinae       | Bubalornis     | albirostris    | Suspected     | Africa      | Resident    |         | 2 (108, 201) |
| Passeridae | Ploceinae       | Bubalornis     | niger          | Cooperation   | Africa      | Resident    |         | (521)        |
| Passeridae | Ploceinae       | Dinemellia     | dinemelli      | Suspected     | Africa      | Resident    |         | (517)        |
| Passeridae | Ploceinae       | Sporopipes     | frontalis      | Unknown       | Africa      | Resident    |         | (323)        |
| Passeridae | Ploceinae       | Sporopipes     | squamifrons    | Unknown       | Africa      | Nomadic     |         | 4 (324)      |
| Passeridae | Ploceinae       | Plocepasser    | mahali         | Cooperation   | Africa      | Resident    |         | (296, 297)   |



| Family                     | Clade Reference | Genus         | species        | Parental care | Region  | Movement | Island  | Clutch       |
|----------------------------|-----------------|---------------|----------------|---------------|---------|----------|---------|--------------|
| Passeridae                 | Ploceinae       | Plocepasser   | superciliosus  | Unknown       | Africa  | Resident |         | 2 (323)      |
| Passeridae                 | Ploceinae       | Plocepasser   | rufoscapulatus | Unknown       | Africa  | Nomadic  |         | (323)        |
| Passeridae                 | Ploceinae       | Plocepasser   | donaldsoni     | Unknown       | Africa  | Resident |         | (322)        |
| Passeridae                 | Ploceinae       | Histurgops    | ruficauda      | Unknown       | Africa  | Resident |         | 3 (322)      |
| Passeridae                 | Ploceinae       | Pseudonigrita | arnaudi        | Cooperation   | Africa  | Resident |         | (43)         |
| Passeridae                 | Ploceinae       | Pseudonigrita | cabanisi       | Unknown       | Africa  | Nomadic  |         | 3 (322)      |
| Passeridae<br>(pers. comm) | Ploceinae       | Philetairus   | socius         | Cooperation   | Africa  | Resident |         | R. Covas     |
| Passeridae                 | Ploceinae       | Ploceus       | bannermani     | Pair          | Africa  | Resident |         | (46, 109)    |
| Passeridae                 | Ploceinae       | Ploceus       | batesi         | Pair          | Africa  | Resident |         | (94)         |
| Passeridae                 | Ploceinae       | Ploceus       | nigrimentum    | Unknown       | Africa  | Resident |         | (94)         |
| Passeridae                 | Ploceinae       | Ploceus       | baglafecht     | Unknown       | Africa  | Resident |         | 2 (95, 109)  |
| Passeridae                 | Ploceinae       | Ploceus       | bertrandi      | Pair          | Africa  | Resident |         | 2 (109)      |
| Passeridae                 | Ploceinae       | Ploceus       | pelzelni       | Pair          | Africa  | Resident |         | 2 (109)      |
| Passeridae                 | Ploceinae       | Ploceus       | subpersonatus  | Unknown       | Africa  | Resident |         | (94)         |
| Passeridae                 | Ploceinae       | Ploceus       | luteolus       | Pair          | Africa  | Resident |         | 2 (109)      |
| Passeridae                 | Ploceinae       | Ploceus       | intermedius    | Pair          | Africa  | Resident |         | 2 (324)      |
| Passeridae                 | Ploceinae       | Ploceus       | ocularis       | Pair          | Africa  | Resident |         | 3 (99, 324)  |
| Passeridae                 | Ploceinae       | Ploceus       | nigricollis    | Pair          | Africa  | Resident |         | 2 (109)      |
| Passeridae                 | Ploceinae       | Ploceus       | melanogaster   | Pair          | Africa  | Resident |         | 2 (109)      |
| Passeridae                 | Ploceinae       | Ploceus       | alienus        | Pair          | Africa  | Resident |         | 2 (109)      |
| Passeridae                 | Ploceinae       | Ploceus       | temporalis     | Unknown       | Africa  | Resident |         | (324)        |
| Passeridae                 | Ploceinae       | Ploceus       | capensis       | Pair          | Africa  | Resident |         | 2 (324)      |
| Passeridae                 | Ploceinae       | Ploceus       | subaureus      | Unknown       | Africa  | Resident |         | 2 (324)      |
| Passeridae                 | Ploceinae       | Ploceus       | xanthops       | Pair          | Africa  | Resident |         | 2 (324)      |
| Passeridae                 | Ploceinae       | Ploceus       | princeps       | Unknown       | Africa  | Resident | Endemic | (22)         |
| Passeridae                 | Ploceinae       | Ploceus       | aurantius      | Uniparental   | Africa  | Resident |         | 2 (322)      |
| Passeridae                 | Ploceinae       | Ploceus       | bojeri         | Unknown       | Africa  | Resident |         | 2 (322)      |
| Passeridae                 | Ploceinae       | Ploceus       | castaneiceps   | Unknown       | Africa  | Nomadic  |         | 2 (322)      |
| Passeridae                 | Ploceinae       | Ploceus       | xanthopterus   | Unknown       | Africa  | Resident |         | (218)        |
| Passeridae                 | Ploceinae       | Ploceus       | castanops      | Unknown       | Africa  | Resident |         | 2 (323)      |
| Passeridae                 | Ploceinae       | Ploceus       | burnieri       | Unknown       | Africa  | Resident |         | (27)         |
| Passeridae                 | Ploceinae       | Ploceus       | galbula        | Uniparental   | Africa  | Resident |         | 3 (4)        |
| Passeridae                 | Ploceinae       | Ploceus       | heuglini       | Uniparental   | Africa  | Resident |         | (200)        |
| Passeridae                 | Ploceinae       | Ploceus       | taeniopterus   | Uniparental   | Africa  | Resident |         | 3 (256)      |
| Passeridae                 | Ploceinae       | Ploceus       | victoriae      | Unknown       | Africa  | Resident |         | (20)         |
| Passeridae                 | Ploceinae       | Ploceus       | vitellinus     | Uniparental   | Africa  | Resident |         | 3 (323)      |
| Passeridae                 | Ploceinae       | Ploceus       | velatus        | Uniparental   | Africa  | Resident |         | 2 (324)      |
| Passeridae                 | Ploceinae       | Ploceus       | katangae       | Unknown       | Africa  | Resident |         | (324)        |
| Passeridae                 | Ploceinae       | Ploceus       | ruweti         | Unknown       | Africa  | Resident |         | (94)         |
| Passeridae                 | Ploceinae       | Ploceus       | richardi       | Unknown       | Africa  | Resident |         | (322)        |
| Passeridae                 | Ploceinae       | Ploceus       | cucullatus     | Pair          | Africa  | Resident |         | 3 (124, 324) |
| Passeridae                 | Ploceinae       | Ploceus       | grandis        | Unknown       | Africa  | Resident | Endemic | (22)         |
| Passeridae                 | Ploceinae       | Ploceus       | spekei         | Unknown       | Africa  | Nomadic  |         | 2 (322)      |
| Passeridae                 | Ploceinae       | Ploceus       | spekeoides     | Unknown       | Africa  | Resident |         | (322)        |
| Passeridae                 | Ploceinae       | Ploceus       | nigerrimus     | Uniparental   | Africa  | Resident |         | 2 (124)      |
| Passeridae                 | Ploceinae       | Ploceus       | weynsi         | Unknown       | Africa  | Resident |         | (322)        |
| Passeridae                 | Ploceinae       | Ploceus       | golandi        | Unknown       | Africa  | Resident |         | (94)         |
| Passeridae                 | Ploceinae       | Ploceus       | melanocephalus | Unknown       | Africa  | Resident |         | 2 (323)      |
| Passeridae                 | Ploceinae       | Ploceus       | microcephalus  | Unknown       | Africa  | Resident |         | (323)        |
| Passeridae                 | Ploceinae       | Ploceus       | jacksoni       | Unknown       | Africa  | Resident |         | 2 (322)      |
| Passeridae                 | Ploceinae       | Ploceus       | badius         | Unknown       | Africa  | Resident |         | (322)        |
| Passeridae                 | Ploceinae       | Ploceus       | rubiginosus    | Uniparental   | Africa  | Resident |         | 3 (324)      |
| Passeridae                 | Ploceinae       | Ploceus       | aureonucha     | Unknown       | Africa  | Resident |         | (94)         |
| Passeridae                 | Ploceinae       | Ploceus       | tricolor       | Pair          | Africa  | Resident |         | (109)        |
| Passeridae                 | Ploceinae       | Ploceus       | albinucha      | Unknown       | Africa  | Resident |         | (323)        |
| Passeridae                 | Ploceinae       | Ploceus       | nelicourvi     | Pair          | Africa  | Resident |         | 3 (284)      |
| Passeridae                 | Ploceinae       | Ploceus       | sakalava       | Pair          | Africa  | Resident |         | 3 (284)      |
| Passeridae                 | Ploceinae       | Ploceus       | benghalensis   | Pair          | se Asia | Resident |         | 2 (10, 280)  |
| Passeridae                 | Ploceinae       | Ploceus       | manyar         | Pair          | se Asia | Resident |         | 3 (106)      |
| Passeridae                 | Ploceinae       | Ploceus       | philippinus    | Uniparental   | se Asia | Nomadic  |         | 3 (10, 280)  |
| Passeridae                 | Ploceinae       | Ploceus       | hypoxanthus    | Uniparental   | se Asia | Resident |         | (109)        |
| Passeridae                 | Ploceinae       | Ploceus       | megarhynchus   | Pair          | se Asia | Resident |         | 2 (92)       |
| Passeridae                 | Ploceinae       | Ploceus       | bicolor        | Pair          | Africa  | Resident |         | 3 (324)      |
| Passeridae                 | Ploceinae       | Ploceus       | preussi        | Pair          | Africa  | Resident |         | (109)        |
| Passeridae                 | Ploceinae       | Ploceus       | dorsomaculatus | Pair          | Africa  | Resident |         | (109)        |
| Passeridae                 | Ploceinae       | Ploceus       | nicolli        | Unknown       | Africa  | Resident |         | (94)         |
| Passeridae                 | Ploceinae       | Ploceus       | olivaceiceps   | Unknown       | Africa  | Resident |         | 2 (324)      |
| Passeridae                 | Ploceinae       | Ploceus       | insignis       | Pair          | Africa  | Resident |         | (109)        |
| Passeridae                 | Ploceinae       | Ploceus       | angolensis     | Unknown       | Africa  | Resident |         | (468)        |
| Passeridae                 | Ploceinae       | Ploceus       | sanctithomae   | Pair          | Africa  | Resident | Endemic | (109)        |
| Passeridae                 | Ploceinae       | Pachyphantus  | superciliosus  | Unknown       | Africa  | Resident |         | no source    |
| Passeridae                 | Ploceinae       | Malimbus      | flavipes       | Unknown       | Africa  | Resident |         | (94)         |

| Family     | Clade Reference | Genus          | species          | Parental care | Region | Movement  | Island    | Clutch     |
|------------|-----------------|----------------|------------------|---------------|--------|-----------|-----------|------------|
| Passeridae | Ploceinae       | Malimbus       | coronatus        | Suspected     | Africa | Resident  |           | 2 (57)     |
| Passeridae | Ploceinae       | Malimbus       | cassini          | Suspected     | Africa | Resident  |           | (57)       |
| Passeridae | Ploceinae       | Malimbus       | ballmanni        | Cooperation   | Africa | Resident  |           | (183)      |
| Passeridae | Ploceinae       | Malimbus       | racheliae        | Suspected     | Africa | Resident  |           | (57)       |
| Passeridae | Ploceinae       | Malimbus       | scutatus         | Unknown       | Africa | Resident  | 2         | (323)      |
| Passeridae | Ploceinae       | Malimbus       | ibadanensis      | Pair          | Africa | Resident  |           | (141)      |
| Passeridae | Ploceinae       | Malimbus       | erythrogaster    | Unknown       | Africa | Resident  |           | (323)      |
| Passeridae | Ploceinae       | Malimbus       | nitens           | Unknown       | Africa | Resident  | 2         | (57, 241)  |
| Passeridae | Ploceinae       | Malimbus       | malimbicus       | Pair          | Africa | Resident  | 2         | (57)       |
| Passeridae | Ploceinae       | Malimbus       | rubricollis      | Unknown       | Africa | Resident  | 2         | (323)      |
| Passeridae | Ploceinae       | Anaplectes     | rubriceps        | Pair          | Africa | Resident  | 3         | (324)      |
| Passeridae | Ploceinae       | Brachycope     | anomala          | Unknown       | Africa | Resident  | 2         | (323)      |
| Passeridae | Ploceinae       | Quelea         | cardinalis       | Unknown       | Africa | Migration | 2         | (324)      |
| Passeridae | Ploceinae       | Quelea         | erythroptus      | Uniparental   | Africa | Migration | 2         | (324)      |
| Passeridae | Ploceinae       | Quelea         | quelea           | Pair          | Africa | Nomadic   | 3         | (324)      |
| Passeridae | Ploceinae       | Foudia         | madagascariensis | Pair          | Africa | Resident  | 3         | (284)      |
| Passeridae | Ploceinae       | Foudia         | eminentissima    | Pair          | Africa | Resident  | Endemic 3 | (452)      |
| Passeridae | Ploceinae       | Foudia         | omissa           | Unknown       | Africa | Resident  |           | (284)      |
| Passeridae | Ploceinae       | Foudia         | rubra            | Pair          | Africa | Resident  | Endemic 3 | (434)      |
| Passeridae | Ploceinae       | Foudia         | sechellarum      | Pair          | Africa | Resident  | Endemic 2 | (452)      |
| Passeridae | Ploceinae       | Foudia         | flavicans        | Unknown       | Africa | Resident  | Endemic 3 | (247)      |
| Passeridae | Ploceinae       | Euplectes      | afer             | Uniparental   | Africa | Nomadic   | 3         | (324)      |
| Passeridae | Ploceinae       | Euplectes      | diadematus       | Uniparental   | Africa | Nomadic   |           | (99)       |
| Passeridae | Ploceinae       | Euplectes      | gierowii         | Uniparental   | Africa | Nomadic   |           | (109)      |
| Passeridae | Ploceinae       | Euplectes      | hordeaceus       | Uniparental   | Africa | Nomadic   | 3         | (324)      |
| Passeridae | Ploceinae       | Euplectes      | franciscanus     | Uniparental   | Africa | Nomadic   |           | (99)       |
| Passeridae | Ploceinae       | Euplectes      | orix             | Uniparental   | Africa | Nomadic   | 3         | (100, 324) |
| Passeridae | Ploceinae       | Euplectes      | nigroventris     | Uniparental   | Africa | Nomadic   |           | (99)       |
| Passeridae | Ploceinae       | Euplectes      | aureus           | Uniparental   | Africa | Nomadic   |           | (99)       |
| Passeridae | Ploceinae       | Euplectes      | capensis         | Uniparental   | Africa | Nomadic   | 3         | (324)      |
| Passeridae | Ploceinae       | Euplectes      | axillaris        | Uniparental   | Africa | Nomadic   | 3         | (324)      |
| Passeridae | Ploceinae       | Euplectes      | macrourus        | Uniparental   | Africa | Nomadic   | 2         | (440)      |
| Passeridae | Ploceinae       | Euplectes      | albonotatus      | Uniparental   | Africa | Nomadic   | 3         | (324)      |
| Passeridae | Ploceinae       | Euplectes      | ardens           | Uniparental   | Africa | Nomadic   | 2         | (324)      |
| Passeridae | Ploceinae       | Euplectes      | hartlaubi        | Uniparental   | Africa | Nomadic   |           | (109)      |
| Passeridae | Ploceinae       | Euplectes      | psammocromius    | Uniparental   | Africa | Nomadic   |           | (99)       |
| Passeridae | Ploceinae       | Euplectes      | progne           | Uniparental   | Africa | Resident  | 2         | (14)       |
| Passeridae | Ploceinae       | Euplectes      | jacksoni         | Uniparental   | Africa | Resident  |           | (16-18)    |
| Passeridae | Ploceinae       | Amblyospiza    | albifrons        | Uniparental   | Africa | Nomadic   | 2         | (324)      |
| Passeridae | Estrildinae     | Parmoptila     | rubrifrons       | Unknown       | Africa | Resident  |           | (84)       |
| Passeridae | Estrildinae     | Parmoptila     | woodhousei       | Unknown       | Africa | Resident  |           | (84)       |
| Passeridae | Estrildinae     | Nigrita        | fusconota        | Unknown       | Africa | Resident  | 4         | (191)      |
| Passeridae | Estrildinae     | Nigrita        | bicolor          | Unknown       | Africa | Resident  | 5         | (191)      |
| Passeridae | Estrildinae     | Nigrita        | luteifrons       | Unknown       | Africa | Resident  | 4         | (191)      |
| Passeridae | Estrildinae     | Nigrita        | canicapilla      | Unknown       | Africa | Resident  | 5         | (191)      |
| Passeridae | Estrildinae     | Nesocharis     | shelleyi         | Unknown       | Africa | Resident  | 3         | (191)      |
| Passeridae | Estrildinae     | Nesocharis     | ansorgei         | Pair          | Africa | Resident  |           | (191)      |
| Passeridae | Estrildinae     | Nesocharis     | capistrata       | Unknown       | Africa | Resident  |           | (191)      |
| Passeridae | Estrildinae     | Pytilia        | phoenicoptera    | Pair          | Africa | Resident  | 3         | (191)      |
| Passeridae | Estrildinae     | Pytilia        | lineata          | Unknown       | Africa | Resident  |           | (191)      |
| Passeridae | Estrildinae     | Pytilia        | afra             | Pair          | Africa | Nomadic   | 3         | (324)      |
| Passeridae | Estrildinae     | Pytilia        | melba            | Pair          | Africa | Resident  | 4         | (324)      |
| Passeridae | Estrildinae     | Pytilia        | hypogrammica     | Pair          | Africa | Resident  | 3         | (191)      |
| Passeridae | Estrildinae     | Mandingoa      | nitidula         | Pair          | Africa | Resident  | 5         | (324)      |
| Passeridae | Estrildinae     | Cryptospiza    | reichenovii      | Pair          | Africa | Resident  | 3         | (324)      |
| Passeridae | Estrildinae     | Cryptospiza    | salvadorii       | Unknown       | Africa | Resident  | 4         | (191)      |
| Passeridae | Estrildinae     | Cryptospiza    | jacksoni         | Unknown       | Africa | Resident  |           | (191)      |
| Passeridae | Estrildinae     | Cryptospiza    | shelleyi         | Unknown       | Africa | Resident  |           | (46)       |
| Passeridae | Estrildinae     | Pyrenestes     | sanguineus       | Unknown       | Africa | Resident  |           | (191)      |
| Passeridae | Estrildinae     | Pyrenestes     | ostrinus         | Pair          | Africa | Resident  | 4         | (191)      |
| Passeridae | Estrildinae     | Pyrenestes     | minor            | Pair          | Africa | Resident  | 4         | (324)      |
| Passeridae | Estrildinae     | Spermophaga    | poliogenys       | Unknown       | Africa | Resident  |           | (191)      |
| Passeridae | Estrildinae     | Spermophaga    | haematina        | Pair          | Africa | Resident  | 4         | (191)      |
| Passeridae | Estrildinae     | Spermophaga    | ruficapilla      | Pair          | Africa | Resident  | 3         | (191)      |
| Passeridae | Estrildinae     | Clytospiza     | monteiri         | Pair          | Africa | Resident  | 5         | (191)      |
| Passeridae | Estrildinae     | Hypargos       | niveoguttatus    | Pair          | Africa | Resident  | 4         | (324)      |
| Passeridae | Estrildinae     | Hypargos       | margaritatus     | Unknown       | Africa | Resident  | 3         | (324)      |
| Passeridae | Estrildinae     | Euschistospiza | dybowskii        | Pair          | Africa | Resident  | 5         | (191)      |
| Passeridae | Estrildinae     | Euschistospiza | cinereovinacea   | Unknown       | Africa | Resident  |           | (191)      |
| Passeridae | Estrildinae     | Lagonosticta   | rufopicta        | Unknown       | Africa | Resident  | 4         | (191)      |
| Passeridae | Estrildinae     | Lagonosticta   | nitidula         | Pair          | Africa | Resident  | 5         | (324)      |
| Passeridae | Estrildinae     | Lagonosticta   | senegala         | Pair          | Africa | Resident  | 3         | (106)      |
| Passeridae | Estrildinae     | Lagonosticta   | rara             | Pair          | Africa | Resident  |           | (191)      |

| Family     | Clade Reference | Genus         | species         | Parental care | Region    | Movement | Island  | Clutch  |
|------------|-----------------|---------------|-----------------|---------------|-----------|----------|---------|---------|
| Passeridae | Estrildinae     | Lagonosticta  | rubricata       | Pair          | Africa    | Resident |         | 4 (324) |
| Passeridae | Estrildinae     | Lagonosticta  | landanae        | Unknown       | Africa    | Resident |         | (191)   |
| Passeridae | Estrildinae     | Lagonosticta  | virata          | Unknown       | Africa    | Resident |         | 3 (191) |
| Passeridae | Estrildinae     | Lagonosticta  | umbrinodorsalis | Unknown       | Africa    | Resident |         | (191)   |
| Passeridae | Estrildinae     | Lagonosticta  | rhodopareia     | Pair          | Africa    | Resident |         | 4 (324) |
| Passeridae | Estrildinae     | Lagonosticta  | vinacea         | Unknown       | Africa    | Resident |         | (191)   |
| Passeridae | Estrildinae     | Lagonosticta  | larvata         | Unknown       | Africa    | Resident |         | (191)   |
| Passeridae | Estrildinae     | Uraeginthus   | angolensis      | Pair          | Africa    | Nomadic  |         | 4 (324) |
| Passeridae | Estrildinae     | Uraeginthus   | bengalus        | Pair          | Africa    | Resident |         | 5 (191) |
| Passeridae | Estrildinae     | Uraeginthus   | cianocephalus   | Pair          | Africa    | Resident |         | 5 (191) |
| Passeridae | Estrildinae     | Uraeginthus   | ianthinogaster  | Pair          | Africa    | Resident |         | 4 (191) |
| Passeridae | Estrildinae     | Uraeginthus   | granatina       | Pair          | Africa    | Resident |         | 4 (324) |
| Passeridae | Estrildinae     | Estrilda      | caerulescens    | Unknown       | Africa    | Resident |         | (191)   |
| Passeridae | Estrildinae     | Estrilda      | perreini        | Unknown       | Africa    | Resident |         | 4 (324) |
| Passeridae | Estrildinae     | Estrilda      | thomensis       | Pair          | Africa    | Resident |         | 3 (324) |
| Passeridae | Estrildinae     | Estrilda      | quartinia       | Pair          | Africa    | Resident |         | 5 (324) |
| Passeridae | Estrildinae     | Estrilda      | melanotis       | Unknown       | Africa    | Resident |         | 5 (324) |
| Passeridae | Estrildinae     | Estrilda      | poliopareia     | Unknown       | Africa    | Resident |         | (46)    |
| Passeridae | Estrildinae     | Estrilda      | paludicola      | Unknown       | Africa    | Resident |         | 5 (191) |
| Passeridae | Estrildinae     | Estrilda      | ochrogaster     | Unknown       | Africa    | Resident |         | (191)   |
| Passeridae | Estrildinae     | Estrilda      | melpoda         | Pair          | Africa    | Resident |         | 5 (191) |
| Passeridae | Estrildinae     | Estrilda      | rhodopyga       | Pair          | Africa    | Resident |         | 6 (191) |
| Passeridae | Estrildinae     | Estrilda      | rufibarba       | Unknown       | Africa    | Resident |         | (191)   |
| Passeridae | Estrildinae     | Estrilda      | trogodytes      | Pair          | Africa    | Resident |         | 5 (191) |
| Passeridae | Estrildinae     | Estrilda      | astrild         | Pair          | Africa    | Nomadic  |         | 5 (106) |
| Passeridae | Estrildinae     | Estrilda      | nigriloris      | Unknown       | Africa    | Resident |         | (191)   |
| Passeridae | Estrildinae     | Estrilda      | nonnulla        | Pair          | Africa    | Resident |         | 5 (191) |
| Passeridae | Estrildinae     | Estrilda      | atricapilla     | Unknown       | Africa    | Resident |         | (191)   |
| Passeridae | Estrildinae     | Estrilda      | kandti          | Unknown       | Africa    | Resident |         | (191)   |
| Passeridae | Estrildinae     | Estrilda      | erythronotos    | Unknown       | Africa    | Resident |         | 4 (324) |
| Passeridae | Estrildinae     | Estrilda      | charmosyna      | Unknown       | Africa    | Resident |         | 4 (324) |
| Passeridae | Estrildinae     | Amandava      | amandava        | Pair          | se Asia   | Resident |         | 5 (106) |
| Passeridae | Estrildinae     | Amandava      | formosa         | Pair          | se Asia   | Resident |         | 5 (191) |
| Passeridae | Estrildinae     | Amandava      | subflava        | Pair          | Africa    | Resident |         | 5 (324) |
| Passeridae | Estrildinae     | Ortygospiza   | atricollis      | Pair          | Africa    | Nomadic  |         | 4 (324) |
| Passeridae | Estrildinae     | Ortygospiza   | gabonensis      | Unknown       | Africa    | Nomadic  |         | (191)   |
| Passeridae | Estrildinae     | Ortygospiza   | locustella      | Unknown       | Africa    | Nomadic  |         | 5 (324) |
| Passeridae | Estrildinae     | Emblema       | pictum          | Pair          | Australia | Nomadic  |         | 4 (470) |
| Passeridae | Estrildinae     | Stagonopleura | bella           | Pair          | Australia | Resident |         | 5 (470) |
| Passeridae | Estrildinae     | Stagonopleura | oculata         | Pair          | Australia | Resident |         | 5 (470) |
| Passeridae | Estrildinae     | Stagonopleura | guttata         | Pair          | Australia | Resident |         | 5 (470) |
| Passeridae | Estrildinae     | Oreostruthus  | fuliginosus     | Unknown       | Australia | Resident |         | 2 (87)  |
| Passeridae | Estrildinae     | Neochmia      | temporalis      | Pair          | Australia | Nomadic  |         | 5 (470) |
| Passeridae | Estrildinae     | Neochmia      | phaeton         | Pair          | Australia | Resident |         | 6 (470) |
| Passeridae | Estrildinae     | Neochmia      | ruficauda       | Pair          | Australia | Resident |         | 4 (470) |
| Passeridae | Estrildinae     | Neochmia      | modesta         | Pair          | Australia | Resident |         | 5 (470) |
| Passeridae | Estrildinae     | Taeniopygia   | guttata         | Pair          | Australia | Resident |         | 5 (470) |
| Passeridae | Estrildinae     | Taeniopygia   | bichenovii      | Pair          | Australia | Nomadic  |         | 5 (470) |
| Passeridae | Estrildinae     | Poephila      | peronata        | Pair          | Australia | Resident |         | 5 (470) |
| Passeridae | Estrildinae     | Poephila      | acuticauda      | Pair          | Australia | Resident |         | 5 (470) |
| Passeridae | Estrildinae     | Poephila      | cincta          | Pair          | Australia | Resident |         | 5 (470) |
| Passeridae | Estrildinae     | Erythrura     | hyperythra      | Unknown       | se Asia   | Resident |         | (271)   |
| Passeridae | Estrildinae     | Erythrura     | prasina         | Unknown       | se Asia   | Nomadic  |         | 5 (191) |
| Passeridae | Estrildinae     | Erythrura     | viridifacies    | Unknown       | se Asia   | Nomadic  |         | (92)    |
| Passeridae | Estrildinae     | Erythrura     | tricolor        | Unknown       | Australia | Resident | Endemic | (191)   |
| Passeridae | Estrildinae     | Erythrura     | trichroa        | Pair          | Australia | Nomadic  |         | 4 (470) |
| Passeridae | Estrildinae     | Erythrura     | coloria         | Unknown       | se Asia   | Resident |         | (271)   |
| Passeridae | Estrildinae     | Erythrura     | papuana         | Unknown       | Australia | Nomadic  |         | (87)    |
| Passeridae | Estrildinae     | Erythrura     | psittacea       | Pair          | Australia | Resident | Endemic | 4 (191) |
| Passeridae | Estrildinae     | Erythrura     | pealii          | Pair          | Australia | Resident | Endemic | 4 (508) |
| Passeridae | Estrildinae     | Erythrura     | cyaneovirens    | Pair          | Australia | Resident | Endemic | 3 (191) |
| Passeridae | Estrildinae     | Erythrura     | regia           | Pair          | Australia | Resident | Endemic | 3 (191) |
| Passeridae | Estrildinae     | Erythrura     | kleinschmidti   | Unknown       | Australia | Resident | Endemic | (508)   |
| Passeridae | Estrildinae     | Chloebia      | gouldiae        | Pair          | Australia | Nomadic  |         | 6 (470) |
| Passeridae | Estrildinae     | Lemuresthes   | nana            | Pair          | Africa    | Resident |         | 5 (284) |
| Passeridae | Estrildinae     | Lonchura      | cantans         | Pair          | Africa    | Resident |         | 4 (191) |
| Passeridae | Estrildinae     | Lonchura      | malabarica      | Pair          | se Asia   | Resident |         | 5 (191) |
| Passeridae | Estrildinae     | Lonchura      | griseicapilla   | Pair          | Africa    | Resident |         | 4 (191) |
| Passeridae | Estrildinae     | Lonchura      | cucullata       | Pair          | Africa    | Resident |         | 5 (324) |
| Passeridae | Estrildinae     | Lonchura      | bicolor         | Unknown       | Africa    | Resident |         | 5 (324) |
| Passeridae | Estrildinae     | Lonchura      | nigriceps       | Unknown       | Africa    | Resident |         | (191)   |
| Passeridae | Estrildinae     | Lonchura      | fringilloides   | Unknown       | Africa    | Nomadic  |         | 5 (324) |
| Passeridae | Estrildinae     | Lonchura      | striata         | Pair          | se Asia   | Resident |         | 5 (191) |

| Family     | Clade Reference | Genus        | species         | Parental care  | Region    | Movement    | Island   | Clutch     |
|------------|-----------------|--------------|-----------------|----------------|-----------|-------------|----------|------------|
| Passeridae | Estrildinae     | Lonchura     | leucogastroides | Unknown        | se Asia   | Resident    |          | 5 (191)    |
| Passeridae | Estrildinae     | Lonchura     | fuscans         | Unknown        | se Asia   | Resident    |          | 4 (191)    |
| Passeridae | Estrildinae     | Lonchura     | molucca         | Pair           | Australia | Resident    | Endemic  | 4 (191)    |
| Passeridae | Estrildinae     | Lonchura     | kelaarti        | Pair           | se Asia   | Resident    |          | 6 (191)    |
| Passeridae | Estrildinae     | Lonchura     | punctulata      | Pair           | se Asia   | Nomadic     |          | 5 (470)    |
| Passeridae | Estrildinae     | Lonchura     | leucogastra     | Unknown        | se Asia   | Resident    |          | 6 (191)    |
| Passeridae | Estrildinae     | Lonchura     | tristissima     | Unknown        | Australia | Resident    |          | (87)       |
| Passeridae | Estrildinae     | Lonchura     | leucosticta     | Unknown        | Australia | Resident    |          | (191)      |
| Passeridae | Estrildinae     | Lonchura     | malacca         | Pair           | se Asia   | Nomadic     |          | 6 (191)    |
| Passeridae | Estrildinae     | Lonchura     | ferruginosa     | Unknown        | se Asia   | Resident    |          | (191)      |
| Passeridae | Estrildinae     | Lonchura     | quinticolor     | Unknown        | Australia | Resident    | Endemic  | (191)      |
| Passeridae | Estrildinae     | Lonchura     | maja            | Unknown        | se Asia   | Resident    |          | (191)      |
| Passeridae | Estrildinae     | Lonchura     | pallida         | Unknown        | Australia | Resident    | Endemic  | (191)      |
| Passeridae | Estrildinae     | Lonchura     | grandis         | Unknown        | Australia | Resident    |          | 5 (87)     |
| Passeridae | Estrildinae     | Lonchura     | vana            | Unknown        | Australia | Resident    |          | (191)      |
| Passeridae | Estrildinae     | Lonchura     | caniceps        | Pair           | Australia | Nomadic     |          | 5 (87)     |
| Passeridae | Estrildinae     | Lonchura     | nevermanni      | Unknown        | Australia | Resident    |          | (87)       |
| Passeridae | Estrildinae     | Lonchura     | spectabilis     | Pair           | Australia | Nomadic     |          | 5 (87)     |
| Passeridae | Estrildinae     | Lonchura     | hunsteini       | Unknown        | Australia | Resident    | Endemic  | (87)       |
| Passeridae | Estrildinae     | Lonchura     | forbesi         | Unknown        | Australia | Resident    | Endemic  | (87)       |
| Passeridae | Estrildinae     | Lonchura     | nigerrima       | Unknown        | Australia | Resident    | Endemic  | (191)      |
| Passeridae | Estrildinae     | Lonchura     | flaviprymna     | Pair           | Australia | Nomadic     |          | 5 (470)    |
| Passeridae | Estrildinae     | Lonchura     | castaneothorax  | Pair           | Australia | Nomadic     |          | 5 (87)     |
| Passeridae | Estrildinae     | Lonchura     | stygia          | Pair           | Australia | Resident    |          | 4 (87)     |
| Passeridae | Estrildinae     | Lonchura     | teerinki        | Unknown        | Australia | Resident    |          | (191)      |
| Passeridae | Estrildinae     | Lonchura     | montana         | Unknown        | Australia | Resident    |          | (87)       |
| Passeridae | Estrildinae     | Lonchura     | monticola       | Unknown        | Australia | Resident    |          | (87)       |
| Passeridae | Estrildinae     | Lonchura     | melaena         | Unknown        | Australia | Nomadic     | Endemic  | (87)       |
| Passeridae | Estrildinae     | Heteromunia  | pectoralis      | Pair           | Australia | Nomadic     |          | 5 (470)    |
| Passeridae | Estrildinae     | Padda        | oryzivora       | Pair           | se Asia   | Resident    |          | 5 (191)    |
| Passeridae | Estrildinae     | Padda        | fuscata         | Unknown        | se Asia   | Resident    | Endemic  | (191)      |
| Passeridae | Estrildinae     | Amadina      | fasciata        | Pair           | Africa    | Nomadic     |          | 4 (324)    |
| Passeridae | Estrildinae     | Amadina      | erythrocephala  | Pair           | Africa    | Nomadic     |          | 4 (324)    |
| Passeridae | Viduiinae       | Anomalospiza | imberbis        | Brood parasite |           | Africa      | Nomadic  | 3 (462)    |
| Passeridae | Viduiinae       | Vidua        | chalybeata      | Brood parasite |           | Africa      | Nomadic  | (324,      |
| Passeridae | Viduiinae       | Vidua        | raricola        | Brood parasite |           | Africa      | Nomadic  | (386)      |
| Passeridae | Viduiinae       | Vidua        | larvaticola     | Brood parasite |           | Africa      | Nomadic  | (384)      |
| Passeridae | Viduiinae       | Vidua        | funerea         | Brood parasite |           | Africa      | Nomadic  | (324)      |
| Passeridae | Viduiinae       | Vidua        | codringtoni     | Brood parasite |           | Africa      | Nomadic  | (387)      |
| Passeridae | Viduiinae       | Vidua        | purpurascens    | Brood parasite |           | Africa      | Resident | (324)      |
| Passeridae | Viduiinae       | Vidua        | wilsoni         | Brood parasite |           | Africa      | Resident | (324)      |
| Passeridae | Viduiinae       | Vidua        | hypocherina     | Brood parasite |           | Africa      | Nomadic  | (462)      |
| Passeridae | Viduiinae       | Vidua        | fischeri        | Brood parasite |           | Africa      | Nomadic  | (389)      |
| Passeridae | Viduiinae       | Vidua        | regia           | Brood parasite |           | Africa      | Nomadic  | (36, 324)  |
| Passeridae | Viduiinae       | Vidua        | macroura        | Brood parasite |           | Africa      | Nomadic  | (324,      |
| Passeridae | Viduiinae       | Vidua        | orientalis      | Brood parasite |           | Africa      | Nomadic  | (51)       |
| Passeridae | Viduiinae       | Vidua        | togoensis       | Brood parasite |           | Africa      | Resident | (51)       |
| Passeridae | Viduiinae       | Vidua        | interjecta      | Brood parasite |           | Africa      | Nomadic  | (51)       |
| Passeridae | Viduiinae       | Vidua        | paradisaea      | Brood parasite |           | Africa      | Nomadic  | (324)      |
| Passeridae | Viduiinae       | Vidua        | obtusa          | Brood parasite |           | Africa      | Nomadic  | (324)      |
| Passeridae | Prunellinae     | Prunella     | collaris        | Cooperation    | Paleartic | Partial     |          | (355, 356) |
| Passeridae | Prunellinae     | Prunella     | himalayana      | Unknown        | Paleartic | Altitudinal |          | 4 (113)    |
| Passeridae | Prunellinae     | Prunella     | rubeculoides    | Unknown        | Paleartic | Altitudinal |          | 3 (113)    |
| Passeridae | Prunellinae     | Prunella     | strophhiata     | Unknown        | Paleartic | Altitudinal |          | 4 (113)    |
| Passeridae | Prunellinae     | Prunella     | montanella      | Unknown        | Paleartic | Migration   |          | (113)      |
| Passeridae | Prunellinae     | Prunella     | ocularis        | Unknown        | Paleartic | Resident    |          | (113)      |
| Passeridae | Prunellinae     | Prunella     | fagani          | Unknown        | Paleartic | Resident    |          | (113)      |
| Passeridae | Prunellinae     | Prunella     | fulvescens      | Unknown        | Paleartic | Altitudinal |          | 3 (113)    |
| Passeridae | Prunellinae     | Prunella     | atrogularis     | Unknown        | Paleartic | Altitudinal |          | (113)      |
| Passeridae | Prunellinae     | Prunella     | koslowi         | Unknown        | Paleartic | Resident    |          | (113)      |
| Passeridae | Prunellinae     | Prunella     | modularis       | Cooperation    | Paleartic | Partial     |          | (113)      |
| Passeridae | Prunellinae     | Prunella     | rubida          | Cooperation    | Paleartic | Resident    |          | 3 (113)    |
| Passeridae | Prunellinae     | Prunella     | immaculata      | Unknown        | Paleartic | Altitudinal |          | (113)      |
| Chloropsis | Chloropsis      | Chloropsis   | flavipennis     | Unknown        | se Asia   | Resident    |          | (92)       |
| Chloropsis | Chloropsis      | Chloropsis   | palawanensis    | Unknown        | se Asia   | Resident    |          | (271)      |
| Chloropsis | Chloropsis      | Chloropsis   | sonnerati       | Unknown        | se Asia   | Resident    |          | (305)      |
| Chloropsis | Chloropsis      | Chloropsis   | cyanopogon      | Unknown        | se Asia   | Resident    |          | (46)       |
| Chloropsis | Chloropsis      | Chloropsis   | cochinchinensis | Unknown        | se Asia   | Resident    |          | 2 (5)      |
| Chloropsis | Chloropsis      | Chloropsis   | aurifrons       | Unknown        | se Asia   | Resident    |          | 2 (5)      |
| Chloropsis | Chloropsis      | Chloropsis   | hardwickii      | Unknown        | se Asia   | Resident    |          | (305)      |
| Chloropsis | Chloropsis      | Chloropsis   | venusta         | Unknown        | se Asia   | Resident    |          | (46)       |

| Family        | Clade Reference | Genus        | species         | Parental care | Region    | Movement    | Island  | Clutch |
|---------------|-----------------|--------------|-----------------|---------------|-----------|-------------|---------|--------|
| Irenidae      | Irenidae        | Irena        | puella          | Pair          | se Asia   | Resident    |         | 2 (5)  |
| Irenidae      | Irenidae        | Irena        | cyanogaster     | Unknown       | se Asia   | Resident    |         | (271)  |
| Nectariniidae | Promeropinae    | Promerops    | gurneyi         | Pair          | Africa    | Nomadic     |         | 1 (72) |
| Nectariniidae | Promeropinae    | Promerops    | cafer           | Pair          | Africa    | Nomadic     |         | 2 (72) |
| Nectariniidae | Dicaeini        | Prionochilus | olivaceus       | Unknown       | se Asia   | Resident    |         | (72)   |
| Nectariniidae | Dicaeini        | Prionochilus | maculatus       | Unknown       | se Asia   | Resident    |         | (72)   |
| Nectariniidae | Dicaeini        | Prionochilus | percussus       | Unknown       | se Asia   | Resident    |         | (72)   |
| Nectariniidae | Dicaeini        | Prionochilus | plateni         | Unknown       | se Asia   | Resident    |         | (72)   |
| Nectariniidae | Dicaeini        | Prionochilus | xanthopygius    | Unknown       | se Asia   | Resident    |         | (72)   |
| Nectariniidae | Dicaeini        | Prionochilus | thoracicus      | Unknown       | se Asia   | Nomadic     |         | (72)   |
| Nectariniidae | Dicaeini        | Dicaeum      | annae           | Unknown       | se Asia   | Resident    | Endemic | (72)   |
| Nectariniidae | Dicaeini        | Dicaeum      | agile           | Pair          | se Asia   | Partial     |         | 3 (72) |
| Nectariniidae | Dicaeini        | Dicaeum      | aeruginosum     | Unknown       | se Asia   | Resident    |         | (72)   |
| Nectariniidae | Dicaeini        | Dicaeum      | everetti        | Unknown       | se Asia   | Resident    |         | (72)   |
| Nectariniidae | Dicaeini        | Dicaeum      | proprum         | Unknown       | se Asia   | Resident    |         | (72)   |
| Nectariniidae | Dicaeini        | Dicaeum      | chrysorrhoeum   | Pair          | se Asia   | Resident    |         | 2 (72) |
| Nectariniidae | Dicaeini        | Dicaeum      | melanoxanthum   | Unknown       | se Asia   | Altitudinal |         | 3 (72) |
| Nectariniidae | Dicaeini        | Dicaeum      | vincens         | Unknown       | se Asia   | Resident    |         | 2 (72) |
| Nectariniidae | Dicaeini        | Dicaeum      | aureolimbatum   | Unknown       | se Asia   | Resident    |         | (72)   |
| Nectariniidae | Dicaeini        | Dicaeum      | nigrilore       | Unknown       | se Asia   | Resident    |         | (72)   |
| Nectariniidae | Dicaeini        | Dicaeum      | anthonyi        | Unknown       | se Asia   | Resident    |         | (72)   |
| Nectariniidae | Dicaeini        | Dicaeum      | bicolor         | Unknown       | se Asia   | Resident    |         | (72)   |
| Nectariniidae | Dicaeini        | Dicaeum      | quadricolor     | Unknown       | se Asia   | Resident    | Endemic | (72)   |
| Nectariniidae | Dicaeini        | Dicaeum      | australe        | Unknown       | se Asia   | Resident    |         | (72)   |
| Nectariniidae | Dicaeini        | Dicaeum      | retrocinctum    | Unknown       | se Asia   | Resident    |         | (72)   |
| Nectariniidae | Dicaeini        | Dicaeum      | trigonostigma   | Unknown       | se Asia   | Resident    |         | 2 (72) |
| Nectariniidae | Dicaeini        | Dicaeum      | hypoleucum      | Unknown       | se Asia   | Resident    |         | (72)   |
| Nectariniidae | Dicaeini        | Dicaeum      | erythrorhynchus | Pair          | se Asia   | Partial     |         | 2 (72) |
| Nectariniidae | Dicaeini        | Dicaeum      | concolor        | Pair          | se Asia   | Resident    |         | 2 (72) |
| Nectariniidae | Dicaeini        | Dicaeum      | pygmaeum        | Unknown       | se Asia   | Resident    |         | (72)   |
| Nectariniidae | Dicaeini        | Dicaeum      | nehorkorni      | Unknown       | se Asia   | Resident    |         | (72)   |
| Nectariniidae | Dicaeini        | Dicaeum      | erythrothorax   | Unknown       | se Asia   | Resident    | Endemic | (72)   |
| Nectariniidae | Dicaeini        | Dicaeum      | vulneratum      | Unknown       | se Asia   | Resident    | Endemic | (72)   |
| Nectariniidae | Dicaeini        | Dicaeum      | pectorale       | Unknown       | Australia | Resident    |         | (72)   |
| Nectariniidae | Dicaeini        | Dicaeum      | geelvinkianum   | Unknown       | Australia | Resident    |         | 2 (72) |
| Nectariniidae | Dicaeini        | Dicaeum      | nitidum         | Unknown       | Australia | Resident    |         | (72)   |
| Nectariniidae | Dicaeini        | Dicaeum      | eximium         | Unknown       | Australia | Resident    | Endemic | (72)   |
| Nectariniidae | Dicaeini        | Dicaeum      | aeneum          | Unknown       | Australia | Resident    | Endemic | (72)   |
| Nectariniidae | Dicaeini        | Dicaeum      | tristrami       | Unknown       | Australia | Resident    | Endemic | (72)   |
| Nectariniidae | Dicaeini        | Dicaeum      | igniferum       | Unknown       | se Asia   | Resident    | Endemic | (72)   |
| Nectariniidae | Dicaeini        | Dicaeum      | maugei          | Unknown       | se Asia   | Resident    | Endemic | 2 (72) |
| Nectariniidae | Dicaeini        | Dicaeum      | ignipectus      | Unknown       | se Asia   | Partial     |         | (72)   |
| Nectariniidae | Dicaeini        | Dicaeum      | monticolum      | Unknown       | se Asia   | Resident    |         | (72)   |
| Nectariniidae | Dicaeini        | Dicaeum      | celebicum       | Unknown       | se Asia   | Resident    |         | (72)   |
| Nectariniidae | Dicaeini        | Dicaeum      | sanguinolentum  | Unknown       | se Asia   | Resident    |         | (72)   |
| Nectariniidae | Dicaeini        | Dicaeum      | hirundinaceum   | Pair          | Australia | Nomadic     |         | 3 (72) |
| Nectariniidae | Dicaeini        | Dicaeum      | cruentatum      | Pair          | se Asia   | Resident    |         | (72)   |
| Nectariniidae | Dicaeini        | Dicaeum      | trochileum      | Unknown       | se Asia   | Resident    |         | (72)   |
| Nectariniidae | Nectariniini    | Anthreptes   | fraseri         | Unknown       | Africa    | Resident    |         | (72)   |
| Nectariniidae | Nectariniini    | Anthreptes   | axillaris       | Unknown       | Africa    | Resident    |         | (72)   |
| Nectariniidae | Nectariniini    | Anthreptes   | reichenowi      | Pair          | Africa    | Nomadic     |         | 2 (72) |
| Nectariniidae | Nectariniini    | Anthreptes   | anchietae       | Unknown       | Africa    | Nomadic     |         | 1 (72) |
| Nectariniidae | Nectariniini    | Anthreptes   | simplex         | Unknown       | se Asia   | Resident    |         | (72)   |
| Nectariniidae | Nectariniini    | Anthreptes   | malacensis      | Pair          | se Asia   | Resident    |         | 2 (72) |
| Nectariniidae | Nectariniini    | Anthreptes   | rhodolaema      | Pair          | se Asia   | Resident    |         | 1 (72) |
| Nectariniidae | Nectariniini    | Anthreptes   | singalensis     | Pair          | se Asia   | Resident    |         | 2 (72) |
| Nectariniidae | Nectariniini    | Anthreptes   | gabonicus       | Pair          | Africa    | Nomadic     |         | 1 (72) |
| Nectariniidae | Nectariniini    | Anthreptes   | longuemarei     | Pair          | Africa    | Partial     |         | 1 (72) |
| Nectariniidae | Nectariniini    | Anthreptes   | orientalis      | Unknown       | Africa    | Resident    |         | (72)   |
| Nectariniidae | Nectariniini    | Anthreptes   | neglectus       | Pair          | Africa    | Resident    |         | (72)   |
| Nectariniidae | Nectariniini    | Anthreptes   | aurantium       | Uniparental   | Africa    | Resident    |         | 1 (72) |
| Nectariniidae | Nectariniini    | Anthreptes   | pallidigaster   | Pair          | Africa    | Resident    |         | 2 (72) |
| Nectariniidae | Nectariniini    | Anthreptes   | rectirostris    | Cooperation   | Africa    | Nomadic     |         | 2 (72) |
| Nectariniidae | Nectariniini    | Anthreptes   | rubritorques    | Uniparental   | Africa    | Resident    |         | 2 (72) |
| Nectariniidae | Nectariniini    | Anthreptes   | collaris        | Unknown       | Africa    | Resident    |         | 2 (72) |
| Nectariniidae | Nectariniini    | Anthreptes   | platurus        | Pair          | Africa    | Partial     |         | 1 (72) |
| Nectariniidae | Nectariniini    | Anthreptes   | metallicus      | Pair          | Africa    | Migration   |         | 2 (72) |
| Nectariniidae | Nectariniini    | Hypogramma   | hypogrammicum   | Pair          | se Asia   | Resident    |         | 2 (72) |
| Nectariniidae | Nectariniini    | Nectarinia   | seimundi        | Unknown       | Africa    | Resident    |         | 2 (72) |
| Nectariniidae | Nectariniini    | Nectarinia   | batesi          | Unknown       | Africa    | Resident    |         | 2 (72) |
| Nectariniidae | Nectariniini    | Nectarinia   | olivacea        | Pair          | Africa    | Resident    |         | 2 (72) |
| Nectariniidae | Nectariniini    | Nectarinia   | violacea        | Pair          | Africa    | Resident    |         | 2 (72) |
| Nectariniidae | Nectariniini    | Nectarinia   | veroxii         | Unknown       | Africa    | Nomadic     |         | 2 (72) |

| Family        | Clade Reference | Genus      | species         | Parental care | Region     | Movement  | Island  | Clutch      |
|---------------|-----------------|------------|-----------------|---------------|------------|-----------|---------|-------------|
| Nectariniidae | Nectariniini    | Nectarinia | reichenbachii   | Pair          | Africa     | Resident  |         | 1 (72)      |
| Nectariniidae | Nectariniini    | Nectarinia | hartlaubii      | Unknown       | Africa     | Resident  | Endemic | 2 (72)      |
| Nectariniidae | Nectariniini    | Nectarinia | newtonii        | Unknown       | Africa     | Partial   | Endemic | 2 (72)      |
| Nectariniidae | Nectariniini    | Nectarinia | thomensis       | Unknown       | Africa     | Nomadic   | Endemic | 2 (72)      |
| Nectariniidae | Nectariniini    | Nectarinia | oritis          | Pair          | Africa     | Resident  |         | 1 (72)      |
| Nectariniidae | Nectariniini    | Nectarinia | alinae          | Pair          | Africa     | Resident  |         | 1 (72)      |
| Nectariniidae | Nectariniini    | Nectarinia | verticalis      | Pair          | Africa     | Resident  |         | 2 (72)      |
| Nectariniidae | Nectariniini    | Nectarinia | bannermani      | Unknown       | Africa     | Resident  |         | 2 (72)      |
| Nectariniidae | Nectariniini    | Nectarinia | cyanolaema      | Unknown       | Africa     | Resident  |         | 2 (72)      |
| Nectariniidae | Nectariniini    | Nectarinia | balfouri        | Pair          | Africa     | Resident  | Endemic | 3 (72)      |
| Nectariniidae | Nectariniini    | Nectarinia | dussumieri      | Cooperation   | Africa     | Resident  | Endemic | 1 (72)      |
| Nectariniidae | Nectariniini    | Nectarinia | fuliginosa      | Unknown       | Africa     | Nomadic   |         | 2 (72)      |
| Nectariniidae | Nectariniini    | Nectarinia | amethystina     | Pair          | Africa     | Nomadic   |         | 2 (72)      |
| Nectariniidae | Nectariniini    | Nectarinia | rubescens       | Unknown       | Africa     | Nomadic   |         | 2 (72)      |
| Nectariniidae | Nectariniini    | Nectarinia | senegalensis    | Pair          | Africa     | Nomadic   |         | 2 (72)      |
| Nectariniidae | Nectariniini    | Nectarinia | hunteri         | Unknown       | Africa     | Nomadic   |         | 1 (72)      |
| Nectariniidae | Nectariniini    | Nectarinia | adelberti       | Unknown       | Africa     | Nomadic   |         | (72)        |
| Nectariniidae | Nectariniini    | Nectarinia | zeylonica       | Occasional    | se Asia    | Resident  |         | 2 (72, 175) |
| Nectariniidae | Nectariniini    | Nectarinia | minima          | Unknown       | se Asia    | Resident  |         | 2 (72)      |
| Nectariniidae | Nectariniini    | Nectarinia | sperata         | Unknown       | se Asia    | Nomadic   |         | 2 (72)      |
| Nectariniidae | Nectariniini    | Nectarinia | aspasia         | Unknown       | Australia  | Resident  |         | 2 (72)      |
| Nectariniidae | Nectariniini    | Nectarinia | calcostetha     | Unknown       | se Asia    | Resident  |         | 2 (72)      |
| Nectariniidae | Nectariniini    | Nectarinia | jugularis       | Pair          | Widespread |           | Nomadic | 2 (72)      |
| Nectariniidae | Nectariniini    | Nectarinia | buettikoferi    | Unknown       | se Asia    | Resident  | Endemic | (72)        |
| Nectariniidae | Nectariniini    | Nectarinia | solaris         | Unknown       | se Asia    | Resident  | Endemic | (72)        |
| Nectariniidae | Nectariniini    | Nectarinia | sovimanga       | Uniparental   | Africa     | Resident  |         | 2 (72)      |
| Nectariniidae | Nectariniini    | Nectarinia | humbloti        | Unknown       | Africa     | Resident  | Endemic | 1 (72)      |
| Nectariniidae | Nectariniini    | Nectarinia | comorensis      | Unknown       | Africa     | Resident  | Endemic | 1 (72)      |
| Nectariniidae | Nectariniini    | Nectarinia | coquerellii     | Unknown       | Africa     | Resident  | Endemic | (72)        |
| Nectariniidae | Nectariniini    | Nectarinia | venusta         | Pair          | Africa     | Partial   |         | 1 (72)      |
| Nectariniidae | Nectariniini    | Nectarinia | ursulae         | Unknown       | Africa     | Resident  |         | 1 (72)      |
| Nectariniidae | Nectariniini    | Nectarinia | talatala        | Pair          | Africa     | Nomadic   |         | 2 (72)      |
| Nectariniidae | Nectariniini    | Nectarinia | oustaleti       | Unknown       | Africa     | Resident  |         | (72)        |
| Nectariniidae | Nectariniini    | Nectarinia | bouvieri        | Unknown       | Africa     | Partial   |         | 2 (72)      |
| Nectariniidae | Nectariniini    | Nectarinia | osea            | Pair          | Africa     | Nomadic   |         | 2 (72)      |
| Nectariniidae | Nectariniini    | Nectarinia | asiatica        | Pair          | se Asia    | Resident  |         | 2 (72)      |
| Nectariniidae | Nectariniini    | Nectarinia | habessinica     | Unknown       | Africa     | Nomadic   |         | 1 (72)      |
| Nectariniidae | Nectariniini    | Nectarinia | lotenia         | Pair          | se Asia    | Nomadic   |         | 2 (72)      |
| Nectariniidae | Nectariniini    | Nectarinia | manoensis       | Pair          | Africa     | Nomadic   |         | 2 (72)      |
| Nectariniidae | Nectariniini    | Nectarinia | chalybea        | Pair          | Africa     | Nomadic   |         | 2 (72)      |
| Nectariniidae | Nectariniini    | Nectarinia | ludovicensis    | Pair          | Africa     | Resident  |         | 1 (72)      |
| Nectariniidae | Nectariniini    | Nectarinia | prigoginei      | Unknown       | Africa     | Resident  |         | (72)        |
| Nectariniidae | Nectariniini    | Nectarinia | stuhlmanni      | Unknown       | Africa     | Resident  |         | 1 (72)      |
| Nectariniidae | Nectariniini    | Nectarinia | preussi         | Pair          | Africa     | Nomadic   |         | 1 (72)      |
| Nectariniidae | Nectariniini    | Nectarinia | afra            | Pair          | Africa     | Partial   |         | 2 (72)      |
| Nectariniidae | Nectariniini    | Nectarinia | mediocris       | Pair          | Africa     | Partial   |         | 1 (72)      |
| Nectariniidae | Nectariniini    | Nectarinia | neergaardi      | Pair          | Africa     | Resident  |         | (72)        |
| Nectariniidae | Nectariniini    | Nectarinia | chloropygia     | Unknown       | Africa     | Nomadic   |         | 2 (72)      |
| Nectariniidae | Nectariniini    | Nectarinia | minulla         | Pair          | Africa     | Partial   |         | 2 (72)      |
| Nectariniidae | Nectariniini    | Nectarinia | regia           | Pair          | Africa     | Resident  |         | 2 (72)      |
| Nectariniidae | Nectariniini    | Nectarinia | loveridgei      | Pair          | Africa     | Resident  |         | 1 (72)      |
| Nectariniidae | Nectariniini    | Nectarinia | moreaui         | Unknown       | Africa     | Resident  |         | (72)        |
| Nectariniidae | Nectariniini    | Nectarinia | rockefelleri    | Unknown       | Africa     | Resident  |         | (72)        |
| Nectariniidae | Nectariniini    | Nectarinia | cuprea          | Pair          | Africa     | Partial   |         | 2 (72)      |
| Nectariniidae | Nectariniini    | Nectarinia | fusca           | Pair          | Africa     | Nomadic   |         | 2 (72)      |
| Nectariniidae | Nectariniini    | Nectarinia | rufipennis      | Unknown       | Africa     | Partial   |         | (72)        |
| Nectariniidae | Nectariniini    | Nectarinia | tacazze         | Pair          | Africa     | Migration |         | 1 (72)      |
| Nectariniidae | Nectariniini    | Nectarinia | purpureiventris | Unknown       | Africa     | Nomadic   |         | 2 (72)      |
| Nectariniidae | Nectariniini    | Nectarinia | bocagii         | Unknown       | Africa     | Resident  |         | 2 (72)      |
| Nectariniidae | Nectariniini    | Nectarinia | kilimensis      | Pair          | Africa     | Nomadic   |         | 1 (72)      |
| Nectariniidae | Nectariniini    | Nectarinia | reichenowi      | Unknown       | Africa     | Nomadic   |         | 1 (72)      |
| Nectariniidae | Nectariniini    | Nectarinia | famosa          | Pair          | Africa     | Nomadic   |         | 1 (72)      |
| Nectariniidae | Nectariniini    | Nectarinia | johnstoni       | Uniparental   | Africa     | Nomadic   |         | 1 (72)      |
| Nectariniidae | Nectariniini    | Nectarinia | shellei         | Unknown       | Africa     | Resident  |         | (72)        |
| Nectariniidae | Nectariniini    | Nectarinia | erythrocerca    | Unknown       | Africa     | Resident  |         | 1 (72)      |
| Nectariniidae | Nectariniini    | Nectarinia | congensis       | Unknown       | Africa     | Resident  |         | (72)        |
| Nectariniidae | Nectariniini    | Nectarinia | marquensis      | Uniparental   | Africa     | Nomadic   |         | 2 (72)      |
| Nectariniidae | Nectariniini    | Nectarinia | bifasciata      | Pair          | Africa     | Migration |         | 2 (72)      |
| Nectariniidae | Nectariniini    | Nectarinia | pembae          | Unknown       | Africa     | Resident  |         | (72)        |
| Nectariniidae | Nectariniini    | Nectarinia | notata          | Uniparental   | Africa     | Nomadic   |         | 2 (72)      |
| Nectariniidae | Nectariniini    | Nectarinia | coccinigaster   | Unknown       | Africa     | Partial   |         | 1 (72)      |
| Nectariniidae | Nectariniini    | Nectarinia | johannae        | Unknown       | Africa     | Resident  |         | 1 (72)      |
| Nectariniidae | Nectariniini    | Nectarinia | superba         | Unknown       | Africa     | Resident  |         | 1 (72)      |

| Family        | Clade Reference | Genus           | species         | Parental care | Region     | Movement    | Island   | Clutch     |
|---------------|-----------------|-----------------|-----------------|---------------|------------|-------------|----------|------------|
| Nectariniidae | Nectariniini    | Nectarinia      | pulchella       | Unknown       | Africa     | Partial     |          | 2 (72)     |
| Nectariniidae | Nectariniini    | Nectarinia      | nectarinioides  | Unknown       | Africa     | Resident    |          | 1 (72)     |
| Nectariniidae | Nectariniini    | Aethopyga       | primigenius     | Unknown       | se Asia    | Resident    |          | (72)       |
| Nectariniidae | Nectariniini    | Aethopyga       | boltoni         | Unknown       | se Asia    | Resident    |          | (72)       |
| Nectariniidae | Nectariniini    | Aethopyga       | flagrans        | Unknown       | se Asia    | Resident    |          | (72)       |
| Nectariniidae | Nectariniini    | Aethopyga       | pulcherrima     | Unknown       | se Asia    | Resident    | Endemic  | 3 (72)     |
| Nectariniidae | Nectariniini    | Aethopyga       | duyvenbodei     | Unknown       | se Asia    | Resident    |          | (72)       |
| Nectariniidae | Nectariniini    | Aethopyga       | shellei         | Unknown       | se Asia    | Resident    |          | 3 (72)     |
| Nectariniidae | Nectariniini    | Aethopyga       | gouldiae        | Pair          | se Asia    | Altitudinal |          | 2 (72)     |
| Nectariniidae | Nectariniini    | Aethopyga       | nipalensis      | Unknown       | se Asia    | Altitudinal |          | 2 (72)     |
| Nectariniidae | Nectariniini    | Aethopyga       | eximia          | Unknown       | se Asia    | Resident    |          | (72)       |
| Nectariniidae | Nectariniini    | Aethopyga       | christinae      | Unknown       | se Asia    | Migration   |          | 3 (72)     |
| Nectariniidae | Nectariniini    | Aethopyga       | saturata        | Pair          | se Asia    | Altitudinal |          | 2 (72)     |
| Nectariniidae | Nectariniini    | Aethopyga       | siparaja        | Unknown       | se Asia    | Altitudinal |          | 2 (72)     |
| Nectariniidae | Nectariniini    | Aethopyga       | mystacalis      | Unknown       | se Asia    | Resident    |          | (72)       |
| Nectariniidae | Nectariniini    | Aethopyga       | ignicauda       | Unknown       | se Asia    | Altitudinal |          | 2 (72)     |
| Nectariniidae | Nectariniini    | Arachnothera    | longirostra     | Pair          | se Asia    | Nomadic     |          | 2 (72)     |
| Nectariniidae | Nectariniini    | Arachnothera    | crassirostris   | Unknown       | se Asia    | Resident    |          | (72)       |
| Nectariniidae | Nectariniini    | Arachnothera    | robusta         | Unknown       | se Asia    | Resident    |          | 2 (72)     |
| Nectariniidae | Nectariniini    | Arachnothera    | flavigaster     | Unknown       | se Asia    | Resident    |          | (72)       |
| Nectariniidae | Nectariniini    | Arachnothera    | chrysoygenys    | Unknown       | se Asia    | Resident    |          | 2 (72)     |
| Nectariniidae | Nectariniini    | Arachnothera    | clarae          | Unknown       | se Asia    | Resident    |          | (72)       |
| Nectariniidae | Nectariniini    | Arachnothera    | affinis         | Unknown       | se Asia    | Resident    |          | 1 (72)     |
| Nectariniidae | Nectariniini    | Arachnothera    | everetti        | Unknown       | se Asia    | Resident    |          | 2 (72)     |
| Nectariniidae | Nectariniini    | Arachnothera    | magna           | Pair          | se Asia    | Altitudinal |          | 2 (72)     |
| Nectariniidae | Nectariniini    | Arachnothera    | juliae          | Unknown       | se Asia    | Resident    |          | (72)       |
| Paramythidae  | Paramythidae    | Oreocharis      | arfaki          | Unknown       | Australia  | Resident    |          | (87)       |
| Paramythidae  | Paramythidae    | Paramythia      | montium         | Pair          | Australia  | Resident    |          | 1 (82, 87) |
| Certhiidae    | Certhiini       | Certhia         | familiaris      | Pair          | Paleartic  | Partial     |          | 5 (221)    |
| Certhiidae    | Certhiini       | Certhia         | americana       | Pair          | Nearctic   | Partial     |          | 5 (221)    |
| Certhiidae    | Certhiini       | Certhia         | brachydactyla   | Pair          | Paleartic  | Resident    |          | 6 (221)    |
| Certhiidae    | Certhiini       | Certhia         | himalayana      | Pair          | Paleartic  | Altitudinal |          | 5 (221)    |
| Certhiidae    | Certhiini       | Certhia         | nipalensis      | Unknown       | Paleartic  | Resident    |          | (221)      |
| Certhiidae    | Certhiini       | Certhia         | discolor        | Unknown       | se Asia    | Resident    |          | 4 (221)    |
| Certhiidae    | Salpornithini   | Salpornis       | spilonotus      | Pair          | Widespread |             | Resident | 2 (221)    |
| Certhiidae    | Troglodytinae   | Donacobius      | atricapillus    | Cooperation   | America    | Resident    |          | (272, 407) |
| Certhiidae    | Troglodytinae   | Campylorhynchus | gularis         | Unknown       | America    | Resident    |          | 4 (54)     |
| Certhiidae    | Troglodytinae   | Campylorhynchus | brunneicapillus | Cooperation   | America    | Resident    |          | 4 (401)    |
| Certhiidae    | Troglodytinae   | Campylorhynchus | jocosus         | Cooperation   | America    | Resident    |          | 3 (54)     |
| Certhiidae    | Troglodytinae   | Campylorhynchus | yucatanicus     | Unknown       | America    | Resident    |          | (54)       |
| Certhiidae    | Troglodytinae   | Campylorhynchus | chiapensis      | Cooperation   | America    | Resident    |          | 3 (54)     |
| Certhiidae    | Troglodytinae   | Campylorhynchus | griseus         | Cooperation   | America    | Resident    |          | 4 (54)     |
| Certhiidae    | Troglodytinae   | Campylorhynchus | rufinucha       | Cooperation   | America    | Resident    |          | 4 (54)     |
| Certhiidae    | Troglodytinae   | Campylorhynchus | turdinus        | Suspected     | America    | Resident    |          | (235)      |
| Certhiidae    | Troglodytinae   | Campylorhynchus | megalopterus    | Cooperation   | America    | Resident    |          | (54)       |
| Certhiidae    | Troglodytinae   | Campylorhynchus | zonatus         | Cooperation   | America    | Resident    |          | 4 (54)     |
| Certhiidae    | Troglodytinae   | Campylorhynchus | albobrunneus    | Unknown       | America    | Resident    |          | (54)       |
| Certhiidae    | Troglodytinae   | Campylorhynchus | nuchalis        | Cooperation   | America    | Resident    |          | 4 (54)     |
| Certhiidae    | Troglodytinae   | Campylorhynchus | fasciatus       | Cooperation   | America    | Resident    |          | (54)       |
| Certhiidae    | Troglodytinae   | Odontorchilus   | branickii       | Unknown       | America    | Resident    |          | (54)       |
| Certhiidae    | Troglodytinae   | Odontorchilus   | cinereus        | Unknown       | America    | Resident    |          | (54)       |
| Certhiidae    | Troglodytinae   | Salpinctes      | obsoletus       | Pair          | Nearctic   | Partial     |          | 5 (310)    |
| Certhiidae    | Troglodytinae   | Catherpes       | mexicanus       | Pair          | Nearctic   | Resident    |          | 5 (265)    |
| Certhiidae    | Troglodytinae   | Hylorchilus     | sumichrasti     | Unknown       | America    | Resident    |          | 3 (54)     |
| Certhiidae    | Troglodytinae   | Cinnycerthia    | unirufa         | Unknown       | America    | Resident    |          | (54)       |
| Certhiidae    | Troglodytinae   | Cinnycerthia    | peruana         | Unknown       | America    | Resident    |          | (54)       |
| Certhiidae    | Troglodytinae   | Cistothorus     | platensis       | Uniparental   | America    | Migration   |          | 7 (226)    |
| Certhiidae    | Troglodytinae   | Cistothorus     | apolinari       | Unknown       | America    | Resident    |          | (54)       |
| Certhiidae    | Troglodytinae   | Cistothorus     | meridae         | Unknown       | America    | Resident    |          | (54)       |
| Certhiidae    | Troglodytinae   | Cistothorus     | palustris       | Pair          | Nearctic   | Migration   |          | 5 (279)    |
| Certhiidae    | Troglodytinae   | Thryomanes      | bewickii        | Pair          | Nearctic   | Partial     |          | 6 (270)    |
| Certhiidae    | Troglodytinae   | Thryomanes      | sissonii        | Unknown       | America    | Resident    | Endemic  | (54)       |
| Certhiidae    | Troglodytinae   | Ferminia        | cerverai        | Unknown       | America    | Resident    | Endemic  | 2 (54)     |
| Certhiidae    | Troglodytinae   | Thryothorus     | atrogularis     | Unknown       | America    | Resident    |          | (54)       |
| Certhiidae    | Troglodytinae   | Thryothorus     | spadix          | Unknown       | America    | Resident    |          | (54)       |
| Certhiidae    | Troglodytinae   | Thryothorus     | fasciatoventris | Pair          | America    | Resident    |          | (54)       |
| Certhiidae    | Troglodytinae   | Thryothorus     | euophrys        | Unknown       | America    | Resident    |          | (54)       |
| Certhiidae    | Troglodytinae   | Thryothorus     | eisenmanni      | Unknown       | America    | Resident    |          | (54)       |
| Certhiidae    | Troglodytinae   | Thryothorus     | mystacalis      | Unknown       | America    | Resident    |          | (54)       |
| Certhiidae    | Troglodytinae   | Thryothorus     | genibarbis      | Unknown       | America    | Resident    |          | (54)       |
| Certhiidae    | Troglodytinae   | Thryothorus     | coraya          | Unknown       | America    | Resident    |          | (54)       |
| Certhiidae    | Troglodytinae   | Thryothorus     | felix           | Unknown       | America    | Resident    |          | (54)       |
| Certhiidae    | Troglodytinae   | Thryothorus     | maculipectus    | Pair          | America    | Resident    |          | 3 (54)     |

| Family     | Clade Reference | Genus         | species        | Parental care | Region      | Movement  | Island  | Clutch  |
|------------|-----------------|---------------|----------------|---------------|-------------|-----------|---------|---------|
| Certhiidae | Troglodytinae   | Thryothorus   | rutilus        | Pair          | America     | Resident  |         | 3 (54)  |
| Certhiidae | Troglodytinae   | Thryothorus   | sclateri       | Unknown       | America     | Resident  |         | (54)    |
| Certhiidae | Troglodytinae   | Thryothorus   | semibadius     | Pair          | America     | Resident  |         | 2 (54)  |
| Certhiidae | Troglodytinae   | Thryothorus   | nigricapillus  | Pair          | America     | Resident  |         | 3 (54)  |
| Certhiidae | Troglodytinae   | Thryothorus   | thoracicus     | Pair          | America     | Resident  |         | 2 (54)  |
| Certhiidae | Troglodytinae   | Thryothorus   | leucopogon     | Unknown       | America     | Resident  |         | (54)    |
| Certhiidae | Troglodytinae   | Thryothorus   | pleurostictus  | Occasional    | America     | Resident  |         | 4 (54)  |
| Certhiidae | Troglodytinae   | Thryothorus   | ludovicianus   | Pair          | Nearctic    | Resident  |         | 4 (208) |
| Certhiidae | Troglodytinae   | Thryothorus   | rufalbus       | Pair          | America     | Resident  |         | 3 (3)   |
| Certhiidae | Troglodytinae   | Thryothorus   | nicefori       | Unknown       | America     | Resident  |         | (54)    |
| Certhiidae | Troglodytinae   | Thryothorus   | sinaloa        | Unknown       | America     | Resident  |         | 5 (54)  |
| Certhiidae | Troglodytinae   | Thryothorus   | modestus       | Unknown       | America     | Resident  |         | 2 (54)  |
| Certhiidae | Troglodytinae   | Thryothorus   | leucotis       | Pair          | America     | Resident  |         | 3 (3)   |
| Certhiidae | Troglodytinae   | Thryothorus   | superciliaris  | Unknown       | America     | Resident  |         | 2 (54)  |
| Certhiidae | Troglodytinae   | Thryothorus   | guarayanus     | Unknown       | America     | Resident  |         | (54)    |
| Certhiidae | Troglodytinae   | Thryothorus   | longirostris   | Unknown       | America     | Resident  |         | (54)    |
| Certhiidae | Troglodytinae   | Thryothorus   | griseus        | Unknown       | America     | Resident  |         | (54)    |
| Certhiidae | Troglodytinae   | Troglodytes   | troglodytes    | Pair          | Holarctic   | Partial   |         | 6 (103) |
| Certhiidae | Troglodytinae   | Troglodytes   | aedon          | Occasional    | Nearctic    | Migration | Endemic | 6 (262) |
| Certhiidae | Troglodytinae   | Troglodytes   | tanneri        | Unknown       | America     | Resident  |         | (54)    |
| Certhiidae | Troglodytinae   | Troglodytes   | rufociliatus   | Pair          | America     | Resident  |         | 3 (54)  |
| Certhiidae | Troglodytinae   | Troglodytes   | ochraceus      | Unknown       | America     | Resident  |         | (54)    |
| Certhiidae | Troglodytinae   | Troglodytes   | monticola      | Unknown       | America     | Resident  |         | (54)    |
| Certhiidae | Troglodytinae   | Troglodytes   | solstitialis   | Unknown       | America     | Resident  |         | 2 (54)  |
| Certhiidae | Troglodytinae   | Troglodytes   | rufulus        | Unknown       | America     | Resident  |         | (54)    |
| Certhiidae | Troglodytinae   | Thryorchilus  | browni         | Unknown       | America     | Resident  |         | 2 (54)  |
| Certhiidae | Troglodytinae   | Uropsila      | leucogastra    | Unknown       | America     | Resident  |         | 4 (54)  |
| Certhiidae | Troglodytinae   | Henicorhina   | leucosticta    | Pair          | America     | Resident  |         | 2 (54)  |
| Certhiidae | Troglodytinae   | Henicorhina   | leucophrys     | Pair          | America     | Resident  |         | 2 (54)  |
| Certhiidae | Troglodytinae   | Henicorhina   | leucoptera     | Unknown       | America     | Resident  |         | (54)    |
| Certhiidae | Troglodytinae   | Microcerculus | philomela      | Pair          | America     | Resident  |         | 2 (75)  |
| Certhiidae | Troglodytinae   | Microcerculus | marginatus     | Pair          | America     | Resident  |         | (54)    |
| Certhiidae | Troglodytinae   | Microcerculus | ustulatus      | Unknown       | America     | Resident  |         | (54)    |
| Certhiidae | Troglodytinae   | Microcerculus | bambula        | Unknown       | America     | Resident  |         | (266)   |
| Certhiidae | Troglodytinae   | Cyphorhinus   | phaeocephalus  | Group         | America     | Resident  |         | 2 (54)  |
| Certhiidae | Troglodytinae   | Cyphorhinus   | thoracicus     | Unknown       | America     | Resident  |         | (54)    |
| Certhiidae | Troglodytinae   | Cyphorhinus   | aradus         | Unknown       | America     | Resident  |         | 2 (54)  |
| Certhiidae | Poliophtilinae  | Auriparus     | flaviceps      | Pair          | Nearctic    | Resident  |         | 4 (512) |
| Certhiidae | Poliophtilinae  | Microbates    | collaris       | Unknown       | America     | Resident  |         | 2 (235) |
| Certhiidae | Poliophtilinae  | Microbates    | cinereiventris | Pair          | America     | Resident  |         | 2 (466) |
| Certhiidae | Poliophtilinae  | Ramphocaenus  | melanurus      | Pair          | America     | Resident  |         | 2 (454) |
| Certhiidae | Poliophtilinae  | Poliophtila   | caerulea       | Pair          | Nearctic    | Partial   |         | 4 (142) |
| Certhiidae | Poliophtilinae  | Poliophtila   | californica    | Occasional    | Nearctic    | Resident  |         | 4 (23)  |
| Certhiidae | Poliophtilinae  | Poliophtila   | melanura       | Pair          | Nearctic    | Resident  |         | 4 (26)  |
| Certhiidae | Poliophtilinae  | Poliophtila   | lambeyi        | Pair          | America     | Resident  | Endemic | 4 (178) |
| Certhiidae | Poliophtilinae  | Poliophtila   | nigriceps      | Pair          | Nearctic    | Resident  |         | 4 (26)  |
| Certhiidae | Poliophtilinae  | Poliophtila   | albiloris      | Pair          | America     | Resident  |         | 2 (466) |
| Certhiidae | Poliophtilinae  | Poliophtila   | plumbea        | Pair          | America     | Resident  |         | 2 (454) |
| Certhiidae | Poliophtilinae  | Poliophtila   | lactea         | Unknown       | America     | Resident  |         | (518)   |
| Certhiidae | Poliophtilinae  | Poliophtila   | guianensis     | Unknown       | America     | Resident  |         | (234)   |
| Certhiidae | Poliophtilinae  | Poliophtila   | schistaceigula | Unknown       | America     | Resident  |         | (235)   |
| Certhiidae | Poliophtilinae  | Poliophtila   | dumicola       | Unknown       | America     | Resident  |         | (413)   |
| Sittidae   | Sittinae        | Sitta         | europaea       | Pair          | Palaearctic | Resident  |         | 7 (221) |
| Sittidae   | Sittinae        | Sitta         | nagaensis      | Pair          | Palaearctic | Resident  |         | 3 (221) |
| Sittidae   | Sittinae        | Sitta         | cashmirensis   | Pair          | Palaearctic | Resident  |         | 6 (221) |
| Sittidae   | Sittinae        | Sitta         | castanea       | Pair          | se Asia     | Resident  |         | 5 (221) |
| Sittidae   | Sittinae        | Sitta         | himalayensis   | Pair          | Palaearctic | Resident  |         | 5 (221) |
| Sittidae   | Sittinae        | Sitta         | victoriae      | Unknown       | se Asia     | Resident  |         | (221)   |
| Sittidae   | Sittinae        | Sitta         | pygmaea        | Cooperation   | Nearctic    | Resident  |         | 7 (276) |
| Sittidae   | Sittinae        | Sitta         | pusilla        | Cooperation   | Nearctic    | Resident  |         | 5 (523) |
| Sittidae   | Sittinae        | Sitta         | whiteheadi     | Pair          | Palaearctic | Resident  | Endemic | 5 (221) |
| Sittidae   | Sittinae        | Sitta         | ledanti        | Pair          | Palaearctic | Resident  |         | (221)   |
| Sittidae   | Sittinae        | Sitta         | krueperi       | Pair          | Palaearctic | Resident  |         | 6 (221) |
| Sittidae   | Sittinae        | Sitta         | villosa        | Pair          | Palaearctic | Resident  |         | 5 (221) |
| Sittidae   | Sittinae        | Sitta         | yunnanensis    | Unknown       | Palaearctic | Resident  |         | (221)   |
| Sittidae   | Sittinae        | Sitta         | canadensis     | Pair          | Nearctic    | Resident  |         | 6 (221) |
| Sittidae   | Sittinae        | Sitta         | leucopsis      | Pair          | Palaearctic | Resident  |         | 7 (221) |
| Sittidae   | Sittinae        | Sitta         | carolinensis   | Pair          | Nearctic    | Resident  |         | 7 (221) |
| Sittidae   | Sittinae        | Sitta         | neumayer       | Pair          | Palaearctic | Resident  |         | 7 (221) |
| Sittidae   | Sittinae        | Sitta         | tephronota     | Pair          | Palaearctic | Resident  |         | 6 (221) |
| Sittidae   | Sittinae        | Sitta         | frontalis      | Pair          | se Asia     | Resident  |         | 4 (221) |
| Sittidae   | Sittinae        | Sitta         | solangiae      | Unknown       | se Asia     | Resident  |         | (221)   |
| Sittidae   | Sittinae        | Sitta         | oenochlamys    | Unknown       | se Asia     | Resident  |         | (221)   |



| Family       | Clade Reference | Genus           | species        | Parental care | Region    | Movement    | Island  | Clutch       |
|--------------|-----------------|-----------------|----------------|---------------|-----------|-------------|---------|--------------|
| Sittidae     | Sittinae        | Sitta           | azurea         | Unknown       | se Asia   | Resident    |         | 3 (221)      |
| Sittidae     | Sittinae        | Sitta           | magna          | Unknown       | se Asia   | Resident    |         | (221)        |
| Sittidae     | Sittinae        | Sitta           | formosa        | Unknown       | se Asia   | Resident    |         | 5 (221)      |
| Sittidae     | Tichodrominae   | Tichodroma      | muraria        | Pair          | Paleartic | Altitudinal |         | 4 (221)      |
| Cinclidae    | Cinclidae       | Cinclus         | cinclus        | Pair          | Paleartic | Partial     |         | 4 (519, 520) |
| Cinclidae    | Cinclidae       | Cinclus         | pallasii       | Pair          | Paleartic | Resident    |         | 5 (54)       |
| Cinclidae    | Cinclidae       | Cinclus         | mexicanus      | Pair          | Nearctic  | Partial     |         | 4 (380)      |
| Cinclidae    | Cinclidae       | Cinclus         | leucocephalus  | Unknown       | America   | Resident    |         | 2 (54)       |
| Cinclidae    | Cinclidae       | Cinclus         | schulzi        | Pair          | America   | Altitudinal |         | 2 (54)       |
| Muscicapidae | Turdinae        | Neocossyphus    | finschii       | Unknown       | Africa    | Resident    |         | (85)         |
| Muscicapidae | Turdinae        | Neocossyphus    | fraseri        | Pair          | Africa    | Resident    |         | 1 (85)       |
| Muscicapidae | Turdinae        | Neocossyphus    | rufus          | Pair          | Africa    | Resident    |         | 2 (85)       |
| Muscicapidae | Turdinae        | Neocossyphus    | poensis        | Unknown       | Africa    | Resident    |         | (85)         |
| Muscicapidae | Turdinae        | Pseudocossyphus | sharpei        | Unknown       | Africa    | Resident    |         | (85)         |
| Muscicapidae | Turdinae        | Pseudocossyphus | bensoni        | Unknown       | Africa    | Resident    |         | (85)         |
| Muscicapidae | Turdinae        | Pseudocossyphus | imerinus       | Unknown       | Africa    | Resident    |         | 2 (85)       |
| Muscicapidae | Turdinae        | Monticola       | rupestris      | Pair          | Africa    | Resident    |         | 3 (85)       |
| Muscicapidae | Turdinae        | Monticola       | explorator     | Pair          | Africa    | Resident    |         | 3 (496)      |
| Muscicapidae | Turdinae        | Monticola       | pretoripae     | Pair          | Africa    | Resident    |         | 3 (496)      |
| Muscicapidae | Turdinae        | Monticola       | angolensis     | Unknown       | Africa    | Resident    |         | (496)        |
| Muscicapidae | Turdinae        | Monticola       | angolensis     | Pair          | Africa    | Resident    |         | 3 (496)      |
| Muscicapidae | Turdinae        | Monticola       | saxatilis      | Occasional    | Paleartic | Migration   |         | 4 (103)      |
| Muscicapidae | Turdinae        | Monticola       | rufocinereus   | Pair          | Africa    | Resident    |         | 3 (85)       |
| Muscicapidae | Turdinae        | Monticola       | cinclorhynchus | Pair          | Paleartic | Migration   |         | 4 (85)       |
| Muscicapidae | Turdinae        | Monticola       | gularis        | Pair          | Paleartic | Migration   |         | 4 (85)       |
| Muscicapidae | Turdinae        | Monticola       | rufiventris    | Pair          | Paleartic | Altitudinal |         | 3 (85)       |
| Muscicapidae | Turdinae        | Monticola       | solitarius     | Pair          | Paleartic | Migration   |         | 4 (85)       |
| Muscicapidae | Turdinae        | Myophonus       | blighi         | Pair          | se Asia   | Resident    |         | 2 (92)       |
| Muscicapidae | Turdinae        | Myophonus       | melanurus      | Unknown       | se Asia   | Resident    |         | (85)         |
| Muscicapidae | Turdinae        | Myophonus       | glaucus        | Unknown       | se Asia   | Resident    |         | 2 (85)       |
| Muscicapidae | Turdinae        | Myophonus       | robinsoni      | Unknown       | se Asia   | Resident    |         | 1 (85)       |
| Muscicapidae | Turdinae        | Myophonus       | horsfieldii    | Pair          | se Asia   | Partial     |         | 3 (85)       |
| Muscicapidae | Turdinae        | Myophonus       | caeruleus      | Pair          | se Asia   | Partial     |         | 4 (85)       |
| Muscicapidae | Turdinae        | Myophonus       | insularis      | Pair          | Paleartic | Resident    |         | 3 (85)       |
| Muscicapidae | Turdinae        | Geomalia        | heinrichi      | Unknown       | Australia | Resident    |         | (85)         |
| Muscicapidae | Turdinae        | Zoothera        | schistacea     | Unknown       | Australia | Resident    | Endemic | (85)         |
| Muscicapidae | Turdinae        | Zoothera        | dumasi         | Unknown       | Australia | Resident    | Endemic | (85)         |
| Muscicapidae | Turdinae        | Zoothera        | interpres      | Pair          | se Asia   | Resident    |         | 2 (85)       |
| Muscicapidae | Turdinae        | Zoothera        | erythronota    | Unknown       | Australia | Resident    |         | (85)         |
| Muscicapidae | Turdinae        | Zoothera        | dohertyi       | Unknown       | Australia | Resident    | Endemic | (85)         |
| Muscicapidae | Turdinae        | Zoothera        | wardii         | Pair          | Paleartic | Migration   |         | 3 (85)       |
| Muscicapidae | Turdinae        | Zoothera        | cinerea        | Unknown       | se Asia   | Resident    |         | (85)         |
| Muscicapidae | Turdinae        | Zoothera        | peronii        | Unknown       | Australia | Resident    | Endemic | (85)         |
| Muscicapidae | Turdinae        | Zoothera        | citrina        | Pair          | se Asia   | Migration   |         | 4 (85)       |
| Muscicapidae | Turdinae        | Zoothera        | everetti       | Unknown       | se Asia   | Resident    |         | (85)         |
| Muscicapidae | Turdinae        | Zoothera        | sibirica       | Pair          | Paleartic | Migration   |         | 4 (85)       |
| Muscicapidae | Turdinae        | Zoothera        | naevia         | Pair          | Nearctic  | Partial     |         | 3 (85)       |
| Muscicapidae | Turdinae        | Zoothera        | pinicola       | Unknown       | America   | Resident    |         | 2 (85)       |
| Muscicapidae | Turdinae        | Zoothera        | piaggiae       | Pair          | Africa    | Resident    |         | 2 (85)       |
| Muscicapidae | Turdinae        | Zoothera        | tanganjicae    | Unknown       | Africa    | Resident    |         | (496)        |
| Muscicapidae | Turdinae        | Zoothera        | crossleyi      | Unknown       | Africa    | Altitudinal |         | (85)         |
| Muscicapidae | Turdinae        | Zoothera        | gurneyi        | Pair          | Africa    | Partial     |         | 2 (85)       |
| Muscicapidae | Turdinae        | Zoothera        | oberlaenderi   | Unknown       | Africa    | Resident    |         | (85)         |
| Muscicapidae | Turdinae        | Zoothera        | cameronensis   | Unknown       | Africa    | Resident    |         | (85)         |
| Muscicapidae | Turdinae        | Zoothera        | princei        | Pair          | Africa    | Resident    |         | 2 (85)       |
| Muscicapidae | Turdinae        | Zoothera        | kibalensis     | Unknown       | Africa    | Resident    |         | (496)        |
| Muscicapidae | Turdinae        | Zoothera        | guttata        | Unknown       | Africa    | Partial     |         | 3 (85)       |
| Muscicapidae | Turdinae        | Zoothera        | spiloptera     | Pair          | se Asia   | Resident    |         | 2 (85)       |
| Muscicapidae | Turdinae        | Zoothera        | andromedae     | Unknown       | se Asia   | Resident    |         | 2 (85)       |
| Muscicapidae | Turdinae        | Zoothera        | mollissima     | Pair          | Paleartic | Altitudinal |         | 4 (85)       |
| Muscicapidae | Turdinae        | Zoothera        | dixoni         | Unknown       | Paleartic | Altitudinal |         | 3 (85)       |
| Muscicapidae | Turdinae        | Zoothera        | dauma          | Pair          | Paleartic | Migration   |         | 2 (85)       |
| Muscicapidae | Turdinae        | Zoothera        | major          | Unknown       | Paleartic | Resident    | Endemic | (85)         |
| Muscicapidae | Turdinae        | Zoothera        | horsfieldi     | Unknown       | se Asia   | Migration   |         | 1 (85)       |
| Muscicapidae | Turdinae        | Zoothera        | machiki        | Unknown       | Australia | Resident    | Endemic | (85)         |
| Muscicapidae | Turdinae        | Zoothera        | lunulata       | Pair          | Australia | Resident    |         | 2 (85)       |
| Muscicapidae | Turdinae        | Zoothera        | heinei         | Pair          | Australia | Resident    |         | 2 (85)       |
| Muscicapidae | Turdinae        | Zoothera        | talaseae       | Unknown       | Australia | Resident    | Endemic | 2 (85)       |
| Muscicapidae | Turdinae        | Zoothera        | margaretae     | Unknown       | Australia | Resident    | Endemic | (85)         |
| Muscicapidae | Turdinae        | Zoothera        | monticola      | Unknown       | se Asia   | Altitudinal |         | 3 (85)       |
| Muscicapidae | Turdinae        | Zoothera        | marginata      | Pair          | se Asia   | Partial     |         | 3 (85)       |
| Muscicapidae | Turdinae        | Zoothera        | terrestris     | Unknown       | Paleartic | Resident    | Endemic | (85)         |
| Muscicapidae | Turdinae        | Cataponera      | turdoides      | Unknown       | Australia | Resident    |         | (85)         |

| Family       | Clade Reference | Genus         | species        | Parental care | Region      | Movement    | Island  | Clutch       |
|--------------|-----------------|---------------|----------------|---------------|-------------|-------------|---------|--------------|
| Muscicapidae | Turdinae        | Nesocichla    | eremita        | Pair          | Africa      | Resident    | Endemic | 3 (85)       |
| Muscicapidae | Turdinae        | Cichlherminia | lherminieri    | Unknown       | America     | Resident    | Endemic | 2 (85)       |
| Muscicapidae | Turdinae        | Sialia        | sialis         | Occasional    | Nearctic    | Partial     |         | 4 (192)      |
| Muscicapidae | Turdinae        | Sialia        | mexicana       | Cooperation   | Nearctic    | Partial     |         | 5 (122, 123) |
| Muscicapidae | Turdinae        | Sialia        | currucooides   | Occasional    | Nearctic    | Migration   |         | 6 (395)      |
| Muscicapidae | Turdinae        | Myadestes     | myadestinus    | Unknown       | America     | Resident    | Endemic | (85)         |
| Muscicapidae | Turdinae        | Myadestes     | oahensis       | Unknown       | America     | Resident    | Endemic | (85)         |
| Muscicapidae | Turdinae        | Myadestes     | lanaiensis     | Unknown       | America     | Resident    | Endemic | (85)         |
| Muscicapidae | Turdinae        | Myadestes     | obscurus       | Pair          | America     | Resident    | Endemic | 1 (85)       |
| Muscicapidae | Turdinae        | Myadestes     | palmeri        | Cooperation   | America     | Resident    | Endemic | 2 (461)      |
| Muscicapidae | Turdinae        | Myadestes     | townsendi      | Pair          | Nearctic    | Partial     |         | 4 (85)       |
| Muscicapidae | Turdinae        | Myadestes     | occidentalis   | Unknown       | America     | Resident    |         | 2 (85)       |
| Muscicapidae | Turdinae        | Myadestes     | elisabeth      | Unknown       | America     | Resident    | Endemic | 3 (85)       |
| Muscicapidae | Turdinae        | Myadestes     | genibarbis     | Unknown       | America     | Migration   | Endemic | 2 (85)       |
| Muscicapidae | Turdinae        | Myadestes     | melanops       | Unknown       | America     | Resident    |         | 2 (85)       |
| Muscicapidae | Turdinae        | Myadestes     | coloratus      | Unknown       | America     | Resident    |         | (85)         |
| Muscicapidae | Turdinae        | Myadestes     | ralloides      | Unknown       | America     | Resident    |         | 2 (85)       |
| Muscicapidae | Turdinae        | Myadestes     | unicolor       | Unknown       | America     | Altitudinal |         | (85)         |
| Muscicapidae | Turdinae        | Cichlopsis    | leucogenys     | Unknown       | America     | Resident    |         | (85)         |
| Muscicapidae | Turdinae        | Entomodestes  | leucotis       | Unknown       | America     | Resident    |         | (85)         |
| Muscicapidae | Turdinae        | Entomodestes  | coracinus      | Unknown       | America     | Resident    |         | 2 (85)       |
| Muscicapidae | Turdinae        | Catharus      | gracilirostris | Unknown       | America     | Resident    |         | 2 (85)       |
| Muscicapidae | Turdinae        | Catharus      | aurantiiostris | Unknown       | America     | Resident    |         | 2 (85)       |
| Muscicapidae | Turdinae        | Catharus      | fuscater       | Unknown       | America     | Resident    |         | 2 (85)       |
| Muscicapidae | Turdinae        | Catharus      | occidentalis   | Unknown       | America     | Resident    |         | 2 (85)       |
| Muscicapidae | Turdinae        | Catharus      | frantzii       | Pair          | America     | Resident    |         | 2 (85)       |
| Muscicapidae | Turdinae        | Catharus      | mexicanus      | Unknown       | America     | Resident    |         | 2 (85)       |
| Muscicapidae | Turdinae        | Catharus      | dryas          | Unknown       | America     | Resident    |         | (85)         |
| Muscicapidae | Turdinae        | Catharus      | fuscescens     | Pair          | Nearctic    | Migration   |         | 4 (85)       |
| Muscicapidae | Turdinae        | Catharus      | minimus        | Pair          | Nearctic    | Migration   |         | 4 (85)       |
| Muscicapidae | Turdinae        | Catharus      | bicknelli      | Cooperation   | Nearctic    | Migration   |         | 3 (414)      |
| Muscicapidae | Turdinae        | Catharus      | ustulatus      | Pair          | Nearctic    | Migration   |         | 3 (85)       |
| Muscicapidae | Turdinae        | Catharus      | guttatus       | Pair          | Nearctic    | Migration   |         | 3 (85)       |
| Muscicapidae | Turdinae        | Catharus      | mustelinus     | Pair          | Nearctic    | Migration   |         | 3 (85)       |
| Muscicapidae | Turdinae        | Platycichla   | flavipes       | Unknown       | America     | Partial     |         | 2 (85)       |
| Muscicapidae | Turdinae        | Platycichla   | leucops        | Unknown       | America     | Resident    |         | (85)         |
| Muscicapidae | Turdinae        | Psophocichla  | litsipsirupa   | Cooperation   | Africa      | Resident    |         | 3 (85)       |
| Muscicapidae | Turdinae        | Turdus        | pelios         | Pair          | Africa      | Resident    |         | 2 (85)       |
| Muscicapidae | Turdinae        | Turdus        | tephronotus    | Unknown       | Africa      | Resident    |         | 2 (85)       |
| Muscicapidae | Turdinae        | Turdus        | libonyanus     | Pair          | Africa      | Resident    |         | 3 (85)       |
| Muscicapidae | Turdinae        | Turdus        | olivaceofuscus | Unknown       | Africa      | Resident    | Endemic | 2 (85)       |
| Muscicapidae | Turdinae        | Turdus        | olivaceus      | Pair          | Africa      | Resident    |         | 2 (85)       |
| Muscicapidae | Turdinae        | Turdus        | menachensis    | Unknown       | Palaearctic | Partial     |         | (85)         |
| Muscicapidae | Turdinae        | Turdus        | bewsheri       | Unknown       | Africa      | Resident    | Endemic | (85)         |
| Muscicapidae | Turdinae        | Turdus        | hortulorum     | Pair          | Palaearctic | Migration   |         | 4 (85)       |
| Muscicapidae | Turdinae        | Turdus        | unicolor       | Pair          | Palaearctic | Altitudinal |         | 4 (85)       |
| Muscicapidae | Turdinae        | Turdus        | dissimilis     | Pair          | Palaearctic | Altitudinal |         | 3 (85)       |
| Muscicapidae | Turdinae        | Turdus        | cardis         | Pair          | Palaearctic | Migration   |         | 4 (85)       |
| Muscicapidae | Turdinae        | Turdus        | albicinctus    | Pair          | Palaearctic | Altitudinal |         | 3 (85)       |
| Muscicapidae | Turdinae        | Turdus        | torquatus      | Pair          | Palaearctic | Partial     |         | 4 (85)       |
| Muscicapidae | Turdinae        | Turdus        | boulboul       | Pair          | Palaearctic | Altitudinal |         | 3 (85)       |
| Muscicapidae | Turdinae        | Turdus        | merula         | Pair          | Palaearctic | Partial     |         | 4 (85)       |
| Muscicapidae | Turdinae        | Turdus        | poliocephalus  | Pair          | se Asia     | Resident    |         | 2 (85)       |
| Muscicapidae | Turdinae        | Turdus        | rubrocanus     | Pair          | Palaearctic | Altitudinal |         | 3 (85)       |
| Muscicapidae | Turdinae        | Turdus        | kessleri       | Unknown       | Palaearctic | Altitudinal |         | (85)         |
| Muscicapidae | Turdinae        | Turdus        | feae           | Pair          | Palaearctic | Migration   |         | 4 (92)       |
| Muscicapidae | Turdinae        | Turdus        | obscurus       | Pair          | Palaearctic | Migration   |         | 5 (85)       |
| Muscicapidae | Turdinae        | Turdus        | pallidus       | Pair          | Palaearctic | Migration   |         | 4 (85)       |
| Muscicapidae | Turdinae        | Turdus        | chrysolaus     | Pair          | Palaearctic | Migration   |         | 2 (85)       |
| Muscicapidae | Turdinae        | Turdus        | celaenops      | Pair          | Palaearctic | Resident    | Endemic | 3 (85)       |
| Muscicapidae | Turdinae        | Turdus        | ruficollis     | Pair          | Palaearctic | Migration   |         | (85)         |
| Muscicapidae | Turdinae        | Turdus        | naumanni       | Pair          | Palaearctic | Migration   |         | 4 (85)       |
| Muscicapidae | Turdinae        | Turdus        | pilaris        | Pair          | Palaearctic | Migration   |         | 5 (85)       |
| Muscicapidae | Turdinae        | Turdus        | iliacus        | Pair          | Palaearctic | Migration   |         | 5 (85)       |
| Muscicapidae | Turdinae        | Turdus        | philomelos     | Pair          | Palaearctic | Partial     |         | 4 (85)       |
| Muscicapidae | Turdinae        | Turdus        | pinpinensis    | Unknown       | Palaearctic | Partial     |         | 3 (85)       |
| Muscicapidae | Turdinae        | Turdus        | viscivorus     | Pair          | Palaearctic | Partial     |         | 4 (85)       |
| Muscicapidae | Turdinae        | Turdus        | aurantius      | Pair          | America     | Resident    | Endemic | 3 (85)       |
| Muscicapidae | Turdinae        | Turdus        | ravidus        | Unknown       | America     | Resident    | Endemic | (85)         |
| Muscicapidae | Turdinae        | Turdus        | plumbeus       | Pair          | America     | Resident    | Endemic | (85)         |
| Muscicapidae | Turdinae        | Turdus        | chiguanco      | Unknown       | America     | Partial     |         | (85)         |
| Muscicapidae | Turdinae        | Turdus        | nigrescens     | Unknown       | America     | Resident    |         | 2 (85)       |
| Muscicapidae | Turdinae        | Turdus        | fuscater       | Pair          | America     | Resident    |         | 2 (85)       |

| Family       | Clade Reference | Genus          | species        | Parental care | Region     | Movement    | Island    | Clutch    |
|--------------|-----------------|----------------|----------------|---------------|------------|-------------|-----------|-----------|
| Muscicapidae | Turdinae        | Turdus         | infuscatus     | Unknown       | America    | Partial     |           | (85)      |
| Muscicapidae | Turdinae        | Turdus         | serranus       | Pair          | America    | Partial     | 2         | (85)      |
| Muscicapidae | Turdinae        | Turdus         | nigriceps      | Unknown       | America    | Partial     | 3         | (85)      |
| Muscicapidae | Turdinae        | Turdus         | subalaris      | Unknown       | America    | Partial     |           | (85)      |
| Muscicapidae | Turdinae        | Turdus         | reevei         | Unknown       | America    | Partial     |           | (85)      |
| Muscicapidae | Turdinae        | Turdus         | olivater       | Unknown       | America    | Resident    | 2         | (85)      |
| Muscicapidae | Turdinae        | Turdus         | maranonicus    | Unknown       | America    | Resident    |           | (85)      |
| Muscicapidae | Turdinae        | Turdus         | fulviventris   | Unknown       | America    | Resident    |           | (85)      |
| Muscicapidae | Turdinae        | Turdus         | rufiventris    | Pair          | America    | Resident    | 3         | (85)      |
| Muscicapidae | Turdinae        | Turdus         | falcklandii    | Pair          | America    | Resident    | 2         | (85)      |
| Muscicapidae | Turdinae        | Turdus         | leucomelas     | Pair          | America    | Resident    | 2         | (85)      |
| Muscicapidae | Turdinae        | Turdus         | amaurochalinus | Unknown       | America    | Partial     | 3         | (85)      |
| Muscicapidae | Turdinae        | Turdus         | plebejus       | Pair          | America    | Resident    | 2         | (85)      |
| Muscicapidae | Turdinae        | Turdus         | ignobilis      | Unknown       | America    | Resident    | 2         | (85)      |
| Muscicapidae | Turdinae        | Turdus         | lawrencii      | Unknown       | America    | Resident    |           | (85, 234) |
| Muscicapidae | Turdinae        | Turdus         | obsoletus      | Pair          | America    | Resident    | 2         | (85)      |
| Muscicapidae | Turdinae        | Turdus         | fumigatus      | Pair          | America    | Resident    | 2         | (85)      |
| Muscicapidae | Turdinae        | Turdus         | hauxwelli      | Unknown       | America    | Resident    |           | (85)      |
| Muscicapidae | Turdinae        | Turdus         | grayi          | Pair          | America    | Resident    | 3         | (85)      |
| Muscicapidae | Turdinae        | Turdus         | nudigenis      | Pair          | America    | Resident    | 3         | (85)      |
| Muscicapidae | Turdinae        | Turdus         | maculirostris  | Pair          | America    | Resident    | 3         | (85)      |
| Muscicapidae | Turdinae        | Turdus         | haplochrous    | Unknown       | America    | Resident    |           | (85)      |
| Muscicapidae | Turdinae        | Turdus         | jamaicensis    | Unknown       | America    | Partial     | Endemic 2 | (85)      |
| Muscicapidae | Turdinae        | Turdus         | assimilis      | Unknown       | America    | Partial     | 2         | (85)      |
| Muscicapidae | Turdinae        | Turdus         | albicollis     | Pair          | America    | Resident    | 3         | (85)      |
| Muscicapidae | Turdinae        | Turdus         | rufopalliatu   | Unknown       | America    | Resident    |           | (85)      |
| Muscicapidae | Turdinae        | Turdus         | graysoni       | Unknown       | America    | Resident    | Endemic   | (85)      |
| Muscicapidae | Turdinae        | Turdus         | swalesi        | Unknown       | America    | Resident    | Endemic 2 | (85)      |
| Muscicapidae | Turdinae        | Turdus         | migratorius    | Pair          | Nearctic   | Migration   | 4         | (85)      |
| Muscicapidae | Turdinae        | Turdus         | rufitorques    | Pair          | America    | Resident    | 3         | (85)      |
| Muscicapidae | Turdinae        | Chlamydochaera | jefferyi       | Unknown       | se Asia    | Resident    |           | (459)     |
| Muscicapidae | Turdinae        | Brachypteryx   | stellata       | Unknown       | se Asia    | Altitudinal |           | (8)       |
| Muscicapidae | Turdinae        | Brachypteryx   | hypertyra      | Unknown       | se Asia    | Altitudinal |           | (92)      |
| Muscicapidae | Turdinae        | Brachypteryx   | major          | Unknown       | se Asia    | Resident    | 2         | (92)      |
| Muscicapidae | Turdinae        | Brachypteryx   | leucophrys     | Pair          | se Asia    | Altitudinal | 3         | (8)       |
| Muscicapidae | Turdinae        | Brachypteryx   | montana        | Pair          | se Asia    | Partial     | 2         | (271)     |
| Muscicapidae | Turdinae        | Heinrichia     | calligyna      | Unknown       | Australia  | Resident    |           | (88)      |
| Muscicapidae | Turdinae        | Alethe         | poliocephala   | Unknown       | Africa     | Resident    | 2         | (269)     |
| Muscicapidae | Turdinae        | Alethe         | poliophrys     | Unknown       | Africa     | Resident    | 2         | (269)     |
| Muscicapidae | Turdinae        | Alethe         | fuelleborni    | Pair          | Africa     | Resident    | 2         | (269)     |
| Muscicapidae | Turdinae        | Alethe         | choloensis     | Unknown       | Africa     | Resident    | 3         | (269)     |
| Muscicapidae | Turdinae        | Alethe         | diademata      | Pair          | Africa     | Resident    | 2         | (269)     |
| Muscicapidae | Turdinae        | Alethe         | castanea       | Unknown       | Africa     | Resident    | 2         | (269)     |
| Muscicapidae | Muscicapini     | Empidonis      | semipartitus   | Pair          | Africa     | Resident    | 2         | (496)     |
| Muscicapidae | Muscicapini     | Bradornis      | pallidus       | Suspected     | Africa     | Resident    | 3         | (496)     |
| Muscicapidae | Muscicapini     | Bradornis      | infuscatus     | Pair          | Africa     | Resident    | 3         | (496)     |
| Muscicapidae | Muscicapini     | Bradornis      | mariquensis    | Cooperation   | Africa     | Resident    | 3         | (496)     |
| Muscicapidae | Muscicapini     | Bradornis      | pumilus        | Unknown       | Africa     | Resident    |           | (496)     |
| Muscicapidae | Muscicapini     | Bradornis      | microrhynchus  | Pair          | Africa     | Resident    | 2         | (496)     |
| Muscicapidae | Muscicapini     | Dioptrornis    | chocolatinus   | Cooperation   | Africa     | Resident    |           | (201)     |
| Muscicapidae | Muscicapini     | Dioptrornis    | fischeri       | Unknown       | Africa     | Resident    |           | (496)     |
| Muscicapidae | Muscicapini     | Dioptrornis    | brunneus       | Suspected     | Africa     | Resident    | 3         | (496)     |
| Muscicapidae | Muscicapini     | Melaenornis    | edolioides     | Unknown       | Africa     | Resident    | 2         | (496)     |
| Muscicapidae | Muscicapini     | Melaenornis    | pammelaina     | Unknown       | Africa     | Resident    | 3         | (496)     |
| Muscicapidae | Muscicapini     | Melaenornis    | ardesiacus     | Unknown       | Africa     | Resident    | 2         | (496)     |
| Muscicapidae | Muscicapini     | Melaenornis    | annamarulae    | Unknown       | Africa     | Resident    |           | (496)     |
| Muscicapidae | Muscicapini     | Fraseria       | ocreata        | Cooperation   | Africa     | Resident    | 3         | (496)     |
| Muscicapidae | Muscicapini     | Fraseria       | cinerascens    | Pair          | Africa     | Resident    | 2         | (496)     |
| Muscicapidae | Muscicapini     | Sigelus        | silens         | Unknown       | Africa     | Resident    | 3         | (496)     |
| Muscicapidae | Muscicapini     | Rhinomyias     | addita         | Unknown       | se Asia    | Resident    | Endemic   | (88)      |
| Muscicapidae | Muscicapini     | Rhinomyias     | oscillans      | Unknown       | se Asia    | Resident    | Endemic   | (88)      |
| Muscicapidae | Muscicapini     | Rhinomyias     | brunneata      | Unknown       | Palearctic | Migration   |           | (92)      |
| Muscicapidae | Muscicapini     | Rhinomyias     | olivacea       | Unknown       | se Asia    | Resident    | 2         | (459)     |
| Muscicapidae | Muscicapini     | Rhinomyias     | umbratilis     | Unknown       | se Asia    | Resident    |           | (459)     |
| Muscicapidae | Muscicapini     | Rhinomyias     | ruficauda      | Unknown       | se Asia    | Resident    |           | (271)     |
| Muscicapidae | Muscicapini     | Rhinomyias     | colonus        | Unknown       | se Asia    | Resident    |           | (88)      |
| Muscicapidae | Muscicapini     | Rhinomyias     | gularis        | Unknown       | se Asia    | Resident    |           | (459)     |
| Muscicapidae | Muscicapini     | Rhinomyias     | insignis       | Unknown       | se Asia    | Resident    |           | (92)      |
| Muscicapidae | Muscicapini     | Rhinomyias     | albigularis    | Unknown       | se Asia    | Resident    |           | (92)      |
| Muscicapidae | Muscicapini     | Rhinomyias     | goodfellowi    | Unknown       | se Asia    | Resident    |           | (271)     |
| Muscicapidae | Muscicapini     | Muscicapa      | striata        | Pair          | Palearctic | Migration   | 4         | (105)     |
| Muscicapidae | Muscicapini     | Muscicapa      | gambagae       | Unknown       | Africa     | Partial     | 2         | (496)     |
| Muscicapidae | Muscicapini     | Muscicapa      | griseisticta   | Unknown       | Palearctic | Migration   |           | (158)     |

| Family       | Clade Reference | Genus      | species       | Parental care | Region    | Movement    | Island  | Clutch     |
|--------------|-----------------|------------|---------------|---------------|-----------|-------------|---------|------------|
| Muscicapidae | Muscicapini     | Muscicapa  | sibirica      | Pair          | Paleartic | Migration   |         | 4 (52)     |
| Muscicapidae | Muscicapini     | Muscicapa  | daurica       | Pair          | Paleartic | Migration   |         | 4 (52)     |
| Muscicapidae | Muscicapini     | Muscicapa  | randi         | Unknown       | se Asia   | Resident    | Endemic | (271)      |
| Muscicapidae | Muscicapini     | Muscicapa  | segregata     | Unknown       | se Asia   | Resident    |         | (46)       |
| Muscicapidae | Muscicapini     | Muscicapa  | ruficauda     | Pair          | Paleartic | Migration   |         | 3 (7)      |
| Muscicapidae | Muscicapini     | Muscicapa  | muttui        | Pair          | Paleartic | Migration   |         | 4 (7)      |
| Muscicapidae | Muscicapini     | Muscicapa  | ferruginea    | Pair          | Paleartic | Migration   |         | 2 (7)      |
| Muscicapidae | Muscicapini     | Muscicapa  | ussheri       | Unknown       | Africa    | Resident    |         | (496)      |
| Muscicapidae | Muscicapini     | Muscicapa  | infuscata     | Cooperation   | Africa    | Resident    |         | (496)      |
| Muscicapidae | Muscicapini     | Muscicapa  | boehmi        | Unknown       | Africa    | Resident    |         | 4 (496)    |
| Muscicapidae | Muscicapini     | Muscicapa  | aquatica      | Pair          | Africa    | Resident    |         | 2 (496)    |
| Muscicapidae | Muscicapini     | Muscicapa  | olivascens    | Unknown       | Africa    | Resident    |         | (496)      |
| Muscicapidae | Muscicapini     | Muscicapa  | lendu         | Unknown       | Africa    | Resident    |         | 2 (496)    |
| Muscicapidae | Muscicapini     | Muscicapa  | itombwensis   | Unknown       | Africa    | Resident    |         | (496)      |
| Muscicapidae | Muscicapini     | Muscicapa  | adusta        | Pair          | Africa    | Resident    |         | 3 (496)    |
| Muscicapidae | Muscicapini     | Muscicapa  | epulata       | Pair          | Africa    | Resident    |         | 3 (496)    |
| Muscicapidae | Muscicapini     | Muscicapa  | sethsmithi    | Pair          | Africa    | Resident    |         | 2 (496)    |
| Muscicapidae | Muscicapini     | Muscicapa  | comitata      | Pair          | Africa    | Resident    |         | 2 (496)    |
| Muscicapidae | Muscicapini     | Muscicapa  | tessmanni     | Unknown       | Africa    | Resident    |         | (496)      |
| Muscicapidae | Muscicapini     | Muscicapa  | cassini       | Pair          | Africa    | Resident    |         | 2 (496)    |
| Muscicapidae | Muscicapini     | Muscicapa  | caerulescens  | Pair          | Africa    | Resident    |         | 3 (496)    |
| Muscicapidae | Muscicapini     | Myioparus  | griseigularis | Pair          | Africa    | Resident    |         | 2 (496)    |
| Muscicapidae | Muscicapini     | Myioparus  | plumbeus      | Pair          | Africa    | Resident    |         | 2 (496)    |
| Muscicapidae | Muscicapini     | Humblotia  | flaviostris   | Unknown       | Africa    | Resident    | Endemic | (46)       |
| Muscicapidae | Muscicapini     | Ficedula   | hypoleuca     | Occasional    | Paleartic | Migration   |         | 6 (105)    |
| Muscicapidae | Muscicapini     | Ficedula   | albicollis    | Occasional    | Paleartic | Migration   |         | 6 (105)    |
| Muscicapidae | Muscicapini     | Ficedula   | semitorquata  | Pair          | Paleartic | Migration   |         | 5 (105)    |
| Muscicapidae | Muscicapini     | Ficedula   | zanthopygia   | Pair          | Paleartic | Migration   |         | (288)      |
| Muscicapidae | Muscicapini     | Ficedula   | narcissina    | Pair          | Paleartic | Migration   |         | 4 (52)     |
| Muscicapidae | Muscicapini     | Ficedula   | mugimaki      | Pair          | Paleartic | Migration   |         | 6 (158)    |
| Muscicapidae | Muscicapini     | Ficedula   | hodgsonii     | Pair          | se Asia   | Altitudinal |         | 4 (7)      |
| Muscicapidae | Muscicapini     | Ficedula   | strophhiata   | Pair          | Paleartic | Altitudinal |         | 3 (7)      |
| Muscicapidae | Muscicapini     | Ficedula   | parva         | Pair          | Paleartic | Migration   |         | 5 (105)    |
| Muscicapidae | Muscicapini     | Ficedula   | subrubra      | Pair          | se Asia   | Migration   |         | 4 (92)     |
| Muscicapidae | Muscicapini     | Ficedula   | monileger     | Pair          | se Asia   | Resident    |         | 4 (7)      |
| Muscicapidae | Muscicapini     | Ficedula   | solitarius    | Pair          | se Asia   | Resident    |         | 2 (305)    |
| Muscicapidae | Muscicapini     | Ficedula   | hyperythra    | Pair          | se Asia   | Altitudinal |         | 3 (7)      |
| Muscicapidae | Muscicapini     | Ficedula   | dumetoria     | Unknown       | se Asia   | Resident    |         | (459)      |
| Muscicapidae | Muscicapini     | Ficedula   | rufigula      | Unknown       | se Asia   | Resident    |         | (88)       |
| Muscicapidae | Muscicapini     | Ficedula   | buruensis     | Unknown       | se Asia   | Resident    | Endemic | (88)       |
| Muscicapidae | Muscicapini     | Ficedula   | basilanica    | Unknown       | se Asia   | Resident    |         | (92)       |
| Muscicapidae | Muscicapini     | Ficedula   | henrici       | Unknown       | se Asia   | Resident    | Endemic | (92)       |
| Muscicapidae | Muscicapini     | Ficedula   | harterti      | Unknown       | se Asia   | Resident    | Endemic | (88)       |
| Muscicapidae | Muscicapini     | Ficedula   | platenae      | Unknown       | se Asia   | Resident    |         | (92)       |
| Muscicapidae | Muscicapini     | Ficedula   | crypta        | Unknown       | se Asia   | Resident    |         | (92)       |
| Muscicapidae | Muscicapini     | Ficedula   | bonthaina     | Unknown       | se Asia   | Resident    |         | (271)      |
| Muscicapidae | Muscicapini     | Ficedula   | westermanni   | Pair          | se Asia   | Altitudinal |         | 3 (7)      |
| Muscicapidae | Muscicapini     | Ficedula   | superciliaris | Pair          | se Asia   | Altitudinal |         | 4 (7)      |
| Muscicapidae | Muscicapini     | Ficedula   | tricolor      | Unknown       | se Asia   | Altitudinal |         | 3 (7)      |
| Muscicapidae | Muscicapini     | Ficedula   | sapphira      | Pair          | se Asia   | Altitudinal |         | 4 (7)      |
| Muscicapidae | Muscicapini     | Ficedula   | nigrorufa     | Pair          | se Asia   | Resident    |         | 2 (7)      |
| Muscicapidae | Muscicapini     | Ficedula   | timorensis    | Unknown       | se Asia   | Resident    | Endemic | (88)       |
| Muscicapidae | Muscicapini     | Cyanoptila | cyanomelana   | Pair          | Paleartic | Migration   |         | 4 (7)      |
| Muscicapidae | Muscicapini     | Eumyias    | thalassina    | Pair          | se Asia   | Partial     |         | 2 (7)      |
| Muscicapidae | Muscicapini     | Eumyias    | sordida       | Unknown       | se Asia   | Resident    |         | 2 (7)      |
| Muscicapidae | Muscicapini     | Eumyias    | panayensis    | Unknown       | se Asia   | Resident    |         | (271)      |
| Muscicapidae | Muscicapini     | Eumyias    | albicaudata   | Unknown       | se Asia   | Resident    |         | 3 (7, 305) |
| Muscicapidae | Muscicapini     | Eumyias    | indigo        | Unknown       | se Asia   | Resident    |         | (459)      |
| Muscicapidae | Muscicapini     | Niltava    | grandis       | Pair          | se Asia   | Resident    |         | 2 (7)      |
| Muscicapidae | Muscicapini     | Niltava    | macgrigoriae  | Pair          | se Asia   | Altitudinal |         | 4 (7)      |
| Muscicapidae | Muscicapini     | Niltava    | davidi        | Unknown       | se Asia   | Altitudinal |         | (320)      |
| Muscicapidae | Muscicapini     | Niltava    | sundara       | Pair          | se Asia   | Altitudinal |         | 4 (7)      |
| Muscicapidae | Muscicapini     | Niltava    | sumatrana     | Unknown       | se Asia   | Resident    |         | (305)      |
| Muscicapidae | Muscicapini     | Niltava    | vivida        | Unknown       | se Asia   | Altitudinal |         | (7)        |
| Muscicapidae | Muscicapini     | Cyornis    | sanfordi      | Unknown       | se Asia   | Resident    |         | (92)       |
| Muscicapidae | Muscicapini     | Cyornis    | hoevelli      | Unknown       | se Asia   | Resident    |         | (88)       |
| Muscicapidae | Muscicapini     | Cyornis    | hyacinthinus  | Unknown       | se Asia   | Resident    | Endemic | (88)       |
| Muscicapidae | Muscicapini     | Cyornis    | concretus     | Unknown       | se Asia   | Altitudinal |         | (7)        |
| Muscicapidae | Muscicapini     | Cyornis    | ruckii        | Unknown       | se Asia   | Resident    |         | (92)       |
| Muscicapidae | Muscicapini     | Cyornis    | herioti       | Unknown       | se Asia   | Resident    |         | (271)      |
| Muscicapidae | Muscicapini     | Cyornis    | hainanus      | Unknown       | se Asia   | Partial     |         | (320)      |
| Muscicapidae | Muscicapini     | Cyornis    | pallipes      | Unknown       | se Asia   | Resident    |         | 4 (7)      |
| Muscicapidae | Muscicapini     | Cyornis    | poliogenys    | Pair          | se Asia   | Resident    |         | 4 (7)      |

| Family       | Clade Reference | Genus         | species       | Parental care | Region     | Movement    | Island    | Clutch     |
|--------------|-----------------|---------------|---------------|---------------|------------|-------------|-----------|------------|
| Muscicapidae | Muscicapini     | Cyornis       | unicolor      | Pair          | se Asia    | Altitudinal |           | 4 (7)      |
| Muscicapidae | Muscicapini     | Cyornis       | rubeculoides  | Pair          | se Asia    | Altitudinal |           | 4 (7)      |
| Muscicapidae | Muscicapini     | Cyornis       | banyumas      | Unknown       | se Asia    | Migration   |           | 4 (7)      |
| Muscicapidae | Muscicapini     | Cyornis       | lemprieri     | Unknown       | se Asia    | Resident    |           | (271)      |
| Muscicapidae | Muscicapini     | Cyornis       | superbus      | Unknown       | se Asia    | Resident    |           | (459)      |
| Muscicapidae | Muscicapini     | Cyornis       | caerulatus    | Unknown       | se Asia    | Resident    |           | (459)      |
| Muscicapidae | Muscicapini     | Cyornis       | turcosus      | Unknown       | se Asia    | Resident    |           | (459)      |
| Muscicapidae | Muscicapini     | Cyornis       | tickelliae    | Unknown       | se Asia    | Resident    | 4         | (271)      |
| Muscicapidae | Muscicapini     | Cyornis       | rufigaster    | Unknown       | se Asia    | Resident    | 2         | (271, 305) |
| Muscicapidae | Muscicapini     | Cyornis       | omissus       | Unknown       | se Asia    | Resident    |           | no source  |
| Muscicapidae | Muscicapini     | Muscicapella  | hodgsoni      | Unknown       | se Asia    | Altitudinal | 4         | (7)        |
| Muscicapidae | Muscicapini     | Culicicapa    | ceylonensis   | Pair          | se Asia    | Partial     | 3         | (7, 305)   |
| Muscicapidae | Muscicapini     | Culicicapa    | helianthea    | Unknown       | se Asia    | Resident    |           | (271)      |
| Muscicapidae | Muscicapini     | Horzorninus   | dohrni        | Suspected     | Africa     | Resident    | Endemic 2 | (174)      |
| Muscicapidae | Saxicolini      | Pogonocichla  | stellata      | Pair          | Africa     | Partial     | 3         | (269)      |
| Muscicapidae | Saxicolini      | Swynnertonia  | swynnertoni   | Pair          | Africa     | Resident    | 2         | (269)      |
| Muscicapidae | Saxicolini      | Stiphornis    | erythrothorax | Pair          | Africa     | Resident    | 2         | (269)      |
| Muscicapidae | Saxicolini      | Sheppardia    | poensis       | Unknown       | Africa     | Resident    |           | (269)      |
| Muscicapidae | Saxicolini      | Sheppardia    | bocagei       | Unknown       | Africa     | Resident    | 2         | (269)      |
| Muscicapidae | Saxicolini      | Sheppardia    | cyornithopsis | Unknown       | Africa     | Resident    | 2         | (269)      |
| Muscicapidae | Saxicolini      | Sheppardia    | aequatorialis | Pair          | Africa     | Resident    | 2         | (269)      |
| Muscicapidae | Saxicolini      | Sheppardia    | sharpei       | Unknown       | Africa     | Resident    | 2         | (269)      |
| Muscicapidae | Saxicolini      | Sheppardia    | gunningi      | Unknown       | Africa     | Resident    |           | (360)      |
| Muscicapidae | Saxicolini      | Sheppardia    | gabala        | Unknown       | Africa     | Resident    |           | (269)      |
| Muscicapidae | Saxicolini      | Sheppardia    | montana       | Unknown       | Africa     | Resident    |           | (269)      |
| Muscicapidae | Saxicolini      | Sheppardia    | lowei         | Unknown       | Africa     | Resident    |           | (269)      |
| Muscicapidae | Saxicolini      | Erithacus     | rubecula      | Occasional    | Palearctic | Partial     | 5         | (103)      |
| Muscicapidae | Saxicolini      | Erithacus     | akahige       | Pair          | Palearctic | Migration   | 4         | (52)       |
| Muscicapidae | Saxicolini      | Erithacus     | komadori      | Pair          | Palearctic | Resident    | Endemic   | (229)      |
| Muscicapidae | Saxicolini      | Luscinia      | sibilans      | Pair          | Palearctic | Migration   | 5         | (158)      |
| Muscicapidae | Saxicolini      | Luscinia      | luscinia      | Pair          | Palearctic | Migration   | 5         | (103)      |
| Muscicapidae | Saxicolini      | Luscinia      | megarhynchos  | Pair          | Palearctic | Migration   | 5         | (103)      |
| Muscicapidae | Saxicolini      | Luscinia      | calliope      | Pair          | Palearctic | Migration   | 5         | (103)      |
| Muscicapidae | Saxicolini      | Luscinia      | pectoralis    | Pair          | Palearctic | Altitudinal | 4         | (8)        |
| Muscicapidae | Saxicolini      | Luscinia      | svecica       | Pair          | Palearctic | Migration   | 6         | (103)      |
| Muscicapidae | Saxicolini      | Luscinia      | ruficeps      | Unknown       | Palearctic | Migration   | 4         | (92)       |
| Muscicapidae | Saxicolini      | Luscinia      | obscura       | Unknown       | Palearctic | Migration   |           | (92)       |
| Muscicapidae | Saxicolini      | Luscinia      | pectardens    | Unknown       | Palearctic | Migration   |           | (8)        |
| Muscicapidae | Saxicolini      | Luscinia      | brunnea       | Pair          | Palearctic | Migration   | 4         | (8)        |
| Muscicapidae | Saxicolini      | Luscinia      | cyane         | Pair          | Palearctic | Migration   | 5         | (477)      |
| Muscicapidae | Saxicolini      | Tarsiger      | cyaneus       | Pair          | Palearctic | Altitudinal | 6         | (103)      |
| Muscicapidae | Saxicolini      | Tarsiger      | chrysaesus    | Unknown       | Palearctic | Altitudinal | 4         | (8)        |
| Muscicapidae | Saxicolini      | Tarsiger      | indicus       | Pair          | Palearctic | Altitudinal | 3         | (8)        |
| Muscicapidae | Saxicolini      | Tarsiger      | hyperythrus   | Unknown       | Palearctic | Altitudinal |           | (8)        |
| Muscicapidae | Saxicolini      | Tarsiger      | johnstoniae   | Unknown       | Palearctic | Resident    |           | (320)      |
| Muscicapidae | Saxicolini      | Irania        | gutturalis    | Pair          | Palearctic | Migration   | 4         | (103)      |
| Muscicapidae | Saxicolini      | Cossypha      | isabellae     | Unknown       | Africa     | Resident    | 2         | (269)      |
| Muscicapidae | Saxicolini      | Cossypha      | roberti       | Unknown       | Africa     | Resident    |           | (269)      |
| Muscicapidae | Saxicolini      | Cossypha      | archeri       | Unknown       | Africa     | Resident    | 2         | (269)      |
| Muscicapidae | Saxicolini      | Cossypha      | anomala       | Pair          | Africa     | Resident    | 2         | (269)      |
| Muscicapidae | Saxicolini      | Cossypha      | caffra        | Pair          | Africa     | Partial     | 2         | (269)      |
| Muscicapidae | Saxicolini      | Cossypha      | humeralis     | Pair          | Africa     | Resident    | 3         | (269)      |
| Muscicapidae | Saxicolini      | Cossypha      | cyanocampter  | Pair          | Africa     | Resident    | 2         | (269)      |
| Muscicapidae | Saxicolini      | Cossypha      | polioptera    | Unknown       | Africa     | Resident    |           | (269)      |
| Muscicapidae | Saxicolini      | Cossypha      | semirufa      | Pair          | Africa     | Resident    | 2         | (269)      |
| Muscicapidae | Saxicolini      | Cossypha      | heuglini      | Pair          | Africa     | Resident    | 2         | (269)      |
| Muscicapidae | Saxicolini      | Cossypha      | natalensis    | Pair          | Africa     | Partial     | 3         | (269)      |
| Muscicapidae | Saxicolini      | Cossypha      | dichroa       | Pair          | Africa     | Partial     | 3         | (269)      |
| Muscicapidae | Saxicolini      | Cossypha      | heinrichi     | Unknown       | Africa     | Resident    |           | (269)      |
| Muscicapidae | Saxicolini      | Cossypha      | niveicapilla  | Pair          | Africa     | Resident    | 2         | (269)      |
| Muscicapidae | Saxicolini      | Cossypha      | albicapilla   | Unknown       | Africa     | Resident    | 2         | (269)      |
| Muscicapidae | Saxicolini      | Xenocopsychus | ansorgei      | Pair          | Africa     | Resident    | 2         | (269)      |
| Muscicapidae | Saxicolini      | Cichladusa    | arquata       | Pair          | Africa     | Resident    | 2         | (269)      |
| Muscicapidae | Saxicolini      | Cichladusa    | ruficauda     | Pair          | Africa     | Resident    | 2         | (269)      |
| Muscicapidae | Saxicolini      | Cichladusa    | guttata       | Pair          | Africa     | Resident    | 2         | (269)      |
| Muscicapidae | Saxicolini      | Cercotrichas  | leucosticta   | Unknown       | Africa     | Resident    |           | (269)      |
| Muscicapidae | Saxicolini      | Cercotrichas  | quadrivirgata | Pair          | Africa     | Resident    | 2         | (269)      |
| Muscicapidae | Saxicolini      | Cercotrichas  | barbata       | Pair          | Africa     | Resident    | 2         | (269)      |
| Muscicapidae | Saxicolini      | Cercotrichas  | signata       | Pair          | Africa     | Resident    | 2         | (269)      |
| Muscicapidae | Saxicolini      | Cercotrichas  | hartlaubi     | Pair          | Africa     | Resident    | 3         | (269)      |
| Muscicapidae | Saxicolini      | Cercotrichas  | leucophrys    | Pair          | Africa     | Resident    | 3         | (269)      |
| Muscicapidae | Saxicolini      | Cercotrichas  | galactotes    | Pair          | Africa     | Partial     | 4         | (103)      |
| Muscicapidae | Saxicolini      | Cercotrichas  | paena         | Pair          | Africa     | Resident    | 3         | (269)      |

| Family       | Clade Reference | Genus         | species          | Parental care | Region     | Movement    | Island  | Clutch      |
|--------------|-----------------|---------------|------------------|---------------|------------|-------------|---------|-------------|
| Muscicapidae | Saxicolini      | Cercotrichas  | coryphaeus       | Pair          | Africa     | Resident    |         | 3 (269)     |
| Muscicapidae | Saxicolini      | Cercotrichas  | podobe           | Pair          | Africa     | Resident    |         | 3 (269)     |
| Muscicapidae | Saxicolini      | Namibornis    | herero           | Pair          | Africa     | Resident    |         | 2 (269)     |
| Muscicapidae | Saxicolini      | Copsychus     | sechellarum      | Cooperation   | Africa     | Resident    | Endemic | 1 (452)     |
| Muscicapidae | Saxicolini      | Copsychus     | albospecularis   | Pair          | Africa     | Resident    |         | 3 (284)     |
| Muscicapidae | Saxicolini      | Copsychus     | saularis         | Pair          | se Asia    | Resident    |         | 4 (8, 45)   |
| Muscicapidae | Saxicolini      | Copsychus     | malabaricus      | Cooperation   | se Asia    | Resident    |         | 4 (2, 419)  |
| Muscicapidae | Saxicolini      | Copsychus     | stricklandii     | Unknown       | se Asia    | Resident    |         | (459)       |
| Muscicapidae | Saxicolini      | Copsychus     | luzoniensis      | Unknown       | se Asia    | Resident    |         | 2 (271)     |
| Muscicapidae | Saxicolini      | Copsychus     | niger            | Unknown       | se Asia    | Resident    |         | (271)       |
| Muscicapidae | Saxicolini      | Copsychus     | cebuensis        | Unknown       | se Asia    | Resident    |         | 2 (92)      |
| Muscicapidae | Saxicolini      | Trichixos     | pyrropyga        | Unknown       | se Asia    | Resident    |         | (459)       |
| Muscicapidae | Saxicolini      | Saxicoloides  | fulicata         | Pair          | se Asia    | Resident    |         | 4 (9)       |
| Muscicapidae | Saxicolini      | Phoenicurus   | alaschanicus     | Unknown       | Palearctic | Migration   |         | (320)       |
| Muscicapidae | Saxicolini      | Phoenicurus   | erythronota      | Pair          | Palearctic | Partial     |         | 4 (158)     |
| Muscicapidae | Saxicolini      | Phoenicurus   | caeruleocephalus | Pair          | Palearctic | Altitudinal |         | 4 (158)     |
| Muscicapidae | Saxicolini      | Phoenicurus   | ochruros         | Occasional    | Palearctic | Partial     |         | 5 (15, 103) |
| Muscicapidae | Saxicolini      | Phoenicurus   | phoenicurus      | Pair          | Palearctic | Migration   |         | 6 (103)     |
| Muscicapidae | Saxicolini      | Phoenicurus   | hodgsoni         | Unknown       | Palearctic | Migration   |         | 5 (8)       |
| Muscicapidae | Saxicolini      | Phoenicurus   | schisticeps      | Pair          | Palearctic | Altitudinal |         | 3 (8)       |
| Muscicapidae | Saxicolini      | Phoenicurus   | aureus           | Pair          | Palearctic | Migration   |         | 3 (8)       |
| Muscicapidae | Saxicolini      | Phoenicurus   | moussieri        | Pair          | Palearctic | Partial     |         | 4 (103)     |
| Muscicapidae | Saxicolini      | Phoenicurus   | erythrogaster    | Pair          | Palearctic | Altitudinal |         | 4 (103)     |
| Muscicapidae | Saxicolini      | Phoenicurus   | frontalis        | Pair          | Palearctic | Altitudinal |         | 3 (8)       |
| Muscicapidae | Saxicolini      | Chaimarrornis | leucocephalus    | Pair          | Palearctic | Altitudinal |         | 4 (8)       |
| Muscicapidae | Saxicolini      | Rhyacornis    | fuliginosus      | Pair          | Palearctic | Altitudinal |         | 4 (8)       |
| Muscicapidae | Saxicolini      | Rhyacornis    | bicolor          | Unknown       | se Asia    | Resident    |         | 3 (92)      |
| Muscicapidae | Saxicolini      | Hodgsonius    | phaenicuroides   | Pair          | se Asia    | Altitudinal |         | 3 (8)       |
| Muscicapidae | Saxicolini      | Cinclidium    | leucurum         | Pair          | se Asia    | Altitudinal |         | 3 (9)       |
| Muscicapidae | Saxicolini      | Cinclidium    | diana            | Unknown       | se Asia    | Resident    |         | no source   |
| Muscicapidae | Saxicolini      | Cinclidium    | frontale         | Unknown       | se Asia    | Resident    |         | (9)         |
| Muscicapidae | Saxicolini      | Grandala      | coelicolor       | Pair          | Palearctic | Altitudinal |         | 2 (9)       |
| Muscicapidae | Saxicolini      | Enicurus      | scouleri         | Pair          | Palearctic | Altitudinal |         | 3 (158)     |
| Muscicapidae | Saxicolini      | Enicurus      | velatus          | Unknown       | se Asia    | Resident    |         | no source   |
| Muscicapidae | Saxicolini      | Enicurus      | ruficapillus     | Unknown       | se Asia    | Resident    |         | 2 (459)     |
| Muscicapidae | Saxicolini      | Enicurus      | immaculatus      | Pair          | se Asia    | Resident    |         | 3 (9)       |
| Muscicapidae | Saxicolini      | Enicurus      | schistaceus      | Pair          | se Asia    | Resident    |         | 3 (9)       |
| Muscicapidae | Saxicolini      | Enicurus      | leschenaulti     | Pair          | se Asia    | Resident    |         | 4 (9)       |
| Muscicapidae | Saxicolini      | Enicurus      | maculatus        | Pair          | se Asia    | Resident    |         | 3 (9)       |
| Muscicapidae | Saxicolini      | Cochoa        | purpurea         | Pair          | se Asia    | Resident    |         | 3 (9)       |
| Muscicapidae | Saxicolini      | Cochoa        | viridis          | Pair          | se Asia    | Resident    |         | 3 (9)       |
| Muscicapidae | Saxicolini      | Cochoa        | beccarii         | Unknown       | se Asia    | Resident    |         | (92)        |
| Muscicapidae | Saxicolini      | Cochoa        | azurea           | Unknown       | se Asia    | Resident    |         | 2 (92)      |
| Muscicapidae | Saxicolini      | Saxicola      | rubetra          | Occasional    | Palearctic | Migration   |         | 6 (103)     |
| Muscicapidae | Saxicolini      | Saxicola      | macrorhyncha     | Unknown       | se Asia    | Migration   |         | (497)       |
| Muscicapidae | Saxicolini      | Saxicola      | insignis         | Pair          | Palearctic | Migration   |         | 4 (497)     |
| Muscicapidae | Saxicolini      | Saxicola      | dacotiae         | Cooperation   | Palearctic | Resident    | Endemic | 3 (103)     |
| Muscicapidae | Saxicolini      | Saxicola      | torquata         | Pair          | Palearctic | Partial     |         | 5 (103)     |
| Muscicapidae | Saxicolini      | Saxicola      | tectes           | Pair          | Africa     | Resident    | Endemic | 2 (497)     |
| Muscicapidae | Saxicolini      | Saxicola      | leucura          | Pair          | se Asia    | Resident    |         | 4 (497)     |
| Muscicapidae | Saxicolini      | Saxicola      | caprata          | Pair          | se Asia    | Partial     |         | 4 (497)     |
| Muscicapidae | Saxicolini      | Saxicola      | jerdoni          | Unknown       | se Asia    | Resident    |         | 4 (497)     |
| Muscicapidae | Saxicolini      | Saxicola      | ferrea           | Pair          | se Asia    | Partial     |         | 4 (497)     |
| Muscicapidae | Saxicolini      | Saxicola      | gutturalis       | Pair          | se Asia    | Resident    | Endemic | 2 (497)     |
| Muscicapidae | Saxicolini      | Saxicola      | bifasciata       | Cooperation   | Africa     | Resident    |         | 3 (497)     |
| Muscicapidae | Saxicolini      | Oenanthe      | leucopyga        | Occasional    | Palearctic | Resident    |         | 4 (103)     |
| Muscicapidae | Saxicolini      | Oenanthe      | monacha          | Pair          | Palearctic | Resident    |         | (103)       |
| Muscicapidae | Saxicolini      | Oenanthe      | alboniger        | Pair          | Palearctic | Resident    |         | 4 (103)     |
| Muscicapidae | Saxicolini      | Oenanthe      | leucura          | Pair          | Palearctic | Resident    |         | 4 (103)     |
| Muscicapidae | Saxicolini      | Oenanthe      | monticola        | Pair          | Africa     | Resident    |         | 3 (269)     |
| Muscicapidae | Saxicolini      | Oenanthe      | phillipsi        | Pair          | Africa     | Resident    |         | 3 (269)     |
| Muscicapidae | Saxicolini      | Oenanthe      | oenanthe         | Occasional    | Palearctic | Migration   |         | 6 (103)     |
| Muscicapidae | Saxicolini      | Oenanthe      | lugens           | Pair          | Palearctic | Partial     |         | 4 (103)     |
| Muscicapidae | Saxicolini      | Oenanthe      | lugentoides      | Unknown       | Palearctic | Partial     |         | (103)       |
| Muscicapidae | Saxicolini      | Oenanthe      | lugubris         | Cooperation   | Africa     | Resident    |         | (269)       |
| Muscicapidae | Saxicolini      | Oenanthe      | finschii         | Pair          | Palearctic | Partial     |         | 5 (103)     |
| Muscicapidae | Saxicolini      | Oenanthe      | picata           | Pair          | se Asia    | Partial     |         | 5 (9)       |
| Muscicapidae | Saxicolini      | Oenanthe      | moesta           | Pair          | Palearctic | Partial     |         | 4 (103)     |
| Muscicapidae | Saxicolini      | Oenanthe      | hispanica        | Pair          | Palearctic | Migration   |         | 5 (103)     |
| Muscicapidae | Saxicolini      | Oenanthe      | pleschanka       | Pair          | Palearctic | Migration   |         | 5 (103)     |
| Muscicapidae | Saxicolini      | Oenanthe      | cyprica          | Unknown       | Palearctic | Migration   |         | (103)       |
| Muscicapidae | Saxicolini      | Oenanthe      | xanthopyrna      | Pair          | Palearctic | Migration   |         | 5 (103)     |
| Muscicapidae | Saxicolini      | Oenanthe      | deserti          | Pair          | Palearctic | Partial     |         | 4 (103)     |

| Family       | Clade Reference | Genus         | species           | Parental care | Region      | Movement  | Island  | Clutch       |
|--------------|-----------------|---------------|-------------------|---------------|-------------|-----------|---------|--------------|
| Muscicapidae | Saxicolini      | Oenanthe      | pileata           | Pair          | Africa      | Partial   |         | 4 (269)      |
| Muscicapidae | Saxicolini      | Oenanthe      | isabellina        | Pair          | Palaearctic | Migration |         | 6 (103)      |
| Muscicapidae | Saxicolini      | Oenanthe      | bottae            | Pair          | Africa      | Partial   |         | 3 (269)      |
| Muscicapidae | Saxicolini      | Oenanthe      | heuglini          | Unknown       | Africa      | Partial   |         | (269)        |
| Muscicapidae | Saxicolini      | Cercomela     | sinuata           | Pair          | Africa      | Resident  |         | 3 (269)      |
| Muscicapidae | Saxicolini      | Cercomela     | schlegelii        | Pair          | Africa      | Resident  |         | 3 (269)      |
| Muscicapidae | Saxicolini      | Cercomela     | tractrac          | Pair          | Africa      | Resident  |         | 2 (269)      |
| Muscicapidae | Saxicolini      | Cercomela     | familiaris        | Pair          | Africa      | Resident  |         | 3 (269)      |
| Muscicapidae | Saxicolini      | Cercomela     | scotocerca        | Unknown       | Africa      | Resident  |         | (269)        |
| Muscicapidae | Saxicolini      | Cercomela     | fusca             | Pair          | se Asia     | Resident  |         | 3 (9)        |
| Muscicapidae | Saxicolini      | Cercomela     | dubia             | Unknown       | Africa      | Resident  |         | (269)        |
| Muscicapidae | Saxicolini      | Cercomela     | melanura          | Pair          | Africa      | Resident  |         | 3 (269)      |
| Muscicapidae | Saxicolini      | Cercomela     | sordida           | Pair          | Africa      | Resident  |         | 2 (269)      |
| Muscicapidae | Saxicolini      | Myrmecocichla | tholloni          | Unknown       | Africa      | Resident  |         | 2 (269)      |
| Muscicapidae | Saxicolini      | Myrmecocichla | aethiops          | Cooperation   | Africa      | Resident  |         | 3 (134, 269) |
| Muscicapidae | Saxicolini      | Myrmecocichla | formicivora       | Pair          | Africa      | Resident  |         | 3 (269)      |
| Muscicapidae | Saxicolini      | Myrmecocichla | nigra             | Unknown       | Africa      | Resident  |         | 3 (269)      |
| Muscicapidae | Saxicolini      | Myrmecocichla | melaena           | Unknown       | Africa      | Resident  |         | (269)        |
| Muscicapidae | Saxicolini      | Myrmecocichla | albifrons         | Unknown       | Africa      | Resident  |         | 2 (269)      |
| Muscicapidae | Saxicolini      | Myrmecocichla | arnotti           | Unknown       | Africa      | Resident  |         | 3 (269)      |
| Muscicapidae | Saxicolini      | Thamnolaea    | cinnamomeiventris | Pair          | Africa      | Resident  |         | 3 (269)      |
| Muscicapidae | Saxicolini      | Thamnolaea    | coronata          | Unknown       | Africa      | Resident  |         | (269)        |
| Muscicapidae | Saxicolini      | Thamnolaea    | semirufa          | Unknown       | Africa      | Resident  |         | 3 (269)      |
| Muscicapidae | Saxicolini      | Pinarornis    | plumosus          | Unknown       | Africa      | Resident  |         | 3 (269)      |
| Sturnidae    | Sturnini        | Aplonis       | zelandica         | Unknown       | Australia   | Resident  | Endemic | (149)        |
| Sturnidae    | Sturnini        | Aplonis       | santovestris      | Unknown       | Australia   | Resident  | Endemic | 2 (149)      |
| Sturnidae    | Sturnini        | Aplonis       | pelzelni          | Unknown       | Australia   | Resident  | Endemic | 2 (149)      |
| Sturnidae    | Sturnini        | Aplonis       | atrifusca         | Unknown       | Australia   | Resident  | Endemic | (149)        |
| Sturnidae    | Sturnini        | Aplonis       | corvina           | Unknown       | Australia   | Resident  | Endemic | (149)        |
| Sturnidae    | Sturnini        | Aplonis       | mavornata         | Unknown       | Australia   | Resident  | Endemic | (149)        |
| Sturnidae    | Sturnini        | Aplonis       | cinerascens       | Unknown       | Australia   | Resident  | Endemic | (149)        |
| Sturnidae    | Sturnini        | Aplonis       | tabuensis         | Unknown       | Australia   | Resident  | Endemic | 2 (149)      |
| Sturnidae    | Sturnini        | Aplonis       | striata           | Unknown       | Australia   | Resident  | Endemic | (149)        |
| Sturnidae    | Sturnini        | Aplonis       | fusca             | Unknown       | Australia   | Resident  | Endemic | (149)        |
| Sturnidae    | Sturnini        | Aplonis       | opaca             | Pair          | Australia   | Resident  | Endemic | 2 (149)      |
| Sturnidae    | Sturnini        | Aplonis       | crassa            | Unknown       | Australia   | Resident  | Endemic | (149)        |
| Sturnidae    | Sturnini        | Aplonis       | cantoroides       | Unknown       | Australia   | Nomadic   |         | 2 (149)      |
| Sturnidae    | Sturnini        | Aplonis       | feadensis         | Unknown       | Australia   | Resident  | Endemic | (149)        |
| Sturnidae    | Sturnini        | Aplonis       | insularis         | Unknown       | Australia   | Resident  | Endemic | 3 (149)      |
| Sturnidae    | Sturnini        | Aplonis       | grandis           | Unknown       | Australia   | Resident  | Endemic | (149)        |
| Sturnidae    | Sturnini        | Aplonis       | dichroa           | Unknown       | Australia   | Resident  | Endemic | (149)        |
| Sturnidae    | Sturnini        | Aplonis       | mysolensis        | Unknown       | Australia   | Resident  | Endemic | (149)        |
| Sturnidae    | Sturnini        | Aplonis       | minor             | Pair          | se Asia     | Resident  |         | (149)        |
| Sturnidae    | Sturnini        | Aplonis       | panayensis        | Unknown       | se Asia     | Nomadic   |         | 3 (149)      |
| Sturnidae    | Sturnini        | Aplonis       | metallica         | Pair          | Australia   | Partial   |         | 2 (149)      |
| Sturnidae    | Sturnini        | Aplonis       | magna             | Unknown       | Australia   | Resident  |         | (149)        |
| Sturnidae    | Sturnini        | Aplonis       | mystacea          | Unknown       | Australia   | Resident  |         | (149)        |
| Sturnidae    | Sturnini        | Aplonis       | brunneicapilla    | Unknown       | Australia   | Resident  | Endemic | (149)        |
| Sturnidae    | Sturnini        | Poeyoptera    | stuhlmanni        | Unknown       | Africa      | Resident  |         | (149, 174)   |
| Sturnidae    | Sturnini        | Poeyoptera    | kenricki          | Unknown       | Africa      | Resident  |         | (149, 174)   |
| Sturnidae    | Sturnini        | Poeyoptera    | lugubris          | Unknown       | Africa      | Resident  |         | 3 (149, 174) |
| Sturnidae    | Sturnini        | Grafisia      | torquata          | Unknown       | Africa      | Resident  |         | 3 (149, 174) |
| Sturnidae    | Sturnini        | Onychognathus | walleri           | Pair          | Africa      | Resident  |         | (149, 174)   |
| Sturnidae    | Sturnini        | Onychognathus | nabouroup         | Pair          | Africa      | Resident  |         | 3 (149, 174) |
| Sturnidae    | Sturnini        | Onychognathus | tristramii        | Pair          | Africa      | Resident  |         | 3 (149, 174) |
| Sturnidae    | Sturnini        | Onychognathus | morio             | Pair          | Africa      | Resident  |         | 3 (149, 174) |
| Sturnidae    | Sturnini        | Onychognathus | blythii           | Unknown       | Africa      | Resident  |         | 4 (149, 174) |
| Sturnidae    | Sturnini        | Onychognathus | frater            | Unknown       | Africa      | Resident  | Endemic | (149, 174)   |
| Sturnidae    | Sturnini        | Onychognathus | fulgidus          | Unknown       | Africa      | Resident  |         | (149, 174)   |
| Sturnidae    | Sturnini        | Onychognathus | tenuirostris      | Pair          | Africa      | Resident  |         | 3 (149, 174) |
| Sturnidae    | Sturnini        | Onychognathus | albirostris       | Pair          | Africa      | Resident  |         | 4 (149, 174) |
| Sturnidae    | Sturnini        | Onychognathus | salvadorii        | Unknown       | Africa      | Resident  |         | (149, 174)   |
| Sturnidae    | Sturnini        | Coccycolius   | iris              | Cooperation   | Africa      | Resident  |         | (149, 174)   |
| Sturnidae    | Sturnini        | Lamprotornis  | cupreocauda       | Unknown       | Africa      | Resident  |         | 3 (149, 174) |
| Sturnidae    | Sturnini        | Lamprotornis  | purpureiceps      | Unknown       | Africa      | Resident  |         | 3 (149, 174) |
| Sturnidae    | Sturnini        | Lamprotornis  | corruscus         | Pair          | Africa      | Resident  |         | 3 (149, 174) |
| Sturnidae    | Sturnini        | Lamprotornis  | purpureus         | Unknown       | Africa      | Resident  |         | 3 (149, 174) |
| Sturnidae    | Sturnini        | Lamprotornis  | nitens            | Cooperation   | Africa      | Resident  |         | 3 (149, 174) |
| Sturnidae    | Sturnini        | Lamprotornis  | chalcurus         | Unknown       | Africa      | Resident  |         | (149, 174)   |
| Sturnidae    | Sturnini        | Lamprotornis  | chalybaeus        | Pair          | Africa      | Nomadic   |         | 4 (149, 174) |
| Sturnidae    | Sturnini        | Lamprotornis  | chloropterus      | Cooperation   | Africa      | Resident  |         | 3 (149, 174) |
| Sturnidae    | Sturnini        | Lamprotornis  | elisabeth         | Unknown       | Africa      | Resident  |         | (149, 174)   |
| Sturnidae    | Sturnini        | Lamprotornis  | acuticaudus       | Unknown       | Africa      | Resident  |         | 3 (149, 174) |

| Family    | Clade Reference | Genus          | species           | Parental care | Region     | Movement  | Island  | Clutch       |
|-----------|-----------------|----------------|-------------------|---------------|------------|-----------|---------|--------------|
| Sturnidae | Sturnini        | Lamprotornis   | splendidus        | Pair          | Africa     | Migration |         | 2 (149, 174) |
| Sturnidae | Sturnini        | Lamprotornis   | ornatus           | Unknown       | Africa     | Resident  | Endemic | (149, 174)   |
| Sturnidae | Sturnini        | Lamprotornis   | australis         | Pair          | Africa     | Resident  |         | (149, 174)   |
| Sturnidae | Sturnini        | Lamprotornis   | mevesii           | Cooperation   | Africa     | Resident  |         | 3 (149, 174) |
| Sturnidae | Sturnini        | Lamprotornis   | caudatus          | Cooperation   | Africa     | Resident  |         | (149, 174)   |
| Sturnidae | Sturnini        | Lamprotornis   | purpureopterus    | Cooperation   | Africa     | Nomadic   |         | (149, 174)   |
| Sturnidae | Sturnini        | Lamprotornis   | superbus          | Cooperation   | Africa     | Resident  |         | 4 (149, 174) |
| Sturnidae | Sturnini        | Lamprotornis   | pulcher           | Cooperation   | Africa     | Resident  |         | 4 (149, 174) |
| Sturnidae | Sturnini        | Lamprotornis   | shellei           | Pair          | Africa     | Migration |         | 4 (149, 174) |
| Sturnidae | Sturnini        | Lamprotornis   | hildebrandti      | Unknown       | Africa     | Resident  |         | 3 (149, 174) |
| Sturnidae | Sturnini        | Cinnyricinclus | sharpii           | Unknown       | Africa     | Resident  |         | 3 (149, 174) |
| Sturnidae | Sturnini        | Cinnyricinclus | femorialis        | Unknown       | Africa     | Resident  |         | (149, 174)   |
| Sturnidae | Sturnini        | Cinnyricinclus | leucogaster       | Occasional    | Africa     | Migration |         | 3 (149, 174) |
| Sturnidae | Sturnini        | Speculipastor  | bicolor           | Suspected     | Africa     | Resident  |         | (149, 174)   |
| Sturnidae | Sturnini        | Neocichla      | gutturalis        | Cooperation   | Africa     | Resident  |         | (149, 174)   |
| Sturnidae | Sturnini        | Spreo          | fischeri          | Cooperation   | Africa     | Resident  |         | 5 (149, 174) |
| Sturnidae | Sturnini        | Spreo          | bicolor           | Cooperation   | Africa     | Resident  |         | 3 (149, 174) |
| Sturnidae | Sturnini        | Spreo          | albicapillus      | Unknown       | Africa     | Resident  |         | 5 (149, 174) |
| Sturnidae | Sturnini        | Cosmopsarus    | regius            | Cooperation   | Africa     | Resident  |         | 4 (149, 174) |
| Sturnidae | Sturnini        | Cosmopsarus    | unicolor          | Cooperation   | Africa     | Resident  |         | 3 (149, 174) |
| Sturnidae | Sturnini        | Saroglossa     | aurata            | Unknown       | Africa     | Resident  |         | (149, 174)   |
| Sturnidae | Sturnini        | Saroglossa     | spiloptera        | Unknown       | se Asia    | Migration |         | 3 (149)      |
| Sturnidae | Sturnini        | Creatophora    | cinerea           | Pair          | Africa     | Nomadic   |         | 3 (149, 174) |
| Sturnidae | Sturnini        | Necropsar      | rodericanus       | Unknown       | Africa     | Resident  | Endemic | no source    |
| Sturnidae | Sturnini        | Fregilupus     | varius            | Unknown       | Africa     | Resident  | Endemic | no source    |
| Sturnidae | Sturnini        | Sturnus        | senex             | Unknown       | se Asia    | Resident  |         | (149)        |
| Sturnidae | Sturnini        | Sturnus        | malabaricus       | Pair          | se Asia    | Partial   |         | 4 (149)      |
| Sturnidae | Sturnini        | Sturnus        | erythropygius     | Unknown       | se Asia    | Resident  | Endemic | 4 (149)      |
| Sturnidae | Sturnini        | Sturnus        | pagodarum         | Pair          | se Asia    | Partial   |         | 4 (149)      |
| Sturnidae | Sturnini        | Sturnus        | sericeus          | Unknown       | Palearctic | Resident  |         | (149)        |
| Sturnidae | Sturnini        | Sturnus        | sturninus         | Pair          | Palearctic | Migration |         | 5 (149)      |
| Sturnidae | Sturnini        | Sturnus        | philippensis      | Pair          | Palearctic | Migration |         | 5 (149)      |
| Sturnidae | Sturnini        | Sturnus        | sinensis          | Unknown       | Palearctic | Migration |         | 4 (149)      |
| Sturnidae | Sturnini        | Sturnus        | roseus            | Unknown       | Palearctic | Migration |         | 4 (149)      |
| Sturnidae | Sturnini        | Sturnus        | vulgaris          | Occasional    | Palearctic | Partial   |         | (393)        |
| Sturnidae | Sturnini        | Sturnus        | unicolor          | Pair          | Palearctic | Resident  |         | 4 (149)      |
| Sturnidae | Sturnini        | Sturnus        | cineraceus        | Pair          | Palearctic | Migration |         | 5 (149)      |
| Sturnidae | Sturnini        | Sturnus        | contra            | Pair          | se Asia    | Resident  |         | 4 (149)      |
| Sturnidae | Sturnini        | Sturnus        | nigricollis       | Unknown       | se Asia    | Resident  |         | 4 (149)      |
| Sturnidae | Sturnini        | Sturnus        | burmannicus       | Unknown       | se Asia    | Resident  |         | (149)        |
| Sturnidae | Sturnini        | Sturnus        | melanopterus      | Pair          | se Asia    | Resident  |         | 3 (92)       |
| Sturnidae | Sturnini        | Leucopsar      | rothschildi       | Pair          | se Asia    | Resident  | Endemic | 2 (92)       |
| Sturnidae | Sturnini        | Acridotheres   | tristis           | Pair          | Widespread | Resident  |         | 4 (149)      |
| Sturnidae | Sturnini        | Acridotheres   | ginginianus       | Pair          | se Asia    | Resident  |         | 4 (149)      |
| Sturnidae | Sturnini        | Acridotheres   | fuscus            | Pair          | se Asia    | Resident  |         | 4 (149)      |
| Sturnidae | Sturnini        | Acridotheres   | grandis           | Pair          | se Asia    | Resident  |         | 3 (149)      |
| Sturnidae | Sturnini        | Acridotheres   | cinereus          | Unknown       | se Asia    | Resident  |         | (149)        |
| Sturnidae | Sturnini        | Acridotheres   | albocinctus       | Unknown       | se Asia    | Nomadic   |         | (149)        |
| Sturnidae | Sturnini        | Acridotheres   | crystallocephalus | Pair          | Palearctic | Resident  |         | 4 (149)      |
| Sturnidae | Sturnini        | Ampeliceps     | coronatus         | Unknown       | se Asia    | Resident  |         | (149)        |
| Sturnidae | Sturnini        | Mino           | anais             | Unknown       | Australia  | Resident  |         | (149)        |
| Sturnidae | Sturnini        | Mino           | dumontii          | Cooperation   | Australia  | Resident  |         | 1 (128, 149) |
| Sturnidae | Sturnini        | Basilornis     | celebensis        | Unknown       | se Asia    | Resident  |         | (149)        |
| Sturnidae | Sturnini        | Basilornis     | galeatus          | Unknown       | se Asia    | Resident  | Endemic | (149)        |
| Sturnidae | Sturnini        | Basilornis     | corythaix         | Unknown       | se Asia    | Resident  | Endemic | (149)        |
| Sturnidae | Sturnini        | Basilornis     | miranda           | Unknown       | se Asia    | Resident  |         | (149)        |
| Sturnidae | Sturnini        | Streptocitta   | albicollis        | Unknown       | se Asia    | Resident  |         | (149)        |
| Sturnidae | Sturnini        | Streptocitta   | albertinae        | Unknown       | se Asia    | Resident  | Endemic | (149)        |
| Sturnidae | Sturnini        | Sarcops        | calvus            | Unknown       | se Asia    | Resident  |         | (149)        |
| Sturnidae | Sturnini        | Gracula        | ptilogenys        | Pair          | se Asia    | Resident  |         | 2 (149)      |
| Sturnidae | Sturnini        | Gracula        | religiosa         | Pair          | se Asia    | Resident  |         | 2 (149)      |
| Sturnidae | Sturnini        | Enodes         | erythrophris      | Unknown       | se Asia    | Resident  |         | (149)        |
| Sturnidae | Sturnini        | Scissirostrum  | dubium            | Unknown       | se Asia    | Resident  |         | 2 (149)      |
| Sturnidae | Sturnini        | Buphagus       | africanus         | Cooperation   | Africa     | Resident  |         | (149, 174)   |
| Sturnidae | Sturnini        | Buphagus       | erythrorhynchus   | Cooperation   | Africa     | Resident  |         | (149, 174)   |
| Sturnidae | Mimini          | Dumetella      | carolinensis      | Pair          | Nearctic   | Migration |         | 3 (80)       |
| Sturnidae | Mimini          | Melanoptila    | glabrioris        | Unknown       | America    | Resident  |         | (54)         |
| Sturnidae | Mimini          | Melanotis      | caerulescens      | Unknown       | America    | Resident  |         | 2 (54)       |
| Sturnidae | Mimini          | Melanotis      | hypoleucus        | Pair          | America    | Resident  |         | 2 (54)       |
| Sturnidae | Mimini          | Mimus          | polyglottos       | Pair          | Nearctic   | Nomadic   |         | 4 (118)      |
| Sturnidae | Mimini          | Mimus          | gilvus            | Pair          | America    | Resident  |         | 2 (381)      |
| Sturnidae | Mimini          | Mimus          | gundlachi         | Unknown       | America    | Resident  | Endemic | 2 (54)       |
| Sturnidae | Mimini          | Mimus          | saturninus        | Suspected     | America    | Resident  |         | 3 (54)       |



| Family    | Clade Reference | Genus         | species       | Parental care | Region   | Movement  | Island    | Clutch |
|-----------|-----------------|---------------|---------------|---------------|----------|-----------|-----------|--------|
| Sturnidae | Mimini          | Mimus         | patagonicus   | Unknown       | America  | Migration |           | (54)   |
| Sturnidae | Mimini          | Mimus         | dorsalis      | Unknown       | America  | Resident  |           | (54)   |
| Sturnidae | Mimini          | Mimus         | triviratus    | Unknown       | America  | Migration | 4         | (54)   |
| Sturnidae | Mimini          | Mimus         | longicaudatus | Unknown       | America  | Resident  |           | (54)   |
| Sturnidae | Mimini          | Mimus         | thenca        | Unknown       | America  | Resident  | 3         | (54)   |
| Sturnidae | Mimini          | Nesomimus     | parvulus      | Cooperation   | America  | Resident  | Endemic 4 | (110)  |
| Sturnidae | Mimini          | Nesomimus     | trifasciatus  | Cooperation   | America  | Resident  | Endemic   | (110)  |
| Sturnidae | Mimini          | Nesomimus     | macdonaldi    | Cooperation   | America  | Resident  | Endemic   | (110)  |
| Sturnidae | Mimini          | Nesomimus     | melanotis     | Cooperation   | America  | Resident  | Endemic 4 | (110)  |
| Sturnidae | Mimini          | Mimodes       | graysoni      | Pair          | America  | Resident  | Endemic 3 | (54)   |
| Sturnidae | Mimini          | Oreoscoptes   | montanus      | Pair          | Nearctic | Migration | 4         | (412)  |
| Sturnidae | Mimini          | Toxostoma     | rufum         | Pair          | Nearctic | Partial   | 4         | (68)   |
| Sturnidae | Mimini          | Toxostoma     | longirostre   | Pair          | America  | Resident  | 4         | (491)  |
| Sturnidae | Mimini          | Toxostoma     | guttatum      | Unknown       | America  | Resident  | Endemic   | (54)   |
| Sturnidae | Mimini          | Toxostoma     | bendirei      | Pair          | Nearctic | Partial   | 3         | (143)  |
| Sturnidae | Mimini          | Toxostoma     | cinereum      | Unknown       | America  | Resident  | 3         | (54)   |
| Sturnidae | Mimini          | Toxostoma     | curvirostre   | Pair          | America  | Resident  | 4         | (490)  |
| Sturnidae | Mimini          | Toxostoma     | ocellatum     | Unknown       | America  | Resident  | 2         | (54)   |
| Sturnidae | Mimini          | Toxostoma     | lecontei      | Pair          | Nearctic | Resident  | 3         | (447)  |
| Sturnidae | Mimini          | Toxostoma     | redivivum     | Pair          | Nearctic | Resident  | 3         | (89)   |
| Sturnidae | Mimini          | Toxostoma     | crissale      | Pair          | America  | Resident  | 3         | (90)   |
| Sturnidae | Mimini          | Cinclocerthia | ruficauda     | Unknown       | America  | Resident  | Endemic 2 | (54)   |
| Sturnidae | Mimini          | Cinclocerthia | gutturalis    | Unknown       | America  | Resident  | Endemic 2 | (54)   |
| Sturnidae | Mimini          | Ramphocinclus | brachyurus    | Unknown       | America  | Resident  | Endemic 2 | (54)   |
| Sturnidae | Mimini          | Margarops     | fuscus        | Unknown       | America  | Resident  | Endemic 2 | (54)   |
| Sturnidae | Mimini          | Margarops     | fuscatus      | Unknown       | America  | Resident  | Endemic 2 | (54)   |

#### References

- Agreda A, Krabbe N & Rodriguez O. 1999 Pale-headed brush-finch *Atlapetes pallidiceps* is not extinct. *Cotinga* **11**, 50-4.
- Aguon CF & Conant S. 1994 Breeding biology of the white-rumped shama on Oahu, Hawaii. *Wilson Bull.* **106**, 311-28.
- Ahumada JA. 2001 Comparison of the reproductive biology of two Neotropical wrens in an unpredictable environment in northeastern Colombia. *Auk* **118**, 191-210.
- Al-Safadi MM. 1996 Observations on breeding Ruppell's weaver *Ploceus galbula* in the Republic of Yemen. *Sandgrouse* **18**, 14-8.
- Ali S & Ripley SD. 1971 *Handbook of the birds of India and Pakistan. Vol. 6. Cuckoo-shrikes to babaxes*. Bombay: Oxford University Press.
- Ali S & Ripley SD. 1972 *Handbook of the birds of India and Pakistan. Vol. 5. Larks to the grey hypocolius*. Bombay: Oxford University Press.
- Ali S & Ripley SD. 1972 *Handbook of the birds of India and Pakistan. Vol. 7. Laughing thrushes to the mangrove whistler*. Bombay: Oxford University Press.
- Ali S & Ripley SD. 1973 *Handbook of the birds of India and Pakistan. Vol. 8. Warblers to redstarts*. Bombay: Oxford University Press.
- Ali S & Ripley SD. 1973 *Handbook of the birds of India and Pakistan. Vol. 9. Robins to wagtails*. Bombay: Oxford University Press.
- Ali S & Ripley SD. 1974 *Handbook of the birds of India and Pakistan. Vol. 10. Flowerpeckers to buntings*. Bombay: Oxford University Press.
- Almeida JB & Macedo RH. 2001 Lek-like mating system of the monogamous blue-black grassquit. *Auk* **118**, 404-11.
- Alves MAS. 1990 Social system and helping behavior of the white-banded tanager (*Neothraupis fasciata*). *Condor* **92**, 470-4.
- Ammon EM. 1995 Lincoln's sparrow. In *Birds of North America: Life Histories for the Twenty-First Century*, (ed. A. Poole, P. Stettenheim & F. Gill), pp. 1-20. Washington, D.C.: American Ornithologist's Union and Academy of Natural Sciences, Philadelphia
- Andersson M. 1982 Female choice selects for extreme tail length in a widowbird. *Nature* **299**, 818-20.
- Andersson R. 1996 Helping behaviour in black redstart *Phoenicurus ochruros*. *Ornis Svecica* **6**, 130-2.
- Andersson S. 1991 Bowers on the savanna: display courts and mate choice in a lekking widowbird. *Behav. Ecol.* **2**, 210-8.
- Andersson S. 1992 Female preference for long tails in lekking Jackson's widowbirds: experimental evidence. *Anim. Behav.* **43**, 379-86.
- Andersson S. 1993 Sexual dimorphism and modes of sexual selection in lekking Jackson's widowbirds *Euplectes jacksoni* (Ploceinae). *Biol. J. Linn. Soc.* **49**, 1-17.
- Appert O. 1970 Zur biologie der Vangawürger (Vangidae) Südwest-Madagaskars. *Ornithol. Beob.* **67**, 101-33.
- Ash JS. 1987 *Ploceus victoriae*. *Ibis* **29**, 406-7.
- Atkins JD & Harvey WG. 1996 A new site for, and observations on *Serinus flavigula* in Ethiopia, with comments on its taxonomic status. *Bull. Brit. Ornithol. Club* **116**, 52-8.
- Atkinson P, Peet N & Alexander J. 1991 The status and conservation of the endemic species of Sao Tomé and Príncipe, West Africa. *Bird Cons. Int.* **1**, 255-82.
- Atwood JL & Bontrager DR. 2001 California gnatcatcher: *Poliophtila californica*. In *Birds of North America: Life Histories for the Twenty-First Century*, (ed. A. Poole, P. Stettenheim & F. Gill), pp. 1-31. Washington, D.C.: American Ornithologist's Union and Academy of Natural Sciences, Philadelphia

24. Badyaev AV, Gibson DD & Kessel B. 1996 White wagtail (*Motacilla alba*) and black-backed wagtail (*Motacilla lugens*). In *Birds of North America: Life Histories for the Twenty-First Century*, (ed. A. Poole, P. Stettenheim & F. Gill), pp. 1-24. Washington, D.C.: American Ornithologist's Union and Academy of Natural Sciences, Philadelphia
25. Baglione V, Marcos JM & Canestrari D. 2002 Cooperatively breeding groups of carrion crow (*Corvus corone corone*) in northern Spain. *Auk* **119**, 790-9.
26. Baicich PJ. 1997 *A guide to the nests, eggs and nestlings of North American birds. 2nd ed.* San Diego: Academic Press.
27. Baker EM & Baker NE. 1970 A new species of weaver from Tanzania. *Bull. Brit. Ornithol. Club* **110**, 51-8.
28. Baker PE & Baker H. 2000 Kakawahie and O'ahu 'alauahio. In *Birds of North America: Life Histories for the Twenty-First Century*, (ed. A. Poole, P. Stettenheim & F. Gill), pp. 1-23. Washington, D.C.: American Ornithologist's Union and Academy of Natural Sciences, Philadelphia
29. Baker PE & Baker H. 2000 Maui 'alauahio. In *Birds of North America: Life Histories for the Twenty-First Century*, (ed. A. Poole, P. Stettenheim & F. Gill), pp. 1-27. Washington, D.C.: American Ornithologist's Union and Academy of Natural Sciences, Philadelphia
30. Baldwin M. 1974 Studies of the apostle bird at Inverell. 1. General behaviour. *Sunbird* **5**, 77-88.
31. Banks J & Banks J. 1987 A note on the first discovery of the nest and eggs of the ashy-headed babbler *Garrulax cinereifrons*, an endemic species of Sri Lanka, in 1984. *J. Bomb. Nat. Hist. Soc.* **84**, 682-3.
32. Barker FK, Barrowclough GF & Groth JG. 2002 A phylogenetic hypothesis for passerine birds: taxonomic and biogeographic implications of an analysis of nuclear DNA sequence data. *Proc. R. Soc. Lond. B* **269**, 295-308.
33. Barlow JC & Bortolotti GR. 1986 Adaptive divergence in morphology and behavior in some New World island birds, with special reference to *Vireo altiloquus*. In *Acta 19 Congressus Internationalis Ornithologici. Vol. 2.*, (ed. H. Ouellet), pp. 1535-49. Ottawa
34. Barlow JC, Leckie SN & Baril CT. 1999 Gray vireo. In *Birds of North America: Life Histories for the Twenty-First Century*, (ed. A. Poole, P. Stettenheim & F. Gill), pp. 1-23. Washington, D.C.: American Ornithologist's Union and Academy of Natural Sciences, Philadelphia
35. Barlow JC & Nash SV. 1985 Behavior and nesting biology of the St. Andrew vireo. *Wilson Bulletin* **97**, 265-72.
36. Barnard P. 1990 Male tail length, sexual display intensity and female sexual response in a parasitic African finch. *Animal Behaviour* **39**, 652-6.
37. Barrantes G. 1994 First description of the nest and eggs of the sooty-faced finch. *Wilson Bulletin* **106**, 574.
38. Beason RC. 1984 Altruism in the horned lark *Eremophila alpestris*. *Journal of Field Ornithology* **55**, 489-90.
39. Beason RC. 1995 Horned lark. In *Birds of North America: Life Histories for the Twenty-First Century*, (ed. A. Poole, P. Stettenheim & F. Gill), pp. 1-24. Washington, D.C.: American Ornithologist's Union and Academy of Natural Sciences, Philadelphia
40. Beason RC & Trout LL. 1984 Cooperative breeding in the bobolink. *Wilson Bull.* **96**, 709-10.
41. Bell HL. 1982 Are the cuckoo-shrikes *Coracina boyeri*, *C. melaena* and *Campochaera sloetii* cooperative breeders. *PNG Bird Soc. Newsletter* **191-192**, 8-11.
42. Bell HL. 1983 A bird community of lowland rainforest in New Guinea. 5. Mixed-species feeding flocks. *Emu* **82**, 256-75.
43. Bennun L. 1994 The contribution of helpers to feeding nestlings in gray-capped social weavers, *Pseudonigrita araudi*. *Anim. Behav.* **47**, 1047-56.
44. Berlin KE & Vangelder EM. 1999 'Akohekohe. In *Birds of North America: Life Histories for the Twenty-First Century*, (ed. A. Poole, P. Stettenheim & F. Gill), pp. 1-16. Washington, D.C.: American Ornithologist's Union and Academy of Natural Sciences, Philadelphia
45. Bhatt D, Kumar A, Singh Y & Payne RB. 2000 Territorial songs and calls of the oriental magpie robin *Copsychus saularis*. *Current Science* **78**, 722-8.
46. BirdLife International. 2000 *Threatened birds of the world*. Barcelona & Cambridge: Lynx Edicions & Bird Life International.
47. Blakers M, Davies SJF & Reilly PN. 1984 *The atlas of Australian birds*. Melbourne: Melbourne University Press.
48. Bohórquez CI & Stiles FG. 2002 The paradoxical social system of the dusky bush-tanager (*Chlorospingus semifuscus*): lekking in a nine-primaried oscine? *J. Field Ornithol.* **73**, 281-91.
49. Boles WE. 1988 *The robins and flycatchers of Australia*. North Ryde: Angus & Robertson.
50. Borges SH & Cardoso RM. 1995 Ninho e ovos de *Caryothraustes canadensis* (Passeriformes: Emberizidae). *Ararajuba* **3**, 76.
51. Borrow N & Demey R. 2001 *Birds of western Africa*. London: Helm.
52. Brazil MA. 1991 *The birds of Japan*. Washington DC: Smithsonian Institution Press.
53. Bregulla H. 1992 *Birds of Vanuatu*. Shropshire: Anthony Nelson.
54. Brewer D & MacKay BK. 2001 *Wrens, dippers and thrashers*. London: Christopher Helm.
55. Briskie JV. 1994 Smith's longspur. In *Birds of North America: Life Histories for the Twenty-First Century*, (ed. A. Poole, P. Stettenheim & F. Gill), pp. 1-16. Washington, D.C.: American Ornithologist's Union and Academy of Natural Sciences, Philadelphia
56. Brooke MD & Hartley IR. 1995 Nesting Henderson reed-warblers (*Acrocephalus vaughani taiti*) studied by DNA fingerprinting: unrelated coalitions in a stable habitat? *Auk* **112**, 77-86.
57. Brosset A. 1978 Social organization and nest-building in the forest weaver birds of the genus *Malimbus* (Ploceinae). *Ibis* **120**, 27-.
58. Brown BT. 1993 Bell's vireo. In *Birds of North America: Life Histories for the Twenty-First Century*, (ed. A. Poole, P. Stettenheim & F. Gill), pp. 1-20. Washington, D.C.: American Ornithologist's Union and Academy of Natural Sciences, Philadelphia
59. Brown CR. 1997 Purple martin. In *Birds of North America: Life Histories for the Twenty-First Century*, (ed. A. Poole, P. Stettenheim & F. Gill), pp. 1-32. Washington, D.C.: American Ornithologist's Union and Academy of Natural Sciences, Philadelphia

60. Brown CR & Brown MB. 1995 Cliff swallow. In *Birds of North America: Life Histories for the Twenty-First Century*, (ed. A. Poole, P. Stettenheim & F. Gill), pp. 1-32. Washington, D.C.: American Ornithologist's Union and Academy of Natural Sciences, Philadelphia
61. Brown CR, Knott AM & Damrose EJ. 1992 Violet-green swallow. In *Birds of North America: Life Histories for the Twenty-First Century*, (ed. A. Poole, P. Stettenheim & F. Gill), pp. 1-12. Washington, D.C.: American Ornithologist's Union and Academy of Natural Sciences, Philadelphia
62. Brown JL. 1987 *Helping and communal breeding in birds: ecology and evolution*. Princeton: Princeton University Press.
63. Brush T. 1998 Olive sparrow. In *Birds of North America: Life Histories for the Twenty-First Century*, (ed. A. Poole, P. Stettenheim & F. Gill), pp. 1-12. Washington, D.C.: American Ornithologist's Union and Academy of Natural Sciences, Philadelphia
64. Byers C, Olsson U & Curson J. 1995 *Buntings and sparrows: a guide to the buntings and North American sparrows*. Sussex: Pica Press.
65. Carey M, Berhans DE & Nelson DA. 1994 Field sparrow. In *Birds of North America: Life Histories for the Twenty-First Century*, (ed. A. Poole, P. Stettenheim & F. Gill), pp. 1-20. Washington, D.C.: American Ornithologist's Union and Academy of Natural Sciences, Philadelphia
66. Carlson A. 1986 Group territoriality in the rattling cisticola, *Cisticola chiniana*. *Oikos* **47**, 181-9.
67. Castro I, Minot EO, Fordham RA & Birkhead TR. 1996 Polygynandry, face-to-face copulation and sperm competition in the hibi *Notiomystis cincta* (Aves: Meliphagidae). *Ibis* **138**, 765-71.
68. Cavitt JF & Haas CA. 2000 Brown thrasher. In *Birds of North America: Life Histories for the Twenty-First Century*, (ed. A. Poole, P. Stettenheim & F. Gill), pp. 1-28. Washington, D.C.: American Ornithologist's Union and Academy of Natural Sciences, Philadelphia
69. Cheke AS. 1987a The ecology of the smaller land birds of Mauritius. In *Studies on Mascarene Birds*, (ed. A.W. Diamond), pp. 151-207. Cambridge: Cambridge University Press
70. Cheke AS. 1987b The ecology of the surviving native land birds of Reunion. In *Studies on Mascarene Birds*, (ed. A.W. Diamond), pp. 301-58. Cambridge: Cambridge University Press
71. Cheke AS. 1987c Observations on the surviving endemic birds of Rodriguez. In *Studies on Mascarene Birds*, (ed. A.W. Diamond), pp. 364-400. Cambridge: Cambridge University Press
72. Cheke RA, Mann CF & Allen R. 2001 *Sunbirds: a guide to the sunbirds, flowerpeckers, spiderhunters and sugarbirds of the world*. London: Christopher Helm.
73. Chesser RT. 1994 Migration in South America: an overview of the austral system. *Bird Cons. Int.* **4**, 91-107.
74. Chilton G, Baker MC, Barrentine CD & Cunningham MA. 1995 White-crowned sparrow. In *Birds of North America: Life Histories for the Twenty-First Century*, (ed. A. Poole, P. Stettenheim & F. Gill), pp. 1-28. Washington, D.C.: American Ornithologist's Union and Academy of Natural Sciences, Philadelphia
75. Christian DG & Roberts D. 2000 First description of nest and nesting behavior of the nightingale wren. *Wilson Bull.* **112**, 284-7.
76. Christman BJ & Gaulin SJC. 1998 Unambiguous evidence of helping at the nest in bridled titmice. *Wilson Bull.* **110**, 567-9.
77. Christy MT. 1995 Co-operative care in the singing honeyeater *Lichenostomus virescens*. *Corella* **19**, 115-7.
78. Chu M & Walsberg G. 1999 Phainopepla *Phainopepla nitens*. In *Birds of North America: Life Histories for the Twenty-First Century*, (ed. A. Poole, P. Stettenheim & F. Gill), pp. 1-19. Washington, D.C.: American Ornithologist's Union and Academy of Natural Sciences, Philadelphia
79. Cicero C. 2000 Oak titmouse. Juniper titmouse. In *Birds of North America: Life Histories for the Twenty-First Century*, (ed. A. Poole, P. Stettenheim & F. Gill), pp. 1-28. Washington, D.C.: American Ornithologist's Union and Academy of Natural Sciences, Philadelphia
80. Cimprich DA & Moore FR. 1995 Gray catbird. In *Birds of North America: Life Histories for the Twenty-First Century*, (ed. A. Poole, P. Stettenheim & F. Gill), pp. 1-20. Washington, D.C.: American Ornithologist's Union and Academy of Natural Sciences, Philadelphia
81. Cimprich DA, Moore FR & Guilfoyle MP. 2000 Red-eyed vireo. In *Birds of North America: Life Histories for the Twenty-First Century*, (ed. A. Poole, P. Stettenheim & F. Gill), pp. 1-24. Washington, D.C.: American Ornithologist's Union and Academy of Natural Sciences, Philadelphia
82. Clapp GE. 1993 The nest and nestling of the crested berrypecker *Paramythia montium*. *Muruk* **6**, 43.
83. Clapp GE. 1994 The nest of the mottled whistler (*Rhagologus leucostigma*). *Muruk* **6**, 16.
84. Clement P, Harris A & Davis J. 1993 *Finches and sparrows*. London: Christopher Helm.
85. Clement P & Hathway R. 2000 *Thrushes*. London: Christopher Helm.
86. Clunie F. 1976 Behaviour and nesting of Fijian white-breasted woodswallows. *Notornis* **20**, 378-80.
87. Coates BJ. 1990 *The birds of Papua New Guinea including the Bismarck Archipelago and Bougainville. Vol. II. Passerines*. Alderley, Queensland: Dove Publications.
88. Coates BJ, Bishop KD & Gardner D. 1997 *A guide to the birds of Wallacea: Sulawesi, the Moluccas and Lesser Sunda Islands, Indonesia*. Alderley, Queensland: Dove Publications.
89. Cody ML. 1998 California thrasher. In *Birds of North America: Life Histories for the Twenty-First Century*, (ed. A. Poole, P. Stettenheim & F. Gill), pp. 1-24. Washington, D.C.: American Ornithologist's Union and Academy of Natural Sciences, Philadelphia
90. Cody ML. 1999 Crissal thrasher *Toxostoma crissale*. In *Birds of North America: Life Histories for the Twenty-First Century*, (ed. A. Poole, P. Stettenheim & F. Gill), pp. 1-28. Washington, D.C.: American Ornithologist's Union and Academy of Natural Sciences, Philadelphia
91. Cohen C & Spottiswoode C. 2000 *Essential birding: western South Africa*. Cape Town: Struik.
92. Collar NJ, Andreev AV, Chan S, Crosby MJ, Surbramanya S & Tobias JA. 2001 *Threatened birds of Asia: The Bird Life International Red Data Book Part B*. Cambridge: Bird Life International.

93. Collar NJ, Gonzaga LP, Krabbe N, Madroño NA, Naranjo LG, et al. 1992 *Threatened birds of the Americas. The ICBP/IUCN Red Data Book. 3rd ed, part 2*. Washington DC: Smithsonian Institution Press.
94. Collar NJ & Stuart SN. 1985 *Threatened birds of Africa and related islands. The ICBP/IUCN Red Data Book. pt 1 3rd ed*. Cambridge: ICBP & IUCN.
95. Collias NE. 1978 Building of one nest by two male Reichenow's weavers. *Scopus* **2**, 101.
96. Collins PW. 1999 Rufous-crowned sparrow. In *Birds of North America: Life Histories for the Twenty-First Century*, (ed. A. Poole, P. Stettenheim & F. Gill), pp. 1-28. Washington, D.C.: American Ornithologist's Union and Academy of Natural Sciences, Philadelphia
97. Conway CJ. 1999 Canada warbler *Wilsonia canadensis*. In *Birds of North America: Life Histories for the Twenty-First Century*, (ed. A. Poole, P. Stettenheim & F. Gill), pp. 1-24. Washington, D.C.: American Ornithologist's Union and Academy of Natural Sciences, Philadelphia
98. Cracraft J & Feinstein J. 2000 What is not a bird of paradise? Molecular and morphological evidence places *Macgregoria* in the Meliphagidae and the Cnemophilinae near the base of the corvoid tree. *Proc. R. Soc. Lond. B* **267**, 233-41.
99. Craig A. 1980 The spectacled weaver, *Ploceus ocularis*, and monogamy in the Ploceinae. In *Proceedings of the Fifth Pan African Ornithological Congress Held at Lilongwe*, (ed. L. J), pp. 477-83
100. Craig A. 1988 The red bishop. Polygyny and a good life expectancy. *African Wildlife* **43**, 155-7.
101. Craig RJ. 1989 Observations on the foraging ecology and social behavior of the bridled white-eye. *Condor* **91**, 187-92.
102. Craig RJ. 1996 Seasonal population surveys and natural history of a Micronesian bird community. *Wilson Bull.* **108**, 246-67.
103. Cramp S, ed. 1988 *The birds of the western Palearctic Vol. V. Tyrant flycatchers to thrushes*. Oxford: Oxford University Press.
104. Cramp S, ed. 1992 *The birds of the western Palearctic Vol. VI. Warblers*. Oxford: Oxford University Press.
105. Cramp S & Perrins CM, eds. 1993 *The birds of the western Palearctic Vol. VII. Flycatchers to shrikes*. Oxford: Oxford University Press.
106. Cramp S & Perrins CM, eds. 1994 *The birds of the western Palearctic Vol. VIII. Crows to finches*. Oxford: Oxford University Press.
107. Cramp S & Perrins CM, eds. 1994b *The birds of the western Palearctic Vol. IX. Buntings and New World Warblers*. Oxford: Oxford University Press.
108. Crook JH. 1958 Études sur le comportement social de *Bubalornis a. albirostris*. *Alauda* **26**, 161-95.
109. Crook JH. 1964 The evolution of social organisation and visual communication in the weaver birds (Ploceinae). *Behaviour Supplement X*, 1-178.
110. Curry RL & Grant PR. 1990 Galápagos mockingbirds: territorial cooperative breeding in a climatically variable environment. In *Cooperative breeding in birds*, (ed. P.B. Stacey & W.D. Koenig), pp. 291-329. Cambridge: Cambridge University Press
111. Curson DR & Goguen CB. 1998 Plumbeous vireo (*Vireo plumbeus*). In *Birds of North America: Life Histories for the Twenty-First Century*, (ed. A. Poole, P. Stettenheim & F. Gill), pp. 1-19. Washington, D.C.: American Ornithologist's Union and Academy of Natural Sciences, Philadelphia
112. Curson J, Quinn D & Beadle D. 1994 *New World warblers*. London: Christopher Helm.
113. Davies NB. 1992 *Dunnock behaviour and social evolution*. Oxford: Oxford University Press.
114. Davis JN. 1995 Hutton's vireo. In *Birds of North America: Life Histories for the Twenty-First Century*, (ed. A. Poole, P. Stettenheim & F. Gill), pp. 1-20. Washington, D.C.: American Ornithologist's Union and Academy of Natural Sciences, Philadelphia
115. Davis JN. 1999 Lawrence's goldfinch. In *Birds of North America: Life Histories for the Twenty-First Century*, (ed. A. Poole, P. Stettenheim & F. Gill), pp. 1-20. Washington, D.C.: American Ornithologist's Union and Academy of Natural Sciences, Philadelphia
116. Dawson WR. 1995 Pine siskin. In *Birds of North America: Life Histories for the Twenty-First Century*, (ed. A. Poole, P. Stettenheim & F. Gill), pp. 1-24. Washington, D.C.: American Ornithologist's Union and Academy of Natural Sciences, Philadelphia
117. Dejong MJ. 1996 Northern rough-winged swallow (*Stelgidopteryx serripennis*). In *Birds of North America: Life Histories for the Twenty-First Century*, (ed. A. Poole, P. Stettenheim & F. Gill), pp. 1-24. Washington, D.C.: American Ornithologist's Union and Academy of Natural Sciences, Philadelphia
118. Derrickson KC & Breitwisch R. 1992 Northern mockingbird. In *Birds of North America: Life Histories for the Twenty-First Century*, (ed. A. Poole, P. Stettenheim & F. Gill), pp. 1-26. Washington, D.C.: American Ornithologist's Union and Academy of Natural Sciences, Philadelphia
119. Di Giacomo AG. 1998 First record of *Emberizoides ypiranganus* for Formosa Province, Argentina, and first description of its nest and eggs. *Hornero* **15**, 51-2.
120. Diamond J. 2002 Dispersal, mimicry, and geographic variation in Northern Melanesian birds. *Pac. Sci.* **56**, 1-22.
121. Diamond J, Pimm SL, Gilpin ME & LeCroy M. 1989 Rapid evolution of character displacement in myzomelid honeyeaters. *Am. Nat.* **134**, 675-708.
122. Dickinson JL & Akre JJ. 1998 Extrapair paternity, inclusive fitness, and within-group benefits of helping in western bluebirds. *Mol. Ecol.* **7**, 95-105.
123. Dickinson JL, Koenig WD & Pitelka FA. 1996 Fitness consequences of helping behavior in the western bluebird. *Behav. Ecol.* **7**, 168-77.
124. Din NA. 1992 Pattern of nest destruction in two village weavers (*Ploceus cucullatus* and *P. nigerrimus*) at Ife, Nigeria. *Afr. J. Ecol.* **30**, 261-8.
125. Dobbs RC, Martin PR & Martin TE. 1998 Green-tailed towhee (*Pipilo chlorurus*). In *Birds of North America: Life Histories for the Twenty-First Century*, (ed. A. Poole, P. Stettenheim & F. Gill), pp. 1-23. Washington, D.C.: American Ornithologist's Union and Academy of Natural Sciences, Philadelphia
126. dos Anjos L & Schuchmann K-L. 1999 Notes on the reproductive behaviour and the nest of the chestnut-bellied euphonia (*Euphonia pectoralis*). *Bull. Brit. Ornithol. Club* **119**, 133-5.

127. Downhower JF. 1978 Observations on the nesting of the small ground finch *Geospiza fuliginosa* and the large cactus ground finch *G. conirostris* on Espanola, Galapagos. *Ibis* **120**, 340-6.
128. Draffan R. 1977 Notes on the yellow-faced myna: *Mino dumonti*. *PNG Bird Society Newsletter* **133**, 8-9.
129. Du Plessis MA, Siegfried WR & Armstrong AJ. 1995 Ecological and life-history correlates of cooperative breeding in South African birds. *Oecologia* **102**, 180-8.
130. Duckworth JW. 1997 Mobbing of a drongo cuckoo *Surniculus lugubris*. *Ibis* **139**, 190-2.
131. Dunning JB. 1993 Bachman's sparrow. In *Birds of North America: Life Histories for the Twenty-First Century*, (ed. A. Poole, P. Stettenheim & F. Gill), pp. 1-16. Washington, D.C.: American Ornithologist's Union and Academy of Natural Sciences, Philadelphia
132. Dunning JB, Jr., Bowers RK, Jr., Suter SJ & Bock CE. 1999 Cassin's sparrow. In *Birds of North America: Life Histories for the Twenty-First Century*, (ed. A. Poole, P. Stettenheim & F. Gill), pp. 1-24. Washington, D.C.: American Ornithologist's Union and Academy of Natural Sciences, Philadelphia
133. Eames JC, Lambert FR & Nguyen C. 1995 Rediscovery of the sooty babbler *Stachyris herberti* in central Vietnam. *Bird Cons. Int.* **5**, 129-35.
134. Earle RA & Herholdt JJ. 1986 Co-operative breeding in the anteating chat. *Ostrich* **57**, 188-9.
135. Eason P. 1992 Optimization of territory shape in heterogeneous habitats: a field study of the red-capped cardinal (*Paroaria gularis*). *J. Anim. Ecol.* **61**, 411-24.
136. Eguchi K, Amano HE & Yamagishi S. 2001 Roosting, range use and foraging behaviour of the sickle-billed vanga, *Falcoelea palliata*, in Madagascar. *Ostrich* **72**, 127-33.
137. Eguchi K, Yamagishi S, Asai S, Nagata H & Hino T. 2002 Helping does not enhance reproductive success of cooperatively breeding rufous vanga in Madagascar. *J. Anim. Ecol.* **71**, 123-30.
138. Eising CM, Komdeur J, Buys J, Reemer M & Richardson DS. 2001 Islands in a desert: breeding ecology of the African Reed Warbler *Acrocephalus baeticatus* in Namibia. *Ibis* **143**, 482-93.
139. Eitner JC. 1997 White-collared seedeater. In *Birds of North America: Life Histories for the Twenty-First Century*, (ed. A. Poole, P. Stettenheim & F. Gill), pp. 1-12. Washington, D.C.: American Ornithologist's Union and Academy of Natural Sciences, Philadelphia
140. Ekman J, Bylin A & Tegelstrom H. 2000 Parental nepotism enhances survival of retained offspring in the Siberian jay. *Behav. Ecol.* **11**, 416-20.
141. Elgood JH. 1975 *Malimbus ibadanensis*: a fresh statement of biology and status. *Bull. Brit. Ornithol. Club* **95**, 78-80.
142. Ellison WG. 1992 Blue-gray gnatcatcher. In *Birds of North America: Life Histories for the Twenty-First Century*, (ed. A. Poole, P. Stettenheim & F. Gill), pp. 1-20. Washington, D.C.: American Ornithologist's Union and Academy of Natural Sciences, Philadelphia
143. England AS & Laudenslayer WF, Jr. 1993 Bendire's thrasher. In *Birds of North America: Life Histories for the Twenty-First Century*, (ed. A. Poole, P. Stettenheim & F. Gill), pp. 1-16. Washington, D.C.: American Ornithologist's Union and Academy of Natural Sciences, Philadelphia
144. Estades CF & Lopez-Calleja MV. 1996 First nesting record of the tamarugo conebill (*Conirostrum tamarugense*). *Auk* **112**, 797-800.
145. Étchécopar RD & Hue F. 1983 *Les oiseaux de Chine de Mongolie et de corée passereaux*.: Societe Nouvelle des Éditions Boubée.
146. Falls JB & Kopachena JG. 1994 White-throated sparrow. In *Birds of North America: Life Histories for the Twenty-First Century*, (ed. A. Poole, P. Stettenheim & F. Gill), pp. 1-32. Washington, D.C.: American Ornithologist's Union and Academy of Natural Sciences, Philadelphia
147. Fancy SG & Ralph CJ. 1997 Apapane. In *Birds of North America: Life Histories for the Twenty-First Century*, (ed. A. Poole, P. Stettenheim & F. Gill), pp. 1-16. Washington, D.C.: American Ornithologist's Union and Academy of Natural Sciences, Philadelphia
148. Fancy SG & Ralph CJ. 1998 'I'iwi. In *Birds of North America: Life Histories for the Twenty-First Century*, (ed. A. Poole, P. Stettenheim & F. Gill), pp. 1-16. Washington, D.C.: American Ornithologist's Union and Academy of Natural Sciences, Philadelphia
149. Feare C & Craig A. 1998 *Starlings and mynas*. London: Christopher Helm.
150. Fessl B, Kleindorfer S, Hoi H & Lorenz K. 1996 Extra male parental behaviour: evidence for an alternative mating strategy in the moustached warbler *Acrocephalus melanopogon*. *J. Avian Biol.* **27**, 88-91.
151. French R. 1973 *A guide to the birds of Trinidad and Tobago*. Pennsylvania: Livingstone.
152. Ficken M & Nosedal J. 1992 Mexican chickadee. In *Birds of North America: Life Histories for the Twenty-First Century*, (ed. A. Poole, P. Stettenheim & F. Gill), pp. 1-12. Washington, D.C.: American Ornithologist's Union and Academy of Natural Sciences, Philadelphia
153. Ficken MS, McLaren MA & Hailman JP. 1996 Boreal chickadee. In *Birds of North America: Life Histories for the Twenty-First Century*, (ed. A. Poole, P. Stettenheim & F. Gill), pp. 1-24. Washington, D.C.: American Ornithologist's Union and Academy of Natural Sciences, Philadelphia
154. Finn PG & Hughes JM. 2001 Helping behaviour in Australian magpies, *Gymnorhina tibicen*. *Emu* **101**, 57-63.
155. Fishpool LDC. 2000 A review of the status, distribution and habitat of Baumann's greenbul *Phyllastrephus baumanni*. *Bull. Brit. Ornithol. Club* **120**, 213-29.
156. Fjeldså J & Krabbe N. 1990 *Birds of the high Andes*. Svenborg: University of Copenhagen and Apollo Books.
157. Fleischer RC, Tarr CL & Pratt TK. 1994 Genetic structure and mating system in the palila, an endangered Hawaiian honeycreeper, as assessed by DNA fingerprinting. *Mol Ecol* **3**, 383-92.
158. Flint VE, Boehme RL, Kostin YV & Kuznetsov AA. 1984 *A field guide to birds of the USSR including eastern Europe and central Asia*. Princeton: Princeton University Press.
159. Forshaw JM & Cooper WT. 1977 *The birds of paradise and bower birds*. Sydney: Collins.

160. Forstmeier W, Leisler B & Kempnaers B. 2001 Bill morphology reflects female independence from male parental help. *Proceedings Royal Society B Biological Sciences* **268**, 1583-8.
161. Foster JT, Scott JM & Sykes PW, Jr. 2000 'Akikiki. In *Birds of North America: Life Histories for the Twenty-First Century*, (ed. A. Poole, P. Stettenheim & F. Gill), pp. 1-16. Washington, D.C.: American Ornithologist's Union and Academy of Natural Sciences, Philadelphia
162. Foster MS, Lopez H NE & Escobar ME. 1989 Observations of a nest of red-crowned ant-tanagers in Paraguay. *J. Field Ornithol.* **60**, 459-68.
163. Fraga RA. 1979 Helpers at the nest in passerines from Buenos Aires Province. *Auk* **96**, 608.
164. Fraga RM. 1991 The social system of a communal breeder, the bay-winged cowbird *Molothrus badius*. *Ethology* **89**, 195-210.
165. Freeman DJ. 1970 The rediscovery of the black grass wren *Amytornis housei* with additional notes on the species. *Emu* **70**, 193-5.
166. Friesen L, Cadman MD & MacKay RJ. 1999 Nesting success of Neotropical migrant songbirds in a highly fragmented landscape. *Conservation Biology* **13**, 338-46.
167. Frith C, Frith D & Watling D. 1989 Notes on the nesting, parental care, and taxonomy of the silktail (*Lamprolia victoriae*) of Fiji. *Notornis* **36**, 96-8.
168. Frith CB & Beehler BM. 1998 *The Birds of Paradise: Paradisaeidae*. Oxford: Oxford University Press.
169. Frith CB & Frith DW. 1985 Parental care and investment in the tooth-billed bowerbird *Scenopoeetes dentirostris* (Ptilonorhynchidae). *Aust. Bird Watcher* **11**, 103-13.
170. Frith CB & Frith DW. 1990 Nesting biology and relationships of the lesser melampitta *Melampitta lugubris*. *Emu* **90**, 65-73.
171. Frith CB & Frith DW. 2001 Nesting biology of the spotted catbird, *Ailuroedus melanotis*, a monogamous bowerbird (Ptilonorhynchidae), in Australian Wet Tropics upland rainforests. *Aust. J. Zool.* **49**, 279-310.
172. Frith CB, Frith DW & Jansen A. 1997 Nesting biology of the chowchilla *Orthonyx spaldingii*. *Emu* **97**, 18-30.
173. Fry CH. 1992 Nests of golden-winged grosbeak in Oman. *Phoenix* **9**, 28-30.
174. Fry CH, Keith S & Urban EK, eds. 2000 *The Birds of Africa Vol VI*. London: Academic Press.
175. Ganguly JK. 1986 Co-operative feeding of chicks of the purple-rumped sunbird (*Nectarinia zeylonica*). *J. Bomb. Nat. Hist. Soc.* **83**, 447.
176. Gardali T & Ballard G. 2000 Warbling vireo. In *Birds of North America: Life Histories for the Twenty-First Century*, (ed. A. Poole, P. Stettenheim & F. Gill), pp. 1-27. Washington, D.C.: American Ornithologist's Union and Academy of Natural Sciences, Philadelphia
177. Gardner JL. 2002 Breeding biology of the speckled warbler, *Chthonicola sagittata*. *Aust. J. Zool.* **50**, 169-81.
178. Garrido OH & Kirkconnell A. 2000 *Birds of Cuba*. Ithaca, New York: Comstock.
179. Garrison BA. 1999 Bank swallow *Riparia riparia*. In *Birds of North America: Life Histories for the Twenty-First Century*, (ed. A. Poole, P. Stettenheim & F. Gill), pp. 1-27. Washington, D.C.: American Ornithologist's Union and Academy of Natural Sciences, Philadelphia
180. Gaston AJ. 1978 Demography of the jungle babbler, *Turdoides striatus*. *J. Anim. Ecol.* **47**, 845-70.
181. Gaston AJ. 1978 Ecology of the common babbler *Turdoides caudatus*. *Ibis* **120**, 415-32.
182. Gaston AJ. 1978 Social behaviour of the yellow-eyed babbler *Chrysomma sinensis*. *Ibis* **120**, 361-4.
183. Gatter W & Gardner R. 1993 The biology of the Gola malimbe *Malimbus ballmanni* Wolters 1974. *Bird Cons. Int.* **3**, 87-103.
184. Gayou DC. 1995 Green jay. In *Birds of North America: Life Histories for the Twenty-First Century*, (ed. A. Poole, P. Stettenheim & F. Gill), pp. 1-12. Washington, D.C.: American Ornithologist's Union and Academy of Natural Sciences, Philadelphia
185. Geupel GR & DeSante DF. 1990 Incidence and determinants of double brooding in wrentits. *Condor* **92**, 67-75.
186. Gill FB, Canterbury RA & Confer JL. 2001 Blue-winged warbler: *Vermivora pinus*. In *Birds of North America: Life Histories for the Twenty-First Century*, (ed. A. Poole, P. Stettenheim & F. Gill), pp. 1-23. Washington, D.C.: American Ornithologist's Union and Academy of Natural Sciences, Philadelphia
187. Gill FBA, 35-60. 1971 Ecology and evolution of sympatric mascarene white eyes, *Zosterops borbonica* and *Zosterops olivacea*. *Auk* **88**, 35-60.
188. Gill MJ & Krannitz PG. 1997 A case of helping behavior at a Brewer's Sparrow, *Spizella breweri*, nest. *Can. Field Nat.* **111**, 650-2.
189. Gillihan SW & Byers B. 2001 Evening grosbeak: *Coccothraustes vespertinus*. In *Birds of North America: Life Histories for the Twenty-First Century*, (ed. A. Poole, P. Stettenheim & F. Gill), pp. 1-23. Washington, D.C.: American Ornithologist's Union and Academy of Natural Sciences, Philadelphia
190. Gomez J, Monros JS & Gil-Delgado JA. 2000 Notas sobre la biología de la tangara azuleja *Thraupis episcopus* in Santa Clara (Costa Rica). *Ardeola* **47**, 265-7.
191. Goodwin D. 1982 *Estrildid finches of the world*. Oxford: Oxford University Press.
192. Gowaty PA & Plissner JH. 1998 Eastern bluebird *Sialia sialis*. In *Birds of North America: Life Histories for the Twenty-First Century*, (ed. A. Poole, P. Stettenheim & F. Gill), pp. 1-32. Washington, D.C.: American Ornithologist's Union and Academy of Natural Sciences, Philadelphia
193. Grant PR. 1986 *Ecology and evolution of Darwin's finches*. Princeton: Princeton University Press.
194. Grant PR & Grant BR. 1980 The breeding and feeding characteristics of Darwin's finches on Isla Genovesa, Galapagos. *Ecol. Monog.* **50**, 381-410.
195. Green DJ & Cockburn A. 1999 Life history and demography of an uncooperative Australian passerine, the brown thornbill. *Aust. J. Zool.* **47**, 633-49.
196. Greene E, Muehter VR & Davison W. 1996 Lazuli bunting (*Passerina amoena*). In *Birds of North America: Life Histories for the Twenty-First Century*, (ed. A. Poole, P. Stettenheim & F. Gill), pp. 1-24. Washington, D.C.: American Ornithologist's Union and Academy of Natural Sciences, Philadelphia

197. Greenlaw JS. 1996 Eastern towhee. In *Birds of North America: Life Histories for the Twenty-First Century*, (ed. A. Poole, P. Stettenheim & F. Gill), pp. 1-32. Washington, D.C.: American Ornithologist's Union and Academy of Natural Sciences, Philadelphia
198. Greenlaw JS. 1996 Spotted towhee. In *Birds of North America: Life Histories for the Twenty-First Century*, (ed. A. Poole, P. Stettenheim & F. Gill), pp. 1-32. Washington, D.C.: American Ornithologist's Union and Academy of Natural Sciences, Philadelphia
199. Greenlaw JS & Rising JD. 1994 Sharp-tailed sparrow. In *Birds of North America: Life Histories for the Twenty-First Century*, (ed. A. Poole, P. Stettenheim & F. Gill), pp. 1-28. Washington, D.C.: American Ornithologist's Union and Academy of Natural Sciences, Philadelphia
200. Grimes LG. 1973 The breeding of Heuglin's masked weaver and its nesting association with the red weaver ant. *Ostrich* **44**, 170-5.
201. Grimes LG. 1976 The occurrence of cooperative breeding behaviour in African birds. *Ostrich* **47**, 1-15.
202. Groschupf K. 1992 Five-striped sparrow. In *Birds of North America: Life Histories for the Twenty-First Century*, (ed. A. Poole, P. Stettenheim & F. Gill), pp. 1-12. Washington, D.C.: American Ornithologist's Union and Academy of Natural Sciences, Philadelphia
203. Groschupf KD & Thompson CW. 1998 Varied bunting. In *Birds of North America: Life Histories for the Twenty-First Century*, (ed. A. Poole, P. Stettenheim & F. Gill), pp. 1-20. Washington, D.C.: American Ornithologist's Union and Academy of Natural Sciences, Philadelphia
204. Groth JG. 2000 Molecular evidence for the systematic position of *Urocynchramus pylzowi*. *Auk* **117**, 787-91.
205. Grubb TC, Jr. & Pravousudov VV. 1994 Tufted titmouse. In *Birds of North America: Life Histories for the Twenty-First Century*, (ed. A. Poole, P. Stettenheim & F. Gill), pp. 1-16. Washington, D.C.: American Ornithologist's Union and Academy of Natural Sciences, Philadelphia
206. Grzybowski JA. 1995 Black-capped vireo. In *Birds of North America: Life Histories for the Twenty-First Century*, (ed. A. Poole, P. Stettenheim & F. Gill), pp. 1-24. Washington, D.C.: American Ornithologist's Union and Academy of Natural Sciences, Philadelphia
207. Guzy MJ, Ribic CA & Sample DW. 2002 Helping at a Henslow's Sparrow nest in Wisconsin. *Wilson Bull.* **114**, 407-9.
208. Haggerty TM & Morton ES. 1995 Carolina wren. In *Birds of North America: Life Histories for the Twenty-First Century*, (ed. A. Poole, P. Stettenheim & F. Gill), pp. 1-20. Washington, D.C.: American Ornithologist's Union and Academy of Natural Sciences, Philadelphia
209. Hahn TP. 1996 Cassin's finch (*Carpodacus cassinii*). In *Birds of North America: Life Histories for the Twenty-First Century*, (ed. A. Poole, P. Stettenheim & F. Gill), pp. 1-20. Washington, D.C.: American Ornithologist's Union and Academy of Natural Sciences, Philadelphia
210. Hails C. 1987 *Birds of Singapore*. Singapore: Times Editions.
211. Haines CM. 1989 Breeding the red-tailed laughing-thrush *Garrulax milnei* at Padstow tropical bird gardens (Cornwall). *Avicult. Mag.* **95**, 10-3.
212. Halkin SL & Linville SU. 1999 Northern cardinal. In *Birds of North America: Life Histories for the Twenty-First Century*, (ed. A. Poole, P. Stettenheim & F. Gill), pp. 1-32. Washington, D.C.: American Ornithologist's Union and Academy of Natural Sciences, Philadelphia
213. Hall ML & Magrath RD. 2000 Duetting and mate-guarding in Australian magpie-larks (*Grallina cyanoleuca*). *Behav. Ecol. Sociobiol.* **47**, 180-7.
214. Hamao S. 1992 Lack of pair-bond: a polygynous mating system of the Japanese bush warbler *Cettia diphone*. *Jap. J. Ornithol.* **40**, 51-65.
215. Hamao S. 2000 The cost of mate guarding in the black-browed reed warbler *Acrocephalus bistrigiceps*: when do males stop guarding their mates? *J. Yamashina Inst. Ornithol.* **32**, 1-12.
216. Hamao S, Matsubara H, Kajita M & Mitamura A. 2001 A record of a male bush warbler feeding its fledglings. *Strix* **19**, 187-9.
217. Hamao S & Ueda K. 1998 Nest sharing by polygynously mated females in the black-browed reed warbler *Acrocephalus bistrigiceps*. *Ibis* **140**, 176-8.
218. Hanmer D. 1979 The brown-throated golden weaver *Ploceus xanthopterus* nesting in trees. *Honeyguide* **100**, 20-1.
219. Hannecart F & Letocart Y. 1980 Donnees sur la reproduction de *Gerygone flavolateralis*. *Ois. Rev. Franc. Ornithol.* **50**, 65-8.
220. Hannecart F & Letocart Y. 1980 *Oiseaux de Nouvelle Calédonie et des Loyautés. Tome 1 Volume 1*. Noumea: Les Editions Cardinaills.
221. Harrap S & Quinn D. 1996 *Tits, nuthatches and treecreepers*. London: Christopher Helm.
222. Harris T & Arnott G. 1988 *The shrikes of southern Africa*. Cape Town: Struik Winchester.
223. Harris T & Franklin K. 2000 *Shrikes and bush-shrikes including wood-shrikes, helmet-shrikes, flycatcher-shrikes, philentomas, batises and wattle-eyes*. London: Christopher Helm.
224. Hatchwell BJ, Ross DJ, Chaline N, Fowle MK & Burke TA. 2002 Parentage in the cooperative breeding system of long-tailed tits, *Aegithalos caudatus*. *Anim. Behav.* **64**, 55-63.
225. Heinsohn R, Dunn P, Legge S & Double M. 2000 Coalitions of relatives and reproductive skew in cooperatively breeding white-winged choughs. *Proc. R. Soc. Lond. B* **267**, 243-9.
226. Herkert JR, Kroodsma DE & Gibbs JP. 2001 Sedge wren: *Cistothorus platensis*. In *Birds of North America: Life Histories for the Twenty-First Century*, (ed. A. Poole, P. Stettenheim & F. Gill), pp. 1-19. Washington, D.C.: American Ornithologist's Union and Academy of Natural Sciences, Philadelphia
227. Higgins PJ & Peter JM, eds. 2002 *Handbook of Australian, New Zealand and Antarctic Birds. Volume 6. Pardalotes to Figbird*. Melbourne: Oxford University Press.
228. Higgins PJ, Peter JM & Steele WK, eds. 2001 *Handbook of Australian, New Zealand and Antarctic Birds. Volume 5: Tyrant-flycatchers to Chats*. Melbourne: Oxford University Press.

- 229 . Higuchi H, Kanai Y, Kawakubo N, Koura T, Santanda F, et al. 1990 Frequency of use of nest boxes and breeding ecology of the Ryukyu robin *Erithacus komadori* on Nakano-shima in the Tokara Islands. *Strix* **9**, 1-13.
- 230 . Higuchi H, Nakane M & Maru T. 1993 Home range and pair duration of the Bonin Islands honeyeater *Apalopteron familiare*. *Strix* **12**, 23-33.
- 231 . Hill DP & Gould LK. 1997 Chestnut-collared longspur. In *Birds of North America: Life Histories for the Twenty-First Century*, (ed. A. Poole, P. Stettenheim & F. Gill), pp. 1-20. Washington, D.C.: American Ornithologist's Union and Academy of Natural Sciences, Philadelphia
- 232 . Hill GE. 1993 House finch. In *Birds of North America: Life Histories for the Twenty-First Century*, (ed. A. Poole, P. Stettenheim & F. Gill), pp. 1-24. Washington, D.C.: American Ornithologist's Union and Academy of Natural Sciences, Philadelphia
- 233 . Hill GE. 1995 Black-headed grosbeak. In *Birds of North America: Life Histories for the Twenty-First Century*, (ed. A. Poole, P. Stettenheim & F. Gill), pp. 1-20. Washington, D.C.: American Ornithologist's Union and Academy of Natural Sciences, Philadelphia
- 234 . Hilty SL. 2003 *Birds of Venezuela*. Princeton: Princeton University Press.
- 235 . Hilty SL & Brown WL. 1986 *A guide to the birds of Colombia*. Princeton: Princeton University Press.
- 236 . Hoag DJ. 2000 An instance of helping behavior in northern rough-winged swallows. *Wilson Bull.* **112**, 281-2.
- 237 . Holmes RT, Frauenknecht BD & Du Plessis MA. 2002 Breeding system of the cape rockjumper, a South African fynbos endemic. *Condor* **104**, 188-92.
- 238 . Hopp SL, Kirby A & Boone CA. 2000 White-eyed vireo. In *Birds of North America: Life Histories for the Twenty-First Century*, (ed. A. Poole, P. Stettenheim & F. Gill), pp. 1-20. Washington, D.C.: American Ornithologist's Union and Academy of Natural Sciences, Philadelphia
- 239 . Howell SNG & Webb S. 1995 *A guide to the birds of Mexico and northern Central America*. Oxford: Oxford University Press.
- 240 . Hsu MJ & Lin Y-S. 1997 Breeding ecology of Styan's bulbul *Pycnonotus taivanus* in Taiwan. *Ibis* **139**, 518-22.
- 241 . Hudgens BR. 1997 Nest predation avoidance by the blue-billed malimbe *Malimbus nitens* (Ploceinae). *Ibis* **139**, 692-4.
- 242 . Hudon J. 1999 Western tanager. In *Birds of North America: Life Histories for the Twenty-First Century*, (ed. A. Poole, P. Stettenheim & F. Gill), pp. 1-28. Washington, D.C.: American Ornithologist's Union and Academy of Natural Sciences, Philadelphia
- 243 . Huels TR. 1982 Co-operative feeding of conspecific and *Clamator jacobinus* young by *Turdoides rubiginosus*. *Scopus* **6**, 33-5.
- 244 . Hunt PD & Eliason BC. 1999 Blackpoll warbler. In *Birds of North America: Life Histories for the Twenty-First Century*, (ed. A. Poole, P. Stettenheim & F. Gill), pp. 1-24. Washington, D.C.: American Ornithologist's Union and Academy of Natural Sciences, Philadelphia
- 245 . Hustler K. 2000 The breeding biology of the chirping cisticola in north-western Zimbabwe. *Honeyguide* **46**, 4-12.
- 246 . Hustler K. 2001 The breeding biology of the black-backed cisticola in north-west Zimbabwe with notes on song and specific status. *Honeyguide* **47**, 25-36.
- 247 . Impey AJ, Cote IM & Jones CG. 2002 Population recovery of the threatened endemic Rodrigues fody (*Foudia flavicans*) (Aves, Ploceidae) following reforestation. *Biol. Cons.* **107**, 299-305.
- 248 . Ingold JL. 1993 Blue grosbeak. In *Birds of North America: Life Histories for the Twenty-First Century*, (ed. A. Poole, P. Stettenheim & F. Gill), pp. 1-16. Washington, D.C.: American Ornithologist's Union and Academy of Natural Sciences, Philadelphia
- 249 . Ingold JL & Galati R. 1997 Golden-crowned kinglet. In *Birds of North America: Life Histories for the Twenty-First Century*, (ed. A. Poole, P. Stettenheim & F. Gill), pp. 1-28. Washington, D.C.: American Ornithologist's Union and Academy of Natural Sciences, Philadelphia
- 250 . Ingold JL & Wallace GE. 1994 Ruby-crowned kinglet. *Regulus calendula*. In *Birds of North America: Life Histories for the Twenty-First Century*, (ed. A. Poole, P. Stettenheim & F. Gill), pp. 1-24. Washington, D.C.: American Ornithologist's Union and Academy of Natural Sciences, Philadelphia
- 251 . Ishida K, Takashi M & Ueta M. 1998 A breeding record of Lidth's jay in a nest box at a natural forest of Kinsakubaru on Amami Island. *Strix* **16**, 148-51.
- 252 . Islam MA. 1989 Nest destruction and cannibalistic behaviour of laughing thrushes, *Garrulax* spp. (Aves: Muscicapidae). *Bangladesh J. Zool.* **17**, 15-7.
- 253 . Islam MA. 1994 Breeding habits of the Nilgiri laughing thrush *Garrulax cachinnans* (Jerdon). *J. Bomb. Nat. Hist. Soc.* **91**, 16-28.
- 254 . Islam MA. 1995 Breeding behaviour of the whitebreasted laughing thrush *Garrulax jerdoni* Blyth (Aves: Muscicapidae). *Bangladesh J. Zool.* **23**, 125-32.
- 255 . Isler ML & Isler PR. 1999 *Tanagers*. London: Christopher Helm.
- 256 . Jackson WM. 1992 Estimating conspecific nest parasitism in the northern masked weaver based on within-female variability in egg appearance. *Auk* **109**, 435-43.
- 257 . James RD. 1996 Philadelphia vireo. In *Birds of North America: Life Histories for the Twenty-First Century*, (ed. A. Poole, P. Stettenheim & F. Gill), pp. 1-12. Washington, D.C.: American Ornithologist's Union and Academy of Natural Sciences, Philadelphia
- 258 . James RD. 1998 Blue-headed vireo *Vireo solitarius*. In *Birds of North America: Life Histories for the Twenty-First Century*, (ed. A. Poole, P. Stettenheim & F. Gill), pp. 1-24. Washington, D.C.: American Ornithologist's Union and Academy of Natural Sciences, Philadelphia
- 259 . Jansen A. 1999 Home ranges and group-territoriality in chowchillas *Orthonyx spaldingii*. *Emu* **99**, 280-90.
- 260 . Jaramillo A & Burke P. 1999 *New world blackbirds: the icterids*. London: Christopher Helm.
- 261 . Johnson KP & Lanyon SM. 1999 Molecular systematics of the grackles and allies, and the effect of additional sequence (cyt b and ND2). *Auk* **116**, 759-68.



262. Johnson LS. 1998 House wren *Troglodytes aedon*. In *Birds of North America: Life Histories for the Twenty-First Century*, (ed. A. Poole, P. Stettenheim & F. Gill), pp. 1-32. Washington, D.C.: American Ornithologist's Union and Academy of Natural Sciences, Philadelphia
263. Johnson RE, Hendricks P, Pattie DL & Hunter KB. 2000 Brown-capped rosy-finch: *Leucosticte australis*. In *Birds of North America: Life Histories for the Twenty-First Century*, (ed. A. Poole, P. Stettenheim & F. Gill), pp. 1-24. Washington, D.C.: American Ornithologist's Union and Academy of Natural Sciences, Philadelphia
264. Johnson RR & Haight LT. 1996 Canyon towhee. In *Birds of North America: Life Histories for the Twenty-First Century*, (ed. A. Poole, P. Stettenheim & F. Gill), pp. 1-20. Washington, D.C.: American Ornithologist's Union and Academy of Natural Sciences, Philadelphia
265. Jones SL & Dieni JS. 1995 Canyon wren. In *Birds of North America: Life Histories for the Twenty-First Century*, (ed. A. Poole, P. Stettenheim & F. Gill), pp. 1-12. Washington, D.C.: American Ornithologist's Union and Academy of Natural Sciences, Philadelphia
266. Jullien M & Cariveau DP. 2001 First description of the nest of the wing-banded wren in French Guiana. *Wilson Bull.* **113**, 398-403.
267. Karubian J. 2001 The social organization and mating system of the striated grasswren. *Condor* **103**, 412-7.
268. Kaspari M & O'Leary H. 1988 Non-parental attendants in a north-temperate migrant. *Auk* **105**, 792-3.
269. Keith S, Urban EK & Fry CH, eds. 1992 *The birds of Africa Vol IV*. London: Academic Press.
270. Kennedy ED & White DW. 1997 Bewick's wren (*Thryomanes bewickii*). In *Birds of North America: Life Histories for the Twenty-First Century*, (ed. A. Poole, P. Stettenheim & F. Gill), pp. 1-28. Washington, D.C.: American Ornithologist's Union and Academy of Natural Sciences, Philadelphia
271. Kennedy RS, Gonzales PC, Dickinson EC, Miranda HC & Fisher TH. 2000 *A guide to the birds of the Philippines*. Oxford: Oxford University Press.
272. Kiltie RA & Fitzpatrick JW. 1984 Reproduction and social organization of the black-capped donacobius (*Donacobius atricapillus*) in southeastern Peru. *Auk* **101**, 804-11.
273. Kim C-H, Yamagishi S & Won P-O. 1992 Social organization of the crow tit *Paradoxornis webbiana* during the non-breeding season. *Jap. J. Ornithol.* **40**, 93-107.
274. Kim C-H, Yamagishi S & Won P-O. 1995 Egg-color dimorphism and breeding success in the crow tit (*Paradoxornis webbiana*). *Auk* **112**, 831-9.
275. King DI, Champlin TB & Champlin PJ. 2000 An observation of cooperative breeding in the ovenbird. *Wilson Bull.* **112**, 287-8.
276. Kingery HE & Ghalambor CK. 2001 Pygmy nuthatch: *Sitta pygmaea*. In *Birds of North America: Life Histories for the Twenty-First Century*, (ed. A. Poole, P. Stettenheim & F. Gill), pp. 1-31. Washington, D.C.: American Ornithologist's Union and Academy of Natural Sciences, Philadelphia
277. Knapton RW. 1994 Clay-colored sparrow. *Spizella pallida*. In *Birds of North America: Life Histories for the Twenty-First Century*, (ed. A. Poole, P. Stettenheim & F. Gill), pp. 1-16. Washington, D.C.: American Ornithologist's Union and Academy of Natural Sciences, Philadelphia
278. Komdeur J. 1992 Importance of habitat saturation and territory quality for evolution of cooperative breeding in the Seychelles warbler. *Nature* **358**, 493-95.
279. Kroodsma DE & Verner J. 1997 Marsh wren (*Cistothorus palustris*). In *Birds of North America: Life Histories for the Twenty-First Century*, (ed. A. Poole, P. Stettenheim & F. Gill), pp. 1-32. Washington, D.C.: American Ornithologist's Union and Academy of Natural Sciences, Philadelphia
280. Kumar Sharma S. 1992 Relationship between canopy density and breeding behaviour of *Ploceus philippinus* (Linn.) and *Ploceus benghalensis* (Linn.). *J. Bomb. Nat. Hist. Soc.* **89**, 78-83.
281. La Marca G & Thorstrom R. 2000 Breeding biology, diet and vocalization of the helmet vanga, *Euryceros prevostii*, on the Masoala Peninsula, Madagascar. *Ostrich* **71**, 400-3.
282. Lack D. 1968 *Ecological adaptations for breeding in birds*. London: Chapman & Hall.
283. Langen TA. 1996 The mating system of the white-throated magpie-jay *Calocitta formosa* and Greenwood's hypothesis for sex-biased dispersal. *Ibis* **138**, 506-13.
284. Langrand O. 1990 *Guide to the birds of Madagascar*. New Haven: Yale University Press.
285. Lanyon SM. 1992 Interspecific brood parasitism in blackbirds (Icterinae): a phylogenetic perspective. *Science* **255**, 77-9.
286. Lanyon SM. 1994 Polyphyly of the blackbird genus *Agelaius* and the importance of assumptions of monophyly in comparative studies. *Evolution* **48**, 679-93.
287. Lanyon SM & Omland KE. 1999 A molecular phylogeny of the blackbirds (Icteridae): five lineages revealed by cytochrome-b sequence data. *Auk* **116**, 629-39.
288. Lavrenchenko LA. 1984 Factors influencing the nesting success of the tricolor flycatcher (*Ficedula zanthopygia*). *Ornitologiya* **19**, 204-5.
289. Lawn MR. 1996 Two male willow warblers at same nest. *Brit. Birds* **89**, 319-20.
290. Lefranc N & Worfolk T. 1997 *Shrikes: a guide to shrikes of the world*. Sussex: Pica Press.
291. Legge S & Heinsohn R. 1996 Cooperative breeding in hooded pitohuis *Pitohui dichrous*. *Emu* **96**, 139-40.
292. Lepson JK. 1997 'Anianiau (*Hemignathus parvus*). In *Birds of North America: Life Histories for the Twenty-First Century*, (ed. A. Poole, P. Stettenheim & F. Gill), pp. 1-16. Washington, D.C.: American Ornithologist's Union and Academy of Natural Sciences, Philadelphia
293. Lepson JK & Freed LA. 1997 Akepa. In *Birds of North America: Life Histories for the Twenty-First Century*, (ed. A. Poole, P. Stettenheim & F. Gill), pp. 1-24. Washington, D.C.: American Ornithologist's Union and Academy of Natural Sciences, Philadelphia
294. Lepson JK & Johnston SM. 2000 Greater 'akialoa; lesser 'akialoa. In *Birds of North America: Life Histories for the Twenty-First Century*, (ed. A. Poole, P. Stettenheim & F. Gill), pp. 1-23. Washington, D.C.: American Ornithologist's Union and Academy of Natural Sciences, Philadelphia

295. Lepson JK & Pratt HD. 1997 Akekee. In *Birds of North America: Life Histories for the Twenty-First Century*, (ed. A. Poole, P. Stettenheim & F. Gill), pp. 1-16. Washington, D.C.: American Ornithologist's Union and Academy of Natural Sciences, Philadelphia
296. Lewis DM. 1981 Determinants of reproductive success of the white-browed sparrow weaver, *Plocepasser mahali*. *Behav. Ecol. Sociobiol.* **9**, 83-93.
297. Lewis DM. 1982 Cooperative breeding in a population of white-browed sparrow weavers *Plocepasser mahali*. *Ibis* **124**, 511-22.
298. Lin L, Alexander P & Severinghaus L. 1998 Breeding ecology of tawny and yellow-bellied wren warblers (*Prinia subflava* and *P. flaviventris*). *Bull. Inst. Zool. Acad. Sinica (Taipei)* **27**, 57-66.
299. Lindsey GD, Vanderwerf EA, Baker H & Baker PE. 1998 Hawaii'i 'amakihi. Kaua'i 'amakihi. O'ahu 'amakihi. Greater 'amakihi. In *Birds of North America: Life Histories for the Twenty-First Century*, (ed. A. Poole, P. Stettenheim & F. Gill), pp. 1-28. Washington, D.C.: American Ornithologist's Union and Academy of Natural Sciences, Philadelphia
300. Lohmus M & Silverin B. 1999 Male aggressiveness and the possible occurrence of group territoriality in the brambling *Fringilla montifringilla*. *Ornis Svecica* **9**, 75-82.
301. Löhr H & Thaler E. 1992 Behavioural traits as an aid to solving taxonomic problems. *Bull. Brit. Ornithol. Club* **112A**, 199-208.
302. Löhr H, Thaler E & Christie DA. 1996 Status and behaviour of the Tenerife goldcrest. *Brit. Birds* **89**, 376-86.
303. Long AJ & Heath MF. 1994 Nesting ecology and helping behaviour in the azure-rumped tanager in Mexico. *Condor* **96**, 1095-9.
304. Longmore W. 1991 *Honeyeaters and their allies of Australia*. North Ryde: Angus & Robertson.
305. Lord Medway & Wells D. 1976 *The birds of the Malay peninsula: a general account of the birds inhabiting the region from the isthmus of Kra to Singapore with the adjacent islands. V: Conclusion, and survey of every species*. Hertfordshire: HF & G Witherby.
306. Lovett R & Lovett V. 2001 Defence of nest site by a group of fork-tailed drongos *Dicrurus adsimilis*. *Babbler* **38**, 23.
307. Lowther PE. 1996 Le Conte's sparrow. In *Birds of North America: Life Histories for the Twenty-First Century*, (ed. A. Poole, P. Stettenheim & F. Gill), pp. 1-16. Washington, D.C.: American Ornithologist's Union and Academy of Natural Sciences, Philadelphia
308. Lowther PE. 2001 New name for the Bolivian blackbird. *Bull. Brit. Ornithol. Club* **121**, 280-1.
309. Lowther PE, Groschupf KD & Russell SM. 1999 Rufous-winged sparrow *Aimophila carpalis*. In *Birds of North America: Life Histories for the Twenty-First Century*, (ed. A. Poole, P. Stettenheim & F. Gill), pp. 1-20. Washington, D.C.: American Ornithologist's Union and Academy of Natural Sciences, Philadelphia
310. Lowther PE, Kroodsma DE & Farley GH. 2000 Rock wren. In *Birds of North America: Life Histories for the Twenty-First Century*, (ed. A. Poole, P. Stettenheim & F. Gill), pp. 1-20. Washington, D.C.: American Ornithologist's Union and Academy of Natural Sciences, Philadelphia
311. Lowther PE, Lanyon SM & Thompson CW. 1999 Painted bunting. In *Birds of North America: Life Histories for the Twenty-First Century*, (ed. A. Poole, P. Stettenheim & F. Gill), pp. 1-24. Washington, D.C.: American Ornithologist's Union and Academy of Natural Sciences, Philadelphia
312. Lowther PE & Necedal J. 1997 Olive warbler (*Peucedramus taeniatus*). In *Birds of North America: Life Histories for the Twenty-First Century*, (ed. A. Poole, P. Stettenheim & F. Gill), pp. 1-12. Washington, D.C.: American Ornithologist's Union and Academy of Natural Sciences, Philadelphia
313. Lusk M, Hess S, Reynolds M & Johnston S. 2000 Population status of the Tinian monarch (*Monarcha takatsukasae*) on Tinia, Commonwealth of the Northern Mariana Islands. *Micronesica* **32**, 181-90.
314. Lusk MR & Taisacan E. 1997 Description of a bridled white-eye nest from Rota, Mariana Islands. *Micronesica* **30**, 183-5.
315. Lyon B & Montgomerie R. 1995 Snow bunting. McKay's bunting. In *Birds of North America: Life Histories for the Twenty-First Century*, (ed. A. Poole, P. Stettenheim & F. Gill), pp. 1-28. Washington, D.C.: American Ornithologist's Union and Academy of Natural Sciences, Philadelphia
316. Ma S. 1988 Studies on the population ecology of the Chinese crowtit. *Zool. Res.* **9**, 217-24.
317. MacDougall-Shackleton SA, Johnson RE & Hahn TP. 2000 Gray-crowned rosy-finch. In *Birds of North America: Life Histories for the Twenty-First Century*, (ed. A. Poole, P. Stettenheim & F. Gill), pp. 1-16. Washington, D.C.: American Ornithologist's Union and Academy of Natural Sciences, Philadelphia
318. Mace ME. 1991 Breeding and hand-rearing Tickell's laughing thrush *Garrulax strepitans* at the San Diego Wild Animal Park. *Int. Zoo Yearbook* **30**, 187-91.
319. MacKinnon J & Phillips K. 1993 *A field guide to the Birds of Borneo, Sumatra, Java and Bali*. Oxford: Oxford University Press.
320. MacKinnon J & Phillips K. 2000 *A field guide to the birds of China*. Oxford: Oxford University Press.
321. Mackness B. 1976 A helper at the nest of the brown warbler. *Sunbird* **7**, 79.
322. Mackworth-Praed CW & Grant CHB. 1955 *African handbook of birds. Series 1, Volume 2. Birds of eastern and north-eastern Africa*. London: Longman.
323. Mackworth-Praed CW & Grant CHB. 1973 *African handbook of birds. Series 3, Volume 2. Birds of west central and western Africa*. London: Longman.
324. Maclean GL. 1993 *Roberts' birds of southern Africa. Sixth edition*. Cape Town: John Voelcker Bird Book Fund.
325. Maddox JD & Bollinger EK. 2000 Male dickcissels feed nestlings in east-central Illinois. *Wilson Bull.* **112**, 153-5.
326. Madge S & Burn H. 1994 *Crows and jays: a guide to the crows, jays and magpies of the world*. London: Christopher Helm.
327. Magrath RD, Leedman AW, Gardner JL, Giannasca A, Nathan AC, et al. 2000 Life in the slow lane: Reproductive life history of the white-browed scrubwren, an Australian endemic. *Auk* **117**, 479-89.
328. Magrath RD & Whittingham LA. 1997 Subordinate males are more likely to help if unrelated to the breeding female in cooperatively breeding white-browed scrubwrens. *Behav. Ecol. Sociobiol.* **41**, 185-92.

329. Male TD, Fancy SG & Ralph CJ. 1998 Red-billed leiothrix. In *Birds of North America: Life Histories for the Twenty-First Century*, (ed. A. Poole, P. Stettenheim & F. Gill), pp. 1-12. Washington, D.C.: American Ornithologist's Union and Academy of Natural Sciences, Philadelphia
330. Marchant S. 1960 The breeding of some S.W. Ecuadorian birds. *Ibis* **102**, 349-82, 584-99.
331. Marin AM & Schmitt NJ. 1991 Nests and eggs of some Costa Rican birds. *Wilson Bull.* **103**, 506-9.
332. Marra PP. 1990 Nest, eggs, and young of the green-and-gold tanager, with notes on timing of breeding. *Wilson Bull.* **102**, 346-8.
333. Martin JW & Carlson BA. 1998 Sage sparrow. In *Birds of North America: Life Histories for the Twenty-First Century*, (ed. A. Poole, P. Stettenheim & F. Gill), pp. 1-20. Washington, D.C.: American Ornithologist's Union and Academy of Natural Sciences, Philadelphia
334. Martin JW & Parrish JR. 2000 Lark sparrow. In *Birds of North America: Life Histories for the Twenty-First Century*, (ed. A. Poole, P. Stettenheim & F. Gill), pp. 1-20. Washington, D.C.: American Ornithologist's Union and Academy of Natural Sciences, Philadelphia
335. Martin TE, Martin PR, Olson CR, Heidinger BJ & Fontaine JJ. 2000 Parental care and clutch sizes in North and South American birds. *Science* **287**, 1482-5.
336. McCallum DA, Grundel R & Dahlsten DL. 1999 Mountain chickadee. In *Birds of North America: Life Histories for the Twenty-First Century*, (ed. A. Poole, P. Stettenheim & F. Gill), pp. 1-27. Washington, D.C.: American Ornithologist's Union and Academy of Natural Sciences, Philadelphia
337. McGowan KJ. 2001 Fish crow: *Corvus ossifragus*. In *Birds of North America: Life Histories for the Twenty-First Century*, (ed. A. Poole, P. Stettenheim & F. Gill), pp. 1-27. Washington, D.C.: American Ornithologist's Union and Academy of Natural Sciences, Philadelphia
338. Middleton ALA. 1993 American goldfinch. In *Birds of North America: Life Histories for the Twenty-First Century*, (ed. A. Poole, P. Stettenheim & F. Gill), pp. 1-24. Washington, D.C.: American Ornithologist's Union and Academy of Natural Sciences, Philadelphia
339. Middleton ALA. 1998 Chipping sparrow. In *Birds of North America: Life Histories for the Twenty-First Century*, (ed. A. Poole, P. Stettenheim & F. Gill), pp. 1-32. Washington, D.C.: American Ornithologist's Union and Academy of Natural Sciences, Philadelphia
340. Milder SL & Sreiber RW. 1982 A note on the mating behaviour of *Acrocephalus aequinoctialis*. *Bull. Brit. Ornithol. Club* **102**, 20-2.
341. Mizuta T. 1998 The breeding biology of the black paradise flycatcher *Terpsiphone atrocaudata*. *Jap. J. Ornithol.* **47**, 25-8.
342. Mizuta T, Nakamura M & Yamagishi S. 2001 Breeding ecology of Van Dam's vanga *Xenopirostris damii*, an endemic species in Madagascar. *J. Yamashina Inst. Ornithol.* **33**, 15-24.
343. Mizuta T & Yamagishi S. 1998 Breeding biology of monogamous Asian paradise flycatcher *Terpsiphone paradisi* (Aves: Monarchinae): a special reference to colour dimorphism and exaggerated long tails in male. *Raffles Bull. Zool.* **46**, 101-12.
344. Moermond TC. 1981 Cooperative feeding, defense of young, and flocking in the black-faced grosbeak. *Condor* **83**, 82-3.
345. Moffatt JD, Whitmore MJ & Date EM. 1983 Communal breeding by striped honeyeaters. *Emu* **83**, 202-3.
346. Moraes VS & Krul R. 1997 Notes on the black-backed tanager *Tangara peruviana* (Desmarest, 1806). *Bull. Brit. Ornithol. Club* **117**, 316-8.
347. Morel MY & Morel GJ. 1973 Premiers observations sur la reproduction du Moineau doré *Passer luteus* (Licht) en zone semi-aride de l'ouest africain. *Ois. Rev. Franc. Ornithol.* **43**, 97-118.
348. Morin MP. 1992 The breeding biology of an endangered Hawaiian honeycreeper, the Laysan finch. *Condor* **94**, 646-67.
349. Morin MP, Conant S & Conant P. 1997 Laysan and Nihoa millerbird. In *Birds of North America: Life Histories for the Twenty-First Century*, (ed. A. Poole, P. Stettenheim & F. Gill), pp. 1-20. Washington, D.C.: American Ornithologist's Union and Academy of Natural Sciences, Philadelphia
350. Morioka H. 1992 Relationships of the Ogasawara Islands grosbeak *Chaunoproctus ferreorostris* (Aves, Fringillidae). *Bull. Nat. Sci. Mus. A (Zool.)* **18**, 45-9.
351. Mowbray TB. 1997 Swamp sparrow. In *Birds of North America: Life Histories for the Twenty-First Century*, (ed. A. Poole, P. Stettenheim & F. Gill), pp. 1-24. Washington, D.C.: American Ornithologist's Union and Academy of Natural Sciences, Philadelphia
352. Mowbray TB. 1999 Scarlet tanager. In *Birds of North America: Life Histories for the Twenty-First Century*, (ed. A. Poole, P. Stettenheim & F. Gill), pp. 1-28. Washington, D.C.: American Ornithologist's Union and Academy of Natural Sciences, Philadelphia
353. Nagata H. 1988 An example of facultative polygyny in Middendorf's grasshopper warbler (*Locustella ochotensis*). *Ecol. Res.* **3**, 57-60.
354. Nakamura H. 1991 Dispersal of the oriental greenfinch *Carduelis sinica* from communal display areas and social organization in breeding season (Aves: Fringillidae). *J. Yamashina Inst. Ornithol.* **22**, 9-55.
355. Nakamura M. 1998 Multiple mating and cooperative breeding in polygynandrous alpine accentors. I. Competition among females. *Anim. Behav.* **55**, 257-73.
356. Nakamura M. 1998 Multiple mating and cooperative breeding in polygynandrous alpine accentors. II. Male mating tactics. *Anim. Behav.* **55**, 275-87.
357. Nakamura M, Yamagishi S & Nishiumi I. 2001 Cooperative breeding of the white-headed vanga *Leptopterus viridis*, an endemic species in Madagascar. *J. Yamashina Inst. Ornithol.* **33**, 1-14.
358. Nakamura S. 1985 Clutch size and breeding success of the Japanese wagtail *Motacilla grandis*, with a special reference to its habitat and mating system. *J. Yamashina Inst. Ornithol.* **17**, 84-104.
359. Naugler CT. 1993 American tree sparrow. In *Birds of North America: Life Histories for the Twenty-First Century*, (ed. A. Poole, P. Stettenheim & F. Gill), pp. 1-12. Washington, D.C.: American Ornithologist's Union and Academy of Natural Sciences, Philadelphia

360. Nemeth E & Bennun L. 2000 Distribution, habitat selection and behaviour of the east coast akalat *Sheppardia gunningi sokokensis* in Kenya and Tanzania. *Bird Cons. Int.* **10**, 115-30.
361. Nethersole-Thompson D. 1975 *Pine crossbills: a scottish contribution*. London: T & AD Poyser.
362. Newman J. 2000 White-naped seedeater *Dolospingus fringilloides*. *Cotinga* **14**, 111-2.
363. Nicholls JA, Double MC, Rowell DM & Magrath RD. 2000 The evolution of cooperative and pair breeding in thornbills *Acanthiza* (Pardalotidae). *J. Avian Biol.* **31**, 165-76.
364. Nocedal J & Ficken MS. 1998 Helpers in the bridled titmouse. *Southwest. Nat.* **43**, 279-82.
365. Nolan V, Jr., Ketterson ED & Buerkle CA. 1999 Prairie warbler. In *Birds of North America: Life Histories for the Twenty-First Century*, (ed. A. Poole, P. Stettenheim & F. Gill), pp. 1-27. Washington, D.C.: American Ornithologist's Union and Academy of Natural Sciences, Philadelphia
366. Norment CJ, Hendricks P & Santonocito R. 1998 Golden-crowned sparrow. In *Birds of North America: Life Histories for the Twenty-First Century*, (ed. A. Poole, P. Stettenheim & F. Gill), pp. 1-20. Washington, D.C.: American Ornithologist's Union and Academy of Natural Sciences, Philadelphia
367. Norment CJ & Shackleton SA. 1993 Harris' sparrow. In *Birds of North America: Life Histories for the Twenty-First Century*, (ed. A. Poole, P. Stettenheim & F. Gill), pp. 1-20. Washington, D.C.: American Ornithologist's Union and Academy of Natural Sciences, Philadelphia
368. Noske RA. 1983 Communal behaviour of brown-headed honeyeaters. *Emu* **83**, 38-41.
369. Noske RA. 1992 The status and ecology of the white-throated grasswren *Amytornis woodwardi*. *Emu* **92**, 39-51.
370. Noske RA. 1999 Notes on the breeding biology of the tropical mangrove-dwelling yellow white-eye *Zosterops luteus*. *Aust. Bird Watcher* **18**, 3-7.
371. Noske RA. 2001 The breeding biology of the mangrove gerygone, *Gerygone laevigaster*, in the Darwin region, with notes on brood parasitism by the little bronze-cuckoo, *Chrysococcyx minutillus*. *Emu* **101**, 129-35.
372. Ohara H & Yamagishi S. 1984 The first record of helping at the nest in the short-tailed bush warbler *Cettia squameiceps*. *Tori* **33**, 39-41.
373. Ohara H & Yamagishi S. 1985 A helper at the nest of the short-tailed bush warbler *Cettia squameiceps*. *J. Yamashina Inst. Ornithol.* **17**, 67-73.
374. Oliveras de Ita A, Gomez de Silva H & Grosselet M. 2001 Population dynamics and natural history of the Sierra Madre sparrow *Xenospiza baileyi* at La Cima, Mexico. *Cotinga* **15**, 43-7.
375. Olson SL. 1984 The last St. Kitts bullfinch *Loxigilla portoricensis grandis* (Emberizinae) and the extinction of its race. *Bull. Brit. Ornithol. Club* **104**, 121-3.
376. Olson SL. 1994 The endemic vireo of Fernando de Noronha (*Vireo gracilirostris*). *Wilson Bull.* **106**, 1-17.
377. Olson SL. 1999 Kona grosbeak, *Chloridops kona*, greater koa-finch, *Rhodacanthis palmeri*, lesser koa-finch, *Rhodacanthis flaviceps*. In *Birds of North America: Life Histories for the Twenty-First Century*, (ed. A. Poole, P. Stettenheim & F. Gill), pp. 1-20. Washington, D.C.: American Ornithologist's Union and Academy of Natural Sciences, Philadelphia
378. Orians GH, Erickmann L & Schultz JC. 1977 Nesting and other habits of the Bolivian blackbird (*Oreopsar bolivianus*). *Condor* **79**, 250-6.
379. Orians GH, Orians CE & Orians KJ. 1977 Helpers at the nest in some Argentine blackbirds. In *Evolutionary Ecology*, (ed. B. Stonehouse & C.M. Perrins), pp. 137-51. Baltimore: University Park Press
380. Osborn SAH. 2000 Itinerant breeding and mate switching by an American dipper. *Wilson Bull.* **112**, 539-41.
381. Paredes M, Weir E & Gil K. 2001 Reproduction of the bird *Mimus gilvus* (Passeriformes: Mimidae) in Maracaibo, Venezuela. *Rev. Biol. Trop.* **49**, 1143-6.
382. Parker ISC. 1997 Co-operative breeding in two African warblers. *Scopus* **19**, 117.
383. Parkes DA & Masterson ANB. 1998 The biology of Livingstone's flycatcher. *Honeyguide* **44**, 69-78.
384. Payne RB. 1982 Species limits in the indigobirds (Ploceidae, *Vidua*) of west Africa: mouth mimicry, song mimicry and description of new species. *Misc. Publ. Mus. Zool. Univ. Mich.* **162**, 1-96.
385. Payne RB. 1992 Indigo bunting. In *Birds of North America: Life Histories for the Twenty-First Century*, (ed. A. Poole, P. Stettenheim & F. Gill), pp. 1-24. Washington, D.C.: American Ornithologist's Union and Academy of Natural Sciences, Philadelphia
386. Payne RB & Payne LL. 1994 Song mimicry and species associations of west African indigobirds *Vidua* with quail-finch *Ortygospiza atricollis*, goldbreast *Amandava subflava* and brown twinspot *Clytospiza monteiri*. *Ibis* **136**, 291-304.
387. Payne RB, Payne LL & Nhlane MED. 1992 Song mimicry and species status of the green widowfinch *Vidua codringtoni*. *Ostrich* **63**, 86-97.
388. Payne RB, Payne LL & Woods JL. 1998 Song learning in brood-parasitic indigobirds *Vidua chalybeata*: song mimicry of the host species. *Anim. Behav.* **55**, 1537-53.
389. Payne RB, Woods JL, Siddall ME & Parr CS. 2000 Randomization analyses: mimicry, geographic variation and cultural evolution of song in brood-parasitic straw-tailed whydahs, *Vidua fischeri*. *Ethology* **106**, 261-82.
390. Paynter RA, Jr. 1978 Biology and evolution of the avian genus *Atlapetes* (Emberizinae). *Bull. Mus. Comp. Zool.* **148**, 323-69.
391. Peris SJ. 1997 Notes on the breeding biology and population density of the Tucuman mountain-finch (*Poospiza baeri*; Aves: Emberizidae) in Argentina, with description of nest and eggs. *Rev. Chil. Hist. Nat.* **70**, 221-4.
392. Peterson AT & Burt DB. 1992 Phylogenetic history of social evolution and habitat use in the *Aphelocoma* jays. *Anim. Behav.* **44**, 859-66.
393. Pinxten R, Eens M & Verheyen RF. 1994 Communal breeding in the European starling: evidence from DNA fingerprinting. *Auk* **111**, 482-6.
394. Post W & Greenlaw JS. 1994 Seaside sparrow. In *Birds of North America: Life Histories for the Twenty-First Century*, (ed. A. Poole, P. Stettenheim & F. Gill), pp. 1-28. Washington, D.C.: American Ornithologist's Union and Academy of Natural Sciences, Philadelphia

395. Power HW & Lombardo MP. 1996 Mountain bluebird. In *Birds of North America: Life Histories for the Twenty-First Century*, (ed. A. Poole, P. Stettenheim & F. Gill), pp. 1-24. Washington, D.C.: American Ornithologist's Union and Academy of Natural Sciences, Philadelphia
396. Pratt TK, Fancy SG & Ralph CJ. 2001 'Akiapola'au: *Hemignathus munroi*. Nukupu'u: *Hemignathus lucidus*. In *Birds of North America: Life Histories for the Twenty-First Century*, (ed. A. Poole, P. Stettenheim & F. Gill), pp. 1-27. Washington, D.C.: American Ornithologist's Union and Academy of Natural Sciences, Philadelphia
397. Pratt TK, Kepler CB & Casey TLC. 1997 Po'ouli. In *Birds of North America: Life Histories for the Twenty-First Century*, (ed. A. Poole, P. Stettenheim & F. Gill), pp. 1-16. Washington, D.C.: American Ornithologist's Union and Academy of Natural Sciences, Philadelphia
398. Price JJ & Lanyon SM. 2002 A robust phylogeny of the oropendolas: polyphyly revealed by mitochondrial sequence data. *Auk* **119**, 335-48.
399. Price T & Jandar N. 1992 Breeding of eight sympatric species of *Phylloscopus* warblers in Kashmir. *J. Bomb. Nat. Hist. Soc.* **88**, 242-55.
400. Price T, Millington S & Grant P. 1983 Helping at the nest in Darwin's finches as misdirected parental care. *Auk* **100**, 192-4.
401. Proudfoot GA, Sherry DA & Johnson S. 2000 Cactus wren. In *Birds of North America: Life Histories for the Twenty-First Century*, (ed. A. Poole, P. Stettenheim & F. Gill), pp. 1-24. Washington, D.C.: American Ornithologist's Union and Academy of Natural Sciences, Philadelphia
402. Prys-Jones R. 1979 The ecology and conservation of the Aldabra brush warbler *Nesillas aldebranus*. *Phil. Trans. R. Soc. Lond.* **286**, 211-34.
403. Putnam MS. 1996 Aspects of the breeding biology of Pollen's vanga (*Xenopirostris polleni*) in southeastern Madagascar. *Auk* **113**, 233-6.
404. Pyle P & Engbring J. 1988 First described nest and nest site activity of the truk greater white-eye (*Rukia ruki*). *Micronesica* **21**, 281-3.
405. Radicke FL. 1985 Der indische brillenvogel *Zosterops palebrosus*. *Neue Brehm-Buecherei* **672**, 1-119.
406. Raffaele H, Wiley J, Garrido O, Keith A & Raffaele J. 1998 *Birds of the West Indies*. London: Christopher Helm.
407. Ragusa-Netto J. 1996 Nestling development, size and juvenile survival in *Donacobius atricapillus* (Passeriformes: Troglodytidae). *Ararajuba* **4**, 81-5.
408. Ragusa-Netto J. 2001 Sentinels in *Saltator atricollis* (Passeriformes: Emberizidae). *Rev. Brasil. Biol.* **61**, 317-22.
409. Rakotomanana H, Nakamura M & Yamagishi S. 2001 Breeding ecology of the endemic hook-billed vanga, *Vanga curvirostris*, in Madagascar. *J. Yamashina Inst. Ornithol.* **33**, 25-35.
410. Rane U. 1984 Unusual communal nest-feeding in southern small minivet *Pericrocotus cinnamomeus cinnamomeus* Linne. *J. Bomb. Nat. Hist. Soc.* **81**, 473-4.
411. Reynolds MD. 1995 Yellow-billed magpie. In *Birds of North America: Life Histories for the Twenty-First Century*, (ed. A. Poole, P. Stettenheim & F. Gill), pp. 1-20. Washington, D.C.: American Ornithologist's Union and Academy of Natural Sciences, Philadelphia
412. Reynolds TD, Rich TD & Stephens DA. 1999 Sage thrasher. In *Birds of North America: Life Histories for the Twenty-First Century*, (ed. A. Poole, P. Stettenheim & F. Gill), pp. 1-23. Washington, D.C.: American Ornithologist's Union and Academy of Natural Sciences, Philadelphia
413. Ridgley RS & Tudor G. 1989 *The birds of South America. Vol. 1. The oscine passerines*. Oxford: Oxford University Press.
414. Rimmer CC, McFarland KP, Ellison WG & Goetz JE. 2001 Bicknell's thrush: *Catharus bicknelli*. In *Birds of North America: Life Histories for the Twenty-First Century*, (ed. A. Poole, P. Stettenheim & F. Gill), pp. 1-27. Washington, D.C.: American Ornithologist's Union and Academy of Natural Sciences, Philadelphia
415. Rising JD & Flood NJ. 1998 Baltimore oriole *Icterus galbula*. In *Birds of North America: Life Histories for the Twenty-First Century*, (ed. A. Poole, P. Stettenheim & F. Gill), pp. 1-32. Washington, D.C.: American Ornithologist's Union and Academy of Natural Sciences, Philadelphia
416. Rising JD & Williams PA. 1999 Bullock's oriole *Icterus bullockii*. In *Birds of North America: Life Histories for the Twenty-First Century*, (ed. A. Poole, P. Stettenheim & F. Gill), pp. 1-19. Washington, D.C.: American Ornithologist's Union and Academy of Natural Sciences, Philadelphia
417. Robbins MB & Dale BC. 1999 Sprague's pipit. In *Birds of North America: Life Histories for the Twenty-First Century*, (ed. A. Poole, P. Stettenheim & F. Gill), pp. 1-16. Washington, D.C.: American Ornithologist's Union and Academy of Natural Sciences, Philadelphia
418. Robbins MB & Glenn GS. 1988 First description of the nest and eggs of the moss-backed tanager (*Buthraupis [Bangsia] edwardsi*). *Condor* **90**, 947-8.
419. Roberts GE, Male TD & Conant S. 1998 White-rumped shama *Copsychus malabaricus*. In *Birds of North America: Life Histories for the Twenty-First Century*, (ed. A. Poole, P. Stettenheim & F. Gill), pp. 1-12. Washington, D.C.: American Ornithologist's Union and Academy of Natural Sciences, Philadelphia
420. Roberts TJ. 1992 *The birds of Pakistan. Volume 2. Passeriformes, pittas to buntings*. Oxford: Oxford University Press.
421. Robertson BC, Degnan SM, Kikkawa J & Moritz CC. 2001 Genetic monogamy in the absence of paternity guards: the Capricorn silvereye, *Zosterops lateralis chlorocephalus*, on Heron Island. *Behav. Ecol.* **12**, 666-73.
422. Robertson CJR. 1985 *Complete book of New Zealand birds*. Sydney: Reader's Digest.
423. Robertson RJ, Stutchbury BJ & Cohen RR. 1992 Tree swallow. In *Birds of North America: Life Histories for the Twenty-First Century*, (ed. A. Poole, P. Stettenheim & F. Gill), pp. 1-28. Washington, D.C.: American Ornithologist's Union and Academy of Natural Sciences, Philadelphia
424. Robinson WD. 1996 Summer tanager. In *Birds of North America: Life Histories for the Twenty-First Century*, (ed. A. Poole, P. Stettenheim & F. Gill), pp. 1-24. Washington, D.C.: American Ornithologist's Union and Academy of Natural Sciences, Philadelphia

- 425 . Robson C. 2000 *A field guide to the birds of south-east Asia*. London: New Holland.
- 426 . Rodewald PG & James RD. 1996 Yellow-throated vireo. In *Birds of North America: Life Histories for the Twenty-First Century*, (ed. A. Poole, P. Stettenheim & F. Gill), pp. 1-20. Washington, D.C.: American Ornithologist's Union and Academy of Natural Sciences, Philadelphia
- 427 . Rotenberry JT, Patten MA & Preston KL. 1999 Brewer's sparrow. In *Birds of North America: Life Histories for the Twenty-First Century*, (ed. A. Poole, P. Stettenheim & F. Gill), pp. 1-24. Washington, D.C.: American Ornithologist's Union and Academy of Natural Sciences, Philadelphia
- 428 . Rowley I. 1976 Co-operative breeding in Australian birds. In *Proceedings of the 16th International Ornithological Congress*, (ed. H.J. Frith & J.H. Calaby), pp. 657-66. Canberra: Australian Academy of Science
- 429 . Rowley I. 1978 Communal activities among white-winged choughs *Corcorax melanorhamphos*. *Ibis* **120**, 178-97.
- 430 . Rowley I. 1999 Co-operative breeding by black-faced woodswallows *Artamus cinereus*. *Corella* **23**, 63-6.
- 431 . Rowley I. 2000 Cooperative breeding by dusky woodswallows. *Canberra Bird Notes* **25**, 49-58.
- 432 . Rowley I & Russell E. 1997 *Fairy-wrens and Grasswrens: Maluridae*. Oxford: Oxford University Press.
- 433 . Safford R. 2000 The Mauritius cuckoo-shrike *Coracina typica*: from egg to adult. *Bull. Afr. Bird Club* **7**, 29-30.
- 434 . Safford RJ. 1997 The annual cycle and breeding behaviour of the Mauritius fody *Foudia rubra*. *Ostrich* **68**, 58-67.
- 435 . Salaman PGW, Davalos L & Kirwan GM. 1998 The first breeding records of white-rimmed brush-finch *Atlapetes leucopis* with ecological notes. *Cotinga* **9**, 24-6.
- 436 . Sappington JN. 1977 Breeding biology of house sparrows in north Mississippi. *Wilson Bull.* **89**, 300-9.
- 437 . Sargent S. 1993 Nesting biology of the yellow-throated euphonia: large clutch size in a Neotropical frugivore. *Wilson Bull.* **105**, 285-300.
- 438 . Saul EK, Robertson HA & Tiraa A. 1998 Breeding biology of the kakerori (*Pomarea dimidiata*) on Rarotonga, Cook Islands. *Notornis* **45**, 255-69.
- 439 . Savalli UM. 1995 Morphology, territoriality and mating system of the pintailed whydah *Vidua macroura*. *Ostrich* **66**, 129-34.
- 440 . Savalli UM. 1997 The role of male territories in the mating system of the yellow-shouldered widowbird *Euplectes macrourus*. *Ibis* **139**, 374-8.
- 441 . Scharf WC & Kren J. 1996 Orchard oriole. In *Birds of North America: Life Histories for the Twenty-First Century*, (ed. A. Poole, P. Stettenheim & F. Gill), pp. 1-24. Washington, D.C.: American Ornithologist's Union and Academy of Natural Sciences, Philadelphia
- 442 . Schleicher B, Hoi H, Valera F & Hoi-Leitner M. 1997 The importance of different paternity guards in the polygynandrous penduline tit (*Remiz pendulinus*). *Behaviour* **134**, 941-59.
- 443 . Schulenberg TS & Gill FB. 1987 First description of the nest of the olive finch, *Lysurus castaneiceps*. *Condor* **89**, 673-4.
- 444 . Severinghaus LL. 1987 Flocking and cooperative breeding of Formosan blue magpie. *Bull. Inst. Zool. Academica Sinica* **26**, 27-37.
- 445 . Shane TG. 2000 Lark bunting: *Calamospiza melanocorys*. In *Birds of North America: Life Histories for the Twenty-First Century*, (ed. A. Poole, P. Stettenheim & F. Gill), pp. 1-28. Washington, D.C.: American Ornithologist's Union and Academy of Natural Sciences, Philadelphia
- 446 . Sheldon FH, Moyle RG & Kennard J. 2001 Ornithology of Sabah: history, gazetteer, annotated checklist, and bibliography. *Ornithol. Monogr.* **52**, 1-285.
- 447 . Sheppard JM. 1996 Le Conte's thrasher (*Toxostoma lecontei*). In *Birds of North America: Life Histories for the Twenty-First Century*, (ed. A. Poole, P. Stettenheim & F. Gill), pp. 1-24. Washington, D.C.: American Ornithologist's Union and Academy of Natural Sciences, Philadelphia
- 448 . Shirihai H, Gargallo G & Helbig AJ. 2001 *Sylvia warblers: identification, taxonomy and phylogeny of the genus Sylvia*. Oxford: Christopher Helm.
- 449 . Sibley CG & Ahlquist JE. 1990 *Phylogeny and classification of birds: a study in molecular evolution*. New Haven & London: Yale University Press.
- 450 . Sibley CG & Monroe BL. 1993 *A supplement to distribution and taxonomy of birds of the world*. New Haven: Yale University Press.
- 451 . Simon JC, Pratt TK, Berlin KE & Kowalsky JR. 2000 Reproductive ecology of the Maui parrotbill. *Wilson Bull.* **112**, 482-90.
- 452 . Skerrett A, Bullock I & Disley T. 2001 *Birds of the Seychelles*. Princeton: Princeton University Press.
- 453 . Skutch AF. 1954 *Life histories of Central American Birds I Families Fringillidae, Thraupidae, Icteridae, Parulidae and Corebidae*. Berkeley: Cooper Ornithological Society.
- 454 . Skutch AF. 1960 *Life histories of Central American Birds II Families Vireonidae, Sylviidae, Turdidae, Troglodytidae, Paridae, Corvidae, Hirundinidae and Tyrannidae*. Berkeley: Cooper Ornithological Society.
- 455 . Skutch AF. 1987 *Helpers at birds' nests: a worldwide survey of cooperative breeding and related behaviour*. Iowa City: Iowa University Press.
- 456 . Slikas B, Sheldon FH & Gill FB. 1996 Phylogeny of titmice (Paridae). 1. Estimate of relationships among subgenera based on DNA-DNA hybridization. *J. Avian Biol.* **27**, 70-82.
- 457 . Sloane SA. 2001 Bushtit: *Psaltriparus minimus*. In *Birds of North America: Life Histories for the Twenty-First Century*, (ed. A. Poole, P. Stettenheim & F. Gill), pp. 1-19. Washington, D.C.: American Ornithologist's Union and Academy of Natural Sciences, Philadelphia
- 458 . Smith SM. 1993 Black-capped chickadee. In *Birds of North America: Life Histories for the Twenty-First Century*, (ed. A. Poole, P. Stettenheim & F. Gill), pp. 1-20. Washington, D.C.: American Ornithologist's Union and Academy of Natural Sciences, Philadelphia
- 459 . Smythies BE & Davidson GWH. 1999 *Birds of Borneo 4th ed*. Kinabalu: Natural History Publications.
- 460 . Snetsinger TJ, Reynolds MH & Herrmann CM. 1998 'O'u. Lana'i hookbill. In *Birds of North America: Life Histories for the Twenty-First Century*, (ed. A. Poole, P. Stettenheim & F. Gill), pp. 1-20. Washington, D.C.: American Ornithologist's Union and Academy of Natural Sciences, Philadelphia

461. Snetsinger TJ, Wakelee KM & Fancy SG. 1999 Puaiohi. In *Birds of North America: Life Histories for the Twenty-First Century*, (ed. A. Poole, P. Stettenheim & F. Gill), pp. 1-19. Washington, D.C.: American Ornithologist's Union and Academy of Natural Sciences, Philadelphia
462. Sorenson MD & Payne RB. 2001 A single ancient origin of brood parasitism in African finches: Implications for host-parasite coevolution. *Evolution* **55**, 2550-67.
463. Springer MS, Higuchi H, Ueda K, Minton J & Sibley CG. 1995 Molecular evidence that the Bonin Islands 'honeyeater' is a white-eye. *J. Yamashina Inst. Ornithol.* **27**, 66-77.
464. Stewart BG, Carter WA & Tyler JD. 1988 Third known nest of the slaty vireo, *Vireo brevipennis* (Vireonidae), in Colima, Mexico. *Southwestern Nat.* **33**, 252-3.
465. Steyn P. 1988 Cooperative breeding in the spike-headed lark. *Ostrich* **59**, 182.
466. Stiles FG & Skutch AF. 1989 *A guide to the birds of Costa Rica*. Ithaca: Cornell University Press.
467. Stinson CM & Stinson DW. 1994 Nest sites, clutch size and incubation behavior in the golden white-eye. *J. Field Ornithol.* **65**, 65-9.
468. Stjernstedt R & Aspinwall DR. 1979 The nest and eggs of the bar-winged weaver *Ploceus angolensis*. *Bull. Brit. Ornithol. Club* **99**, 138-40.
469. Strahan R. 1994 *Cuckoos, nightbirds and kingfishers of Australia*. Sydney: Angus & Robertson.
470. Strahan R. 1996 *Finches, bowerbirds and other passerines*. Sydney: Angus & Robertson.
471. Strewé R. 2001 First breeding records of black-chinned mountain-tanager *Anisognathus notabilis* and first nesting records in the wild of blue-winged mountain-tanager *A. flavinucha* with ecological notes. *Cotinga* **15**, 38-42.
472. Studer A & Viellard J. 1988 Premieres donnees etho-ecologiques sur l'icteride bresilien *Curaeus forbesi* (Sclater, 1886) (Aves, Passeriformes). *Rev Suisse Zool.* **95**, 1063-77.
473. Sturmbauer C, Berger B, Dallinger R & Föger M. 1998 Mitochondrial phylogeny of the genus *Regulus* and implications on the evolution of breeding behavior in sylvioid songbirds. *Mol. Phyl. Evol.* **10**, 144-9.
474. Sullivan KA. 1999 Yellow-eyed junco. In *Birds of North America: Life Histories for the Twenty-First Century*, (ed. A. Poole, P. Stettenheim & F. Gill), pp. 1-23. Washington, D.C.: American Ornithologist's Union and Academy of Natural Sciences, Philadelphia
475. Summers-Smith JD. 1988 *The sparrows: a study of the genus Passer*. Calton: Poyser.
476. Sykes PW, Jr., Kepler AK, Kepler CB & Scott JM. 2000 Kaua'i O-o: *Moho braccatus*, Hawai'i O-o: *Moho nobilis*, O'ahu O-o: *Moho apicalis*, Bishop's O-o: *Moho bishopi*, Kioae: *Chaetoptila angustipluma*. In *Birds of North America: Life Histories for the Twenty-First Century*, (ed. A. Poole, P. Stettenheim & F. Gill), pp. 1-32. Washington, D.C.: American Ornithologist's Union and Academy of Natural Sciences, Philadelphia
477. Tamura M & Ueda K. 2001 Breeding ecology of Siberian blue robins. *Strix* **19**, 11-20.
478. Tarof SA & Stutchbury BJ. 1996 A case of cooperative breeding in the hooded warbler. *Wilson Bull.* **108**, 382-4.
479. Tarvin KA & Woolfenden GE. 1999 Blue jay. In *Birds of North America: Life Histories for the Twenty-First Century*, (ed. A. Poole, P. Stettenheim & F. Gill), pp. 1-32. Washington, D.C.: American Ornithologist's Union and Academy of Natural Sciences, Philadelphia
480. Tello JG. 1999 First description of nest and nestlings of white-winged shrike-tanager *Lanio versicolor*. *Cotinga* **11**, 81-2.
481. Tenney CR. 1997 Black-chinned sparrow. In *Birds of North America: Life Histories for the Twenty-First Century*, (ed. A. Poole, P. Stettenheim & F. Gill), pp. 1-20. Washington, D.C.: American Ornithologist's Union and Academy of Natural Sciences, Philadelphia
482. Thangamani A, Paramanandham K & Johnsingh AJT. 1981 'Helpers' among the black drongo (*Dicrurus adsimilis*). *J. Bomb. Nat. Hist. Soc.* **78**, 602-3.
483. Thibault J-C & Meyer J-Y. 2001 Contemporary extinctions and population declines of the monarchs (*Pomarea* spp.) in French Polynesia, South Pacific. *Oryx* **35**, 73-80.
484. Thiollay J-M & Probst J-M. 1999 Ecology and conservation of a small insular bird population, the Reunion cuckoo-shrike *Coracina newtoni*. *Biol. Cons.* **87**, 191-200.
485. Thompson HS. 1998 White-necked picathartes *Picathartes gymnocephalus*: its ecology and conservation. *RSPB Cons. Review* **12**, 93-6.
486. Thorstrom R & Rene de Roland L-A. 2001 First nest descriptions, nesting biology and food habits for Bernier's vanga, *Oriolia bernieri*, in Madagascar. *Ostrich* **72**, 165-8.
487. Tobias JA & Williams RSR. 1996 Notes on the behavior of the masked saltator in southern Ecuador. *Auk* **113**, 942-4.
488. Trail PW & Baptista LF. 1988 The behavior, status, and relationships of the endemic St. Lucia black finch. *Nat. Geog. Res.* **5**, 82-97.
489. Turner A & Rose C. 1989 *A handbook to the swallows and martins of the world*. London: Christopher Helm.
490. Tweit RC. 1996 Curve-billed thrasher (*Toxostoma curvirostre*). In *Birds of North America: Life Histories for the Twenty-First Century*, (ed. A. Poole, P. Stettenheim & F. Gill), pp. 1-20. Washington, D.C.: American Ornithologist's Union and Academy of Natural Sciences, Philadelphia
491. Tweit RC. 1997 Long-billed thrasher (*Toxostoma longirostre*). In *Birds of North America: Life Histories for the Twenty-First Century*, (ed. A. Poole, P. Stettenheim & F. Gill), pp. 1-12. Washington, D.C.: American Ornithologist's Union and Academy of Natural Sciences, Philadelphia
492. Tweit RC & Finch DM. 1994 Abert's towhee. In *Birds of North America: Life Histories for the Twenty-First Century*, (ed. A. Poole, P. Stettenheim & F. Gill), pp. 1-20. Washington, D.C.: American Ornithologist's Union and Academy of Natural Sciences, Philadelphia
493. Tweit RC & Thompson CW. 1999 Pyrrhuloxia. In *Birds of North America: Life Histories for the Twenty-First Century*, (ed. A. Poole, P. Stettenheim & F. Gill), pp. 1-20. Washington, D.C.: American Ornithologist's Union and Academy of Natural Sciences, Philadelphia

494. Tye H & Tye A. 1992 First description of the eggs and nest of the golden-winged sparrow *Arremon schlegeli*. *Ornitol. Neotrop.* **3**, 71.
495. Tyson D. 1993 Co-operative feeding of young in two species of honeyeater. *Wingspan* **9**, 29.
496. Urban EK, Fry CH & Keith S, eds. 1997 *The birds of Africa Vol V*. London: Academic Press.
497. Urquhart E & Bowley A. 2002 *Stonechats: a guide to the genus Saxicola*. London: Christopher Helm.
498. van Balen S & Nijman V. 1996 Notes on the breeding of the crested jay *Platylophus galericulatus*. *Bull. Brit. Ornithol. Club* **116**, 173-4.
499. van Riper SG. 2000 Japanese white-eye. In *Birds of North America: Life Histories for the Twenty-First Century*, (ed. A. Poole, P. Stettenheim & F. Gill), pp. 1-16. Washington, D.C.: American Ornithologist's Union and Academy of Natural Sciences, Philadelphia
500. VanderWerf EA. 1998 Breeding biology and territoriality of the Hawaii creeper. *Condor* **100**, 541-5.
501. Vanderwerf EA. 1998 'Elepaio. In *Birds of North America: Life Histories for the Twenty-First Century*, (ed. A. Poole, P. Stettenheim & F. Gill), pp. 1-24. Washington, D.C.: American Ornithologist's Union and Academy of Natural Sciences, Philadelphia
502. Venturini AC, de Paz PR & Kirwan GM. 2002 First breeding data for cherry-throated tanager *Nemosia rourei*. *Cotinga* **17**, 43-5.
503. Verbeek NAM & Butler RW. 1999 Northwestern crow. In *Birds of North America: Life Histories for the Twenty-First Century*, (ed. A. Poole, P. Stettenheim & F. Gill), pp. 1-24. Washington, D.C.: American Ornithologist's Union and Academy of Natural Sciences, Philadelphia
504. Verbeek NAM & Hendricks P. 1994 American pipit. In *Birds of North America: Life Histories for the Twenty-First Century*, (ed. A. Poole, P. Stettenheim & F. Gill), pp. 1-24. Washington, D.C.: American Ornithologist's Union and Academy of Natural Sciences, Philadelphia
505. Vickery PD. 1996 Grasshopper sparrow (*Ammodramus savannarum*). In *Birds of North America: Life Histories for the Twenty-First Century*, (ed. A. Poole, P. Stettenheim & F. Gill), pp. 1-24. Washington, D.C.: American Ornithologist's Union and Academy of Natural Sciences, Philadelphia
506. Wada M, Shimizu T, Kobayashi S, Yatani A, Sandajji Y, et al. 1999 Behavioral and hormonal basis of polygynous breeding in male bush warblers (*Cettia diphone*). *Gen. Comp. Endocrinol.* **116**, 422-32.
507. Waite TA & Strickland D. 1997 Cooperative breeding in gray jays: philopatric offspring provision juvenile siblings. *Condor* **99**, 523-5.
508. Watling D. 2001 *A guide to the birds of Fiji and Western Polynesia, including American Samoa, Niue, Samoa, Tokelau, Tonga, Tuvalu and Wallis & Futuna*. Suva: Environmental Consultants (Fiji).
509. Watt DJ & Willoughby EJ. 1999 Lesser goldfinch. In *Birds of North America: Life Histories for the Twenty-First Century*, (ed. A. Poole, P. Stettenheim & F. Gill), pp. 1-24. Washington, D.C.: American Ornithologist's Union and Academy of Natural Sciences, Philadelphia
510. Webb EA & Bock CE. 1996 Botteri's sparrow. In *Birds of North America: Life Histories for the Twenty-First Century*, (ed. A. Poole, P. Stettenheim & F. Gill), pp. 1-24. Washington, D.C.: American Ornithologist's Union and Academy of Natural Sciences, Philadelphia
511. Webber T & Brown JL. 1994 Natural history of the unicolored jay. *Proc. Western Found. Vert. Zool.* **5**, 135-60.
512. Webster MD. 1999 Verdin. In *Birds of North America: Life Histories for the Twenty-First Century*, (ed. A. Poole, P. Stettenheim & F. Gill), pp. 1-20. Washington, D.C.: American Ornithologist's Union and Academy of Natural Sciences, Philadelphia
513. Wege DC, Howell SNG & Sada AM. 1993 The distribution and status of Worthen's sparrow *Spizella wortheni*: a review. *Bird Cons. Int.* **3**, 211-20.
514. West S. 1995 Cave swallow. In *Birds of North America: Life Histories for the Twenty-First Century*, (ed. A. Poole, P. Stettenheim & F. Gill), pp. 1-20. Washington, D.C.: American Ornithologist's Union and Academy of Natural Sciences, Philadelphia
515. Wetmore A & Swales BH. 1931 The birds of Haiti and the Dominican Republic. *Bull. US Mus. Nat. Hist.* **155**, 1-483.
516. Wheelwright NT & Rising JD. 1993 Savannah sparrow. In *Birds of North America: Life Histories for the Twenty-First Century*, (ed. A. Poole, P. Stettenheim & F. Gill), pp. 1-28. Washington, D.C.: American Ornithologist's Union and Academy of Natural Sciences, Philadelphia
517. Wilkinson R & McLeod W. 1994 Breeding the white-headed (Bohm's) buffalo weaver and the Taveta golden weaver at Chester Zoo. *Avicult. Mag.* **100**, 24-8.
518. Willis EO & Bosso A. 1997 A nest of the cream-bellied gnatcatcher, *Polioptila lactea*. *Ornitol. Neotrop.* **8**, 75-6.
519. Wilson JD. 1992 A probable case of sexually selected infanticide by a male dipper *Cinclus cinclus*. *Ibis* **134**, 188-90.
520. Wilson JD. 1996 The breeding biology and population history of the dipper *Cinclus cinclus* on a Scottish river system. *Bird Study* **43**, 108-18.
521. Winterbottom M, Burke T & Birkhead TR. 2001 The phalloid organ, orgasm and sperm competition in a polygynandrous bird: the red-billed buffalo weaver (*Bubalornis niger*). *Behav. Ecol. Sociobiol.* **50**, 474-82.
522. With KA. 1994 McCown's longspur. In *Birds of North America: Life Histories for the Twenty-First Century*, (ed. A. Poole, P. Stettenheim & F. Gill), pp. 1-24. Washington, D.C.: American Ornithologist's Union and Academy of Natural Sciences, Philadelphia
523. Withgott JH & Smith KG. 1998 Brown-headed nuthatch. In *Birds of North America: Life Histories for the Twenty-First Century*, (ed. A. Poole, P. Stettenheim & F. Gill), pp. 1-24. Washington, D.C.: American Ornithologist's Union and Academy of Natural Sciences, Philadelphia
524. Witmer MC, Mountjoy DJ & Elliot L. 1997 Cedar waxwing *Bombycilla cedrorum*. In *Birds of North America: Life Histories for the Twenty-First Century*, (ed. A. Poole, P. Stettenheim & F. Gill), pp. 1-28. Washington, D.C.: American Ornithologist's Union and Academy of Natural Sciences, Philadelphia
525. Witt CC & Sheldon FH. 1994 A review of the status and distribution of the Bornean bristlehead. *Kukila* **7**, 54-67.



526. Wood B, Madge SC & Waller CS. 1978 Description, moult and measurements of *Montifringilla theresae*. *Bull. Brit. Ornithol. Club* **98**, 55-9.
527. Wood TM, Gallo F & Donahue PK. 1992 Observations at a paradise tanager nest. *Wilson Bull.* **104**, 360-2.
528. Woodall PF. 1980 Communal breeding in the figbird. *Sunbird* **11**, 73-5.
529. Woods RW. 1988 *Guide to the birds of the Falklands*. Shropshire: Nelson.
530. Woodworth BL, Faaborg J & Arendt WJ. 1999 Survival and longevity of the Puerto Rican vireo. *Wilson Bull.* **111**, 376-80.
531. Woodworth BL, Nelson JT, Tweed EJ, Fancy SG, Moore MP, et al. 2001 Breeding productivity and survival of the endangered Hawai'i creeper in a wet forest refuge on Mauna Kea, Hawai'i. *Studies Avian Biol.* **22**, 164-72.
532. Woolfenden GE & Fitzpatrick JW. 1984 *The Florida Scrub Jay: Demography of a cooperative-breeding bird*. Princeton: Princeton University Press.
533. Wootton JT. 1996 Purple finch. In *Birds of North America: Life Histories for the Twenty-First Century*, (ed. A. Poole, P. Stettenheim & F. Gill), pp. 1-20. Washington, D.C.: American Ornithologist's Union and Academy of Natural Sciences, Philadelphia
534. Yamagishi S, Urano E & Eguchi K. 1995 Group composition and contributions to breeding by rufous vangas *Schetba rufa* in Madagascar. *Ibis* **137**, 157-61.
535. Young BE & Zook JR. 1999 Nesting of four poorly-known species on the Caribbean slope of Costa Rica. *Wilson Bull.* **111**, 124-8.
536. Young RA. 1978 Co-operative breeding in the white-crested laughing thrush *Garrulax leucolophus* with notes on its hand rearing at Busch Bird Park, Houston. *Int. Zoo Yearbook* **18**, 106-9.
537. Yu HT & Lin LK. 1985 New record of the group breeding of Formosan yuhinas. *J. Taiwan Mus.* **38**, 47-8.
538. Zacharias VJ. 1997 Possible communal nesting in the Wynaad laughing thrush *Garrulax delesserti delesserti* (Jerdon). *J. Bomb. Nat. Hist. Soc.* **94**, 414.
539. Zahavi A. 1990 Arabian babblers: the quest for social status in a cooperative breeder. In *Cooperative breeding in birds: long-term studies of ecology and behaviour.*, (ed. P.B. Stacey & W.D. Koenig), pp. 103-30. Cambridge: Cambridge University Press

## Electronic Appendix B

Table 3. The characteristics of predominantly cooperative or pair breeding clades of oscine passerines, including the largest genus in the clade. Some fringillid subtaxa are not included in the statistical analysis as they are likely to be both paraphyletic and polyphyletic.

| Family                    | Subgroup<br>Number of: | Number of: |      |         |                  |      |                   | Largest genus        | spp. |
|---------------------------|------------------------|------------|------|---------|------------------|------|-------------------|----------------------|------|
|                           |                        | genera     | spp. | unknown | cooper-<br>ative | pair | %coop-<br>erative |                      |      |
| <i>Cooperative clades</i> |                        |            |      |         |                  |      |                   |                      |      |
| <b>old Australian</b>     |                        |            |      |         |                  |      |                   |                      |      |
| Maluridae                 | Amytornithinae         | 1          | 10   | 2       | 8                | 0    | 100%              | <i>Amytornis</i>     | 10   |
|                           | Malurini               | 3          | 15   | 1       | 14               | 0    | 100%              | <i>Malurus</i>       | 13   |
|                           | Stipiturini            | 1          | 3    | 2       | 1                | 0    | 100%              | <i>Stipiturus</i>    | 3    |
| Pomatostomidae            | Pomatostomidae         | 1          | 5    | 0       | 5                | 0    | 100%              | <i>Pomatostomus</i>  | 5    |
| <b>Corvoidea</b>          |                        |            |      |         |                  |      |                   |                      |      |
| Corvidae                  | Neosittini             | 1          | 2    | 0       | 2                | 0    | 100%              | <i>Daphoenositta</i> | 2    |
|                           | Mohouini               | 1          | 3    | 0       | 3                | 0    | 100%              | <i>Mohoua</i>        | 3    |
|                           | Corcoracinae           | 2          | 2    | 0       | 2                | 0    | 100%              | <i>Corcorax</i>      | 1    |
| <b>Passerida</b>          |                        |            |      |         |                  |      |                   |                      |      |
| Prunellidae               | Prunellinae            | 1          | 13   | 10      | 3                | 0    | 100%              | <i>Prunella</i>      | 13   |
| <i>Pair clades</i>        |                        |            |      |         |                  |      |                   |                      |      |
| <b>old Australian</b>     |                        |            |      |         |                  |      |                   |                      |      |
| Pardalotidae              | Dasyornithinae         | 1          | 3    | 0       | 0                | 3    | 0%                | <i>Dasyornis</i>     | 3    |
| <b>Corvoidea</b>          |                        |            |      |         |                  |      |                   |                      |      |
| Corvidae                  | Callaeatidae           | 3          | 3    | 1       | 0                | 2    | 0%                | <i>Philesturnus</i>  | 1    |
|                           | Dicrurini              | 2          | 24   | 12      | 1                | 11   | 8%                | <i>Dicrurus</i>      | 23   |
|                           | Oriolini               | 8          | 111  | 79      | 3                | 29   | 9%                | <i>Coracina</i>      | 48   |
|                           | Rhipidurini            | 1          | 42   | 29      | 0                | 13   | 0%                | <i>Rhipidura</i>     | 42   |
|                           | Malaconotini           | 8          | 49   | 27      | 0                | 22   | 0%                | <i>Laniarius</i>     | 18   |
| Vireonidae                | Vireonidae             | 4          | 52   | 27      | 0                | 25   | 0%                | <i>Vireo</i>         | 31   |
| <b>Passerida</b>          |                        |            |      |         |                  |      |                   |                      |      |
| Alaudidae                 | Alaudidae              | 19         | 91   | 33      | 2                | 56   | 3%                | <i>Mirafra</i>       | 28   |

|               |                    |    |     |    |   |     |     |                       |                   |     |
|---------------|--------------------|----|-----|----|---|-----|-----|-----------------------|-------------------|-----|
| Bombycillidae | Bombycillini       | 1  | 3   | 0  | 0 | 3   | 0%  | <i>Bombycilla</i>     | 3                 |     |
|               | Ptiloganatini      | 3  | 4   | 0  | 0 | 4   | 0%  | <i>Ptilogonys</i>     | 2                 |     |
| Certhiidae    | Certhiini          | 1  | 6   | 2  | 0 | 4   | 0%  | <i>Certhia</i>        | 6                 |     |
|               | Polioptilinae      | 4  | 15  | 5  | 0 | 10  | 0%  | <i>Polioptila</i>     | 11                |     |
|               | Salpornithini      | 1  | 1   | 0  | 0 | 1   | 0%  | <i>Salpornis</i>      | 1                 |     |
| Cinclidae     | Cinclidae          | 1  | 5   | 1  | 0 | 4   | 0%  | <i>Cinclus</i>        | 5                 |     |
| Fringillidae  | Carduelini         | 20 | 137 | 70 | 0 | 67  | 0%  | <i>Serinus</i>        | 46                |     |
|               | Emberizini         | 32 | 157 | 57 | 8 | 90  | 8%  | <i>Emberiza</i>       | 38                |     |
|               | Fringillini        | 1  | 3   | 1  | 0 | 2   | 0%  | <i>Fringilla</i>      | 3                 |     |
|               | Parulini           | 25 | 115 | 59 | 1 | 55  | 2%  | <i>Dendroica</i>      | 27                |     |
|               | Peucedraminae      | 1  | 1   | 0  | 0 | 1   | 0%  | <i>Peucedramus</i>    | 1                 |     |
| Hirundinidae  | Hirundininae       | 13 | 87  | 30 | 2 | 55  | 4%  | <i>Hirundo</i>        | 39                |     |
|               | Pseudochelidoninae | 1  | 2   | 1  | 0 | 1   | 0%  | <i>Pseudochelidon</i> | 2                 |     |
| Hypocoliidae  | Hypocoliidae       | 1  | 1   | 0  | 0 | 1   | 0%  | <i>Hypocolius</i>     | 1                 |     |
| Irenidae      | Irenidae           | 1  | 2   | 1  | 0 | 1   | 0%  | <i>Irena</i>          | 2                 |     |
| Muscicapidae  | Saxicolini         | 30 | 156 | 50 | 6 | 100 | 6%  | <i>Oenanthe</i>       | 22                |     |
|               | Turdinae           | 21 | 180 | 91 | 4 | 85  | 4%  | <i>Turdus</i>         | 66                |     |
| Nectariniidae | Dicaeini           | 2  | 44  | 38 | 0 | 6   | 0%  | <i>Dicaeum</i>        | 38                |     |
|               | Nectariniini       | 5  | 124 | 69 | 2 | 47  | 4%  | <i>Nectarinia</i>     | 80                |     |
|               | Promeropinae       | 1  | 2   | 0  | 0 | 2   | 0%  | <i>Promerops</i>      | 2                 |     |
| Passeridae    | Estrildinae        | 29 | 140 | 67 | 0 | 73  | 0%  | <i>Lonchura</i>       | 36                |     |
|               | Motacillinae       | 5  | 65  | 25 | 0 | 39  | 0%  | <i>Anthus</i>         | 45                |     |
|               | Passerinae         | 4  | 36  | 13 | 2 | 21  | 9%  | <i>Passer</i>         | 23                |     |
| Regulidae     | Regulidae          | 1  | 6   | 0  | 0 | 6   | 0%  | <i>Regulus</i>        | 6                 |     |
| Sittidae      | Sittinae           | 1  | 24  | 7  | 2 | 15  | 12% | <i>Sitta</i>          | 24                |     |
|               | Tichodrominae      | 1  | 1   | 0  | 0 | 1   | 0%  | <i>Tichodroma</i>     | 1                 |     |
| Sylviidae     | Chamaeini          | 1  | 1   | 0  | 0 | 1   | 0%  | <i>Chamaea</i>        | 1                 |     |
|               | Megalurinae        | 10 | 22  | 13 | 0 | 8   | 0%  | <i>Megalurus</i>      | 7                 |     |
|               | Sylviini           | 1  | 24  | 0  | 1 | 23  | 4%  | <i>Sylvia</i>         | 24                |     |
| Zosteropidae  | Zosteropidae       | 14 | 96  | 80 | 2 | 14  | 13% | <i>Zosterops</i>      | 72                |     |
|               |                    |    |     |    |   |     |     |                       | Total pair        | 878 |
|               |                    |    |     |    |   |     |     |                       | %                 |     |
|               |                    |    |     |    |   |     |     |                       | Total cooperative | 50  |
|               |                    |    |     |    |   |     |     |                       | %                 |     |

Table 4: The characteristics of clades of oscine passerines that exhibit both cooperative and pair breeding, together with the the largest genus in the clade to specialise in cooperative and pair breeding. Statistics report tests for the heterogeneity of the habits among genera. Significant values are in bold. Discrepancies between degrees of freedom and the number of genera reflect the absence of data for some genera. Some fringillid subtaxa are not included in the statistical analysis as they are likely to be both paraphyletic and polyphyletic.

| Family                                                          | Subgroup               | Number of:<br>genera | X <sup>2</sup> | df | P                | spp. | unknown | cooper-<br>ative | pair | % cooper-<br>ative | Social<br>system | Largest genus |
|-----------------------------------------------------------------|------------------------|----------------------|----------------|----|------------------|------|---------|------------------|------|--------------------|------------------|---------------|
| <i>Cooperative breeders distributed evenly between genera</i>   |                        |                      |                |    |                  |      |         |                  |      |                    |                  |               |
| <b>Passerida</b>                                                |                        |                      |                |    |                  |      |         |                  |      |                    |                  |               |
| Cisticolidae                                                    | Cisticolidae           | 17                   | 8.7            | 9  | 0.47             | 120  | 56      | 9                | 55   | 14%                |                  |               |
| <i>Cooperative breeders distributed unevenly between genera</i> |                        |                      |                |    |                  |      |         |                  |      |                    |                  |               |
| <b>old Australian</b>                                           |                        |                      |                |    |                  |      |         |                  |      |                    |                  |               |
| Climacteridae                                                   | Climacteridae          | 2                    | 5.4            | 1  | <b>0.02</b>      | 7    | 1       | 5                | 1    | 83%                | Pair             |               |
|                                                                 | <i>Cormobates</i>      | 2                    | 0              | 0  | 2                |      |         |                  |      |                    | Coop             |               |
|                                                                 | <i>Climacteris</i>     | 5                    | 0              | 0  | 5                |      |         |                  |      |                    |                  |               |
| Meliphagidae                                                    | Meliphagidae           | 42                   | 58.7           | 25 | <b>&lt;0.001</b> | 182  | 116     | 21               | 45   | 32%                | Pair             |               |
|                                                                 | <i>Myzomela</i>        | 30                   | 4              | 19 | 7                |      |         |                  |      |                    | Coop             |               |
|                                                                 | <i>Melithreptus</i>    | 7                    | 3              | 0  | 4                |      |         |                  |      |                    |                  |               |
| Pardalotidae                                                    | Acanthizini            | 4                    | 11.9           | 3  | <b>0.007</b>     | 35   | 9       | 15               | 11   | 58%                | Pair             |               |
|                                                                 | <i>Gerygone</i>        | 19                   | 2              | 5  | 12               |      |         |                  |      |                    | Coop             |               |
|                                                                 | <i>Acanthiza</i>       | 12                   | 0              | 0  | 12               |      |         |                  |      |                    |                  |               |
| Pardalotidae                                                    | Sericornithini         | 10                   | 18.7           | 8  | <b>0.02</b>      | 26   | 9       | 7                | 10   | 41%                | Pair             |               |
|                                                                 | <i>Calamanthus</i>     | 2                    | 0              | 0  | 2                |      |         |                  |      |                    | Coop             |               |
|                                                                 | <i>Sericornis</i>      | 13                   | 0              | 0  | 13               |      |         |                  |      |                    |                  |               |
| <b>Corvoidea</b>                                                |                        |                      |                |    |                  |      |         |                  |      |                    |                  |               |
| Corvidae                                                        | Artamini               | 6                    | 8.6            | 4  | 0.07             | 24   | 7       | 11               | 6    | 65%                | Pair             |               |
|                                                                 | <i>Strepera</i>        | 3                    | 1              | 0  | 2                |      |         |                  |      |                    | Coop             |               |
|                                                                 | <i>Artamus</i>         | 11                   | 7              | 2  | 2                |      |         |                  |      |                    |                  |               |
| Corvidae                                                        | Cinclosomatinae        | 6                    | 7.0            | 2  | <b>0.03</b>      | 15   | 6       | 3                | 6    | 33%                | Pair             |               |
|                                                                 | <i>Psophodes</i>       | 4                    | 0              | 0  | 4                |      |         |                  |      |                    | Coop             |               |
|                                                                 | <i>Cinclosoma</i>      | 5                    | 0              | 0  | 5                |      |         |                  |      |                    |                  |               |
| Corvidae                                                        | Corvini                | 25                   | 71.6           | 22 | <b>&lt;0.001</b> | 118  | 42      | 28               | 48   | 37%                | Pair             |               |
|                                                                 | <i>Corvus</i>          | 43                   | 1              | 12 | 30               |      |         |                  |      |                    | Coop             |               |
|                                                                 | <i>Cyanocorax</i>      | 16                   | 0              | 0  | 16               |      |         |                  |      |                    |                  |               |
| Corvidae                                                        | Monarchini             | 18                   | 26.2           | 12 | <b>0.01</b>      | 98   | 56      | 5                | 37   | 12%                | Pair             |               |
|                                                                 | <i>Monarcha</i>        | 31                   | 4              | 20 | 7                |      |         |                  |      |                    | Coop             |               |
|                                                                 | <i>Erythrocercus</i>   | 3                    | 0              | 0  | 3                |      |         |                  |      |                    |                  |               |
| Corvidae                                                        | Pachycephalini         | 9                    | 11.2           | 2  | <b>0.003</b>     | 51   | 38      | 2                | 11   | 15%                | Pair             |               |
|                                                                 | <i>Pachycephala</i>    | 33                   | 3              | 9  | 21               |      |         |                  |      |                    | Coop             |               |
|                                                                 | <i>Pitohui</i>         | 6                    | 0              | 0  | 6                |      |         |                  |      |                    |                  |               |
| Corvidae                                                        | Vangini                | 19                   | 26.1           | 11 | <b>0.006</b>     | 58   | 28      | 20               | 10   | 67%                | Pair             |               |
|                                                                 | <i>Xenopirostris</i> * | 3                    | 0              | 0  | 3                |      |         |                  |      |                    | Coop             |               |
|                                                                 | <i>Platysteira</i>     | 10                   | 0              | 0  | 10               |      |         |                  |      |                    |                  |               |

|                  |                        |     |      |    |                  |     |     |    |    |     |      |
|------------------|------------------------|-----|------|----|------------------|-----|-----|----|----|-----|------|
| Laniidae         | Laniidae               | 3   | 13.2 | 2  | <b>0.001</b>     | 30  | 8   | 6  | 16 | 27% | Pair |
|                  | <i>Lanius</i>          | 26  | 16   | 1  | 9                |     |     |    |    |     | Coop |
|                  | <i>Corvinella</i>      | 2   | 0    | 0  | 2                |     |     |    |    |     | Coop |
| Petroicidae      | Petroicidae            | 13  | 23.1 | 7  | <b>0.002</b>     | 44  | 24  | 8  | 12 | 40% | Pair |
|                  | <i>Petroica</i>        | 10  | 3    | 1  | 6                |     |     |    |    |     | Coop |
|                  | <i>Eopsaltria</i>      | 5   | 0    | 1  | 4                |     |     |    |    |     | Coop |
| <b>Passerida</b> |                        |     |      |    |                  |     |     |    |    |     |      |
| Certhiidae       | Troglodytinae          | 17  | 43.3 | 10 | <b>&lt;0.001</b> | 75  | 42  | 11 | 21 | 34% | Pair |
|                  | <i>Thryothorus</i>     | 27  | 0    | 0  | 27               |     |     |    |    |     | Coop |
|                  | <i>Campylorhynchus</i> | 13  | 0    | 0  | 13               |     |     |    |    |     | Coop |
| Fringillidae     | Cardinalini            | 13  | 12.8 | 7  | 0.08             | 42  | 22  | 4  | 15 | 21% | Pair |
|                  | <i>Passerina</i>       | 6   | 4    | 0  | 2                |     |     |    |    |     | Coop |
|                  | <i>Saltator</i>        | 13  | 1    | 0  | 12               |     |     |    |    |     | Coop |
| Fringillidae     | Icterini               | 13  | 24.2 | 10 | <b>0.007</b>     | 97  | 37  | 9  | 38 | 19% | Pair |
|                  | orioles                | 25  | 7    | 4  | 14               |     |     |    |    |     | Coop |
|                  | grackles b             | 15  | 4    | 0  | 11               |     |     |    |    |     | Coop |
| Fringillidae     | Thraupini              | 105 | 57.1 | 42 | 0.06             | 413 | 317 | 15 | 79 | 16% | Pair |
|                  | <i>Sporophila</i>      | 32  | 18   | 0  | 14               |     |     |    |    |     | Coop |
|                  | <i>Tangara</i>         | 49  | 1    | 1  | 47               |     |     |    |    |     | Coop |
| Muscicapidae     | Muscicapini            | 18  | 25.6 | 12 | <b>0.01</b>      | 117 | 65  | 7  | 45 | 13% | Pair |
|                  | <i>Ficedula</i>        | 28  | 15   | 4  | 9                |     |     |    |    |     | Coop |
|                  | <i>Dioptrornis</i>     | 3   | 0    | 0  | 3                |     |     |    |    |     | Coop |
| Paridae          | Parinae                | 12  | 26.5 | 6  | <b>&lt;0.001</b> | 53  | 20  | 7  | 26 | 21% | Pair |
|                  | <i>Poecile</i>         | 12  | 1    | 0  | 11               |     |     |    |    |     | Coop |
|                  | <i>Melaniparus</i>     | 14  | 0    | 0  | 14               |     |     |    |    |     | Coop |
| Paridae          | Remizinae              | 4   | 7.6  | 3  | 0.06             | 12  | 5   | 4  | 2  | 67% | Pair |
|                  | <i>Remiz</i>           | 3   | 3    | 0  | 0                |     |     |    |    |     | Coop |
|                  | <i>Anthoscopus</i>     | 7   | 1    | 0  | 6                |     |     |    |    |     | Coop |
| Passeridae       | Ploceinae              | 16  | 38.5 | 9  | <b>&lt;0.001</b> | 117 | 46  | 10 | 32 | 24% | Pair |
|                  | <i>Ploceus</i>         | 63  | 3    | 3  | 57               |     |     |    |    |     | Coop |
|                  | <i>Plocepasser</i>     | 4   | 1    | 0  | 3                |     |     |    |    |     | Coop |
| Pycnonotidae     | Pycnonotidae           | 21  | 20.6 | 13 | 0.08             | 138 | 95  | 8  | 34 | 19% | Pair |
|                  | <i>Pycnonotus</i>      | 40  | 3    | 0  | 37               |     |     |    |    |     | Coop |
|                  | <i>Criniger</i>        | 5   | 0    | 0  | 5                |     |     |    |    |     | Coop |
| Sturnidae        | Mimini                 | 11  | 17.5 | 6  | <b>0.008</b>     | 34  | 16  | 5  | 13 | 28% | Pair |
|                  | <i>Toxostoma</i>       | 10  | 2    | 1  | 7                |     |     |    |    |     | Coop |
|                  | <i>Nesomimus</i>       | 4   | 0    | 4  | 0                |     |     |    |    |     | Coop |
| Sturnidae        | Sturnini               | 27  | 47.8 | 15 | <b>&lt;0.001</b> | 114 | 64  | 17 | 33 | 34% | Pair |
|                  | <i>Aplonis</i>         | 24  | 3    | 17 | 4                |     |     |    |    |     | Coop |
|                  | <i>Lamprotornis</i>    | 20  | 4    | 1  | 15               |     |     |    |    |     | Coop |
| Sylviidae        | Acrocephalinae         | 34  | 53   | 19 | <b>&lt;0.001</b> | 221 | 112 | 13 | 94 | 12% | Pair |
|                  | <i>Phylloscopus</i>    | 46  | 32   | 4  | 10               |     |     |    |    |     | Coop |
|                  | <i>Eremomela</i>       | 11  | 0    | 0  | 11               |     |     |    |    |     | Coop |
| Sylviidae        | Timaliini              | 51  | 80.8 | 24 | <b>&lt;0.001</b> | 236 | 160 | 35 | 41 | 46% | Pair |
|                  | <i>Alcippe</i> *       | 18  | 0    | 0  | 18               |     |     |    |    |     | Coop |

|                   |     |     |     |     | Coop |
|-------------------|-----|-----|-----|-----|------|
| <i>Turdoides</i>  | 29  | 0   | 0   | 29  |      |
| Total pair        | 540 | 125 | 100 | 315 | %    |
| Total cooperative | 282 | 22  | 9   | 251 | %    |

\* the genus *Alcippe* was used in preference to *Stachyris* in this contrast as the pattern of parental care in *Stachyris* is uncertain, and it is probably not monophyletic (Cibois et al. 2002). *Xenopirostris* is used rather than *Batis*, as the pattern of care in *Batis* is also uncertain. Both changes are conservative with respect to the results reported in the manuscript.

---

Table 4 reference

Cibois, A., Kalyakin, M. V., Lian-Xian, H. & Pasquet, E. 2002 Molecular phylogenetics of babblers (Timaliidae): reevaluation of the genera *Yuhina* and *Stachyris*. *J. Avian Biol.* **33**, 380–390.
